# Supplementary material for: Nonsense-mediated mRNA decay factors target short poly(A)-tailed mRNAs lacking a premature termination codon
Source: Nat Commun. 2026 Apr 17;17:5333. doi: 10.1038/s41467-026-72132-1 (PMC13273070; doi:10.1038/s41467-026-72132-1)
Supplement: Supplementary file 4 — Supplementary Data 2 [file 41467_2026_72132_MOESM4_ESM.xlsx]

## Sheet: RIPvsInput.complete
Id	WT_2154_R1	WT_2154_R2	WT_2154_R3	RIP_3730_R1	RIP_3730_R2	RIP_3730_R3	del_1667_R1	del_1667_R2	del_1667_R3	norm.WT_2154_R1	norm.WT_2154_R2	norm.WT_2154_R3	norm.RIP_3730_R1	norm.RIP_3730_R2	norm.RIP_3730_R3	norm.del_1667_R1	norm.del_1667_R2	norm.del_1667_R3	baseMean	WT_Input	Upf1_RIP	upf1_delta	FoldChange_RIPvsInput	log2FoldChange_RIPvsInput	pvalue	padj
CUT_GIM_0001	28	14	18	20	14	36	15	25	20	23	15	16	23	16	35	15	20	20	20.32	18	25	18	1.321	0.401	0.347917078026191	0.405036757702138
CUT_GIM_0002	2	1	3	1	1	2	5	1	2	2	1	3	1	1	2	5	1	2	1.93	2	1	3	0.881	-0.183	0.84209831354634	0.870555634474746
CUT_GIM_0003	13	3	5	2	5	4	9	10	5	11	3	4	2	6	4	9	8	5	5.81	6	4	7	0.746	-0.422	0.535837277315973	0.592131860303968
CUT_GIM_0004	2	1	3	2	3	1	1	1	3	2	1	3	2	3	1	1	1	3	1.86	2	2	2	1.213	0.278	0.758024473051133	0.797377459193537
CUT_GIM_0005	138	101	129	484	405	797	173	247	188	114	105	113	558	461	783	175	201	184	299.27	111	601	187	5.248	2.392	3.76088335109345e-23	2.46631216839944e-22
CUT_GIM_0006	14	14	18	33	21	45	14	5	11	12	15	16	38	24	44	14	4	11	19.67	14	35	10	2.329	1.22	0.00665342020767085	0.0103256133528342
CUT_GIM_0007	7	9	4	25	8	19	10	3	4	6	9	4	29	9	19	10	2	4	10.19	6	19	5	2.537	1.343	0.0292027234838275	0.0417651482844215
CUT_GIM_0008	877	815	1033	6841	1803	4420	1083	1196	1174	726	848	904	7883	2051	4344	1094	973	1147	2218.94	826	4759	1071	5.021	2.328	1.60449920236072e-11	5.11182597567813e-11
CUT_GIM_0009	7	6	1	26	10	14	8	7	5	6	6	1	30	11	14	8	6	5	9.63	4	18	6	3.848	1.944	0.00233904367289046	0.00382722827798907
CUT_GIM_0010	10	7	14	56	17	39	11	9	18	8	7	12	65	19	38	11	7	18	20.67	9	41	12	3.915	1.969	5.6631995843031e-05	0.000108992342460748
CUT_GIM_0011	9	6	8	9	8	9	12	7	11	7	6	7	10	9	9	12	6	11	8.62	7	9	10	1.311	0.391	0.476832417313945	0.534714866973493
CUT_GIM_0012	2	2	3	9	13	9	4	3	11	2	2	3	10	15	9	4	2	11	6.4	2	11	6	4.385	2.133	0.00558991210508546	0.00876357832841812
CUT_GIM_0013	99	62	104	60	62	115	58	64	56	82	65	91	69	71	113	59	52	55	72.85	79	84	55	1.053	0.074	0.782344252440914	0.81863135154231
CUT_GIM_0014	8	6	5	1	2	3	5	3	8	7	6	4	1	2	3	5	2	8	4.33	6	2	5	0.443	-1.175	0.136692269054762	0.17438113072444
CUT_GIM_0015	4	2	3	7	8	4	2	0	1	3	2	3	8	9	4	2	0	1	3.57	3	7	1	2.155	1.107	0.161120708887825	0.202088290658272
CUT_GIM_0016	26	10	11	14	9	15	5	5	8	22	10	10	16	10	15	5	4	8	11.07	14	14	6	1.006	0.009	0.985554962990288	0.987498525036826
CUT_GIM_0017	1	2	1	1	1	1	3	0	0	1	2	1	1	1	1	3	0	0	1.12	1	1	1	0.908	-0.14	0.891255301242211	0.912174588396959
CUT_GIM_0018	0	0	0	0	0	1	0	0	0	0	0	0	0	0	1	0	0	0	0.11	0	0	0	1.203	0.267	0.773523464153056	NA
CUT_GIM_0019	1378	920	1067	1022	695	912	1020	1213	1057	1141	958	934	1178	790	896	1031	987	1033	994.18	1011	955	1017	0.939	-0.09	0.619072084874409	0.671974399390893
CUT_GIM_0020	5	3	6	115	27	34	16	5	5	4	3	5	133	31	33	16	4	5	26.03	4	66	8	11.299	3.498	3.33286783279348e-10	9.62151519121162e-10
CUT_GIM_0021	510	336	315	407	274	220	252	260	253	422	350	276	469	312	216	255	212	247	306.45	349	332	238	0.933	-0.101	0.672884127438501	0.721736935589382
CUT_GIM_0022	78	79	104	71	57	75	97	111	88	65	82	91	82	65	74	98	90	86	81.39	79	74	91	0.931	-0.103	0.698846422172128	0.745546767345581
CUT_GIM_0023	3186	2289	3129	5653	4686	7736	1056	1429	1068	2638	2382	2738	6514	5329	7603	1067	1163	1044	3386.52	2586	6482	1091	2.473	1.306	4.86942199325472e-12	1.60428715571397e-11
CUT_GIM_0024	15	11	26	8	5	7	7	17	9	12	11	23	9	6	7	7	14	9	10.9	15	7	10	0.518	-0.95	0.0896405297081806	0.118045890260288
CUT_GIM_0025	30	18	27	6	2	5	11	6	12	25	19	24	7	2	5	11	5	12	12.12	23	5	9	0.226	-2.144	0.000242767458420397	0.000440046613789478
CUT_GIM_0026	378	260	309	281	73	181	225	260	304	313	271	270	324	83	178	227	212	297	241.64	285	195	245	0.641	-0.641	0.0533240036571314	0.073061825153856
CUT_GIM_0027	10	7	14	19	18	30	8	11	14	8	7	12	22	20	29	8	9	14	14.49	9	24	10	2.438	1.286	0.00635031049611555	0.00988013958961607
CUT_GIM_0028	1	1	2	3	5	4	5	6	2	1	1	2	3	6	4	5	5	2	3.18	1	4	4	2.61	1.384	0.113901739723693	0.147485399491532
CUT_GIM_0029	217	184	230	63	29	33	183	245	229	180	192	201	73	33	32	185	199	224	146.51	191	46	203	0.241	-2.053	1.89463789141461e-10	5.55741425679497e-10
CUT_GIM_0030	529	453	518	828	424	494	539	706	565	438	471	453	954	482	485	545	575	552	550.67	454	640	557	1.343	0.426	0.101180659029106	0.132096657514706
CUT_GIM_0031	13	9	14	129	98	244	50	48	64	11	9	12	149	111	240	51	39	63	76.04	11	167	51	14.172	3.825	8.5530942284366e-28	7.33319582931109e-27
CUT_GIM_0032	21	13	29	81	45	136	28	30	22	17	14	25	93	51	134	28	24	22	45.41	19	93	25	4.616	2.207	6.79630262274334e-09	1.79119513868693e-08
CUT_GIM_0033	3	1	1	7	3	4	2	3	1	2	1	1	8	3	4	2	2	1	2.81	1	5	2	2.634	1.397	0.109514371113703	0.142150943111711
CUT_GIM_0034	1	0	0	0	0	0	0	0	0	1	0	0	0	0	0	0	0	0	0.09	0	0	0	0.903	-0.148	0.873389109647834	NA
CUT_GIM_0035	4	2	2	6	3	1	3	2	0	3	2	2	7	3	1	3	2	0	2.57	2	4	2	1.233	0.302	0.717641039515692	0.761841677669002
CUT_GIM_0036	30	16	28	99	35	49	17	20	19	25	17	25	114	40	48	17	16	19	35.56	22	67	17	2.758	1.464	0.000231501137093782	0.000420996310002791
CUT_GIM_0037	4	3	3	1	1	0	1	1	1	3	3	3	1	1	0	1	1	1	1.57	3	1	1	0.387	-1.368	0.176715099353368	0.219854428941069
CUT_GIM_0038	42	26	38	8	2	2	24	22	28	35	27	33	9	2	2	24	18	27	19.79	32	4	23	0.151	-2.725	1.64107488240365e-06	3.60278058909808e-06
CUT_GIM_0039	259	193	184	244	381	229	184	197	168	214	201	161	281	433	225	186	160	164	225.15	192	313	170	1.576	0.657	0.00800740563578094	0.0123146308086892
CUT_GIM_0040	7	5	11	92	59	71	15	15	15	6	5	10	106	67	70	15	12	15	33.95	7	81	14	10.643	3.412	2.01405897858668e-14	7.86903818915546e-14
CUT_GIM_0041	10	8	7	10	1	8	5	4	6	8	8	6	12	1	8	5	3	6	6.38	7	7	5	0.834	-0.261	0.68443695121392	0.731978604547073
CUT_GIM_0042	7	2	7	7	6	12	3	5	5	6	2	6	8	7	12	3	4	5	5.85	5	9	4	1.726	0.788	0.21989473772815	0.268374924813698
CUT_GIM_0043	6	5	5	0	3	2	3	1	3	5	5	4	0	3	2	3	1	3	2.97	5	2	2	0.464	-1.109	0.204655910532264	0.25135144198424
CUT_GIM_0044	4	1	4	2	6	14	0	2	1	3	1	4	2	7	14	0	2	1	3.71	3	8	1	1.989	0.992	0.220187776659708	0.268704506896966
CUT_GIM_0045	4	3	5	7	1	7	2	0	6	3	3	4	8	1	7	2	0	6	3.86	3	5	3	1.181	0.24	0.755449523616476	0.795045310967411
CUT_GIM_0046	2157	1532	1537	3447	9760	6204	1805	2343	1834	1786	1595	1345	3972	11100	6097	1824	1907	1792	3490.84	1575	7056	1841	4.127	2.045	8.15140969569634e-12	2.65414805527744e-11
CUT_GIM_0047	1808	1361	1676	2191	781	800	1698	1901	2140	1497	1417	1467	2525	888	786	1715	1547	2091	1548.2	1460	1400	1784	0.877	-0.19	0.559774824536356	0.615152209848774
CUT_GIM_0048	3	2	2	0	3	2	0	4	3	2	2	2	0	3	2	0	3	3	1.99	2	2	2	0.705	-0.505	0.591802357515846	0.645793477442354
CUT_GIM_0049	0	0	1	0	0	1	1	0	0	0	0	1	0	0	1	1	0	0	0.32	0	0	0	1.041	0.058	0.950631345761856	NA
CUT_GIM_0050	5	2	0	10	5	7	0	0	1	4	2	0	12	6	7	0	0	1	3.48	2	8	0	3.064	1.615	0.0672451179461346	0.0907369842683651
CUT_GIM_0051	230	152	151	12	34	66	126	133	147	190	158	132	14	39	65	127	108	144	108.6	160	39	126	0.239	-2.064	3.89560072931412e-07	9.02895480419771e-07
CUT_GIM_0052	80	40	51	8	7	6	42	41	40	66	42	45	9	8	6	42	33	39	32.28	51	8	38	0.163	-2.62	2.15092282595555e-09	5.8673399029217e-09
CUT_GIM_0053	2	4	4	0	0	1	0	0	0	2	4	4	0	0	1	0	0	0	1.14	3	0	0	0.342	-1.547	0.156201490523809	0.196572325895029
CUT_GIM_0054	3	5	16	1	1	5	4	12	14	2	5	14	1	1	5	4	10	14	6.26	7	2	9	0.41	-1.287	0.0874508884578556	0.115416630716658
CUT_GIM_0055	28	22	19	155	81	98	29	36	23	23	23	17	179	92	96	29	29	22	56.76	21	122	27	5.524	2.466	3.55874813517137e-13	1.26868611066543e-12
CUT_GIM_0056	10	0	3	1	4	1	0	4	3	8	0	3	1	5	1	0	3	3	2.64	4	2	2	0.669	-0.58	0.546810538295333	0.602548604480835
CUT_GIM_0057	1	0	0	1	1	3	0	1	1	1	0	0	1	1	3	0	1	1	0.87	0	2	1	2.322	1.215	0.259792227254435	0.311601351503164
CUT_GIM_0058	25	7	7	15	17	13	5	5	4	21	7	6	17	19	13	5	4	4	10.73	11	16	4	1.483	0.568	0.277892716796888	0.331406703591023
CUT_GIM_0059	1147	815	972	1074	389	381	993	1041	1253	950	848	851	1238	442	374	1003	847	1225	864.25	883	685	1025	0.718	-0.478	0.143655324284802	0.182216012112471
CUT_GIM_0060	0	1	3	2	1	0	2	2	1	0	1	3	2	1	0	2	2	1	1.3	1	1	2	0.917	-0.125	0.902232214427078	0.920828441728807
CUT_GIM_0061	9	4	8	10	6	13	4	6	5	7	4	7	12	7	13	4	5	5	7.06	6	11	5	1.542	0.625	0.284791573803238	0.338631901858429
CUT_GIM_0062	1977	1034	718	1020	789	622	909	1090	993	1637	1076	628	1175	897	611	918	887	970	977.97	1114	894	925	0.831	-0.268	0.312603589302624	0.36810616128481
CUT_GIM_0063	14	7	5	1	2	2	8	7	3	12	7	4	1	2	2	8	6	3	5.04	8	2	6	0.318	-1.654	0.0366251380368866	0.0515602172146798
CUT_GIM_0064	100	70	87	373	178	347	72	69	74	83	73	76	430	202	341	73	56	72	156.25	77	324	67	3.991	1.997	9.95653999136542e-15	3.98739295199096e-14
CUT_GIM_0065	11	7	9	245	125	145	11	21	21	9	7	8	282	142	142	11	17	21	71.11	8	189	16	20.354	4.347	1.27625649672519e-23	8.6309799888487e-23
CUT_GIM_0066	1403	1034	1183	602	310	401	1246	1477	1265	1162	1076	1035	694	353	394	1259	1202	1236	934.55	1091	480	1232	0.433	-1.209	2.34891515686282e-07	5.53527374936457e-07
CUT_GIM_0067	34	13	15	86	49	117	27	20	25	28	14	13	99	56	115	27	16	24	43.62	18	90	22	4.741	2.245	1.55402692101474e-09	4.28209351543934e-09
CUT_GIM_0068	4	1	4	11	8	8	5	12	3	3	1	4	13	9	8	5	10	3	6.14	3	10	6	2.992	1.581	0.0304044453682057	0.0433564793865591
CUT_GIM_0069	9	2	10	4	5	16	16	31	23	7	2	9	5	6	16	16	25	22	12.02	6	9	21	1.287	0.365	0.533014566564388	0.58951431240502
CUT_GIM_0070	144	92	89	70	88	94	94	89	104	119	96	78	81	100	92	95	72	102	92.78	98	91	90	0.943	-0.084	0.758074924836574	0.797377459193537
CUT_GIM_0071	611	379	400	383	291	256	440	616	428	506	394	350	441	331	252	445	501	418	404.28	417	341	455	0.816	-0.294	0.164549373316235	0.20599230462498
CUT_GIM_0072	1	1	6	8	2	3	2	3	3	1	1	5	9	2	3	2	2	3	3.22	2	5	2	1.776	0.829	0.326540199839312	0.382589610519571
CUT_GIM_0073	167	136	158	2976	1026	2467	834	937	882	138	142	138	3429	1167	2424	843	763	862	1100.64	139	2340	823	15.048	3.911	1.45047700522735e-38	2.29057760582255e-37
CUT_GIM_0074	4	0	1	11	7	4	3	5	1	3	0	1	13	8	4	3	4	1	4.09	1	8	3	4.171	2.06	0.0190076021684903	0.0279329525831209
CUT_GIM_0075	0	0	3	27	0	1	0	1	2	0	0	3	31	0	1	0	1	2	4.17	1	11	1	2.441	1.287	0.222497044947545	0.271211063654638
CUT_GIM_0076	2	1	1	1	1	7	1	6	2	2	1	1	1	1	7	1	5	2	2.29	1	3	3	1.696	0.762	0.413506476251945	0.472960426884626
CUT_GIM_0077	22	21	23	144	71	110	20	20	19	18	22	20	166	81	108	20	16	19	52.23	20	118	18	5.495	2.458	3.85942706143618e-12	1.27874297249626e-11
CUT_GIM_0078	2	3	2	3	1	1	0	4	3	2	3	2	3	1	1	0	3	3	2.03	2	2	2	0.94	-0.09	0.922165085698726	0.937977299284125
CUT_GIM_0079	16	10	14	11	7	12	9	8	14	13	10	12	13	8	12	9	7	14	10.85	12	11	10	0.907	-0.14	0.775708912453326	0.812852793304301
CUT_GIM_0080	12	11	9	11	5	14	11	12	15	10	11	8	13	6	14	11	10	15	10.77	10	11	12	1.06	0.085	0.870252850438092	0.894046137162158
CUT_GIM_0081	21	22	21	52	37	122	44	49	48	17	23	18	60	42	120	44	40	47	45.76	19	74	44	3.427	1.777	7.26821747940057e-06	1.51590914624799e-05
CUT_GIM_0082	47	36	47	245	113	230	69	63	68	39	37	41	282	129	226	70	51	66	104.65	39	212	62	5.105	2.352	3.56824391102604e-16	1.56057254282374e-15
CUT_GIM_0083	26	13	17	62	24	41	30	20	23	22	14	15	71	27	40	30	16	22	28.67	17	46	23	2.591	1.373	0.000285656919711401	0.000515072791814139
CUT_GIM_0084	9	4	6	34	11	18	6	5	2	7	4	5	39	13	18	6	4	2	10.93	5	23	4	3.502	1.808	0.00166350163984259	0.00276879079379013
CUT_GIM_0085	18	8	12	3	2	0	8	9	6	15	8	11	3	2	0	8	7	6	6.75	11	2	7	0.204	-2.294	0.00356898090940132	0.0057219249426895
CUT_GIM_0086	33	30	41	139	89	243	74	103	88	27	31	36	160	101	239	75	84	86	93.25	31	167	82	4.996	2.321	3.59589597666455e-13	1.28153828555358e-12
CUT_GIM_0087	5	3	3	14	3	11	3	8	3	4	3	3	16	3	11	3	7	3	5.86	3	10	4	2.517	1.332	0.068215674680564	0.0918820164035352
CUT_GIM_0088	1	0	1	2	0	1	1	1	1	1	0	1	2	0	1	1	1	1	0.87	1	1	1	1.304	0.383	0.714159957175285	0.758835539148061
CUT_GIM_0089	16	11	12	11	11	28	18	22	13	13	11	11	13	13	28	18	18	13	15.19	12	18	16	1.414	0.499	0.302167222300053	0.35696786896466
CUT_GIM_0090	2	1	2	1	2	2	1	3	3	2	1	2	1	2	2	1	2	3	1.8	2	2	2	1.106	0.145	0.873189197642185	0.896747426280567
CUT_GIM_0091	5	4	6	5	0	0	2	2	1	4	4	5	6	0	0	2	2	1	2.66	4	2	2	0.377	-1.406	0.143315016088638	0.181863316105095
CUT_GIM_0092	0	0	1	2	6	3	4	0	2	0	0	1	2	7	3	4	0	2	2.11	0	4	2	4.867	2.283	0.0356823850254412	0.0503665118259821
CUT_GIM_0093	17	13	19	737	312	769	35	50	32	14	14	17	849	355	756	35	41	31	234.59	15	653	36	39.066	5.288	2.98235355973802e-47	7.127154130695e-46
CUT_GIM_0094	92	53	73	362	201	447	87	107	115	76	55	64	417	229	439	88	87	112	174.18	65	362	96	5.312	2.409	3.09641966990033e-20	1.71005483281925e-19
CUT_GIM_0095	3	0	2	0	1	0	0	0	2	2	0	2	0	1	0	0	0	2	0.81	1	0	1	0.625	-0.678	0.526280215595153	0.583059404573849
CUT_GIM_0096	3	2	1	39	32	36	8	6	10	2	2	1	45	36	35	8	5	10	16.1	2	39	8	16.338	4.03	2.2711462804261e-09	6.18518187673256e-09
CUT_GIM_0097	4	6	6	18	8	22	6	8	5	3	6	5	21	9	22	6	7	5	9.3	5	17	6	3.071	1.619	0.00835314275786671	0.0127902026033059
CUT_GIM_0098	22	7	17	38	25	47	32	30	25	18	7	15	44	28	46	32	24	24	26.66	13	39	27	2.836	1.504	0.000208178112623868	0.000379882795771787
CUT_GIM_0099	42	32	39	15	25	42	17	22	29	35	33	34	17	28	41	17	18	28	28.07	34	29	21	0.831	-0.268	0.468125686746717	0.52672027492029
CUT_GIM_0100	1	0	1	1	1	7	0	6	2	1	0	1	1	1	7	0	5	2	1.97	1	3	2	2.489	1.315	0.200981110722887	0.247175885067108
CUT_GIM_0101	18	11	17	51	39	79	27	21	21	15	11	15	59	44	78	27	17	21	31.88	14	60	22	4.177	2.062	7.63825640509964e-08	1.86464726028816e-07
CUT_GIM_0102	47	33	41	54	40	50	38	35	34	39	34	36	62	45	49	38	28	33	40.68	36	52	33	1.403	0.488	0.106153619368221	0.138126177033407
CUT_GIM_0103	2262	1161	1543	368	111	353	1093	824	950	1873	1208	1350	424	126	347	1104	671	928	892.51	1477	299	901	0.192	-2.382	7.23846339271068e-19	3.68257219012699e-18
CUT_GIM_0104	1	1	2	1	0	0	1	0	3	1	1	2	1	0	0	1	0	3	0.97	1	0	1	0.579	-0.788	0.459151804523573	0.518119736158987
CUT_GIM_0105	639	470	575	12104	6836	9415	501	671	666	529	489	503	13947	7774	9253	506	546	651	3799.86	507	10325	568	19.385	4.277	1.20472263317014e-72	1.26832330551588e-70
CUT_GIM_0106	5	3	10	21	10	16	2	0	6	4	3	9	24	11	16	2	0	6	8.35	5	17	3	3.043	1.606	0.0160510322783748	0.023812665126963
CUT_GIM_0107	6	6	11	7	8	15	5	4	11	5	6	10	8	9	15	5	3	11	7.98	7	11	6	1.445	0.531	0.346058672118217	0.403114198801184
CUT_GIM_0108	7	2	8	26	7	27	9	13	9	6	2	7	30	8	27	9	11	9	11.98	5	22	10	3.712	1.892	0.00184302188976341	0.00305367273554165
CUT_GIM_0109	2260	1157	1538	363	108	347	1091	821	949	1872	1204	1346	418	123	341	1102	668	927	889.1	1474	294	899	0.189	-2.405	5.7037962546549e-19	2.92472852268087e-18
CUT_GIM_0110	3	5	4	21	10	24	13	5	15	2	5	4	24	11	24	13	4	15	11.36	4	20	11	4.424	2.145	0.000662060356692915	0.0011508013280252
CUT_GIM_0111	1	1	4	9	5	4	1	6	1	1	1	4	10	6	4	1	5	1	3.58	2	7	2	2.718	1.442	0.0971401109023591	0.1272194705822
CUT_GIM_0112	35	30	27	3	4	7	9	12	17	29	31	24	3	5	7	9	10	17	14.91	28	5	12	0.195	-2.356	3.06805430580922e-05	6.07785770769394e-05
CUT_GIM_0113	2	4	2	0	2	1	5	2	2	2	4	2	0	2	1	5	2	2	2.16	3	1	3	0.573	-0.805	0.398975890992255	0.458177040212915
CUT_GIM_0114	11	9	16	244	98	124	13	19	24	9	9	14	281	111	122	13	15	23	66.56	11	171	17	13.79	3.786	2.43061604913874e-17	1.13389936727486e-16
CUT_GIM_0115	5	5	4	1	1	4	3	5	3	4	5	4	1	1	4	3	4	3	3.23	4	2	3	0.571	-0.809	0.319429237570056	0.375160811079766
CUT_GIM_0116	9	6	14	0	6	4	7	1	11	7	6	12	0	7	4	7	1	11	6.15	8	4	6	0.504	-0.988	0.210610444862062	0.258094972594175
CUT_GIM_0117	113	53	34	144	36	59	90	82	83	94	55	30	166	41	58	91	67	81	75.79	60	88	80	1.357	0.44	0.226090266468717	0.274976262099964
CUT_GIM_0118	20	9	7	63	21	36	19	8	16	17	9	6	73	24	35	19	7	16	22.81	11	44	14	3.761	1.911	2.61431015207211e-05	5.20634431443673e-05
CUT_GIM_0119	1087	757	874	1597	1599	1882	689	758	654	900	788	765	1840	1819	1850	696	617	639	1101.49	818	1836	651	2.236	1.161	8.95971487470884e-13	3.10876567772706e-12
CUT_GIM_0120	32	17	10	21	8	3	7	7	8	27	18	9	24	9	3	7	6	8	12.2	18	12	7	0.66	-0.599	0.273236623591154	0.32622018627771
CUT_GIM_0121	21	14	13	17	18	20	17	19	13	17	15	11	20	20	20	17	15	13	16.49	14	20	15	1.35	0.433	0.305558413595803	0.36057312140569
CUT_GIM_0122	7	7	9	67	13	13	43	47	63	6	7	8	77	15	13	43	38	62	29.89	7	35	48	3.671	1.876	0.00154419856069265	0.00258346519402352
CUT_GIM_0123	15	25	20	19	8	18	10	14	11	12	26	18	22	9	18	10	11	11	15.21	19	16	11	0.897	-0.157	0.742461616122749	0.784130722639895
CUT_GIM_0124	286	232	258	256	68	110	207	295	215	237	241	226	295	77	108	209	240	210	204.88	235	160	220	0.635	-0.655	0.0663685330121105	0.0896627371999448
CUT_GIM_0125	86	62	43	92	122	32	25	38	34	71	65	38	106	139	31	25	31	33	59.89	58	92	30	1.436	0.522	0.176347081599987	0.219419931386014
CUT_GIM_0126	17	17	6	19	10	13	10	15	10	14	18	5	22	11	13	10	12	10	12.79	12	15	11	1.259	0.333	0.504768986661803	0.56194440107934
CUT_GIM_0127	2	2	2	1	1	2	1	3	0	2	2	2	1	1	2	1	2	0	1.47	2	1	1	0.871	-0.199	0.834268043315198	0.86368323477865
CUT_GIM_0128	92	59	69	26	30	37	47	56	49	76	61	60	30	34	36	47	46	48	48.82	66	33	47	0.522	-0.938	0.00211718438520791	0.00348274447150051
CUT_GIM_0129	29	20	19	87	30	52	26	16	25	24	21	17	100	34	51	26	13	24	34.52	21	62	21	2.708	1.437	0.000228229784153716	0.000415370387419455
CUT_GIM_0130	7	1	0	4	1	0	0	2	3	6	1	0	5	1	0	0	2	3	1.9	2	2	2	0.938	-0.092	0.928192686121802	0.942631418268826
CUT_GIM_0131	1	2	0	13	2	3	1	3	2	1	2	0	15	2	3	1	2	2	3.17	1	7	2	4.043	2.015	0.0396377171869933	0.0555203599481246
CUT_GIM_0132	2	5	4	7	4	5	4	4	2	2	5	4	8	5	5	4	3	2	4.13	4	6	3	1.53	0.614	0.397181281294638	0.45661194817601
CUT_GIM_0133	1005	824	1022	253	303	417	727	787	783	832	858	894	292	345	410	734	640	765	641.17	861	349	713	0.406	-1.3	6.16475718968288e-12	2.01909620287652e-11
CUT_GIM_0134	5	3	5	4	5	0	5	1	4	4	3	4	5	6	0	5	1	4	3.52	4	4	3	0.862	-0.215	0.794923906213652	0.830233333453636
CUT_GIM_0135	0	0	1	12	1	2	8	6	6	0	0	1	14	1	2	8	5	6	4.07	0	6	6	5.847	2.548	0.0132758788515369	0.0199027479485646
CUT_GIM_0136	8	3	6	5	1	13	2	3	1	7	3	5	6	1	13	2	2	1	4.46	5	7	2	1.144	0.194	0.789814604213525	0.825561132812098
CUT_GIM_0137	140	108	112	62	69	91	110	102	114	116	112	98	71	78	89	111	83	111	96.81	109	79	102	0.743	-0.429	0.0930214411436201	0.122208944486155
CUT_GIM_0138	1127	835	942	540	745	515	543	785	592	933	869	824	622	847	506	549	639	579	707.61	875	658	589	0.745	-0.425	0.0381834416378909	0.0536054419726565
CUT_GIM_0139	443	273	320	366	563	425	242	350	242	367	284	280	422	640	418	244	285	237	352.96	310	493	255	1.544	0.627	0.00622751720248796	0.00969942236815598
CUT_GIM_0140	5	4	3	3	0	3	0	3	1	4	4	3	3	0	3	0	2	1	2.31	4	2	1	0.704	-0.506	0.577125774139292	0.631724596908183
CUT_GIM_0141	144	103	130	3244	1472	2020	188	227	216	119	107	114	3738	1674	1985	190	185	211	924.8	113	2466	195	20.006	4.322	1.5622106389128e-57	6.38321451969753e-56
CUT_GIM_0142	2	3	6	12	9	19	6	6	6	2	3	5	14	10	19	6	5	6	7.73	3	14	6	3.742	1.904	0.00388642452318113	0.00620871592315716
CUT_GIM_0143	15	8	19	83	32	36	32	35	35	12	8	17	96	36	35	32	28	34	33.31	12	56	31	3.991	1.997	9.01915326793248e-06	1.86743134459708e-05
CUT_GIM_0144	3	1	3	9	6	4	5	1	2	2	1	3	10	7	4	5	1	2	3.9	2	7	3	2.687	1.426	0.0770049799911005	0.102855205872214
CUT_GIM_0145	419	273	270	1573	724	1046	365	455	382	347	284	236	1813	823	1028	369	370	373	627.08	289	1221	371	4.025	2.009	3.97433210185214e-15	1.62562285412125e-14
CUT_GIM_0146	2	2	2	1	1	2	1	3	1	2	2	2	1	1	2	1	2	1	1.57	2	1	1	0.852	-0.232	0.802412249894565	0.837081731143357
CUT_GIM_0147	5	5	11	4	1	1	11	13	12	4	5	10	5	1	1	11	11	12	6.57	6	2	11	0.416	-1.264	0.0949080364887281	0.124547480562299
CUT_GIM_0148	1	2	0	1	0	8	2	2	2	1	2	0	1	0	8	2	2	2	1.95	1	3	2	1.675	0.744	0.456446876267702	0.515515434045073
CUT_GIM_0149	8	1	1	0	2	3	3	2	1	7	1	1	0	2	3	3	2	1	2.16	3	2	2	0.907	-0.141	0.879167668636423	0.902332107472795
CUT_GIM_0150	391	247	325	380	277	230	330	347	307	324	257	284	438	315	226	333	282	300	306.68	288	326	305	1.103	0.141	0.529091761234414	0.58578553498677
CUT_GIM_0151	5	3	7	266	107	77	14	14	23	4	3	6	307	122	76	14	11	22	62.81	4	168	16	28.201	4.818	1.03719525949075e-17	4.94720971526896e-17
CUT_GIM_0152	40	40	42	171	82	133	40	41	48	33	42	37	197	93	131	40	33	47	72.58	37	140	40	3.557	1.831	2.88190098057157e-08	7.28801014043699e-08
CUT_GIM_0153	0	0	0	0	0	0	0	0	0	0	0	0	0	0	0	0	0	0	0	0	0	0	1	0	NA	NA
CUT_GIM_0154	23	8	5	14	8	5	6	5	8	19	8	4	16	9	5	6	4	8	8.87	10	10	6	0.983	-0.025	0.964531409022208	0.971596841453631
CUT_GIM_0155	16	10	15	19	5	18	6	11	20	13	10	13	22	6	18	6	9	20	12.96	12	15	12	1.138	0.187	0.718973898394271	0.763048676472205
CUT_GIM_0156	41	46	46	33	13	28	51	78	48	34	48	40	38	15	28	52	63	47	40.48	41	27	54	0.677	-0.563	0.138865663706653	0.176889486164807
CUT_GIM_0157	6	0	4	12	2	5	2	4	3	5	0	4	14	2	5	2	3	3	4.19	3	7	3	2.004	1.003	0.215555158946967	0.263601673027862
CUT_GIM_0158	8	9	4	3	0	3	5	2	3	7	9	4	3	0	3	5	2	3	3.95	7	2	3	0.393	-1.346	0.108061526488642	0.140389883106867
CUT_GIM_0159	1086	755	933	593	565	331	644	647	655	899	786	817	683	643	325	651	527	640	663.36	834	550	606	0.655	-0.611	0.0192000885854634	0.0281980941573112
CUT_GIM_0160	3	1	1	8	1	8	12	3	7	2	1	1	9	1	8	12	2	7	4.89	1	6	7	3.046	1.607	0.0528752673833072	0.072506497845732
CUT_GIM_0161	3	0	2	3	3	2	1	1	2	2	0	2	3	3	2	1	1	2	1.87	1	3	1	1.787	0.838	0.368313287485296	0.426022872171946
CUT_GIM_0162	0	2	2	4	1	13	2	2	3	0	2	2	5	1	13	2	2	3	3.21	1	6	2	3.08	1.623	0.07804166710897	0.104081508950338
CUT_GIM_0163	49	39	50	77	64	86	34	45	38	41	41	44	89	73	85	34	37	37	53.23	42	82	36	1.926	0.945	0.000841910541894495	0.00144730612143705
CUT_GIM_0164	4	2	9	23	15	30	6	8	5	3	2	8	27	17	29	6	7	5	11.53	4	24	6	4.934	2.303	0.000121023694055206	0.000226212874076957
CUT_GIM_0165	0	1	1	0	2	0	0	1	1	0	1	1	0	2	0	0	1	1	0.66	1	1	1	0.994	-0.008	0.994015084917175	0.994696033767949
CUT_GIM_0166	4	0	1	161	25	102	9	6	6	3	0	1	186	28	100	9	5	6	37.58	1	105	7	45.804	5.517	1.13746497973733e-14	4.52738956172019e-14
CUT_GIM_0167	15	5	9	32	4	13	6	7	11	12	5	8	37	5	13	6	6	11	11.36	8	18	8	1.711	0.775	0.181045438053507	0.224763304907392
CUT_GIM_0168	75	55	60	35	54	34	48	61	56	62	57	53	40	61	33	48	50	55	51.1	57	45	51	0.785	-0.349	0.260161325477521	0.311948004261268
CUT_GIM_0169	31	27	23	318	126	249	62	73	55	26	28	20	366	143	245	63	59	54	111.57	25	251	59	9.379	3.229	9.17459623261396e-21	5.20205393373735e-20
CUT_GIM_0170	2	1	1	0	1	0	0	0	0	2	1	1	0	1	0	0	0	0	0.52	1	0	0	0.655	-0.611	0.561964420794341	0.617384245689825
CUT_GIM_0171	11	8	6	29	13	30	7	6	16	9	8	5	33	15	29	7	5	16	14.22	7	26	9	2.984	1.577	0.00379755641171576	0.0060742190291966
CUT_GIM_0172	59	41	62	235	85	188	66	51	61	49	43	54	271	97	185	67	42	60	96.2	49	184	56	3.485	1.801	2.0921777000934e-09	5.7124272437597e-09
CUT_GIM_0173	4	2	2	31	8	15	10	2	3	3	2	2	36	9	15	10	2	3	9.04	2	20	5	6.465	2.693	0.000112815983583736	0.000211615984616299
CUT_GIM_0174	14	9	5	1	3	6	8	17	15	12	9	4	1	3	6	8	14	15	8.04	8	3	12	0.46	-1.12	0.10504287806013	0.136817997437659
CUT_GIM_0175	49	41	43	19	12	17	38	33	42	41	43	38	22	14	17	38	27	41	31.05	41	18	35	0.444	-1.171	0.00203953774073103	0.00336164147224017
CUT_GIM_0176	5	2	5	1	2	1	1	4	7	4	2	4	1	2	1	1	3	7	2.9	3	1	4	0.519	-0.947	0.283137328873919	0.337007824935895
CUT_GIM_0177	5	1	3	2	2	3	4	7	7	4	1	3	2	2	3	4	6	7	3.55	3	2	6	0.978	-0.033	0.967070728052069	0.973568963474886
CUT_GIM_0178	9	7	6	7	2	6	5	3	6	7	7	5	8	2	6	5	2	6	5.51	6	5	4	0.804	-0.315	0.62701281139536	0.679457688609623
CUT_GIM_0179	3	0	3	4	3	1	0	1	2	2	0	3	5	3	1	0	1	2	1.88	2	3	1	1.591	0.67	0.484458880668523	0.542122616057872
CUT_GIM_0180	0	0	0	0	1	0	0	1	1	0	0	0	0	1	0	0	1	1	0.33	0	0	1	1.213	0.278	0.768043605003677	NA
CUT_GIM_0181	91	51	43	300	110	131	35	62	57	75	53	38	346	125	129	35	50	56	100.79	55	200	47	3.303	1.724	7.04853120262073e-06	1.47231700062096e-05
CUT_GIM_0182	2	3	3	2	0	1	0	0	3	2	3	3	2	0	1	0	0	3	1.51	3	1	1	0.55	-0.862	0.399191602027715	0.458336909146775
CUT_GIM_0183	1514	1359	1719	3190	2809	4278	1211	1850	1325	1254	1414	1504	3676	3195	4204	1223	1506	1295	2141.26	1391	3692	1341	2.634	1.397	1.95831664146338e-13	7.12259205482136e-13
CUT_GIM_0184	13	9	13	14	14	14	8	12	13	11	9	11	16	16	14	8	10	13	11.99	10	15	10	1.391	0.476	0.319287795938071	0.3750700827636
CUT_GIM_0185	0	0	0	0	0	0	0	0	0	0	0	0	0	0	0	0	0	0	0	0	0	0	1	0	NA	NA
CUT_GIM_0186	188	140	201	668	312	423	389	465	388	156	146	176	770	355	416	393	378	379	352.02	159	514	383	3.045	1.607	3.36925839388207e-09	9.06588846210127e-09
CUT_GIM_0187	1	0	3	0	1	3	1	0	1	1	0	3	0	1	3	1	0	1	1.06	1	1	1	1.161	0.215	0.835751495301131	0.864835913759764
CUT_GIM_0188	0	0	0	0	0	1	1	0	0	0	0	0	0	0	1	1	0	0	0.22	0	0	0	1.211	0.277	0.76514918656751	NA
CUT_GIM_0189	22	18	27	8	18	24	32	24	32	18	19	24	9	20	24	32	20	31	21.89	20	18	28	0.884	-0.178	0.676303396997697	0.724739247805143
CUT_GIM_0190	6	4	5	5	5	5	3	7	6	5	4	4	6	6	5	3	6	6	4.94	4	6	5	1.159	0.212	0.746587233957584	0.787918216926608
CUT_GIM_0191	25	14	14	291	103	117	15	27	19	21	15	12	335	117	115	15	22	19	74.52	16	189	19	10.314	3.367	1.9601715311457e-16	8.70310201860513e-16
CUT_GIM_0192	76	54	51	817	390	443	93	135	100	63	56	45	941	444	435	94	110	98	253.96	55	607	101	10.307	3.366	1.18829131198724e-29	1.13450753855253e-28
CUT_GIM_0193	0	0	0	0	0	0	0	0	0	0	0	0	0	0	0	0	0	0	0	0	0	0	1	0	NA	NA
CUT_GIM_0194	27	24	23	6	4	5	21	22	29	22	25	20	7	5	5	21	18	28	16.81	22	6	22	0.263	-1.925	0.000316090823994927	0.00056706130936517
CUT_GIM_0195	4540	3297	4093	9840	9526	11724	3127	3284	3203	3760	3432	3582	11338	10834	11522	3159	2673	3130	5936.62	3591	11231	2987	3.112	1.638	3.71737862398058e-27	3.08094231204518e-26
CUT_GIM_0196	448	360	434	65	67	58	224	274	247	371	375	380	75	76	57	226	223	241	224.93	375	69	230	0.187	-2.418	9.71960325807235e-27	7.87678804950301e-26
CUT_GIM_0197	9	9	17	12	4	13	2	8	7	7	9	15	14	5	13	2	7	7	8.69	10	11	5	1.002	0.003	0.995235139131492	0.995831649618171
CUT_GIM_0198	138	113	133	2772	1103	2252	262	320	254	114	118	116	3194	1254	2213	265	260	248	864.81	116	2220	258	17.493	4.129	1.07201260435118e-46	2.51557013944737e-45
CUT_GIM_0199	7	7	6	10	5	5	8	5	2	6	7	5	12	6	5	8	4	2	6.06	6	8	5	1.11	0.151	0.807669080656649	0.841739131058021
CUT_GIM_0200	277	241	273	266	151	237	226	265	235	229	251	239	307	172	233	228	216	230	233.78	240	237	225	0.973	-0.039	0.868653932332071	0.892717426192295
CUT_GIM_0201	51	33	58	188	70	153	64	95	68	42	34	51	217	80	150	65	77	66	86.93	42	149	69	3.281	1.714	9.31019305720695e-07	2.08108102652105e-06
CUT_GIM_0202	1	1	1	3	3	0	0	1	0	1	1	1	3	3	0	0	1	0	1.16	1	2	0	1.433	0.519	0.613067671431637	0.666199442844533
CUT_GIM_0203	5151	3692	4951	3997	3727	3001	3282	4026	3297	4266	3843	4333	4606	4239	2949	3316	3276	3222	3783.3	4147	3931	3271	0.939	-0.09	0.651351219446499	0.702120685402803
CUT_GIM_0204	421	325	347	513	777	518	281	308	281	349	338	304	591	884	509	284	251	275	420.4	330	661	270	1.944	0.959	3.7364996442875e-05	7.33861089800736e-05
CUT_GIM_0205	96	51	44	300	110	133	36	63	59	80	53	39	346	125	131	36	51	58	101.99	57	201	48	3.227	1.69	9.78214106312961e-06	2.01932698222457e-05
CUT_GIM_0206	83	62	64	484	207	455	133	173	131	69	65	56	558	235	447	134	141	128	203.64	63	413	134	6.166	2.624	4.61474461099758e-18	2.24606020508612e-17
CUT_GIM_0207	43	40	35	118	46	66	67	73	67	36	42	31	136	52	65	68	59	65	61.51	36	84	64	2.156	1.108	0.00164997111329679	0.00274744406240898
CUT_GIM_0208	9	16	12	4	3	4	14	15	16	7	17	11	5	3	4	14	12	16	9.84	12	4	14	0.399	-1.326	0.0330316422829142	0.046879739096203
CUT_GIM_0209	4	7	3	1	1	1	1	1	2	3	7	3	1	1	1	1	1	2	2.25	4	1	1	0.378	-1.404	0.135339796167422	0.172812593751365
CUT_GIM_0210	0	0	0	0	0	0	0	0	0	0	0	0	0	0	0	0	0	0	0	0	0	0	1	0	NA	NA
CUT_GIM_0211	1	0	1	13	4	9	4	1	1	1	0	1	15	5	9	4	1	1	3.99	1	10	2	8.322	3.057	0.00162095936210667	0.00270221556427654
CUT_GIM_0212	2	4	5	13	12	5	10	9	6	2	4	4	15	14	5	10	7	6	7.45	3	11	8	2.665	1.414	0.0368520431098615	0.0518546629478436
CUT_GIM_0213	29	20	21	12	16	24	17	15	18	24	21	18	14	18	24	17	12	18	18.42	21	19	16	0.889	-0.17	0.682864253840344	0.730564100556465
CUT_GIM_0214	204	170	180	53	90	44	199	164	163	169	177	158	61	102	43	201	133	159	133.77	168	69	164	0.41	-1.286	4.35395909167256e-05	8.49421802091579e-05
CUT_GIM_0215	1	1	4	3	0	0	0	1	0	1	1	4	3	0	0	0	1	0	1.07	2	1	0	0.653	-0.616	0.562484824977832	0.617839803053948
CUT_GIM_0216	93	54	47	59	50	75	54	61	61	77	56	41	68	57	74	55	50	60	59.64	58	66	55	1.142	0.191	0.526444579972355	0.583130934744734
CUT_GIM_0217	4	3	1	4	4	3	0	3	0	3	3	1	5	5	3	0	2	0	2.43	2	4	1	1.542	0.625	0.470716597892786	0.529024251103587
CUT_GIM_0218	23	20	27	185	48	83	39	35	48	19	21	24	213	55	82	39	28	47	58.62	21	117	38	4.628	2.21	1.89853641017827e-07	4.50026297958281e-07
CUT_GIM_0219	5	0	5	13	6	15	4	5	11	4	0	4	15	7	15	4	4	11	7.1	3	12	6	3.784	1.92	0.00768733976675248	0.0118499211864226
CUT_GIM_0220	14	16	16	6	3	10	8	6	8	12	17	14	7	3	10	8	5	8	9.24	14	7	7	0.508	-0.978	0.088617904274981	0.116870424258823
CUT_GIM_0221	5	3	2	5	2	0	2	1	1	4	3	2	6	2	0	2	1	1	2.32	3	3	1	0.778	-0.361	0.678904291861756	0.727259653010952
CUT_GIM_0222	35	13	16	25	22	19	9	11	22	29	14	14	29	25	19	9	9	22	18.73	19	24	13	1.273	0.348	0.458492143290017	0.51747529326706
CUT_GIM_0223	64	78	60	12	17	15	40	39	49	53	81	53	14	19	15	40	32	48	39.4	62	16	40	0.269	-1.893	1.32388552355909e-06	2.92511367523378e-06
CUT_GIM_0224	9	9	13	6	5	20	17	17	20	7	9	11	7	6	20	17	14	20	12.33	9	11	17	1.069	0.096	0.851898603698643	0.878433520058444
CUT_GIM_0225	4	0	2	0	1	6	1	2	1	3	0	2	0	1	6	1	2	1	1.75	2	2	1	1.122	0.166	0.865674440310401	0.890438474559224
CUT_GIM_0226	1816	1038	1026	211	369	203	636	722	729	1504	1080	898	243	420	199	643	588	712	698.57	1161	287	648	0.25	-1.997	1.76201283413474e-11	5.58624036345594e-11
CUT_GIM_0227	2	1	2	0	2	4	2	2	2	2	1	2	0	2	4	2	2	2	1.81	2	2	2	1.157	0.211	0.820246383950954	0.852262758322295
CUT_GIM_0228	20	7	9	3	3	3	8	7	4	17	7	8	3	3	3	8	6	4	6.58	11	3	6	0.376	-1.412	0.037383720438859	0.0525584885765767
CUT_GIM_0229	3	0	0	2	1	1	4	3	5	2	0	0	2	1	1	4	2	5	2.03	1	1	4	1.595	0.673	0.499167687681032	0.556556969586923
CUT_GIM_0230	0	1	1	1	1	5	0	1	1	0	1	1	1	1	5	0	1	1	1.21	1	2	1	2.17	1.118	0.282326939573699	0.336180213558004
CUT_GIM_0231	6	2	2	1	0	2	0	3	6	5	2	2	1	0	2	0	2	6	2.25	3	1	3	0.452	-1.144	0.252356747973523	0.303993501372909
CUT_GIM_0232	7	4	4	19	7	18	5	10	5	6	4	4	22	8	18	5	8	5	8.79	5	16	6	3.073	1.62	0.0104788036713129	0.0158888412745508
CUT_GIM_0233	86	69	73	557	236	434	241	278	295	71	72	64	642	268	427	243	226	288	255.74	69	446	252	6.024	2.591	9.21035317540583e-19	4.64332127729908e-18
CUT_GIM_0234	48	30	40	683	205	400	79	84	106	40	31	35	787	233	393	80	68	104	196.78	35	471	84	11.657	3.543	3.9958947869615e-25	2.97048514506565e-24
CUT_GIM_0235	9	3	12	6	5	7	8	13	10	7	3	11	7	6	7	8	11	10	7.67	7	7	10	0.952	-0.071	0.904854381361545	0.923182146026804
CUT_GIM_0236	28	37	46	220	69	191	36	26	30	23	39	40	253	78	188	36	21	29	78.72	34	173	29	4.453	2.155	5.6244671756603e-08	1.38812087465187e-07
CUT_GIM_0237	0	0	1	0	0	0	0	1	1	0	0	1	0	0	0	0	1	1	0.3	0	0	1	0.904	-0.145	0.876016362015179	NA
CUT_GIM_0238	27	21	22	145	71	104	26	31	21	22	22	19	167	81	102	26	25	21	53.95	21	117	24	5.18	2.373	5.45769711777168e-12	1.79254211687127e-11
CUT_GIM_0239	1	3	2	33	14	24	3	10	4	1	3	2	38	16	24	3	8	4	10.92	2	26	5	10.468	3.388	7.5215446595082e-06	1.56650812495122e-05
CUT_GIM_0240	1	0	0	0	0	0	0	1	0	1	0	0	0	0	0	0	1	0	0.18	0	0	0	0.895	-0.16	0.862967771917381	NA
CUT_GIM_0241	147	102	119	1354	516	728	139	139	183	122	106	104	1560	587	715	140	113	179	402.99	111	954	144	7.771	2.958	5.39354501956663e-22	3.30687130633031e-21
CUT_GIM_0242	14	13	21	9	5	12	2	3	10	12	14	18	10	6	12	2	2	10	9.51	15	9	5	0.672	-0.574	0.297151091508194	0.351656520152122
CUT_GIM_0243	5	5	5	52	18	19	7	8	5	4	5	4	60	20	19	7	7	5	14.58	4	33	6	5.755	2.525	1.65700070884628e-05	3.34954338065692e-05
CUT_GIM_0244	0	1	6	0	0	1	1	5	0	0	1	5	0	0	1	1	4	0	1.37	2	0	2	0.541	-0.887	0.407820167742158	0.467188165889115
CUT_GIM_0245	2618	1191	917	4475	2454	3131	823	927	908	2168	1240	803	5156	2791	3077	831	754	887	1967.54	1404	3675	824	2.63	1.395	4.72404301644592e-07	1.08564732920722e-06
CUT_GIM_0246	4	8	9	6	1	10	7	6	9	3	8	8	7	1	10	7	5	9	6.46	6	6	7	0.881	-0.183	0.780297063845601	0.817001298100501
CUT_GIM_0247	3	1	12	11	5	8	16	7	7	2	1	11	13	6	8	16	6	7	7.66	5	9	10	1.791	0.841	0.222790541113933	0.271455558696425
CUT_GIM_0248	2	8	4	1	1	1	3	2	0	2	8	4	1	1	1	3	2	0	2.38	5	1	2	0.386	-1.372	0.15274985173274	0.192726707768171
CUT_GIM_0249	32	20	28	204	65	140	35	32	30	27	21	25	235	74	138	35	26	29	67.68	24	149	30	5.589	2.483	1.00322832736521e-12	3.47061167365003e-12
CUT_GIM_0250	25	19	21	53	38	40	10	12	19	21	20	18	61	43	39	10	10	19	26.77	20	48	13	2.324	1.216	0.00234398944734515	0.00383371038231987
CUT_GIM_0251	21	22	25	185	110	179	23	35	44	17	23	22	213	125	176	23	28	43	74.56	21	171	31	7.868	2.976	2.00916534821621e-17	9.41423667171396e-17
CUT_GIM_0252	73	69	50	353	184	340	99	123	104	60	72	44	407	209	334	100	100	102	158.66	59	317	101	5.193	2.377	7.11289711872706e-15	2.87219473840513e-14
CUT_GIM_0253	22	12	9	22	15	26	5	20	11	18	12	8	25	17	26	5	16	11	15.4	13	23	11	1.676	0.745	0.14551306579348	0.184372296092661
CUT_GIM_0254	3	7	5	0	1	2	2	1	0	2	7	4	0	1	2	2	1	0	2.23	4	1	1	0.365	-1.456	0.136601793405796	0.174290703978615
CUT_GIM_0255	80	65	69	37	22	29	54	71	60	66	68	60	43	25	28	55	58	59	51.27	65	32	57	0.504	-0.988	0.00173682463938296	0.00288548944211392
CUT_GIM_0256	2	0	0	1	0	0	1	2	0	2	0	0	1	0	0	1	2	0	0.61	1	0	1	0.958	-0.062	0.95323166084724	0.962372802476099
CUT_GIM_0257	43	25	43	74	51	65	54	57	42	36	26	38	85	58	64	55	46	41	49.82	33	69	47	2.019	1.014	0.00093115409663511	0.00159295370711139
CUT_GIM_0258	32	18	12	10	10	8	10	8	10	27	19	11	12	11	8	10	7	10	12.54	19	10	9	0.604	-0.727	0.144379179281201	0.183034832835769
CUT_GIM_0259	25	19	22	54	40	40	10	14	19	21	20	19	62	45	39	10	11	19	27.42	20	49	13	2.349	1.232	0.00178927365991738	0.00296924907551754
CUT_GIM_0260	24	8	13	43	18	44	51	72	71	20	8	11	50	20	43	52	59	69	36.93	13	38	60	2.688	1.427	0.000798411316596247	0.00137614080320704
CUT_GIM_0261	3	2	1	4	9	7	4	4	2	2	2	1	5	10	7	4	3	2	4.05	2	7	3	3.166	1.663	0.0401556850263091	0.0561785388743503
CUT_GIM_0262	16	10	13	62	31	38	6	6	7	13	10	11	71	35	37	6	5	7	21.87	11	48	6	3.773	1.916	1.2824120553467e-05	2.62364623227968e-05
CUT_GIM_0263	17	15	20	29	15	25	21	22	24	14	16	18	33	17	25	21	18	23	20.54	16	25	21	1.508	0.593	0.147830043183625	0.186983643754069
CUT_GIM_0264	27	29	35	52	22	68	50	61	68	22	30	31	60	25	67	51	50	66	44.62	28	51	56	1.706	0.771	0.0350398885918446	0.0495014673699584
CUT_GIM_0265	1066	751	931	131	259	311	669	821	736	883	782	815	151	295	306	676	668	719	588.2	827	251	688	0.301	-1.734	3.80683003646024e-11	1.18095608723319e-10
CUT_GIM_0266	19	14	21	200	79	132	10	18	18	16	15	18	230	90	130	10	15	18	60.12	16	150	14	8.337	3.06	3.87499843691367e-14	1.48081202530324e-13
CUT_GIM_0267	69	58	61	67	127	179	79	83	83	57	60	53	77	144	176	80	68	81	88.55	57	132	76	2.201	1.138	0.000300997556862412	0.000541397175541657
CUT_GIM_0268	8996	7120	6902	9823	43655	21835	10759	13251	10384	7450	7411	6041	11319	49648	21458	10870	10784	10149	15014.31	6967	27475	10601	3.397	1.764	7.95314092522825e-07	1.78662831319141e-06
CUT_GIM_0269	226	165	208	800	487	833	239	275	249	187	172	182	922	554	819	241	224	243	393.76	180	765	236	4.128	2.046	1.00837261011486e-21	6.06788997003203e-21
CUT_GIM_0270	34	24	35	788	185	324	69	83	65	28	25	31	908	210	318	70	68	64	191.26	28	479	67	13.786	3.785	1.22060652050742e-21	7.32238593359841e-21
CUT_GIM_0271	8	10	16	19	20	19	8	16	12	7	10	14	22	23	19	8	13	12	14.13	10	21	11	1.959	0.97	0.0429203206058017	0.0597387883038826
CUT_GIM_0272	1	2	10	0	1	2	0	1	0	1	2	9	0	1	2	0	1	0	1.73	4	1	0	0.462	-1.115	0.267501128628222	0.320091971037211
CUT_GIM_0273	274	217	251	26	30	49	177	209	183	227	226	220	30	34	48	179	170	179	145.83	224	37	176	0.171	-2.551	3.27806181394191e-22	2.03762927434708e-21
CUT_GIM_0274	26	11	15	50	26	76	25	28	19	22	11	13	58	30	75	25	23	19	30.51	15	54	22	3.306	1.725	5.05288758821639e-05	9.78588736425203e-05
CUT_GIM_0275	56	27	22	173	72	83	10	12	14	46	28	19	199	82	82	10	10	14	54.45	31	121	11	3.631	1.86	3.27860843040805e-07	7.64915646230522e-07
CUT_GIM_0276	471	466	713	290	99	189	799	935	860	390	485	624	334	113	186	807	761	841	504.47	500	211	803	0.412	-1.28	9.91136168684626e-05	0.000186813181729815
CUT_GIM_0277	7	3	3	6	5	8	1	1	1	6	3	3	7	6	8	1	1	1	3.87	4	7	1	1.618	0.695	0.333789066475645	0.390339140481776
CUT_GIM_0278	8	4	15	48	18	26	12	11	16	7	4	13	55	20	26	12	9	16	18	8	34	12	3.884	1.958	0.000215345618211032	0.000392716743822428
CUT_GIM_0279	1794	1283	1650	4460	2784	3915	1541	1909	1753	1486	1335	1444	5139	3166	3847	1557	1554	1713	2360.18	1422	4051	1608	2.787	1.479	1.20777207201401e-13	4.45518448028904e-13
CUT_GIM_0280	2	1	2	1	1	1	0	0	0	2	1	2	1	1	1	0	0	0	0.86	2	1	0	0.85	-0.234	0.821400241505261	0.853234064198265
CUT_GIM_0281	10	8	10	52	15	51	12	8	13	8	8	9	60	17	50	12	7	13	20.42	8	42	11	4.322	2.112	1.44551987494446e-05	2.94343008513695e-05
CUT_GIM_0282	18	29	12	999	817	1504	47	50	40	15	30	11	1151	929	1478	47	41	39	415.69	19	1186	42	59.391	5.892	6.6511466264949e-58	2.79587408191437e-56
CUT_GIM_0283	0	0	0	0	0	1	0	0	0	0	0	0	0	0	1	0	0	0	0.11	0	0	0	1.203	0.267	0.773523464153056	NA
CUT_GIM_0284	2176	1708	2194	885	1689	1097	1760	2040	1830	1802	1778	1920	1020	1921	1078	1778	1660	1789	1638.39	1833	1340	1742	0.721	-0.472	0.0533781688699192	0.0731274655819315
CUT_GIM_0285	0	0	0	4	5	4	1	1	0	0	0	0	5	6	4	1	1	0	1.78	0	5	1	8.138	3.025	0.00609477201174211	0.00950280263231731
CUT_GIM_0286	5	3	0	12	9	10	2	2	3	4	3	0	14	10	10	2	2	3	5.3	2	11	2	3.946	1.981	0.0115729383348673	0.0174392465997756
CUT_GIM_0287	22	13	10	4	1	2	10	3	21	18	14	9	5	1	2	10	2	21	9.03	14	3	11	0.217	-2.202	0.00459487648857148	0.00728077649429781
CUT_GIM_0288	35	31	27	42	36	36	22	24	34	29	32	24	48	41	35	22	20	33	31.62	28	41	25	1.427	0.513	0.156101836221502	0.1964680730301
CUT_GIM_0289	0	0	0	0	0	0	0	0	0	0	0	0	0	0	0	0	0	0	0	0	0	0	1	0	NA	NA
CUT_GIM_0290	501	435	557	168	116	66	620	725	600	415	453	487	194	132	65	626	590	586	394.26	452	130	601	0.28	-1.836	5.52198163647379e-09	1.46422695703634e-08
CUT_GIM_0291	71	42	53	54	33	42	93	115	99	59	44	46	62	38	41	94	94	97	63.8	50	47	95	0.943	-0.085	0.767167228205974	0.805563503352953
CUT_GIM_0292	162	152	216	99	62	102	172	233	157	134	158	189	114	71	100	174	190	153	142.56	160	95	172	0.602	-0.733	0.00670702074963775	0.0104060335210126
CUT_GIM_0293	30	26	28	679	197	206	49	58	43	25	27	25	782	224	202	50	47	42	158.22	26	403	46	12.533	3.648	9.73609841530115e-20	5.21669170477805e-19
CUT_GIM_0294	12	10	10	4	10	15	9	18	15	10	10	9	5	11	15	9	15	15	10.91	10	10	13	1.001	0.002	0.997313187146062	0.997654674284273
CUT_GIM_0295	35	30	29	84	69	129	37	34	36	29	31	25	97	78	127	37	28	35	54.21	28	101	33	3.401	1.766	3.40619749148142e-08	8.56754711266723e-08
CUT_GIM_0296	3	2	3	44	13	21	5	4	6	2	2	3	51	15	21	5	3	6	11.94	2	29	5	8.94	3.16	2.83764366447488e-06	6.12725496360928e-06
CUT_GIM_0297	37	30	32	40	22	40	42	28	36	31	31	28	46	25	39	42	23	35	33.41	30	37	33	1.184	0.244	0.478508755230815	0.53649173113569
CUT_GIM_0298	10	4	7	15	2	19	15	6	5	8	4	6	17	2	19	15	5	5	9.08	6	13	8	1.711	0.775	0.206052310240495	0.252880413512962
CUT_GIM_0299	2	2	4	7	5	5	5	4	4	2	2	4	8	6	5	5	3	4	4.24	3	6	4	2.153	1.106	0.140431374981611	0.178514200808779
CUT_GIM_0300	69	44	34	22	28	31	17	21	24	57	46	30	25	32	30	17	17	23	30.9	44	29	19	0.688	-0.54	0.148831991551948	0.18814914033709
CUT_GIM_0301	7	5	6	16	7	12	6	1	6	6	5	5	18	8	12	6	1	6	7.46	5	13	4	2.02	1.014	0.10135951431993	0.132285825814462
CUT_GIM_0302	13	13	17	19	15	27	9	16	12	11	14	15	22	17	27	9	13	12	15.39	13	22	11	1.601	0.679	0.125056365851797	0.160700317939752
CUT_GIM_0303	0	3	3	0	0	0	0	0	1	0	3	3	0	0	0	0	0	1	0.75	2	0	0	0.483	-1.049	0.323302048470324	0.379061677377768
CUT_GIM_0304	17	12	18	22	13	21	20	20	21	14	12	16	25	15	21	20	16	21	17.79	14	20	19	1.377	0.461	0.269365283460608	0.322025851920272
CUT_GIM_0305	1322	795	725	87	297	205	440	451	401	1095	827	635	100	338	201	445	367	392	488.86	852	213	401	0.252	-1.989	5.47663919378247e-08	1.35306565789729e-07
CUT_GIM_0306	4	1	1	3	1	4	1	1	1	3	1	1	3	1	4	1	1	1	1.84	2	3	1	1.436	0.522	0.56278807324006	0.618114795477757
CUT_GIM_0307	20	19	17	17	7	11	11	13	17	17	20	15	20	8	11	11	11	17	14.21	17	13	13	0.758	-0.4	0.405785521093919	0.465200633433508
CUT_GIM_0308	18	6	6	11	12	23	9	21	11	15	6	5	13	14	23	9	17	11	12.47	9	17	12	1.738	0.797	0.153482709973461	0.193505119079714
CUT_GIM_0309	43	23	25	13	7	9	25	25	26	36	24	22	15	8	9	25	20	25	20.47	27	11	23	0.41	-1.287	0.00381600269669944	0.0061020535732936
CUT_GIM_0310	3	0	0	0	0	0	1	0	0	2	0	0	0	0	0	1	0	0	0.39	1	0	0	0.824	-0.28	0.763880908824619	0.802529412103234
CUT_GIM_0311	26	22	22	144	67	100	45	51	47	22	23	19	166	76	98	45	42	46	59.67	21	113	44	4.998	2.321	2.18638760739796e-11	6.88868308979579e-11
CUT_GIM_0312	4	1	4	15	4	7	3	2	1	3	1	4	17	5	7	3	2	1	4.69	3	10	2	2.777	1.474	0.051778115582551	0.0710854157304618
CUT_GIM_0313	7	4	2	12	7	12	2	5	6	6	4	2	14	8	12	2	4	6	6.36	4	11	4	2.47	1.304	0.0566500906325284	0.0772928148431672
CUT_GIM_0314	1	2	2	5	2	6	0	0	2	1	2	2	6	2	6	0	0	2	2.28	2	5	1	2.171	1.118	0.222578776881673	0.271275425339307
CUT_GIM_0315	6	3	10	4	3	2	3	4	4	5	3	9	5	3	2	3	3	4	4.11	6	3	3	0.674	-0.568	0.435911553922917	0.495324232453509
CUT_GIM_0316	16	7	16	501	74	339	15	27	19	13	7	14	577	84	333	15	22	19	120.54	11	331	19	21.861	4.45	3.28882331778761e-19	1.70966144535881e-18
CUT_GIM_0317	4	4	9	3	1	4	5	4	8	3	4	8	3	1	4	5	3	8	4.44	5	3	5	0.624	-0.681	0.353633297577559	0.41099539686637
CUT_GIM_0318	6	2	2	4	1	1	2	0	2	5	2	2	5	1	1	2	0	2	2.17	3	2	1	0.777	-0.365	0.680673833438086	0.728620904786798
CUT_GIM_0319	252	163	200	660	347	566	234	201	225	209	170	175	760	395	556	236	164	220	320.52	185	570	207	2.979	1.575	1.64691750896236e-13	6.01809818941031e-13
CUT_GIM_0320	0	0	0	0	0	0	0	0	0	0	0	0	0	0	0	0	0	0	0	0	0	0	1	0	NA	NA
CUT_GIM_0321	10	7	5	0	3	1	3	10	7	8	7	4	0	3	1	3	8	7	4.71	6	1	6	0.268	-1.9	0.0298037246171429	0.0425569801901188
CUT_GIM_0322	23	17	29	72	45	93	39	41	33	19	18	25	83	51	91	39	33	32	43.63	21	75	35	3.483	1.8	1.97356143021014e-07	4.67430864885198e-07
CUT_GIM_0323	12	3	9	23	11	12	6	7	7	10	3	8	27	13	12	6	6	7	10.04	7	17	6	2.198	1.136	0.0428201640215106	0.0596064844258932
CUT_GIM_0324	2	1	1	3	0	0	1	1	0	2	1	1	3	0	0	1	1	0	0.98	1	1	1	0.744	-0.426	0.684780398842142	0.732211889547925
CUT_GIM_0325	96	77	107	29	19	23	48	51	40	80	80	94	33	22	23	48	42	39	51.11	85	26	43	0.311	-1.684	2.45048990361135e-07	5.76533622178421e-07
CUT_GIM_0326	2	0	3	7	1	7	2	0	3	2	0	3	8	1	7	2	0	3	2.81	2	5	2	2.767	1.468	0.104529142723493	0.136194398691798
CUT_GIM_0327	2	2	1	1	2	2	1	0	0	2	2	1	1	2	2	1	0	0	1.22	2	2	0	1.152	0.204	0.83410951871969	0.863619117510138
CUT_GIM_0328	4	2	0	3	3	7	0	0	1	3	2	0	3	3	7	0	0	1	2.24	2	4	0	1.845	0.884	0.34835341913822	0.405463949805702
CUT_GIM_0329	20	7	8	215	51	110	21	8	22	17	7	7	248	58	108	21	7	22	54.88	10	138	17	11.691	3.547	7.68740244371102e-18	3.68629400727152e-17
CUT_GIM_0330	70	61	79	22	16	19	33	34	28	58	63	69	25	18	19	33	28	27	37.91	63	21	29	0.335	-1.579	6.82044202137641e-06	1.42633653296e-05
CUT_GIM_0331	1	1	8	3	2	3	5	6	3	1	1	7	3	2	3	5	5	3	3.38	3	3	4	1.088	0.122	0.882286664967159	0.9048974869937
CUT_GIM_0332	5	3	6	29	17	26	2	8	7	4	3	5	33	19	26	2	7	7	11.8	4	26	5	5.449	2.446	5.99404466431117e-05	0.000115132159676431
CUT_GIM_0333	14	13	20	53	30	62	34	35	37	12	14	18	61	34	61	34	28	36	33.08	15	52	33	3.488	1.802	2.58116105070677e-06	5.58685831423585e-06
CUT_GIM_0334	0	0	0	0	0	0	0	0	0	0	0	0	0	0	0	0	0	0	0	0	0	0	1	0	NA	NA
CUT_GIM_0335	5	4	15	11	5	9	8	10	13	4	4	13	13	6	9	8	8	13	8.62	7	9	10	1.294	0.371	0.524676283210293	0.581392665047931
CUT_GIM_0336	719	462	432	214	461	228	283	318	306	595	481	378	247	524	224	286	259	299	365.9	485	332	281	0.674	-0.569	0.0592127958034747	0.0805167246636497
CUT_GIM_0337	264	219	150	92	90	97	119	161	138	219	228	131	106	102	95	120	131	135	140.85	193	101	129	0.544	-0.88	0.000669204692089146	0.00116270086704635
CUT_GIM_0338	13	6	10	107	23	33	7	8	9	11	6	9	123	26	32	7	7	9	25.56	9	60	8	5.526	2.466	2.18559748299554e-06	4.75887687465733e-06
CUT_GIM_0339	0	3	4	2	0	0	2	1	0	0	3	4	2	0	0	2	1	0	1.31	2	1	1	0.409	-1.29	0.233368729384172	0.282899063442264
CUT_GIM_0340	13	9	7	79	39	63	7	9	7	11	9	6	91	44	62	7	7	7	27.2	9	66	7	6.897	2.786	4.49782200598781e-10	1.2844953069886e-09
CUT_GIM_0341	66	33	58	1008	419	628	114	103	111	55	34	51	1161	477	617	115	84	108	300.27	47	752	102	14.943	3.901	4.10299464102989e-48	1.01799565552177e-46
CUT_GIM_0342	8	1	1	6	1	2	2	2	5	7	1	1	7	1	2	2	2	5	3.01	3	3	3	1.15	0.202	0.813119074086874	0.846211550430065
CUT_GIM_0343	10	8	8	3	9	10	3	6	6	8	8	7	3	10	10	3	5	6	6.77	8	8	5	0.947	-0.078	0.895137945096853	0.91543036844967
CUT_GIM_0344	7	2	6	0	0	1	1	4	3	6	2	5	0	0	1	1	3	3	2.37	4	0	2	0.2	-2.321	0.0276401003372323	0.0396954912794514
CUT_GIM_0345	26	27	36	259	132	191	32	29	31	22	28	32	298	150	188	32	24	30	89.29	27	212	29	7.305	2.869	3.70819835657801e-18	1.81693945471575e-17
CUT_GIM_0346	183	120	120	86	79	72	58	74	58	152	125	105	99	90	71	59	60	57	90.74	127	87	59	0.69	-0.535	0.0271427997765179	0.0390244535172722
CUT_GIM_0347	1	2	2	3	2	4	1	2	0	1	2	2	3	2	4	1	2	0	1.88	2	3	1	1.729	0.79	0.386762900237348	0.445642994692728
CUT_GIM_0348	11	5	5	10	16	21	6	6	12	9	5	4	12	18	21	6	5	12	10.19	6	17	8	2.387	1.255	0.0314096458054293	0.0447115098887259
CUT_GIM_0349	16	14	11	2	4	0	9	14	4	13	15	10	2	5	0	9	11	4	7.63	13	2	8	0.2	-2.322	0.00214497039784602	0.00352696272255925
CUT_GIM_0350	4	2	5	2	2	6	3	1	4	3	2	4	2	2	6	3	1	4	3.11	3	3	3	1.034	0.048	0.950200151584876	0.959478006689783
CUT_GIM_0351	10	3	11	8	9	4	1	3	2	8	3	10	9	10	4	1	2	2	5.54	7	8	2	1.07	0.097	0.882895778437981	0.905363291227295
CUT_GIM_0352	29	18	27	117	142	114	27	23	27	24	19	24	135	161	112	27	19	26	60.79	22	136	24	5.909	2.563	1.53502863625794e-14	6.0602515686859e-14
CUT_GIM_0353	1473	1219	1412	361	460	461	1153	1349	1175	1220	1269	1236	416	523	453	1165	1098	1148	947.52	1242	464	1137	0.376	-1.412	1.00525604277039e-15	4.27801242382184e-15
CUT_GIM_0354	3299	2328	2470	453	630	499	2216	2667	2308	2732	2423	2162	522	716	490	2239	2170	2256	1745.64	2439	576	2222	0.238	-2.073	3.04825745035601e-24	2.14719328299339e-23
CUT_GIM_0355	6	5	10	41	20	26	8	5	6	5	5	9	47	23	26	8	4	6	14.72	6	32	6	4.453	2.155	5.65118310494228e-05	0.000108796912297126
CUT_GIM_0356	18	12	29	38	12	28	10	7	13	15	12	25	44	14	28	10	6	13	18.47	17	29	10	1.492	0.577	0.191369510786443	0.236358374347172
CUT_GIM_0357	57	33	28	11	22	19	32	49	41	47	34	25	13	25	19	32	40	40	30.52	35	19	37	0.553	-0.855	0.035418596784564	0.0500243802301686
CUT_GIM_0358	20	13	11	3	6	3	8	8	11	17	14	10	3	7	3	8	7	11	8.7	14	4	9	0.375	-1.416	0.0249619632862314	0.0360753775615755
CUT_GIM_0359	1282	677	766	177	73	252	582	464	534	1062	705	670	204	83	248	588	378	522	495.43	812	178	496	0.213	-2.232	2.37526881728476e-14	9.23399580798061e-14
CUT_GIM_0360	2496	2014	2179	988	2353	1246	1447	1755	1550	2067	2096	1907	1138	2676	1225	1462	1428	1515	1723.82	2023	1680	1468	0.796	-0.329	0.224481819167471	0.273345268187045
CUT_GIM_0361	41	43	44	16	25	35	29	46	51	34	45	39	18	28	34	29	37	50	35.01	39	27	39	0.698	-0.518	0.127954596628268	0.164225965535193
CUT_GIM_0362	0	2	0	2	0	2	0	0	0	0	2	0	2	0	2	0	0	0	0.71	1	1	0	1.544	0.627	0.546709278183654	0.602493834859882
CUT_GIM_0363	41	18	16	24	20	22	17	17	16	34	19	14	28	23	22	17	14	16	20.6	22	24	16	1.106	0.145	0.715395301921974	0.759871795878948
CUT_GIM_0364	52	40	50	637	234	569	31	54	34	43	42	44	734	266	559	31	44	33	199.58	43	520	36	11.058	3.467	6.87050937317537e-23	4.43829588363335e-22
CUT_GIM_0365	8	4	13	20	6	20	8	1	5	7	4	11	23	7	20	8	1	5	9.5	7	17	5	1.974	0.981	0.0870238437326224	0.114910806537788
CUT_GIM_0366	10	3	9	15	3	4	3	2	1	8	3	8	17	3	4	3	2	1	5.5	6	8	2	1.066	0.093	0.888153372144672	0.909477769618177
CUT_GIM_0367	13	8	11	4	7	4	9	14	12	11	8	10	5	8	4	9	11	12	8.6	10	6	11	0.607	-0.72	0.216380088965026	0.264527431702614
CUT_GIM_0368	48	33	60	913	379	691	96	111	96	40	34	53	1052	431	679	97	90	94	285.54	42	721	94	15.705	3.973	5.49266914651303e-40	9.32955401833594e-39
CUT_GIM_0369	0	0	1	0	0	3	0	0	0	0	0	1	0	0	3	0	0	0	0.42	0	1	0	1.165	0.22	0.813743563345115	0.846710647426856
CUT_GIM_0370	8	5	9	6	11	23	6	12	10	7	5	8	7	13	23	6	10	10	9.7	7	14	9	1.839	0.879	0.114977768584885	0.148697455033529
CUT_GIM_0371	2	3	2	1	2	2	2	0	4	2	3	2	1	2	2	2	0	4	1.98	2	2	2	0.867	-0.206	0.822970395323298	0.854561226208287
CUT_GIM_0372	33	26	37	65	47	59	29	40	31	27	27	32	75	53	58	29	33	30	40.58	29	62	31	2.078	1.056	0.00116967393706625	0.00198069984474079
CUT_GIM_0373	26	10	15	6	5	5	15	16	20	22	10	13	7	6	5	15	13	20	12.26	15	6	16	0.431	-1.216	0.0277972471116316	0.0398966629509368
CUT_GIM_0374	11	4	9	16	4	8	4	2	1	9	4	8	18	5	8	4	2	1	6.52	7	10	2	1.271	0.346	0.567157915501299	0.622172003110565
CUT_GIM_0375	8	6	5	76	36	51	19	11	16	7	6	4	88	41	50	19	9	16	26.63	6	60	15	9.198	3.201	1.65112816653043e-11	5.25608383385307e-11
CUT_GIM_0376	0	0	0	2	1	1	1	0	0	0	0	0	2	1	1	1	0	0	0.6	0	1	0	2.314	1.211	0.260004598158408	0.311824069589404
CUT_GIM_0377	23	8	10	28	21	9	4	0	8	19	8	9	32	24	9	4	0	8	12.55	12	22	4	1.715	0.778	0.214573065763301	0.26248307824871
CUT_GIM_0378	678	473	590	193	66	164	484	622	519	561	492	516	222	75	161	489	506	507	392.36	523	153	501	0.285	-1.809	1.35390920339588e-09	3.74923766608632e-09
CUT_GIM_0379	49	47	47	253	186	491	137	161	148	41	49	41	292	212	483	138	131	145	170.03	44	329	138	7.023	2.812	3.32086227712022e-20	1.8322755698974e-19
CUT_GIM_0380	28	34	14	85	72	101	35	29	31	23	35	12	98	82	99	35	24	30	48.8	23	93	30	3.895	1.962	4.17188130595689e-07	9.63871192989566e-07
CUT_GIM_0381	7	4	8	13	9	17	11	9	6	6	4	7	15	10	17	11	7	6	9.24	6	14	8	2.245	1.167	0.0414186134309462	0.0578346178222054
CUT_GIM_0382	1	0	2	10	3	6	0	0	1	1	0	2	12	3	6	0	0	1	2.71	1	7	0	4.908	2.295	0.0203255907405879	0.0297203270013151
CUT_GIM_0383	5	6	4	6	9	2	1	6	1	4	6	4	7	10	2	1	5	1	4.43	5	6	2	1.179	0.238	0.732505334209249	0.775016508426373
CUT_GIM_0384	0	0	0	1	2	4	0	0	0	0	0	0	1	2	4	0	0	0	0.82	0	2	0	2.885	1.528	0.158710561166495	0.199515019125609
CUT_GIM_0385	17	9	19	36	17	34	8	11	9	14	9	17	41	19	33	8	9	9	17.79	13	31	9	2.198	1.136	0.0104498587449157	0.0158531804872239
CUT_GIM_0386	12	8	10	43	39	46	28	26	24	10	8	9	50	44	45	28	21	23	26.56	9	46	24	4.882	2.288	3.52910524223033e-08	8.8671519803706e-08
CUT_GIM_0387	2	1	2	4	3	5	1	1	2	2	1	2	5	3	5	1	1	2	2.35	2	4	1	2.233	1.159	0.185051985601506	0.229396149754875
CUT_GIM_0388	497	416	473	874	1002	648	363	392	388	412	433	414	1007	1140	637	367	319	379	567.44	420	928	355	2.147	1.102	4.88275284041427e-06	1.03369292922249e-05
CUT_GIM_0389	22	13	21	41	18	44	11	12	10	18	14	18	47	20	43	11	10	10	21.3	17	37	10	2.061	1.043	0.0112939880851984	0.0170430713796007
CUT_GIM_0390	34	19	40	181	60	143	51	42	39	28	20	35	209	68	141	52	34	38	69.34	28	139	41	4.608	2.204	7.49041397753273e-11	2.27358383744020e-10
CUT_GIM_0391	3	7	5	0	0	1	0	2	2	2	7	4	0	0	1	0	2	2	2.08	4	0	1	0.199	-2.326	0.0279948783875121	0.0401425854728305
CUT_GIM_0392	537	435	522	193	479	663	394	445	437	445	453	457	222	545	652	398	362	427	440.04	452	473	396	0.992	-0.012	0.967236730077531	0.973652203263505
CUT_GIM_0393	22	17	20	142	54	154	26	46	18	18	18	18	164	61	151	26	37	18	56.79	18	125	27	6.45	2.689	8.8575409550528e-10	2.48880075981599e-09
CUT_GIM_0394	33	28	23	327	103	220	52	65	67	27	29	20	377	117	216	53	53	65	106.41	25	237	57	8.208	3.037	1.87977677143021e-15	7.86223026160825e-15
CUT_GIM_0395	1	0	4	0	2	6	4	0	3	1	0	4	0	2	6	4	0	3	2.16	2	3	2	1.756	0.812	0.415224701296496	0.47461916593121
CUT_GIM_0396	6	5	6	70	43	57	15	11	15	5	5	5	81	49	56	15	9	15	26.64	5	62	13	10.723	3.423	1.0225850161334e-12	3.53443611314253e-12
CUT_GIM_0397	39	28	38	22	14	22	23	20	24	32	29	33	25	16	22	23	16	23	24.51	31	21	21	0.678	-0.56	0.129701976433552	0.166194879013431
CUT_GIM_0398	0	0	0	0	0	0	0	0	0	0	0	0	0	0	0	0	0	0	0	0	0	0	1	0	NA	NA
CUT_GIM_0399	174	121	150	1916	489	855	411	513	453	144	126	131	2208	556	840	415	417	443	586.77	134	1201	425	7.603	2.927	1.23986521746002e-16	5.5492397285476e-16
CUT_GIM_0400	0	0	2	0	0	0	0	0	1	0	0	2	0	0	0	0	0	1	0.3	1	0	0	0.856	-0.224	0.809520620544775	NA
CUT_GIM_0401	12	5	6	5	5	6	10	5	7	10	5	5	6	6	6	10	4	7	6.53	7	6	7	0.905	-0.144	0.812154988404541	0.845509415990687
CUT_GIM_0402	2	0	0	12	9	7	3	2	2	2	0	0	14	10	7	3	2	2	4.36	1	10	2	9.584	3.261	0.000912259891748369	0.00156246066172819
CUT_GIM_0403	2	2	5	6	3	7	6	1	4	2	2	4	7	3	7	6	1	4	4.01	3	6	4	1.807	0.854	0.263689476720119	0.315983923805508
CUT_GIM_0404	1	2	2	4	0	3	1	2	1	1	2	2	5	0	3	1	2	1	1.76	2	3	1	1.317	0.397	0.672405309464446	0.721355774020152
CUT_GIM_0405	7	5	7	32	9	18	6	6	8	6	5	6	37	10	18	6	5	8	11.19	6	22	6	3.177	1.668	0.00407859818774097	0.00650150026216628
CUT_GIM_0406	4	0	6	21	18	26	16	12	8	3	0	5	24	20	26	16	10	8	12.5	3	23	11	6.984	2.804	1.75603663863805e-05	3.54422178914062e-05
CUT_GIM_0407	184	122	183	81	70	58	109	114	116	152	127	160	93	80	57	110	93	113	109.53	146	77	105	0.53	-0.916	0.000510116412633914	0.000895750623296758
CUT_GIM_0408	0	0	2	0	0	0	0	1	0	0	0	2	0	0	0	0	1	0	0.28	1	0	0	0.826	-0.276	0.766480359446738	NA
CUT_GIM_0409	17	16	12	143	34	74	24	27	27	14	17	11	165	39	73	24	22	26	43.33	14	92	24	5.625	2.492	7.22060715526206e-08	1.76675073736165e-07
CUT_GIM_0410	3	6	3	6	4	12	11	5	1	2	6	3	7	5	12	11	4	1	5.64	4	8	5	1.847	0.885	0.242216214301495	0.292743683972207
CUT_GIM_0411	0	1	5	3	1	7	0	0	2	0	1	4	3	1	7	0	0	2	2.09	2	4	1	2.027	1.019	0.295614083621463	0.350111095692755
CUT_GIM_0412	31	30	23	6	9	5	24	17	31	26	31	20	7	10	5	24	14	30	18.61	26	7	23	0.31	-1.689	0.00147989904840826	0.00248121955232409
CUT_GIM_0413	59	38	48	32	39	88	65	55	70	49	40	42	37	44	86	66	45	68	53	44	56	60	1.22	0.287	0.390271281996004	0.449331054325646
CUT_GIM_0414	0	3	5	2	3	2	1	1	3	0	3	4	2	3	2	1	1	3	2.22	2	2	2	1.215	0.281	0.753135979078108	0.793467999594912
CUT_GIM_0415	19	12	21	8	10	4	12	9	7	16	12	18	9	11	4	12	7	7	10.82	15	8	9	0.547	-0.871	0.112491870148908	0.145789064495967
CUT_GIM_0416	239	117	109	216	150	123	61	81	68	198	122	95	249	171	121	62	66	66	127.72	138	180	65	1.287	0.364	0.177347990998957	0.220454060505671
CUT_GIM_0417	345	223	283	211	549	482	227	271	224	286	232	248	243	624	474	229	221	219	308.39	255	447	223	1.648	0.72	0.017055209799488	0.0252255640699679
CUT_GIM_0418	266	160	244	354	192	197	227	212	257	220	167	214	408	218	194	229	173	251	230.36	200	273	218	1.311	0.39	0.134993916117392	0.17242746789243
CUT_GIM_0419	35	20	38	780	155	248	42	53	41	29	21	33	899	176	244	42	43	40	169.72	28	440	42	12.084	3.595	6.73828404652412e-17	3.06872904784415e-16
CUT_GIM_0420	34	26	33	39	22	23	24	38	30	28	27	29	45	25	23	24	31	29	29.02	28	31	28	1.071	0.1	0.789242292526314	0.825110523390812
CUT_GIM_0421	5	2	5	1	0	0	3	4	6	4	2	4	1	0	0	3	3	6	2.66	3	0	4	0.235	-2.092	0.0436829940947565	0.060713542934268
CUT_GIM_0422	2	1	3	9	3	9	5	1	1	2	1	3	10	3	9	5	1	1	3.87	2	7	2	3.13	1.646	0.0485902889173876	0.067079281309934
CUT_GIM_0423	16	13	14	56	14	22	16	13	11	13	14	12	65	16	22	16	11	11	19.84	13	34	13	2.153	1.107	0.0200449447032033	0.0293466830119811
CUT_GIM_0424	434	388	410	226	177	170	335	455	341	359	404	359	260	201	167	338	370	333	310.32	374	209	347	0.563	-0.83	0.000114085791428764	0.000213826232339461
CUT_GIM_0425	627	560	670	5132	3293	3454	1154	1383	1268	519	583	586	5913	3745	3394	1166	1126	1239	2030.23	563	4351	1177	7.422	2.892	7.91272199106836e-34	9.62206755334286e-33
CUT_GIM_0426	36	19	18	232	91	184	54	78	62	30	20	16	267	103	181	55	63	61	88.4	22	184	60	7.836	2.97	3.33791438006465e-16	1.46257470736541e-15
CUT_GIM_0427	10	1	10	81	27	58	10	13	13	8	1	9	93	31	57	10	11	13	25.83	6	60	11	8.836	3.143	1.89215824706685e-09	5.17961144886934e-09
CUT_GIM_0428	2705	2309	2865	650	1263	709	2305	2691	2492	2240	2403	2507	749	1436	697	2329	2190	2436	1887.47	2383	961	2318	0.397	-1.334	4.01339456080045e-07	9.2872334331711e-07
CUT_GIM_0429	1	0	1	2	0	1	0	0	2	1	0	1	2	0	1	0	0	2	0.77	1	1	1	1.295	0.373	0.726241256028643	0.769433845689095
CUT_GIM_0430	77	60	78	496	159	347	175	151	166	64	62	68	572	181	341	177	123	162	194.42	65	365	154	5.029	2.33	5.79875723903349e-14	2.18876864003054e-13
CUT_GIM_0431	223180	163492	200832	50494	66264	61458	139943	167655	148327	184827	170167	175768	58182	75360	60398	141384	136443	144965	127499.47	176921	64647	140931	0.367	-1.446	5.13133208133835e-16	2.22338697450945e-15
CUT_GIM_0432	1	1	1	13	6	9	3	2	2	1	1	1	15	7	9	3	2	2	4.45	1	10	2	6.918	2.79	0.00197381167320218	0.00326020681456405
CUT_GIM_0433	24	11	19	38	30	28	11	13	13	20	11	17	44	34	28	11	11	13	20.86	16	35	12	2.093	1.066	0.00954588526274525	0.0145459923302179
CUT_GIM_0434	22	16	18	92	24	36	11	9	9	18	17	16	106	27	35	11	7	9	27.39	17	56	9	2.762	1.466	0.000996405416663721	0.0017001012847324
CUT_GIM_0435	24	10	25	456	76	163	35	44	27	20	10	22	525	86	160	35	36	26	102.42	17	257	32	11.145	3.478	5.23852282851495e-14	1.98499927931341e-13
CUT_GIM_0436	1	0	1	0	1	0	0	1	0	1	0	1	0	1	0	0	1	0	0.41	1	0	0	0.804	-0.314	0.759039189489699	0.798176187202072
CUT_GIM_0437	379	244	349	59	97	145	323	393	304	314	254	305	68	110	142	326	320	297	237.48	291	107	314	0.369	-1.438	1.75839201216122e-07	4.1858191809688e-07
CUT_GIM_0438	154	105	117	90	63	68	69	127	91	128	109	102	104	72	67	70	103	89	93.71	113	81	87	0.722	-0.471	0.0924871019491019	0.121534271154527
CUT_GIM_0439	414	288	412	155	211	186	291	315	335	343	300	361	179	240	183	294	256	327	275.81	335	201	292	0.608	-0.718	0.00146357781073457	0.00245455945698109
CUT_GIM_0440	89	57	80	3243	407	877	76	64	62	74	59	70	3737	463	862	77	52	61	606	68	1687	63	16.495	4.044	2.82968190545405e-21	1.65752695474366e-20
CUT_GIM_0441	0	1	0	0	2	1	0	0	0	0	1	0	0	2	1	0	0	0	0.48	0	1	0	1.344	0.427	0.671866392086284	0.720909986036206
CUT_GIM_0442	4	3	5	8	12	28	6	9	8	3	3	4	9	14	28	6	7	8	9.16	3	17	7	3.858	1.948	0.00204391128582416	0.00336790006854781
CUT_GIM_0443	14	12	12	10	0	11	4	11	10	12	12	11	12	0	11	4	9	10	8.85	12	8	8	0.645	-0.632	0.348105291205088	0.405215502841185
CUT_GIM_0444	22	18	13	42	16	38	40	51	47	18	19	11	48	18	37	40	42	46	31.12	16	34	43	2.009	1.006	0.0165577389432873	0.0245363602956194
CUT_GIM_0445	4288	3381	3965	2380	2231	1922	3349	4221	3437	3551	3519	3470	2742	2537	1889	3383	3435	3359	3098.51	3513	2389	3392	0.68	-0.557	0.00223160662360222	0.00366220404485543
CUT_GIM_0446	10	14	17	14	16	25	10	12	9	8	15	15	16	18	25	10	10	9	13.92	13	20	10	1.508	0.592	0.19557284336578	0.241108159887383
CUT_GIM_0447	597	469	527	2631	2230	3873	725	850	745	494	488	461	3032	2536	3806	732	692	728	1441.12	481	3125	717	6.343	2.665	1.4757652181083e-41	2.70770368845554e-40
CUT_GIM_0448	1	1	4	1	0	0	1	1	2	1	1	4	1	0	0	1	1	2	1.14	2	0	1	0.454	-1.14	0.280640187813841	0.3342739001929
CUT_GIM_0449	28	17	22	140	81	120	34	23	32	23	18	19	161	92	118	34	19	31	57.32	20	124	28	5.911	2.564	6.60682774822623e-16	2.84268737355566e-15
CUT_GIM_0450	4	5	7	14	15	20	6	6	4	3	5	6	16	17	20	6	5	4	9.15	5	18	5	3.261	1.705	0.00391821532714777	0.00625859288791517
CUT_GIM_0451	56	36	41	52	28	61	51	42	36	46	37	36	60	32	60	52	34	35	43.59	40	51	40	1.234	0.303	0.340354060017037	0.397023112932631
CUT_GIM_0452	1	3	2	3	1	9	8	11	14	1	3	2	3	1	9	8	9	14	5.54	2	4	10	1.884	0.914	0.244452391253258	0.295263115678096
CUT_GIM_0453	1	2	3	1	3	6	0	0	1	1	2	3	1	3	6	0	0	1	1.89	2	3	0	1.488	0.573	0.530726040060679	0.587261102561225
CUT_GIM_0454	0	0	0	0	0	0	0	0	0	0	0	0	0	0	0	0	0	0	0	0	0	0	1	0	NA	NA
CUT_GIM_0455	0	1	1	0	0	0	1	3	0	0	1	1	0	0	0	1	2	0	0.6	1	0	1	0.677	-0.564	0.592377694274521	0.646360946339128
CUT_GIM_0456	2	4	5	4	12	24	3	5	5	2	4	4	5	14	24	3	4	5	7.11	3	14	4	3.319	1.731	0.0107680700672119	0.0163020685069877
CUT_GIM_0457	14	12	13	10	19	24	17	14	13	12	12	11	12	22	24	17	11	13	14.83	12	19	14	1.515	0.599	0.202886323755827	0.249387775261448
CUT_GIM_0458	13	2	6	4	4	3	4	6	5	11	2	5	5	5	3	4	5	5	4.89	6	4	5	0.758	-0.4	0.56759964117848	0.622580195871195
CUT_GIM_0459	9	10	18	109	76	115	34	40	33	7	10	16	126	86	113	34	33	32	50.87	11	108	33	9.136	3.192	6.82702483486611e-17	3.10551234800488e-16
CUT_GIM_0460	42	25	35	69	19	45	35	54	37	35	26	31	80	22	44	35	44	36	39.14	31	49	38	1.454	0.54	0.172926163253198	0.215575253316626
CUT_GIM_0461	64	43	55	31	26	38	67	87	59	53	45	48	36	30	37	68	71	58	49.41	49	34	66	0.719	-0.477	0.11619501582195	0.150088974786703
CUT_GIM_0462	9	8	11	553	129	337	37	41	31	7	8	10	637	147	331	37	33	30	137.95	8	372	33	34.305	5.1	1.53209913610968e-29	1.45561874020957e-28
CUT_GIM_0463	36	33	37	31	15	23	33	38	35	30	34	32	36	17	23	33	31	34	30.04	32	25	33	0.783	-0.353	0.335772037099361	0.392383202554313
CUT_GIM_0464	1	0	2	0	0	3	0	0	0	1	0	2	0	0	3	0	0	0	0.61	1	1	0	0.951	-0.073	0.94388908916985	0.954590038601373
CUT_GIM_0465	2	1	1	1	0	0	1	1	1	2	1	1	1	0	0	1	1	1	0.84	1	0	1	0.564	-0.827	0.435941274241343	0.495324232453509
CUT_GIM_0466	0	0	1	4	2	1	0	0	0	0	0	1	5	2	1	0	0	0	0.97	0	3	0	2.692	1.429	0.19090523558723	0.235851420136628
CUT_GIM_0467	30	22	26	221	118	334	96	109	127	25	23	23	255	134	328	97	89	124	121.93	24	239	103	9.341	3.224	3.56922322307431e-24	2.49760135238601e-23
CUT_GIM_0468	35	18	23	56	35	76	24	33	28	29	19	20	65	40	75	24	27	27	36.15	23	60	26	2.521	1.334	0.000245728869015436	0.000445138360457973
CUT_GIM_0469	111	75	73	12	28	24	50	58	47	92	78	64	14	32	24	51	47	46	49.64	78	23	48	0.305	-1.711	1.85663122817576e-06	4.06151114422723e-06
CUT_GIM_0470	0	1	1	2	2	1	1	0	0	0	1	1	2	2	1	1	0	0	0.94	1	2	0	1.715	0.778	0.460487536004988	0.51912573275654
CUT_GIM_0471	16	23	23	210	83	181	45	27	39	13	24	20	242	94	178	45	22	38	75.24	19	171	35	7.89	2.98	3.20407991990188e-14	1.23207890569179e-13
CUT_GIM_0472	2	1	1	1	0	1	0	0	0	2	1	1	1	0	1	0	0	0	0.63	1	1	0	0.77	-0.377	0.723996322461132	0.767472879561029
CUT_GIM_0473	18	9	8	5	1	21	13	13	6	15	9	7	6	1	21	13	11	6	9.82	10	9	10	0.823	-0.281	0.673008331851635	0.72180390657289
CUT_GIM_0474	2	2	2	27	6	22	6	4	3	2	2	2	31	7	22	6	3	3	8.59	2	20	4	7.642	2.934	9.65826443688172e-05	0.000182189633913478
CUT_GIM_0475	1	1	0	0	1	1	1	3	2	1	1	0	0	1	1	1	2	2	1.04	1	1	2	1.063	0.089	0.932352402741684	0.945951569581466
CUT_GIM_0476	9457	8084	9230	4558	5259	4603	7593	9261	7979	7832	8414	8078	5252	5981	4524	7671	7537	7798	7009.64	8108	5252	7669	0.65	-0.621	0.00023408859404633	0.000425304619095991
CUT_GIM_0477	8	4	2	12	9	14	11	7	9	7	4	2	14	10	14	11	6	9	8.44	4	13	9	2.775	1.473	0.018994222467811	0.0279168008752156
CUT_GIM_0478	0	0	0	2	0	0	0	0	0	0	0	0	2	0	0	0	0	0	0.26	0	1	0	1.302	0.381	0.682114139621401	NA
CUT_GIM_0479	126	98	102	81	86	71	61	80	59	104	102	89	93	98	70	62	65	58	82.33	98	87	62	0.882	-0.182	0.45152514566291	0.510400740202821
CUT_GIM_0480	17	16	22	8	5	9	10	14	11	14	17	19	9	6	9	10	11	11	11.78	17	8	11	0.512	-0.966	0.0590786725201537	0.0803436945270005
CUT_GIM_0481	31	36	41	140	69	155	54	101	87	26	37	36	161	78	152	55	82	85	79.21	33	130	74	3.823	1.935	6.55712459880785e-08	1.60980163995102e-07
CUT_GIM_0482	62	46	55	246	102	204	85	88	82	51	48	48	283	116	200	86	72	80	109.44	49	200	79	3.818	1.933	7.75105320838123e-11	2.34842644006075e-10
CUT_GIM_0483	24	20	22	32	20	40	30	21	20	20	21	19	37	23	39	30	17	20	25.09	20	33	22	1.573	0.653	0.0901541217495747	0.118682107329676
CUT_GIM_0484	1	0	1	0	1	1	1	0	0	1	0	1	0	1	1	1	0	0	0.54	1	1	0	1.17	0.227	0.830762664160072	0.860893189090592
CUT_GIM_0485	99	91	122	407	275	479	198	181	175	82	95	107	469	313	471	200	147	171	228.26	95	418	173	4.294	2.102	1.08268349107467e-18	5.4371462297802e-18
CUT_GIM_0486	4	0	2	49	31	50	9	14	14	3	0	2	56	35	49	9	11	14	20.01	2	47	11	19.897	4.314	1.29459085465205e-10	3.85539977764116e-10
CUT_GIM_0487	14	12	9	42	22	38	16	28	29	12	12	8	48	25	37	16	23	28	23.34	11	37	22	3.238	1.695	0.000251441651142894	0.000454922919222149
CUT_GIM_0488	498	439	391	90	61	95	240	287	335	412	457	342	104	69	93	242	234	327	253.49	404	89	268	0.222	-2.169	3.07942383064615e-16	1.35388062020056e-15
CUT_GIM_0489	65	40	53	640	654	952	126	150	128	54	42	46	737	744	936	127	122	125	325.9	47	806	125	16.5	4.044	1.83313740087173e-68	1.50859462440753e-66
CUT_GIM_0490	24	22	22	16	14	12	17	18	19	20	23	19	18	16	12	17	15	19	17.62	21	15	17	0.762	-0.392	0.350599144803559	0.407793531021637
CUT_GIM_0491	116	70	90	235	167	180	89	79	77	96	73	79	271	190	177	90	64	75	123.86	83	213	76	2.52	1.333	6.24102896070028e-09	1.64782341696212e-08
CUT_GIM_0492	0	1	1	69	36	33	8	4	4	0	1	1	80	41	32	8	3	4	18.89	1	51	5	35.519	5.151	1.33731615468095e-08	3.45596563104855e-08
CUT_GIM_0493	0	1	1	0	0	0	0	0	0	0	1	1	0	0	0	0	0	0	0.21	1	0	0	0.792	-0.336	0.717804129058344	NA
CUT_GIM_0494	45	37	31	224	70	70	34	35	35	37	39	27	258	80	69	34	28	34	67.38	34	136	32	3.326	1.734	1.56493907611048e-05	3.17649372522598e-05
CUT_GIM_0495	103	67	81	27	25	42	46	67	61	85	70	71	31	28	41	46	55	60	54.15	75	33	54	0.456	-1.134	0.000262363575094686	0.00047416961623206
CUT_GIM_0496	12	9	12	9	9	12	6	8	6	10	9	11	10	10	12	6	7	6	8.96	10	11	6	1.074	0.103	0.840562965816921	0.869199081367715
CUT_GIM_0497	810	478	453	233	276	190	352	426	373	671	498	396	268	314	187	356	347	365	377.86	522	256	356	0.5	-1	3.20657705604064e-05	6.33937734340905e-05
CUT_GIM_0498	0	0	0	0	0	0	0	0	0	0	0	0	0	0	0	0	0	0	0	0	0	0	1	0	NA	NA
CUT_GIM_0499	43	12	22	252	48	69	31	25	20	36	12	19	290	55	68	31	20	20	61.26	22	138	24	4.981	2.316	5.91226577143322e-09	1.56420053893975e-08
CUT_GIM_0500	39	27	27	39	19	27	21	27	30	32	28	24	45	22	27	21	22	29	27.74	28	31	24	1.078	0.108	0.773947566859293	0.811225335574285
CUT_GIM_0501	5	3	4	1	3	5	2	3	1	4	3	4	1	3	5	2	2	1	2.85	4	3	2	0.891	-0.166	0.833861686207762	0.863492039434994
CUT_GIM_0502	3	2	1	6	4	6	1	1	0	2	2	1	7	5	6	1	1	0	2.74	2	6	1	2.577	1.366	0.113217195691957	0.146647766443828
CUT_GIM_0503	23	14	14	43	18	21	13	15	15	19	15	12	50	20	21	13	12	15	19.61	15	30	13	1.802	0.85	0.0504840492398309	0.0694638642901995
CUT_GIM_0504	3	0	0	35	26	34	6	10	2	2	0	0	40	30	33	6	8	2	13.55	1	34	5	23.177	4.535	1.33784227333072e-07	3.20632174039023e-07
CUT_GIM_0505	4	5	5	74	23	76	3	5	1	3	5	4	85	26	75	3	4	1	23.01	4	62	3	11.417	3.513	1.08170260277698e-08	2.80935210251129e-08
CUT_GIM_0506	6	6	7	0	0	1	4	0	8	5	6	6	0	0	1	4	0	8	3.35	6	0	4	0.145	-2.785	0.00833060365869607	0.0127590346468574
CUT_GIM_0507	579	393	498	90	47	42	319	410	356	480	409	436	104	53	41	322	334	348	280.75	442	66	335	0.149	-2.75	2.79270714639303e-21	1.63668885219403e-20
CUT_GIM_0508	3	2	4	1	0	1	5	3	4	2	2	4	1	0	1	5	2	4	2.4	3	1	4	0.397	-1.334	0.17164108620797	0.214203089857576
CUT_GIM_0509	22	16	20	36	25	74	47	40	36	18	17	18	41	28	73	47	33	35	34.47	18	47	38	2.526	1.337	0.000844288682454264	0.00145093493281772
CUT_GIM_0510	8	6	6	22	7	14	9	8	12	7	6	5	25	8	14	9	7	12	10.28	6	16	9	2.241	1.164	0.040995072448126	0.0572705817846743
CUT_GIM_0511	3	0	0	2	1	1	3	0	1	2	0	0	2	1	1	3	0	1	1.21	1	1	1	1.761	0.816	0.433191594459381	0.492583144191138
CUT_GIM_0512	1	2	4	5	3	4	1	4	1	1	2	4	6	3	4	1	3	1	2.75	2	4	2	1.782	0.833	0.322315843035358	0.377981228470767
CUT_GIM_0513	4	4	5	0	0	2	4	2	4	3	4	4	0	0	2	4	2	4	2.6	4	1	3	0.273	-1.875	0.0620510338182386	0.0841021086986705
CUT_GIM_0514	103	70	99	107	75	75	82	120	73	85	73	87	123	85	74	83	98	71	86.55	82	94	84	1.125	0.17	0.53383475507221	0.59036556712159
CUT_GIM_0515	14	7	5	7	4	5	1	1	9	12	7	4	8	5	5	1	1	9	5.71	8	6	4	0.778	-0.363	0.616573571984829	0.669511128248904
CUT_GIM_0516	7	6	9	10	11	16	1	8	3	6	6	8	12	13	16	1	7	3	7.79	7	14	4	1.813	0.859	0.148664384410376	0.187977926446619
CUT_GIM_0517	3	3	9	4	8	2	4	2	1	2	3	8	5	9	2	4	2	1	3.98	4	5	2	1.057	0.08	0.917009433077476	0.933545799716298
CUT_GIM_0518	51	35	35	468	187	294	66	89	66	42	36	31	539	213	289	67	72	65	150.42	36	347	68	8.767	3.132	1.40544462203195e-22	8.90673853203114e-22
CUT_GIM_0519	17	8	14	29	8	9	4	14	11	14	8	12	33	9	9	4	11	11	12.47	11	17	9	1.307	0.386	0.501075356639994	0.558364319414033
CUT_GIM_0520	7	3	4	37	21	45	11	18	7	6	3	4	43	24	44	11	15	7	17.31	4	37	11	7.726	2.95	2.97844793172498e-07	6.96819670273036e-07
CUT_GIM_0521	11	4	4	16	7	14	1	12	8	9	4	4	18	8	14	1	10	8	8.39	6	13	6	2.081	1.057	0.122644659770676	0.157861603048807
CUT_GIM_0522	54	20	27	62	43	119	41	29	25	45	21	24	71	49	117	41	24	24	46.21	30	79	30	2.601	1.379	0.000353291570286835	0.000630604137829838
CUT_GIM_0523	0	1	0	0	1	1	0	0	0	0	1	0	0	1	1	0	0	0	0.35	0	1	0	1.199	0.262	0.784906013123018	0.821091367769724
CUT_GIM_0524	102	46	55	75	58	118	47	38	56	84	48	48	86	66	116	47	31	55	64.66	60	89	44	1.453	0.539	0.0803037565560131	0.10690700605076
CUT_GIM_0525	2	3	2	0	3	1	1	2	0	2	3	2	0	3	1	1	2	0	1.51	2	1	1	0.676	-0.565	0.562158402649047	0.617539301875988
CUT_GIM_0526	288	271	391	67	38	65	385	420	305	239	282	342	77	43	64	389	342	298	230.66	288	61	343	0.216	-2.21	3.65286751681886e-15	1.49832958236382e-14
CUT_GIM_0527	0	1	1	11	1	2	0	1	0	0	1	1	13	1	2	0	1	0	2.06	1	5	0	3.339	1.74	0.0965281085049112	0.12653140504637
CUT_GIM_0528	28	19	30	43	27	82	9	10	15	23	20	26	50	31	81	9	8	15	29.11	23	54	11	2.135	1.094	0.00322095808170831	0.0051924563585106
CUT_GIM_0529	0	2	8	7	15	19	2	2	1	0	2	7	8	17	19	2	2	1	6.39	3	15	2	4.436	2.149	0.0056768027433749	0.00888906831824723
CUT_GIM_0530	1	1	3	2	2	3	0	2	1	1	1	3	2	2	3	0	2	1	1.63	2	2	1	1.48	0.566	0.543530208637842	0.59972561780208
CUT_GIM_0531	15	6	17	5	1	4	13	14	17	12	6	15	6	1	4	13	11	17	9.5	11	4	14	0.363	-1.462	0.0232013066423683	0.0336808036549958
CUT_GIM_0532	4	3	4	0	1	0	4	1	4	3	3	4	0	1	0	4	1	4	2.2	3	0	3	0.249	-2.004	0.0561373400535447	0.0766290101466795
CUT_GIM_0533	81	65	87	199	75	138	57	61	53	67	68	76	229	85	136	58	50	52	91.12	70	150	53	1.969	0.977	0.00184444104925159	0.00305559088482479
CUT_GIM_0534	0	1	0	0	0	0	0	0	0	0	1	0	0	0	0	0	0	0	0.12	0	0	0	0.895	-0.16	0.862904570881275	NA
CUT_GIM_0535	10	4	9	1	1	1	4	11	3	8	4	8	1	1	1	4	9	3	4.39	7	1	5	0.234	-2.096	0.0208778732915147	0.030470691555469
CUT_GIM_0536	0	1	1	5	2	1	0	0	1	0	1	1	6	2	1	0	0	1	1.32	1	3	0	2.565	1.359	0.198881720955187	0.244800062258512
CUT_GIM_0537	2	1	2	17	6	9	0	3	5	2	1	2	20	7	9	0	2	5	5.23	2	12	2	5.432	2.442	0.00498686850079376	0.00786458101218298
CUT_GIM_0538	35	24	21	51	44	34	21	23	11	29	25	18	59	50	33	21	19	11	29.47	24	47	17	1.89	0.918	0.0079477040032562	0.0122302961524956
CUT_GIM_0539	2	0	0	0	0	1	0	2	0	2	0	0	0	0	1	0	2	0	0.47	1	0	1	0.946	-0.08	0.935265670814697	0.948001962801679
CUT_GIM_0540	65	41	39	55	27	40	49	47	47	54	43	34	63	31	39	50	38	46	44.19	44	44	45	1.004	0.006	0.985826844155396	0.987601586009426
CUT_GIM_0541	20	9	19	12	37	23	7	13	7	17	9	17	14	42	23	7	11	7	16.17	14	26	8	1.598	0.676	0.168166241425052	0.21018082323991
CUT_GIM_0542	6	3	5	18	10	18	7	7	15	5	3	4	21	11	18	7	6	15	9.97	4	17	9	3.534	1.821	0.00266759922644966	0.00434111747114479
CUT_GIM_0543	9	10	8	8	2	17	10	13	7	7	10	7	9	2	17	10	11	7	8.95	8	9	9	1.072	0.101	0.868531204250759	0.892717426192295
CUT_GIM_0544	6	4	4	6	7	23	3	12	3	5	4	4	7	8	23	3	10	3	7.32	4	13	5	2.395	1.26	0.0705523815629513	0.0947890470159403
CUT_GIM_0545	19	5	15	8	8	9	8	8	13	16	5	13	9	9	9	8	7	13	9.84	11	9	9	0.856	-0.224	0.673517097595557	0.722283270854518
CUT_GIM_0546	15	11	7	0	1	1	0	3	4	12	11	6	0	1	1	0	2	4	4.27	10	1	2	0.13	-2.948	0.00320873255353216	0.00517417533056118
CUT_GIM_0547	7	2	10	2	3	2	5	5	8	6	2	9	2	3	2	5	4	8	4.58	6	2	6	0.571	-0.809	0.279883155900998	0.333508163542272
CUT_GIM_0548	6	8	1	2	2	3	2	3	1	5	8	1	2	2	3	2	2	1	3.02	5	2	2	0.731	-0.453	0.575034621095923	0.629579538489474
CUT_GIM_0549	1056	668	645	915	622	509	513	637	537	875	695	565	1054	707	500	518	518	525	661.97	712	754	520	1.038	0.053	0.816343860857594	0.848863746234288
CUT_GIM_0550	13	29	27	120	38	90	19	28	14	11	30	24	138	43	88	19	23	14	43.35	22	90	19	3.852	1.946	7.47276503983698e-05	0.000142388280214471
CUT_GIM_0551	21	16	15	24	17	20	20	18	11	17	17	13	28	19	20	20	15	11	17.71	16	22	15	1.367	0.451	0.273604905423882	0.326593148598926
CUT_GIM_0552	2	3	2	28	10	24	4	5	3	2	3	2	32	11	24	4	4	3	9.42	2	22	4	7.89	2.98	3.48708489434122e-05	6.86606134376942e-05
CUT_GIM_0553	11	9	11	958	354	714	35	42	48	9	9	10	1104	403	702	35	34	47	261.41	9	736	39	66.409	6.053	1.09185241403203e-53	3.62482594044838e-52
CUT_GIM_0554	1	2	0	0	0	2	0	0	0	1	2	0	0	0	2	0	0	0	0.54	1	1	0	0.813	-0.299	0.767970617347289	0.806044964462046
CUT_GIM_0555	5	5	3	2	11	4	6	9	11	4	5	3	2	13	4	6	7	11	6.09	4	6	8	1.314	0.394	0.564394034636419	0.619645686655505
CUT_GIM_0556	2	2	6	6	3	11	4	1	4	2	2	5	7	3	11	4	1	4	4.32	3	7	3	2.01	1.007	0.176036975146659	0.219080733925863
CUT_GIM_0557	7	1	1	2	6	5	3	0	3	6	1	1	2	7	5	3	0	3	3.08	3	5	2	1.909	0.933	0.294123487222604	0.348451649602935
CUT_GIM_0558	9	3	5	49	10	14	7	5	5	7	3	4	56	11	14	7	4	5	12.51	5	27	5	4.236	2.083	0.000457467398795561	0.000807425467803191
CUT_GIM_0559	86	61	76	343	150	191	83	87	90	71	63	67	395	171	188	84	71	88	133.04	67	251	81	3.476	1.798	1.68144896743727e-09	4.61687326914283e-09
CUT_GIM_0560	13	14	11	7	3	4	8	6	7	11	15	10	8	3	4	8	5	7	7.8	12	5	7	0.477	-1.069	0.0825597145004186	0.109585736443877
CUT_GIM_0561	9	5	10	4	0	3	1	5	2	7	5	9	5	0	3	1	4	2	4	7	3	2	0.431	-1.214	0.141808686039035	0.180088709525339
CUT_GIM_0562	16	10	9	33	5	9	13	13	16	13	10	8	38	6	9	13	11	16	13.72	10	18	13	1.333	0.414	0.450090589808349	0.509173149322398
CUT_GIM_0563	6	4	9	439	28	104	12	10	11	5	4	8	506	32	102	12	8	11	76.43	6	213	10	19.799	4.307	1.17365639509895e-12	4.03155456588076e-12
CUT_GIM_0564	84	69	66	594	147	315	95	78	103	70	72	58	684	167	310	96	63	101	180.05	67	387	87	4.901	2.293	3.26830044961273e-10	9.43978226746772e-10
CUT_GIM_0565	26	24	34	67	58	71	23	28	30	22	25	30	77	66	70	23	23	29	40.51	26	71	25	2.732	1.45	1.00527816553472e-05	2.072266827031e-05
CUT_GIM_0566	94	78	78	1123	251	543	105	91	122	78	81	68	1294	285	534	106	74	119	293.31	76	704	100	7.548	2.916	1.0218541451696e-14	4.08811624116809e-14
CUT_GIM_0567	0	2	1	0	0	2	1	0	0	0	2	1	0	0	2	1	0	0	0.66	1	1	0	0.818	-0.289	0.784808374609192	0.821062727455955
CUT_GIM_0568	57	39	49	63	31	95	22	32	37	47	41	43	73	35	93	22	26	36	46.26	44	67	28	1.432	0.519	0.128584634120252	0.164962129139232
CUT_GIM_0569	28	15	30	32	21	70	8	7	13	23	16	26	37	24	69	8	6	13	24.57	22	43	9	1.82	0.864	0.0244408265259205	0.0353484528195429
CUT_GIM_0570	2	0	0	1	1	2	0	1	2	2	0	0	1	1	2	0	1	2	0.96	1	1	1	1.63	0.705	0.506008539806121	0.563109779656635
CUT_GIM_0571	79	67	75	94	42	108	104	136	98	65	70	66	108	48	106	105	111	96	86.06	67	87	104	1.258	0.331	0.291849729035863	0.346038548448974
CUT_GIM_0572	1	2	9	0	3	0	2	1	1	1	2	8	0	3	0	2	1	1	2	4	1	1	0.458	-1.127	0.268352310797074	0.320946177870699
CUT_GIM_0573	21	20	25	232	90	138	20	24	36	17	21	22	267	102	136	20	20	35	71.15	20	168	25	7.552	2.917	3.69650507850304e-13	1.31498807754601e-12
CUT_GIM_0574	4	1	4	1	1	1	1	2	1	3	1	4	1	1	1	1	2	1	1.64	3	1	1	0.561	-0.834	0.381760679195386	0.440226494679029
CUT_GIM_0575	4271	3086	3667	4699	3445	1722	3130	3341	3709	3537	3212	3209	5414	3918	1692	3162	2719	3625	3387.7	3319	3675	3169	1.049	0.069	0.825085058531681	0.85630053232693
CUT_GIM_0576	0	0	0	1	0	0	0	0	0	0	0	0	1	0	0	0	0	0	0.13	0	0	0	1.208	0.273	0.768453330082103	NA
CUT_GIM_0577	17	10	9	35	5	12	15	16	18	14	10	8	40	6	12	15	13	18	15.1	11	19	15	1.45	0.536	0.31649129160586	0.372159109851689
CUT_GIM_0578	105533	78150	89367	26098	38240	32408	73308	88002	74758	87398	81341	78214	30072	43489	31849	74063	71619	73063	63456.41	82318	35137	72915	0.428	-1.226	2.17158170868928e-10	6.34269028936338e-10
CUT_GIM_0579	6	1	4	1	1	0	1	4	5	5	1	4	1	1	0	1	3	5	2.33	3	1	3	0.39	-1.357	0.174852274012407	0.217675900086182
CUT_GIM_0580	58	44	52	13	24	28	77	67	87	48	46	46	15	27	28	78	55	85	47.39	47	23	73	0.516	-0.956	0.00699530064006927	0.0108288625354152
CUT_GIM_0581	1	1	3	0	3	2	2	0	2	1	1	3	0	3	2	2	0	2	1.54	2	2	1	1.139	0.188	0.848564237945487	0.875613393786398
CUT_GIM_0582	48	28	32	28	22	37	17	35	36	40	29	28	32	25	36	17	28	35	30.15	32	31	27	0.959	-0.06	0.872951842545174	0.896582460184822
CUT_GIM_0583	215	150	182	286	190	247	210	210	188	178	156	159	330	216	243	212	171	184	205.4	164	263	189	1.564	0.645	0.00149230506018353	0.00250058459037923
CUT_GIM_0584	19	14	19	5	4	16	16	17	5	16	15	17	6	5	16	16	14	5	11.98	16	9	12	0.598	-0.741	0.205273356629589	0.252003828718707
CUT_GIM_0585	7	3	6	37	21	28	11	17	16	6	3	5	43	24	28	11	14	16	16.53	5	32	14	5.867	2.553	2.3393587625902e-06	5.08420057646068e-06
CUT_GIM_0586	10	15	4	7	3	10	7	11	18	8	16	4	8	3	10	7	9	18	9.15	9	7	11	0.811	-0.301	0.634468466282332	0.686645535930296
CUT_GIM_0587	269	212	210	80	63	43	166	229	144	223	221	184	92	72	42	168	186	141	147.57	209	69	165	0.325	-1.622	3.64595557419836e-10	1.04813374760349e-09
CUT_GIM_0588	9	14	12	35	22	51	20	10	16	7	15	11	40	25	50	20	8	16	21.33	11	38	15	3.222	1.688	0.000472804596757543	0.000833111356711195
CUT_GIM_0589	4	1	3	0	1	2	1	2	2	3	1	3	0	1	2	1	2	2	1.63	2	1	2	0.561	-0.834	0.392467343418951	0.451681443292679
CUT_GIM_0590	1	0	0	0	1	0	0	0	0	1	0	0	0	1	0	0	0	0	0.22	0	0	0	1.041	0.058	0.949744547588789	NA
CUT_GIM_0591	128	140	173	105	45	85	127	166	123	106	146	151	121	51	84	128	135	120	115.83	134	85	128	0.637	-0.651	0.0405422768128701	0.0566922396595908
CUT_GIM_0592	148	117	149	2367	747	1465	257	221	236	123	122	130	2727	850	1440	260	180	231	673.51	125	1672	224	11.67	3.545	4.1922121335388e-32	4.62171613137118e-31
CUT_GIM_0593	191	149	185	298	148	323	202	248	237	158	155	162	343	168	317	204	202	232	215.76	158	276	213	1.669	0.739	0.00399902701329414	0.00638139417552415
CUT_GIM_0594	32	32	43	24	33	73	27	39	43	27	33	38	28	38	72	27	32	42	37.27	33	46	34	1.319	0.399	0.231318759789997	0.280646908939567
CUT_GIM_0595	0	0	0	0	0	1	0	0	1	0	0	0	0	0	1	0	0	1	0.22	0	0	0	1.19	0.251	0.787044959666519	NA
CUT_GIM_0596	44	39	46	165	73	101	40	42	51	36	41	40	190	83	99	40	34	50	68.24	39	124	41	2.952	1.561	5.53827424838245e-06	1.16592096679152e-05
CUT_GIM_0597	4	3	2	6	4	5	5	6	5	3	3	2	7	5	5	5	5	5	4.38	3	6	5	1.764	0.819	0.257328204310678	0.309090080745666
CUT_GIM_0598	45	19	39	199	125	242	35	33	39	37	20	34	229	142	238	35	27	38	88.98	30	203	33	6.509	2.702	6.18773690676292e-23	4.00830895190862e-22
CUT_GIM_0599	0	0	0	0	0	0	0	0	0	0	0	0	0	0	0	0	0	0	0	0	0	0	1	0	NA	NA
CUT_GIM_0600	3	1	0	0	0	0	0	0	0	2	1	0	0	0	0	0	0	0	0.39	1	0	0	0.711	-0.492	0.598764993221549	0.652234126658
CUT_GIM_0601	105	63	78	47	57	69	69	90	71	87	66	68	54	65	68	70	73	69	68.88	74	62	71	0.855	-0.227	0.404485268387513	0.463867992774924
CUT_GIM_0602	0	1	2	0	0	0	0	0	1	0	1	2	0	0	0	0	0	1	0.42	1	0	0	0.704	-0.507	0.608473453937642	0.661576180007005
CUT_GIM_0603	36	23	39	182	67	105	18	27	30	30	24	34	210	76	103	18	22	29	60.72	29	130	23	4.064	2.023	1.30656342071013e-07	3.13585954701552e-07
CUT_GIM_0604	46	27	39	16	23	23	31	37	32	38	28	34	18	26	23	31	30	31	28.91	33	22	31	0.688	-0.539	0.134769781628907	0.172159998700853
CUT_GIM_0605	5	6	3	4	1	8	1	6	4	4	6	3	5	1	8	1	5	4	4.05	4	5	3	1.027	0.038	0.959944236407756	0.967728463307543
CUT_GIM_0606	33616	24093	30563	13363	15974	10994	20322	22209	22666	27839	25077	26749	15398	18167	10804	20531	18074	22152	20532.38	26555	14790	20252	0.561	-0.835	0.000238853771917302	0.000433625163682707
CUT_GIM_0607	0	0	0	0	0	0	0	0	0	0	0	0	0	0	0	0	0	0	0	0	0	0	1	0	NA	NA
CUT_GIM_0608	191	150	189	298	149	324	202	251	237	158	156	165	343	169	318	204	204	232	216.77	160	277	213	1.659	0.73	0.00436081777016308	0.00692586524356153
CUT_GIM_0609	332	268	366	655	561	1230	329	365	362	275	279	320	755	638	1209	332	297	354	495.44	291	867	328	2.863	1.517	3.89441169914731e-12	1.28960314866068e-11
CUT_GIM_0610	3	4	1	0	4	0	2	0	3	2	4	1	0	5	0	2	0	3	1.89	2	2	2	0.612	-0.709	0.491672656514276	0.549143330213689
CUT_GIM_0611	96	68	94	52	62	85	126	191	144	80	71	82	60	71	84	127	155	141	96.67	78	72	141	0.918	-0.123	0.626640329720897	0.679243010214117
CUT_GIM_0612	14	11	33	127	20	41	31	48	34	12	11	29	146	23	40	31	39	33	40.55	17	70	34	3.171	1.665	0.00286112877224942	0.00464183685027165
CUT_GIM_0613	3	2	1	0	0	0	0	0	0	2	2	1	0	0	0	0	0	0	0.6	2	0	0	0.471	-1.087	0.300580802935203	0.355309251780375
CUT_GIM_0614	0	0	1	0	1	1	0	0	0	0	0	1	0	1	1	0	0	0	0.33	0	1	0	1.203	0.267	0.779465584904532	NA
CUT_GIM_0615	175	158	194	524	358	740	332	403	375	145	164	170	604	407	727	335	328	367	360.8	160	579	343	3.519	1.815	4.28257701517369e-15	1.74986695801817e-14
CUT_GIM_0616	8	6	3	6	0	3	6	9	4	7	6	3	7	0	3	6	7	4	4.74	5	3	6	0.684	-0.548	0.471474632360498	0.529672423934318
CUT_GIM_0617	6	1	4	1	0	2	2	1	4	5	1	4	1	0	2	2	1	4	2.15	3	1	2	0.452	-1.144	0.227774313001629	0.276777646016121
CUT_GIM_0618	11	6	8	0	3	8	4	5	4	9	6	7	0	3	8	4	4	4	5.07	7	4	4	0.526	-0.928	0.217342019438857	0.265564495939197
CUT_GIM_0619	43	36	44	146	66	94	38	40	50	36	37	39	168	75	92	38	33	49	63.01	37	112	40	2.812	1.492	1.18325074578005e-05	2.42757517822783e-05
CUT_GIM_0620	3	1	3	0	1	1	1	1	2	2	1	3	0	1	1	1	1	2	1.34	2	1	1	0.513	-0.962	0.343751606268394	0.400586484927448
CUT_GIM_0621	29	30	21	209	52	164	104	100	79	24	31	18	241	59	161	105	81	77	88.71	24	154	88	5.473	2.452	5.00972245157964e-09	1.33296030439799e-08
CUT_GIM_0622	29	20	20	555	190	413	104	70	83	24	21	18	640	216	406	105	57	81	174.11	21	421	81	18.01	4.171	7.31643057011522e-39	1.18093656964594e-37
CUT_GIM_0623	95	51	63	40	27	64	58	56	85	79	53	55	46	31	63	59	46	83	57.09	62	47	63	0.741	-0.432	0.171557114583609	0.214144033435597
CUT_GIM_0624	3	5	3	1	1	0	1	6	1	2	5	3	1	1	0	1	5	1	2.16	3	1	2	0.341	-1.552	0.119211470051053	0.153713476665188
CUT_GIM_0625	13	12	10	17	30	40	31	33	32	11	12	9	20	34	39	31	27	31	23.83	11	31	30	2.723	1.445	0.00106879732669167	0.00181645805115167
CUT_GIM_0626	651	646	890	130	193	301	631	792	636	539	672	779	150	219	296	637	645	622	506.57	663	222	635	0.334	-1.581	1.13191635177658e-11	3.64697394178692e-11
CUT_GIM_0627	0	0	1	3	1	0	2	1	1	0	0	1	3	1	0	2	1	1	1.03	0	1	1	1.977	0.983	0.357626275848958	0.415223115705009
CUT_GIM_0628	602	587	636	197	241	239	490	611	518	499	611	557	227	274	235	495	497	506	433.41	556	245	499	0.446	-1.166	1.98964428502756e-10	5.82877490970972e-10
CUT_GIM_0629	36	30	49	109	57	72	25	28	39	30	31	43	126	65	71	25	23	38	50.14	35	87	29	2.406	1.267	0.000408114162453017	0.000724035540067702
CUT_GIM_0630	4	0	4	2	1	2	1	1	1	3	0	4	2	1	2	1	1	1	1.67	2	2	1	0.94	-0.089	0.923370164401981	0.938957861225335
CUT_GIM_0631	63	38	62	189	100	210	55	44	70	52	40	54	218	114	206	56	36	68	93.74	49	179	53	3.549	1.828	3.32138267879408e-12	1.10485846810098e-11
CUT_GIM_0632	32	19	22	101	55	71	39	54	39	27	20	19	116	63	70	39	44	38	48.41	22	83	40	3.62	1.856	5.90695891430951e-08	1.45538102198231e-07
CUT_GIM_0633	2	3	2	5	5	6	9	4	1	2	3	2	6	6	6	9	3	1	4.13	2	6	4	2.238	1.162	0.146786222207399	0.18578401307437
CUT_GIM_0634	10	8	5	8	2	5	6	4	4	8	8	4	9	2	5	6	3	4	5.62	7	5	4	0.789	-0.342	0.596173378303331	0.64989571817656
CUT_GIM_0635	6	2	3	6	2	2	7	1	2	5	2	3	7	2	2	7	1	2	3.41	3	4	3	1.056	0.078	0.919329908136947	0.935663587048281
CUT_GIM_0636	5	6	6	4	4	1	3	6	1	4	6	5	5	5	1	3	5	1	3.85	5	4	3	0.649	-0.624	0.407601048049341	0.467026339981594
CUT_GIM_0637	45	20	43	219	138	276	39	34	41	37	21	38	252	157	271	39	28	40	98.15	32	227	36	6.93	2.793	8.4479823073305e-26	6.5422876900904e-25
CUT_GIM_0638	46	43	67	41	25	41	51	50	46	38	45	59	47	28	40	52	41	45	43.85	47	38	46	0.826	-0.276	0.39330145267181	0.452463159669499
CUT_GIM_0639	2	4	1	4	1	0	0	4	1	2	4	1	5	1	0	0	3	1	1.85	2	2	1	0.894	-0.162	0.867425423341092	0.89192551668843
CUT_GIM_0640	402	257	359	947	612	1072	401	471	479	333	267	314	1091	696	1054	405	383	468	556.88	305	947	419	3.042	1.605	3.03022782914278e-16	1.33275281939641e-15
CUT_GIM_0641	37	17	29	8	5	5	8	13	22	31	18	25	9	6	5	8	11	22	14.86	25	7	14	0.296	-1.756	0.0015853042193279	0.00264655215815226
CUT_GIM_0642	20	14	21	26	22	14	27	30	30	17	15	18	30	25	14	27	24	29	22.14	17	23	27	1.321	0.401	0.332631775673524	0.389102595647728
CUT_GIM_0643	1	3	1	3	2	1	1	0	5	1	3	1	3	2	1	1	0	5	1.94	2	2	2	1.268	0.343	0.721425877943355	0.765372928701412
CUT_GIM_0644	0	0	2	3	1	1	0	3	3	0	0	2	3	1	1	0	2	3	1.41	1	2	2	2.363	1.241	0.243498324143046	0.294201966081022
CUT_GIM_0645	1	0	1	9	4	4	1	4	1	1	0	1	10	5	4	1	3	1	2.87	1	6	2	5.172	2.371	0.0192744138920126	0.0283036944888238
CUT_GIM_0646	1	1	0	0	1	0	0	1	1	1	1	0	0	1	0	0	1	1	0.53	1	0	1	0.84	-0.251	0.812533182398518	0.845752451189907
CUT_GIM_0647	17	10	14	280	159	164	6	25	11	14	10	12	323	181	161	6	20	11	82.06	12	222	12	15.913	3.992	1.77793394372441e-20	9.92686864135853e-20
CUT_GIM_0648	252	219	227	951	616	982	213	258	241	209	228	199	1096	701	965	215	210	236	450.83	212	921	220	4.241	2.084	1.04196862289602e-20	5.89087824245908e-20
CUT_GIM_0649	63	27	36	139	176	247	52	40	47	52	28	32	160	200	243	53	33	46	93.99	37	201	44	5.33	2.414	1.47983984153151e-13	5.42623419772112e-13
CUT_GIM_0650	14	9	12	33	19	47	20	28	31	12	9	11	38	22	46	20	23	30	23.4	11	35	24	3.119	1.641	0.000166070161026892	0.000306248367012823
CUT_GIM_0651	50	27	27	25	22	34	25	20	16	41	28	24	29	25	33	25	16	16	26.39	31	29	19	0.965	-0.051	0.889028490375908	0.910214380456708
CUT_GIM_0652	30	28	21	147	72	143	82	130	97	25	29	18	169	82	141	83	106	95	83.07	24	131	95	5.177	2.372	3.80786483364141e-11	1.18096359994516e-10
CUT_GIM_0653	5	1	7	20	9	17	6	2	0	4	1	6	23	10	17	6	2	0	7.66	4	17	3	3.717	1.894	0.00812133100313517	0.0124719059794532
CUT_GIM_0654	4	5	6	6	6	6	2	4	5	3	5	5	7	7	6	2	3	5	4.84	4	7	3	1.358	0.441	0.503516841496688	0.560710673692614
CUT_GIM_0655	1028	727	978	1158	568	900	804	906	917	851	757	856	1334	646	884	812	737	896	863.84	821	955	815	1.123	0.167	0.460695255535031	0.519309805747311
CUT_GIM_0656	4	3	8	6	3	4	4	3	5	3	3	7	7	3	4	4	2	5	4.34	4	5	4	1.062	0.086	0.90078435887316	0.919752382506924
CUT_GIM_0657	0	0	2	23	8	19	1	3	6	0	0	2	27	9	19	1	2	6	7.26	1	18	3	15.524	3.956	4.27989845819385e-05	8.3567073320724e-05
CUT_GIM_0658	6	11	13	67	39	42	15	14	13	5	11	11	77	44	41	15	11	13	25.54	9	54	13	5.319	2.411	4.28567393548679e-07	9.8859821575402e-07
CUT_GIM_0659	0	1	0	7	2	3	2	2	5	0	1	0	8	2	3	2	2	5	2.54	0	4	3	5.466	2.45	0.0207865710162983	0.0303450179758229
CUT_GIM_0660	7	5	5	3	4	4	8	2	13	6	5	4	3	5	4	8	2	13	5.53	5	4	8	0.82	-0.286	0.684615437583882	0.732102489348942
CUT_GIM_0661	5	2	3	2	10	9	5	0	4	4	2	3	2	11	9	5	0	4	4.48	3	7	3	2.192	1.133	0.171953207459039	0.214518938827533
CUT_GIM_0662	4	9	5	25	20	45	6	10	5	3	9	4	29	23	44	6	8	5	14.66	5	32	6	5.246	2.391	3.01758113811871e-05	5.98294081779016e-05
CUT_GIM_0663	17	8	13	33	13	31	9	12	7	14	8	11	38	15	30	9	10	7	15.86	11	28	9	2.264	1.179	0.0133815193429676	0.020050831522236
CUT_GIM_0664	10	3	10	53	47	63	21	26	17	8	3	9	61	53	62	21	21	17	28.4	7	59	20	7.989	2.998	3.44749742466262e-11	1.07233044728793e-10
CUT_GIM_0665	2	1	1	0	0	0	0	0	0	2	1	1	0	0	0	0	0	0	0.4	1	0	0	0.612	-0.707	0.474495863595959	0.532401943101464
CUT_GIM_0666	3	4	8	23	17	44	10	14	11	2	4	7	27	19	43	10	11	11	15	4	30	11	5.832	2.544	6.052784409218e-06	1.26943357153843e-05
CUT_GIM_0667	10	9	25	4	5	4	2	4	1	8	9	22	5	6	4	2	3	1	6.67	13	5	2	0.425	-1.235	0.0672432552378896	0.0907369842683651
CUT_GIM_0668	7	7	13	101	67	91	17	24	25	6	7	11	116	76	89	17	20	24	40.85	8	94	20	10.704	3.42	1.21513926477697e-15	5.14683488516986e-15
CUT_GIM_0669	68	38	40	23	7	19	35	40	32	56	40	35	27	8	19	35	33	31	31.47	44	18	33	0.416	-1.265	0.0015895770738383	0.00265292740429511
CUT_GIM_0670	6	12	12	71	18	44	12	3	4	5	12	11	82	20	43	12	2	4	21.33	9	48	6	3.881	1.957	0.000683314517795093	0.00118545330388264
CUT_GIM_0671	1	0	2	4	4	3	1	1	1	1	0	2	5	5	3	1	1	1	1.94	1	4	1	3.038	1.603	0.10188449320851	0.132911608353946
CUT_GIM_0672	7	4	10	97	20	57	8	10	7	6	4	9	112	23	56	8	8	7	25.81	6	64	8	8.103	3.019	2.53880754617364e-08	6.4440714562522e-08
CUT_GIM_0673	53	39	52	299	140	217	61	69	55	44	41	46	345	159	213	62	56	54	113.17	44	239	57	5.189	2.375	5.37717458156616e-16	2.32559815544716e-15
CUT_GIM_0674	0	1	1	13	2	8	0	3	2	0	1	1	15	2	8	0	2	2	3.49	1	8	1	6.522	2.705	0.00886319142379189	0.0135463320662349
CUT_GIM_0675	5	5	5	13	5	19	26	31	26	4	5	4	15	6	19	26	25	25	14.44	4	13	25	2.546	1.348	0.018901911507212	0.0277986078370601
CUT_GIM_0676	4	3	5	6	4	4	1	4	5	3	3	4	7	5	4	1	3	5	3.93	3	5	3	1.336	0.418	0.566161629520995	0.621352817673023
CUT_GIM_0677	15	3	10	9	4	4	3	3	4	12	3	9	10	5	4	3	2	4	5.84	8	6	3	0.825	-0.278	0.660519172437216	0.710430469314432
CUT_GIM_0678	0	0	2	11	3	10	0	3	1	0	0	2	13	3	10	0	2	1	3.45	1	9	1	7.113	2.831	0.00691824849923879	0.0107166823915833
CUT_GIM_0679	23	18	27	19	8	10	14	19	18	19	19	24	22	9	10	14	15	18	16.6	21	14	16	0.676	-0.564	0.221721720762882	0.270350587315843
CUT_GIM_0680	3	2	2	3	1	1	4	2	5	2	2	2	3	1	1	4	2	5	2.49	2	2	4	0.874	-0.195	0.82208787841993	0.853796564807617
CUT_GIM_0681	70	57	60	33	34	55	63	60	57	58	59	53	38	39	54	64	49	56	52.08	57	44	56	0.781	-0.357	0.234175053665919	0.283729359993772
CUT_GIM_0682	35	33	32	10	18	8	26	44	29	29	34	28	12	20	8	26	36	28	24.62	30	13	30	0.44	-1.184	0.00453907437923278	0.00719723516902501
CUT_GIM_0683	13	7	23	26	22	68	44	39	29	11	7	20	30	25	67	44	32	28	29.39	13	41	35	2.97	1.571	0.000712422402786499	0.00123320518426352
CUT_GIM_0684	46	36	36	33	21	41	47	61	43	38	37	32	38	24	40	47	50	42	38.71	36	34	46	0.959	-0.061	0.855767511630219	0.88172872821753
CUT_GIM_0685	6	2	9	11	2	8	4	3	6	5	2	8	13	2	8	4	2	6	5.57	5	8	4	1.384	0.469	0.47711590886993	0.534981434566686
CUT_GIM_0686	15	13	14	1	11	15	7	8	16	12	14	12	1	13	15	7	7	16	10.65	13	10	10	0.685	-0.545	0.352520242393716	0.409783303751413
CUT_GIM_0687	34	25	34	113	89	162	32	48	46	28	26	30	130	101	159	32	39	45	65.66	28	130	39	4.494	2.168	3.6164205111172e-13	1.28767489618878e-12
CUT_GIM_0688	111	100	103	54	36	54	85	119	98	92	104	90	62	41	53	86	97	96	80.1	95	52	93	0.557	-0.844	0.00220551289227205	0.0036209080723646
CUT_GIM_0689	6	3	3	21	5	13	8	6	4	5	3	3	24	6	13	8	5	4	7.81	4	14	6	3.274	1.711	0.00944090496755213	0.0143954091141459
CUT_GIM_0690	7	3	4	6	2	0	1	3	2	6	3	4	7	2	0	1	2	2	3	4	3	2	0.692	-0.53	0.530597275477322	0.587174219813256
CUT_GIM_0691	1	1	4	3	6	13	8	10	12	1	1	4	3	7	13	8	8	12	6.26	2	8	9	3.424	1.776	0.02249984340129	0.0327397796024748
CUT_GIM_0692	10	6	3	52	20	40	4	11	11	8	6	3	60	23	39	4	9	11	18.1	6	41	8	6.14	2.618	6.67379634083474e-06	1.39641869362569e-05
CUT_GIM_0693	780	562	648	243	349	279	556	686	559	646	585	567	280	397	274	562	558	546	490.61	599	317	555	0.53	-0.915	8.59573595661329e-06	1.78197215520637e-05
CUT_GIM_0694	42	36	35	49	27	49	57	80	55	35	37	31	56	31	48	58	65	54	46.07	34	45	59	1.289	0.366	0.265761760931191	0.318238747642371
CUT_GIM_0695	38	20	42	417	164	350	69	69	74	31	21	37	480	187	344	70	56	72	144.24	30	337	66	10.568	3.402	6.94050093209063e-30	6.71413028910688e-29
CUT_GIM_0696	8	3	5	0	1	7	0	3	6	7	3	4	0	1	7	0	2	6	3.38	5	3	3	0.433	-1.207	0.19036425893266	0.235382153199351
CUT_GIM_0697	0	0	4	1	0	3	4	7	4	0	0	4	1	0	3	4	6	4	2.36	1	1	5	1.244	0.315	0.755413614001139	0.795045310967411
CUT_GIM_0698	72	59	62	46	58	58	54	56	55	60	61	54	53	66	57	55	46	54	56.13	58	59	52	1.004	0.005	0.984631660721992	0.986827237323945
CUT_GIM_0699	30	19	35	257	252	572	145	153	137	25	20	31	296	287	562	146	125	134	180.56	25	382	135	14.18	3.826	1.24909676282298e-36	1.76718459689459e-35
CUT_GIM_0700	20	34	30	178	27	77	24	28	30	17	35	26	205	31	76	24	23	29	51.78	26	104	25	3.116	1.64	0.00184802576456559	0.00306109554708909
CUT_GIM_0701	64	53	58	18	32	28	45	44	43	53	55	51	21	36	28	45	36	42	40.76	53	28	41	0.547	-0.871	0.00994220632500157	0.0151135500099246
CUT_GIM_0702	15	4	14	70	28	60	14	12	13	12	4	12	81	32	59	14	10	13	26.32	9	57	12	5.549	2.472	1.02594549396833e-08	2.67020023218572e-08
CUT_GIM_0703	5	4	2	0	6	5	5	1	1	4	4	2	0	7	5	5	1	1	3.18	3	4	2	1.194	0.256	0.767540370310723	0.805738121402363
CUT_GIM_0704	3	0	2	25	5	12	4	6	4	2	0	2	29	6	12	4	5	4	7.04	1	16	4	7.117	2.831	0.000657629063385813	0.00114360911231051
CUT_GIM_0705	3	1	7	0	1	1	1	1	3	2	1	6	0	1	1	1	1	3	1.84	3	1	2	0.385	-1.378	0.168369066100597	0.210389318482846
CUT_GIM_0706	8	14	35	2	10	4	4	5	10	7	15	31	2	11	4	4	4	10	9.7	18	6	6	0.409	-1.289	0.0447643176648781	0.0620982687834479
CUT_GIM_0707	0	2	2	2	0	2	0	1	2	0	2	2	2	0	2	0	1	2	1.21	1	1	1	1.219	0.285	0.781218958519969	0.817673510905898
CUT_GIM_0708	9	8	8	37	8	14	6	15	6	7	8	7	43	9	14	6	12	6	12.49	7	22	8	2.359	1.238	0.0394561933709133	0.0552859803036562
CUT_GIM_0709	19	13	19	125	99	90	17	23	20	16	14	17	144	113	88	17	19	20	49.6	16	115	19	7.071	2.822	2.50552196117496e-15	1.0401253867954e-14
CUT_GIM_0710	5	1	2	6	2	2	1	2	2	4	1	2	7	2	2	1	2	2	2.52	2	4	2	1.391	0.477	0.57030467679189	0.625136521244727
CUT_GIM_0711	2	0	0	15	10	4	8	7	4	2	0	0	17	11	4	8	6	4	5.77	1	11	6	9.759	3.287	0.00060376121875024	0.00105401159281675
CUT_GIM_0712	16	8	12	8	4	2	14	6	8	13	8	11	9	5	2	14	5	8	8.3	11	5	9	0.504	-0.989	0.10798538614608	0.140306562430853
CUT_GIM_0713	9	7	11	6	4	0	11	5	6	7	7	10	7	5	0	11	4	6	6.32	8	4	7	0.47	-1.088	0.138192523161321	0.17614526877171
CUT_GIM_0714	8	12	14	62	33	51	8	9	12	7	12	12	71	38	50	8	7	12	24.18	10	53	9	4.723	2.24	1.55888511391697e-06	3.42942986469008e-06
CUT_GIM_0715	1	1	2	0	0	0	0	0	0	1	1	2	0	0	0	0	0	0	0.4	1	0	0	0.608	-0.718	0.468987947432963	0.527385792311548
CUT_GIM_0716	0	0	1	1	1	1	1	3	0	0	0	1	1	1	1	1	2	0	0.84	0	1	1	1.815	0.86	0.422484606377938	0.481955789743517
CUT_GIM_0717	28	13	31	149	78	131	52	41	44	23	14	27	172	89	129	53	33	43	64.65	21	130	43	5.856	2.55	3.88268251898361e-16	1.69365539069961e-15
CUT_GIM_0718	42	26	33	25	20	27	37	35	26	35	27	29	29	23	27	37	28	25	28.9	30	26	30	0.873	-0.195	0.57102274989174	0.625864927333978
CUT_GIM_0719	61	48	55	85	45	81	63	52	46	51	50	48	98	51	80	64	42	45	58.7	50	76	50	1.475	0.561	0.0559769842524225	0.0764279749940191
CUT_GIM_0720	286	247	258	95	115	97	282	277	279	237	257	226	109	131	95	285	225	273	204.26	240	112	261	0.472	-1.084	2.9685017829216e-06	6.40035273712579e-06
CUT_GIM_0721	30	19	18	555	140	255	35	51	44	25	20	16	640	159	251	35	42	43	136.62	20	350	40	14.469	3.855	3.51788985630439e-21	2.04833387447798e-20
CUT_GIM_0722	0	0	0	1	0	2	1	3	0	0	0	0	1	0	2	1	2	0	0.73	0	1	1	2.124	1.087	0.310352409663422	0.365565795718854
CUT_GIM_0723	1	0	4	0	0	0	0	2	0	1	0	4	0	0	0	0	2	0	0.66	2	0	1	0.516	-0.956	0.357413058227056	0.415016792372951
CUT_GIM_0724	1	0	0	0	1	0	0	2	0	1	0	0	0	1	0	0	2	0	0.4	0	0	1	0.985	-0.021	0.982421959985167	0.985204069714809
CUT_GIM_0725	1	2	3	0	0	0	2	2	1	1	2	3	0	0	0	2	2	1	1.13	2	0	2	0.291	-1.779	0.102377229314503	0.133524587251036
CUT_GIM_0726	17	11	21	110	58	118	43	36	38	14	11	18	127	66	116	43	29	37	51.38	14	103	36	6.645	2.732	3.11899829834083e-15	1.28475904527356e-14
CUT_GIM_0727	37	26	18	6	2	6	14	15	14	31	27	16	7	2	6	14	12	14	14.29	25	5	13	0.231	-2.111	0.000219252507286752	0.000399654468905472
CUT_GIM_0728	21	16	31	60	29	62	17	10	16	17	17	27	69	33	61	17	8	16	29.46	20	54	14	2.517	1.332	0.000445149177263566	0.000786515464998796
CUT_GIM_0729	116	66	89	1592	457	1022	204	238	179	96	69	78	1834	520	1004	206	194	175	463.99	81	1119	192	12.219	3.611	5.65925223712899e-30	5.50657965387921e-29
CUT_GIM_0730	74	60	96	89	34	88	72	80	86	61	62	84	103	39	86	73	65	84	73.04	69	76	74	1.054	0.076	0.805387635733737	0.839735895002182
CUT_GIM_0731	25	10	9	7	2	2	16	13	10	21	10	8	8	2	2	16	11	10	9.76	13	4	12	0.343	-1.542	0.0143967677528371	0.0214729582590496
CUT_GIM_0732	16	5	12	115	108	261	67	86	101	13	5	11	133	123	256	68	70	99	86.35	10	171	79	15.653	3.968	5.87116976339622e-25	4.32873753028696e-24
CUT_GIM_0733	0	0	0	2	0	0	0	1	0	0	0	0	2	0	0	0	1	0	0.35	0	1	0	1.33	0.412	0.657809818507308	NA
CUT_GIM_0734	1	0	0	0	2	0	2	3	0	1	0	0	0	2	0	2	2	0	0.84	0	1	1	1.232	0.301	0.777231832140257	0.814375611081417
CUT_GIM_0735	18	11	12	4	0	4	8	8	6	15	11	11	5	0	4	8	7	6	7.32	12	3	7	0.269	-1.893	0.00815263479112706	0.0125110558331071
CUT_GIM_0736	6	3	0	7	1	4	1	3	0	5	3	0	8	1	4	1	2	0	2.74	3	4	1	1.791	0.841	0.356671541640803	0.414238087419442
CUT_GIM_0737	11	5	18	20	7	21	4	9	9	9	5	16	23	8	21	4	7	9	11.32	10	17	7	1.626	0.701	0.189771801568965	0.234699256337699
CUT_GIM_0738	0	0	0	1	0	0	1	0	0	0	0	0	1	0	0	1	0	0	0.24	0	0	0	1.193	0.254	0.783931164175503	NA
CUT_GIM_0739	1	1	0	5	0	2	2	1	2	1	1	0	6	0	2	2	1	2	1.6	1	3	2	2.145	1.101	0.281724000044204	0.335530642531244
CUT_GIM_0740	9	6	9	68	23	27	14	10	6	7	6	8	78	26	27	14	8	6	20.09	7	44	9	5.005	2.323	3.69133679293559e-06	7.89475874126011e-06
CUT_GIM_0741	2	3	8	2	0	1	5	1	3	2	3	7	2	0	1	5	1	3	2.65	4	1	3	0.363	-1.461	0.12814997961621	0.164458671402924
CUT_GIM_0742	2	2	10	8	2	5	2	1	9	2	2	9	9	2	5	2	1	9	4.5	4	5	4	1.427	0.513	0.50307675690673	0.560273990394744
CUT_GIM_0743	2	5	12	0	2	9	5	5	2	2	5	11	0	2	9	5	4	2	4.4	6	4	4	0.667	-0.585	0.476703696271519	0.534673135102118
CUT_GIM_0744	2	0	2	13	5	5	1	2	2	2	0	2	15	6	5	1	2	2	3.73	1	9	2	4.785	2.259	0.0129725959481288	0.019460559210505
CUT_GIM_0745	250	191	251	54	102	157	160	213	184	207	199	220	62	116	154	162	173	180	163.65	209	111	172	0.524	-0.934	0.000755599946713648	0.001304467569404
CUT_GIM_0746	10	2	3	16	11	7	6	5	2	8	2	3	18	13	7	6	4	2	6.99	4	13	4	2.645	1.403	0.0309417991612083	0.0440743375180254
CUT_GIM_0747	3	5	8	13	5	9	2	6	2	2	5	7	15	6	9	2	5	2	5.9	5	10	3	1.814	0.859	0.209911663306751	0.257346590159745
CUT_GIM_0748	41	24	37	385	85	147	53	56	51	34	25	32	444	97	144	54	46	50	102.78	30	228	50	6.11	2.611	4.25413563421538e-11	1.31657386179664e-10
CUT_GIM_0749	52	24	33	24	20	15	19	13	21	43	25	29	28	23	15	19	11	21	23.6	32	22	17	0.7	-0.515	0.194601525457967	0.240062643988367
CUT_GIM_0750	153	166	260	48	22	27	175	245	166	127	173	228	55	25	27	177	199	162	130.26	176	36	179	0.208	-2.268	5.63923097732313e-10	1.60184864368007e-09
CUT_GIM_0751	12	6	8	9	4	5	10	8	4	10	6	7	10	5	5	10	7	4	7.06	8	7	7	0.853	-0.23	0.69446814984	0.741620652383281
CUT_GIM_0752	43	27	25	245	173	359	43	38	36	36	28	22	282	197	353	43	31	35	114.11	29	277	36	9.262	3.211	3.97850822170257e-25	2.95944284397303e-24
CUT_GIM_0753	2	4	3	6	5	6	3	5	4	2	4	3	7	6	6	3	4	4	4.22	3	6	4	1.955	0.967	0.186046888934181	0.230507203571336
CUT_GIM_0754	19	10	17	20	10	8	11	9	11	16	10	15	23	11	8	11	7	11	12.5	14	14	10	0.988	-0.017	0.971587104662973	0.976517322189
CUT_GIM_0755	269	201	266	107	58	56	151	155	176	223	209	233	123	66	55	153	126	172	151.09	222	81	150	0.363	-1.461	7.22912560204064e-07	1.63059150058872e-06
CUT_GIM_0756	1	1	1	1	0	0	0	0	0	1	1	1	1	0	0	0	0	0	0.43	1	0	0	0.733	-0.447	0.665894738057247	0.715266986045679
CUT_GIM_0757	2	5	0	0	3	2	1	0	2	2	5	0	0	3	2	1	0	2	1.69	2	2	1	0.85	-0.234	0.816633581471266	0.84896183907777
CUT_GIM_0758	13	5	11	10	6	5	5	1	4	11	5	10	12	7	5	5	1	4	6.51	9	8	3	0.927	-0.109	0.856291257954562	0.882117384408468
CUT_GIM_0759	6	4	8	36	6	23	10	8	10	5	4	7	41	7	23	10	7	10	12.6	5	24	9	3.523	1.817	0.00212498264415342	0.00349458868274373
CUT_GIM_0760	16	7	18	3	1	7	11	4	10	13	7	16	3	1	7	11	3	10	7.99	12	4	8	0.345	-1.536	0.0198930979531775	0.0291572485489568
CUT_GIM_0761	48	28	34	572	220	471	92	104	102	40	29	30	659	250	463	93	85	100	194.23	33	457	93	12.761	3.674	2.96967151463731e-33	3.49130596781204e-32
CUT_GIM_0762	11	8	15	13	1	4	9	12	10	9	8	13	15	1	4	9	10	10	8.8	10	7	10	0.619	-0.691	0.283692772371151	0.337497071966738
CUT_GIM_0763	6	6	8	44	44	92	18	7	6	5	6	7	51	50	90	18	6	6	26.57	6	64	10	9.195	3.201	2.11096141954664e-09	5.76102175357825e-09
CUT_GIM_0764	8	1	2	8	4	8	4	7	3	7	1	2	9	5	8	4	6	3	4.86	3	7	4	2.11	1.077	0.150124373103222	0.18965982963073
CUT_GIM_0765	1	1	0	5	0	4	1	0	3	1	1	0	6	0	4	1	0	3	1.72	1	3	1	2.225	1.154	0.259378570824809	0.311232978607528
CUT_GIM_0766	15	4	16	41	18	60	6	4	15	12	4	14	47	20	59	6	3	15	20.14	10	42	8	3.938	1.978	1.84231512903214e-05	3.70811136718388e-05
CUT_GIM_0767	2002	1229	1137	206	376	237	624	680	622	1658	1279	995	237	428	233	630	553	608	735.76	1311	299	597	0.232	-2.109	2.35978658536297e-14	9.1768605778874e-14
CUT_GIM_0768	4	6	6	10	9	7	4	6	7	3	6	5	12	10	7	4	5	7	6.58	5	10	5	1.778	0.83	0.183686134352404	0.227799656801676
CUT_GIM_0769	44	17	35	253	211	287	48	56	71	36	18	31	292	240	282	48	46	69	117.97	28	271	54	9.364	3.227	4.13073408853989e-29	3.80992569523892e-28
CUT_GIM_0770	388	357	406	422	276	426	324	394	379	321	372	355	486	314	419	327	321	370	365.05	349	406	339	1.147	0.198	0.362736276838317	0.420279211890994
CUT_GIM_0771	1	0	1	0	0	3	1	0	0	1	0	1	0	0	3	1	0	0	0.63	1	1	0	1.129	0.175	0.86862677631045	0.892717426192295
CUT_GIM_0772	4	5	7	3	2	3	5	4	1	3	5	6	3	2	3	5	3	1	3.62	5	3	3	0.659	-0.602	0.433900802318576	0.493293586525429
CUT_GIM_0773	1	0	2	4	1	1	0	1	5	1	0	2	5	1	1	0	1	5	1.67	1	2	2	2.047	1.034	0.313460420215838	0.36900357314821
CUT_GIM_0774	14	15	15	35	22	49	22	22	27	12	16	13	40	25	48	22	18	26	24.48	14	38	22	2.643	1.402	0.000714921005276222	0.00123716375946364
CUT_GIM_0775	9	1	5	6	4	5	8	6	8	7	1	4	7	5	5	8	5	8	5.56	4	6	7	1.283	0.36	0.590245974278285	0.644395969302694
CUT_GIM_0776	8	5	6	5	2	6	7	6	4	7	5	5	6	2	6	7	5	4	5.21	6	5	5	0.842	-0.248	0.705234161675398	0.75085335398494
CUT_GIM_0777	0	0	1	4	1	3	1	2	1	0	0	1	5	1	3	1	2	1	1.47	0	3	1	3.641	1.864	0.0821231542364679	0.109093006753139
CUT_GIM_0778	9	3	5	3	2	3	3	6	7	7	3	4	3	2	3	3	5	7	4.27	5	3	5	0.654	-0.613	0.407458490032863	0.466956939739535
CUT_GIM_0779	1394	929	894	339	456	306	647	769	750	1154	967	782	391	519	301	654	626	733	680.69	968	404	671	0.421	-1.249	3.02379484156729e-07	7.07004132023917e-07
CUT_GIM_0780	17	17	27	103	73	140	43	54	43	14	18	24	119	83	138	43	44	42	58.23	19	113	43	5.89	2.558	4.59344973137361e-14	1.74736502476667e-13
CUT_GIM_0781	17	12	19	506	240	316	18	28	31	14	12	17	583	273	311	18	23	30	142.33	14	389	24	24.151	4.594	2.41229837382459e-34	3.03119556951765e-33
CUT_GIM_0782	0	0	0	1	1	0	0	0	1	0	0	0	1	1	0	0	0	1	0.36	0	1	0	1.495	0.58	0.54771047214778	0.603198998918005
CUT_GIM_0783	40966	33257	40833	16981	22078	18044	37127	44251	36458	33926	34615	35737	19567	25109	17733	37509	36013	35632	30648.88	34759	20803	36385	0.599	-0.738	4.96232995959353e-05	9.62007098669708e-05
CUT_GIM_0784	18	9	10	223	8	48	31	19	25	15	9	9	257	9	47	31	15	24	46.39	11	104	23	5.124	2.357	7.42964297329768e-05	0.000141635901771544
CUT_GIM_0785	16	19	24	67	35	97	24	28	25	13	20	21	77	40	95	24	23	24	37.54	18	71	24	3.683	1.881	1.92765560478697e-06	4.2113635067378e-06
CUT_GIM_0786	39	49	48	764	406	652	57	82	61	32	51	42	880	462	641	58	67	60	254.67	42	661	62	14.955	3.903	1.04986666878145e-35	1.40858115859702e-34
CUT_GIM_0787	16	4	19	99	43	104	87	72	50	13	4	17	114	49	102	88	59	49	54.95	11	88	65	7.227	2.853	1.60070078971841e-11	5.10111519734096e-11
CUT_GIM_0788	1	0	0	0	1	3	0	3	0	1	0	0	0	1	3	0	2	0	0.82	0	1	1	1.753	0.81	0.449559190718041	0.508769000845539
CUT_GIM_0789	192	97	180	1507	1084	2086	229	239	270	159	101	158	1736	1233	2050	231	195	264	680.73	139	1673	230	11.78	3.558	2.27136150435561e-77	2.83360980475996e-75
CUT_GIM_0790	20	4	13	48	27	35	19	12	16	17	4	11	55	31	34	19	10	16	21.9	11	40	15	3.667	1.875	2.15595972441344e-05	4.32005235588057e-05
CUT_GIM_0791	1	0	2	7	1	4	1	2	0	1	0	2	8	1	4	1	2	0	2.04	1	4	1	2.767	1.468	0.144107662774896	0.18273026770697
CUT_GIM_0792	1	2	5	5	7	14	10	3	2	1	2	4	6	8	14	10	2	2	5.47	2	9	5	3.01	1.59	0.0493464177123217	0.0680745682846673
CUT_GIM_0793	1	0	0	0	0	1	0	0	0	1	0	0	0	0	1	0	0	0	0.2	0	0	0	1.041	0.058	0.949744547588789	NA
CUT_GIM_0794	9	8	6	5	11	10	3	1	3	7	8	5	6	13	10	3	1	3	6.21	7	10	2	1.267	0.341	0.581543396845176	0.636143043670573
CUT_GIM_0795	7	5	6	2	4	2	6	0	2	6	5	5	2	5	2	6	0	2	3.68	5	3	3	0.641	-0.641	0.42879969397549	0.488254235973651
CUT_GIM_0796	4	2	2	32	19	40	9	10	10	3	2	2	37	22	39	9	8	10	14.66	2	33	9	11.009	3.461	3.84092379227618e-08	9.63198185333464e-08
CUT_GIM_0797	9	3	4	9	18	38	8	4	6	7	3	4	10	20	37	8	3	6	11.05	5	22	6	4.157	2.056	0.00164174327835761	0.00273452279801696
CUT_GIM_0798	141	73	131	774	680	755	175	170	167	117	76	115	892	773	742	177	138	163	354.77	103	802	159	7.761	2.956	7.82153279723761e-44	1.63218629050926e-42
CUT_GIM_0799	40	26	39	19	10	22	17	13	19	33	27	34	22	11	22	17	11	19	21.73	31	18	16	0.593	-0.753	0.0551762845104016	0.0754493401343966
CUT_GIM_0800	25	14	8	23	7	21	25	37	24	21	15	7	27	8	21	25	30	23	19.58	14	19	26	1.281	0.357	0.459900973637168	0.518758554760802
CUT_GIM_0801	46	17	41	337	195	438	153	193	158	38	18	36	388	222	430	155	157	154	177.58	31	347	155	10.813	3.435	6.80373633389441e-30	6.58727943644491e-29
CUT_GIM_0802	0	2	2	0	2	2	1	2	4	0	2	2	0	2	2	1	2	4	1.62	1	1	2	1.095	0.131	0.892972673761338	0.913612210258711
CUT_GIM_0803	64	68	97	460	327	634	103	107	120	53	71	85	530	372	623	104	87	117	226.9	70	508	103	7.104	2.829	1.81508916038057e-30	1.82539861688531e-29
CUT_GIM_0804	1	0	1	13	2	4	1	1	4	1	0	1	15	2	4	1	1	4	3.18	1	7	2	5.671	2.504	0.0124221587200724	0.0186659826157601
CUT_GIM_0805	46	25	30	361	112	163	22	19	24	38	26	26	416	127	160	22	15	23	95.01	30	234	20	6.811	2.768	1.0587411972141e-15	4.50070921449398e-15
CUT_GIM_0806	15	5	6	3	1	5	6	4	10	12	5	5	3	1	5	6	3	10	5.72	7	3	6	0.468	-1.094	0.129608090690695	0.166111005462981
CUT_GIM_0807	7	3	3	5	10	9	3	1	3	6	3	3	6	11	9	3	1	3	4.92	4	9	2	2.011	1.008	0.15730638950256	0.197920162330632
CUT_GIM_0808	16	20	15	11	9	13	16	14	16	13	21	13	13	10	13	16	11	16	14.01	16	12	14	0.787	-0.345	0.461070315912238	0.519682456766051
CUT_GIM_0809	3	3	3	6	3	4	2	2	2	2	3	3	7	3	4	2	2	2	3.12	3	5	2	1.504	0.589	0.441470521568711	0.500487438402402
CUT_GIM_0810	156	144	173	34	42	49	118	176	137	129	150	151	39	48	48	119	143	134	106.88	143	45	132	0.319	-1.651	3.16268227150045e-11	9.85050773580869e-11
CUT_GIM_0811	19	13	19	294	62	189	31	46	43	16	14	17	339	71	186	31	37	42	83.52	16	199	37	10.709	3.421	1.59321107650886e-14	6.2857071708584e-14
CUT_GIM_0812	0	0	0	0	1	1	2	2	1	0	0	0	0	1	1	2	2	1	0.75	0	1	2	1.852	0.889	0.408528210613077	0.467953408079241
CUT_GIM_0813	11	1	3	21	4	6	7	4	3	9	1	3	24	5	6	7	3	3	6.74	4	12	4	2.334	1.223	0.0712304067587807	0.0956120529959925
CUT_GIM_0814	15	7	10	15	16	24	20	24	16	12	7	9	17	18	24	20	20	16	15.88	9	20	19	1.965	0.975	0.0385597492025421	0.0541207337474066
CUT_GIM_0815	1	0	0	1	0	0	0	1	0	1	0	0	1	0	0	0	1	0	0.31	0	0	0	1.048	0.068	0.942289765974485	NA
CUT_GIM_0816	4888	2517	2246	3217	4100	2431	1794	2165	2109	4048	2620	1966	3707	4663	2389	1812	1762	2061	2780.87	2878	3586	1878	1.241	0.312	0.255338707957163	0.306921224150113
CUT_GIM_0817	1597	1211	1484	2607	2232	2705	1547	1769	1593	1323	1260	1299	3004	2538	2658	1563	1440	1557	1849.11	1294	2733	1520	2.095	1.067	6.68002895064451e-12	2.18357533754494e-11
CUT_GIM_0818	2	1	2	3	0	4	1	2	3	2	1	2	3	0	4	1	2	3	1.93	2	2	2	1.291	0.369	0.689141645973657	0.736336223356327
CUT_GIM_0819	3	6	6	11	11	7	3	3	5	2	6	5	13	13	7	3	2	5	6.27	4	11	3	2.073	1.052	0.109690006069682	0.142363106500477
CUT_GIM_0820	73	23	34	31	25	38	31	37	34	60	24	30	36	28	37	31	30	33	34.48	38	34	31	0.931	-0.103	0.775686964683677	0.812852793304301
CUT_GIM_0821	74	64	89	24	48	79	101	107	103	61	67	78	28	55	78	102	87	101	72.83	69	54	97	0.768	-0.382	0.22922106823819	0.278361987262963
CUT_GIM_0822	3	3	2	1	0	3	1	3	1	2	3	2	1	0	3	1	2	1	1.77	2	1	1	0.675	-0.567	0.548461358036908	0.603912129465684
CUT_GIM_0823	101	66	97	458	231	389	154	172	161	84	69	85	528	263	382	156	140	157	206.99	79	391	151	4.743	2.246	1.80309755193273e-19	9.47436960066813e-19
CUT_GIM_0824	16	4	13	15	6	18	6	11	4	13	4	11	17	7	18	6	9	4	9.95	9	14	6	1.376	0.461	0.416473118369746	0.475794785538064
CUT_GIM_0825	52	35	29	38	28	45	35	34	32	43	36	25	44	32	44	35	28	31	35.45	35	40	31	1.141	0.19	0.567698342432618	0.622630016862278
CUT_GIM_0826	21	17	9	125	83	181	18	18	19	17	18	8	144	94	178	18	15	19	56.74	14	139	17	8.97	3.165	2.50641986675667e-15	1.04012864214909e-14
CUT_GIM_0827	20	15	10	9	6	0	17	23	16	17	16	9	10	7	0	17	19	16	12.18	14	6	17	0.42	-1.253	0.0420303199162467	0.0586257243424754
CUT_GIM_0828	7	4	9	3	6	2	7	5	4	6	4	8	3	7	2	7	4	4	5.01	6	4	5	0.717	-0.48	0.490919081518162	0.548511366920474
CUT_GIM_0829	3	4	2	18	8	15	2	4	1	2	4	2	21	9	15	2	3	1	6.58	3	15	2	4.476	2.162	0.00324779037350687	0.00523066128787228
CUT_GIM_0830	7	12	12	21	18	45	20	9	9	6	12	11	24	20	44	20	7	9	17.11	10	29	12	2.76	1.465	0.00702336319484066	0.010869424221283
CUT_GIM_0831	24	5	16	20	15	17	12	3	8	20	5	14	23	17	17	12	2	8	13.14	13	19	7	1.515	0.6	0.226233263330863	0.275105298156552
CUT_GIM_0832	0	0	0	0	0	1	0	0	1	0	0	0	0	0	1	0	0	1	0.22	0	0	0	1.19	0.251	0.787044959666519	NA
CUT_GIM_0833	4	2	2	2	0	0	0	3	0	3	2	2	2	0	0	0	2	0	1.32	2	1	1	0.481	-1.056	0.320019947023411	0.375634807769461
CUT_GIM_0834	1	1	0	0	1	0	3	1	2	1	1	0	0	1	0	3	1	2	0.98	1	0	2	0.843	-0.247	0.815725725687727	0.848395410322782
CUT_GIM_0835	15	8	6	3	5	6	9	14	15	12	8	5	3	6	6	9	11	15	8.47	8	5	12	0.63	-0.668	0.274861335775259	0.327958910544178
CUT_GIM_0836	2	2	0	0	0	0	0	1	1	2	2	0	0	0	0	0	1	1	0.61	1	0	1	0.509	-0.975	0.361021889411305	0.418541976826977
CUT_GIM_0837	1	3	1	18	8	7	2	0	1	1	3	1	21	9	7	2	0	1	4.95	2	12	1	5.07	2.342	0.00598032556147039	0.00934056195019286
CUT_GIM_0838	1	2	1	0	2	4	1	0	0	1	2	1	0	2	4	1	0	0	1.22	1	2	0	1.294	0.372	0.713399274133744	0.758165143463708
CUT_GIM_0839	3	1	0	3	1	5	4	3	5	2	1	0	3	1	5	4	2	5	2.71	1	3	4	2.03	1.021	0.265091312490408	0.317533525805956
CUT_GIM_0840	1271	1046	1314	4858	3141	3711	1277	1453	1413	1053	1089	1150	5598	3572	3647	1290	1182	1381	2217.98	1097	4272	1284	3.789	1.922	4.42984676109612e-19	2.28552711921277e-18
CUT_GIM_0841	55	56	71	687	356	654	95	75	94	46	58	62	792	405	643	96	61	92	250.45	55	613	83	10.367	3.374	7.66657138213904e-34	9.34652335373486e-33
CUT_GIM_0842	1	2	3	3	0	4	2	3	1	1	2	3	3	0	4	2	2	1	2.04	2	2	2	1.181	0.24	0.79315239241252	0.82853122890254
CUT_GIM_0843	98	82	78	2100	749	1591	246	332	228	81	85	68	2420	852	1564	249	270	223	645.72	78	1612	247	18.63	4.22	1.93722083719849e-39	3.21567652038375e-38
CUT_GIM_0844	1635	1390	1485	1130	514	573	1199	1509	1141	1354	1447	1300	1302	585	563	1211	1228	1115	1122.75	1367	817	1185	0.576	-0.796	0.00365908900130514	0.00586397614773065
CUT_GIM_0845	4	2	3	14	16	22	5	4	5	3	2	3	16	18	22	5	3	5	8.57	3	19	4	5.826	2.543	0.00013173125285809	0.000245207298646007
CUT_GIM_0846	28	14	16	11	17	8	6	8	10	23	15	14	13	19	8	6	7	10	12.66	17	13	8	0.785	-0.35	0.482522047514769	0.540265655577042
CUT_GIM_0847	4	2	4	3	2	0	6	4	0	3	2	4	3	2	0	6	3	0	2.66	3	2	3	0.559	-0.838	0.363558127595545	0.421106182880518
CUT_GIM_0848	17	9	17	11	8	4	16	13	13	14	9	15	13	9	4	16	11	13	11.5	13	9	13	0.684	-0.548	0.297339369460877	0.351797901338443
CUT_GIM_0849	1	1	1	1	2	2	1	1	1	1	1	1	1	2	2	1	1	1	1.22	1	2	1	1.525	0.609	0.53463194597158	0.59107936808173
CUT_GIM_0850	48	35	44	174	90	208	81	95	81	40	36	39	200	102	204	82	77	79	95.58	38	169	79	4.213	2.075	4.94646053177891e-12	1.62783266050038e-11
CUT_GIM_0851	1	0	3	2	1	0	1	0	5	1	0	3	2	1	0	1	0	5	1.42	1	1	2	1.322	0.403	0.695863808951175	0.742771690847957
CUT_GIM_0852	10	6	8	80	21	39	11	10	9	8	6	7	92	24	38	11	8	9	22.66	7	51	9	5.975	2.579	2.20799760180446e-07	5.20950130722529e-07
CUT_GIM_0853	17	7	15	1	3	3	7	8	5	14	7	13	1	3	3	7	7	5	6.72	11	2	6	0.269	-1.895	0.00928744983897341	0.014172517474307
CUT_GIM_0854	34	15	22	29	19	30	29	17	17	28	16	19	33	22	29	29	14	17	23.03	21	28	20	1.327	0.408	0.277539460454156	0.331019201354079
CUT_GIM_0855	48	36	44	199	88	128	29	42	43	40	37	39	229	100	126	29	34	42	75.16	39	152	35	3.684	1.881	4.05583081707615e-08	1.01469575954511e-07
CUT_GIM_0856	1	1	2	0	1	1	1	0	2	1	1	2	0	1	1	1	0	2	0.97	1	1	1	0.747	-0.42	0.686073497783948	0.733460332549923
CUT_GIM_0857	5	2	8	21	8	9	2	4	3	4	2	7	24	9	9	2	3	3	7.06	4	14	3	2.663	1.413	0.0376147036034123	0.0528514399794969
CUT_GIM_0858	4	6	13	12	2	6	6	9	7	3	6	11	14	2	6	6	7	7	7.02	7	7	7	1.012	0.017	0.979694860175394	0.983228627276679
CUT_GIM_0859	858	634	722	1110	955	1339	702	875	772	711	660	632	1279	1086	1316	709	712	755	873.24	668	1227	725	1.82	0.864	5.16769552331789e-07	1.183415439653e-06
CUT_GIM_0860	60	39	54	693	317	454	54	86	65	50	41	47	799	361	446	55	70	64	214.54	46	535	63	10.822	3.436	1.20860701631705e-28	1.08145341444725e-27
CUT_GIM_0861	414	363	395	250	328	333	262	385	327	343	378	346	288	373	327	265	313	320	328.04	356	329	299	0.925	-0.113	0.534812457692713	0.591223004502605
CUT_GIM_0862	6	5	3	23	9	15	2	7	2	5	5	3	27	10	15	2	6	2	8.22	4	17	3	3.528	1.819	0.00651237874476792	0.0101201672887444
CUT_GIM_0863	75	73	107	167	130	203	77	136	108	62	76	94	192	148	199	78	111	106	118.39	77	180	98	2.314	1.21	3.96626791016674e-06	8.46417216913962e-06
CUT_GIM_0864	0	1	0	2	0	1	0	0	0	0	1	0	2	0	1	0	0	0	0.48	0	1	0	1.429	0.515	0.608132380838938	0.661266865402794
CUT_GIM_0865	25	26	21	88	50	115	59	71	66	21	27	18	101	57	113	60	58	65	57.7	22	90	61	3.901	1.964	4.00355550893005e-08	1.00226113276257e-07
CUT_GIM_0866	16	15	19	177	100	140	33	37	43	13	16	17	204	114	138	33	30	42	67.36	15	152	35	9.372	3.228	7.89218823241946e-20	4.26981998537286e-19
CUT_GIM_0867	22	17	17	5	8	12	14	24	24	18	18	15	6	9	12	14	20	23	14.95	17	9	19	0.547	-0.871	0.0751403237398157	0.100536961669737
CUT_GIM_0868	4	1	5	10	2	6	2	5	3	3	1	4	12	2	6	2	4	3	4.16	3	7	3	1.841	0.881	0.254389073532354	0.30593709100536
CUT_GIM_0869	5	0	2	1	1	2	1	2	0	4	0	2	1	1	2	1	2	0	1.42	2	1	1	0.908	-0.14	0.887538854029434	0.909007804398595
CUT_GIM_0870	24	10	16	14	7	15	4	8	10	20	10	14	16	8	15	4	7	10	11.49	15	13	7	0.884	-0.178	0.720630025908606	0.764667436917096
CUT_GIM_0871	4	3	7	1	2	2	6	1	2	3	3	6	1	2	2	6	1	2	2.98	4	2	3	0.549	-0.864	0.312979207447727	0.368511336849788
CUT_GIM_0872	56	50	55	214	261	265	74	76	77	46	52	48	247	297	260	75	62	75	129.14	49	268	71	5.379	2.427	1.54853600416899e-22	9.77644070487242e-22
CUT_GIM_0873	3	1	1	2	1	3	2	3	3	2	1	1	2	1	3	2	2	3	2.02	1	2	2	1.294	0.372	0.678997528836559	0.727292861776721
CUT_GIM_0874	19	13	26	3	2	6	5	6	7	16	14	23	3	2	6	5	5	7	8.94	18	4	6	0.253	-1.98	0.00167223029176236	0.00278252644020146
CUT_GIM_0875	5	2	2	6	3	3	1	3	7	4	2	2	7	3	3	1	2	7	3.5	3	4	3	1.457	0.543	0.499537552981341	0.556833252287377
CUT_GIM_0876	19629	15814	18633	18915	24797	17100	15520	19134	15114	16256	16460	16308	21795	28201	16805	15680	15572	14771	17983.03	16341	22267	15341	1.33	0.412	0.037214409255782	0.0523456411366235
CUT_GIM_0877	27	19	21	39	26	53	27	28	32	22	20	18	45	30	52	27	23	31	29.83	20	42	27	1.991	0.993	0.00639134523169085	0.00994133640057757
CUT_GIM_0878	4	3	4	26	15	28	14	13	11	3	3	4	30	17	28	14	11	11	13.33	3	25	12	6.477	2.695	4.88598977747527e-06	1.03419084476682e-05
CUT_GIM_0879	1	2	0	0	0	0	3	0	1	1	2	0	0	0	0	3	0	1	0.77	1	0	1	0.574	-0.8	0.452646340436711	0.511519691939213
CUT_GIM_0880	1	0	0	0	0	0	0	1	1	1	0	0	0	0	0	0	1	1	0.29	0	0	1	0.895	-0.16	0.862902305854948	NA
CUT_GIM_0881	5	3	6	10	2	6	2	8	3	4	3	5	12	2	6	2	7	3	4.85	4	7	4	1.387	0.472	0.514830087184384	0.571620370435793
CUT_GIM_0882	26	21	21	7	4	10	18	28	18	22	22	18	8	5	10	18	23	18	15.86	21	8	20	0.394	-1.343	0.00753408053533751	0.0116244078605696
CUT_GIM_0883	0	0	0	3	2	4	2	0	1	0	0	0	3	2	4	2	0	1	1.41	0	3	1	5.559	2.475	0.0254995511446576	0.0367764228035595
CUT_GIM_0884	51	25	53	131	70	188	75	73	98	42	26	46	151	80	185	76	59	96	84.55	38	139	77	3.484	1.801	6.55683491549405e-11	1.99903920747361e-10
CUT_GIM_0885	0	0	2	1	0	0	0	0	0	0	0	2	1	0	0	0	0	0	0.32	1	0	0	0.962	-0.056	0.952002141945031	NA
CUT_GIM_0886	110	90	87	237	119	335	129	122	143	91	94	76	273	135	329	130	99	140	151.99	87	246	123	2.621	1.39	4.12410355315065e-06	8.78655863666699e-06
CUT_GIM_0887	0	1	1	5	3	9	5	1	1	0	1	1	6	3	9	5	1	1	2.98	1	6	2	5.014	2.326	0.0203683235480653	0.0297716358952709
CUT_GIM_0888	13	6	8	17	5	19	7	5	4	11	6	7	20	6	19	7	4	4	9.22	8	15	5	1.641	0.715	0.195091580180945	0.240616380579897
CUT_GIM_0889	41	21	21	19	20	13	23	22	21	34	22	18	22	23	13	23	18	21	21.47	25	19	21	0.796	-0.33	0.407300614569887	0.466821791081178
CUT_GIM_0890	30	36	44	578	218	426	61	89	70	25	37	39	666	248	419	62	72	68	181.76	34	444	67	11.996	3.584	1.11103963970391e-22	7.0793943454634e-22
CUT_GIM_0891	48	40	63	1091	190	401	106	112	112	40	42	55	1257	216	394	107	91	109	256.83	46	622	102	10.328	3.368	4.44844298347844e-15	1.81573540708799e-14
CUT_GIM_0892	42	26	28	2	9	6	22	31	18	35	27	25	2	10	6	22	25	18	18.87	29	6	22	0.229	-2.127	5.68905438494969e-05	0.000109471907693927
CUT_GIM_0893	219	147	205	1501	761	1839	269	250	282	181	153	179	1730	865	1807	272	203	276	629.66	171	1467	250	8.075	3.013	7.49425692669217e-40	1.26740790803654e-38
CUT_GIM_0894	3	2	7	10	14	18	10	14	21	2	2	6	12	16	18	10	11	21	10.87	3	15	14	3.851	1.945	0.00153702275206495	0.00257219646006459
CUT_GIM_0895	118	102	133	215	114	212	99	119	95	98	106	116	248	130	208	100	97	93	132.86	107	195	97	1.761	0.817	0.00223091107761869	0.00366157680520394
CUT_GIM_0896	226	221	251	31	14	35	122	179	140	187	230	220	36	16	34	123	146	137	125.41	212	29	135	0.14	-2.838	4.46542433468256e-19	2.30185040913544e-18
CUT_GIM_0897	143	104	105	134	61	53	111	128	117	118	108	92	154	69	52	112	104	114	102.79	106	92	110	0.823	-0.281	0.370721371860584	0.428638562537131
CUT_GIM_0898	6	6	2	46	32	38	16	12	9	5	6	2	53	36	37	16	10	9	19.38	4	42	12	8.897	3.153	5.03588919574759e-09	1.33961759939691e-08
CUT_GIM_0899	8144	6637	8415	7116	9117	6161	7009	8348	6837	6744	6908	7365	8199	10369	6055	7081	6794	6682	7355.23	7006	8208	6852	1.148	0.199	0.346231528962147	0.403275356070133
CUT_GIM_0900	9	3	6	5	3	7	2	9	4	7	3	5	6	3	7	2	7	4	5.01	5	5	4	1.004	0.006	0.992668784714235	0.993518963529509
CUT_GIM_0901	5	9	12	17	4	5	6	6	6	4	9	11	20	5	5	6	5	6	7.76	8	10	6	1.059	0.082	0.896782925478511	0.916710381190362
CUT_GIM_0902	7	5	7	0	3	2	8	5	3	6	5	6	0	3	2	8	4	3	4.18	6	2	5	0.401	-1.319	0.113576689779093	0.147080806378378
CUT_GIM_0903	12	15	19	114	45	72	26	35	23	10	16	17	131	51	71	26	28	22	41.41	14	84	25	5.412	2.436	2.03129335115284e-08	5.18856701673707e-08
CUT_GIM_0904	4	1	1	4	2	2	0	2	0	3	1	1	5	2	2	0	2	0	1.75	2	3	1	1.455	0.541	0.564688697910073	0.619910955732937
CUT_GIM_0905	24	17	25	4	11	15	12	20	16	20	18	22	5	13	15	12	16	16	15.04	20	11	15	0.548	-0.868	0.0717446032353288	0.0962690818013609
CUT_GIM_0906	12	13	16	1	7	2	11	11	19	10	14	14	1	8	2	11	9	19	9.69	13	4	13	0.325	-1.621	0.0169090554448874	0.025022061786622
CUT_GIM_0907	2	0	2	1	0	11	4	6	6	2	0	2	1	0	11	4	5	6	3.35	1	4	5	1.862	0.897	0.342945314405055	0.399806359151783
CUT_GIM_0908	13	10	23	10	9	8	17	13	12	11	10	20	12	10	8	17	11	12	12.27	14	10	13	0.753	-0.409	0.419447777926427	0.478678391879709
CUT_GIM_0909	2	3	4	0	0	0	2	2	1	2	3	4	0	0	0	2	2	1	1.43	3	0	2	0.205	-2.29	0.0357323216534532	0.0504132898786834
CUT_GIM_0910	129	92	82	109	52	74	73	85	52	107	96	72	126	59	73	74	69	51	80.62	92	86	65	0.926	-0.111	0.689582363377934	0.736672410497717
CUT_GIM_0911	1	0	2	8	2	5	0	0	0	1	0	2	9	2	5	0	0	0	2.11	1	5	0	3.495	1.805	0.0763926793816602	0.102142431493602
CUT_GIM_0912	6	0	5	4	4	7	0	1	2	5	0	4	5	5	7	0	1	2	3.13	3	6	1	1.641	0.715	0.392836778421972	0.45201758493887
CUT_GIM_0913	1	1	0	6	0	4	0	0	3	1	1	0	7	0	4	0	0	3	1.74	1	4	1	2.194	1.133	0.279407232221975	0.333016271965816
CUT_GIM_0914	2	0	2	1	0	0	0	1	1	2	0	2	1	0	0	0	1	1	0.71	1	0	1	0.676	-0.564	0.597711347859857	0.651329243853999
CUT_GIM_0915	1	0	4	19	8	10	3	6	0	1	0	4	22	9	10	3	5	0	5.9	2	14	3	5.626	2.492	0.00556420510121494	0.0087267884596427
CUT_GIM_0916	15	8	5	14	9	13	5	9	6	12	8	4	16	10	13	5	7	6	9.17	8	13	6	1.509	0.593	0.278513810607238	0.332079623584959
CUT_GIM_0917	3842	2805	3336	961	2249	1386	2490	2702	2713	3182	2920	2920	1107	2558	1362	2516	2199	2652	2379.36	3007	1676	2456	0.548	-0.867	0.00216987451858441	0.00356540405289334
CUT_GIM_0918	0	0	0	0	0	0	0	0	0	0	0	0	0	0	0	0	0	0	0	0	0	0	1	0	NA	NA
CUT_GIM_0919	6	5	8	2	0	3	4	2	5	5	5	7	2	0	3	4	2	5	3.66	6	2	4	0.361	-1.468	0.0836331787808905	0.110834353281185
CUT_GIM_0920	1	0	0	1	0	0	0	1	1	1	0	0	1	0	0	0	1	1	0.42	0	0	1	1.067	0.093	0.927382700585023	0.941972554457765
CUT_GIM_0921	2	0	4	7	5	3	1	1	3	2	0	4	8	6	3	1	1	3	2.96	2	6	2	2.819	1.495	0.0983695223387526	0.128690959738649
CUT_GIM_0922	8	4	8	24	12	23	4	2	4	7	4	7	28	14	23	4	2	4	10.14	6	22	3	3.241	1.697	0.00250689592885552	0.00409041969067378
CUT_GIM_0923	107	94	97	52	44	75	63	83	80	89	98	85	60	50	74	64	68	78	73.82	91	61	70	0.685	-0.546	0.0425810699047433	0.0593155520116373
CUT_GIM_0924	1	0	1	3	0	0	0	1	0	1	0	1	3	0	0	0	1	0	0.66	1	1	0	1.063	0.088	0.933492121504792	0.946779112298646
CUT_GIM_0925	2	5	4	0	2	0	2	4	2	2	5	4	0	2	0	2	3	2	2.21	4	1	2	0.322	-1.636	0.104172690854176	0.135760239246336
CUT_GIM_0926	0	0	0	0	0	1	0	0	0	0	0	0	0	0	1	0	0	0	0.11	0	0	0	1.203	0.267	0.773523464153056	NA
CUT_GIM_0927	28	12	23	695	159	277	28	37	33	23	12	20	801	181	272	28	30	32	155.59	18	418	30	18.11	4.179	1.44343379823802e-24	1.03866794126905e-23
CUT_GIM_0928	0	0	0	1	0	0	0	0	1	0	0	0	1	0	0	0	0	1	0.24	0	0	0	1.211	0.277	0.76514918656751	NA
CUT_GIM_0929	64	40	53	238	146	390	86	65	72	53	42	46	274	166	383	87	53	70	130.53	47	274	70	5.497	2.459	1.07617549902972e-17	5.12268304751986e-17
CUT_GIM_0930	12	9	6	38	11	18	8	9	9	10	9	5	44	13	18	8	7	9	13.64	8	25	8	2.597	1.377	0.0105474340543584	0.0159846082686075
CUT_GIM_0931	1	4	4	7	3	4	3	4	3	1	4	4	8	3	4	3	3	3	3.68	3	5	3	1.617	0.693	0.370014010855927	0.427905366735513
CUT_GIM_0932	1	4	7	18	14	20	3	4	7	1	4	6	21	16	20	3	3	7	8.95	4	19	4	4.752	2.248	0.000735097503917466	0.00127076175011531
CUT_GIM_0933	13	8	4	1	5	3	5	6	4	11	8	4	1	6	3	5	5	4	5.14	8	3	5	0.513	-0.964	0.182630212920178	0.226658524658581
CUT_GIM_0934	50	61	57	770	500	1059	346	410	356	41	63	50	887	569	1041	350	334	348	409.17	51	832	344	15.31	3.936	1.6785563746044e-43	3.42930241147325e-42
CUT_GIM_0935	55	39	33	226	94	229	53	75	87	46	41	29	260	107	225	54	61	85	100.78	39	197	67	4.753	2.249	3.66535306169046e-10	1.05345095619564e-09
CUT_GIM_0936	8	4	13	3	3	13	10	5	3	7	4	11	3	3	13	10	4	3	6.55	7	6	6	0.893	-0.163	0.806770885213897	0.840953042958666
CUT_GIM_0937	20	6	6	6	2	6	8	5	9	17	6	5	7	2	6	8	4	9	7.12	9	5	7	0.604	-0.728	0.250617295754754	0.302116125251708
CUT_GIM_0938	0	0	0	1	0	0	0	2	0	0	0	0	1	0	0	0	2	0	0.31	0	0	1	1.221	0.288	0.756032332397764	NA
CUT_GIM_0939	8	2	3	12	0	7	4	3	0	7	2	3	14	0	7	4	2	0	4.28	4	7	2	1.433	0.519	0.52304598240742	0.579916067401623
CUT_GIM_0940	3	1	4	3	3	0	1	1	2	2	1	4	3	3	0	1	1	2	1.96	2	2	1	0.978	-0.032	0.972439241439318	0.977289729571712
CUT_GIM_0941	468	297	303	1375	451	1094	325	424	324	388	309	265	1584	513	1075	328	345	317	569.37	321	1057	330	3.065	1.616	2.0506491334412e-07	4.84902585459204e-07
CUT_GIM_0942	20	10	22	15	13	39	10	16	16	17	10	19	17	15	38	10	13	16	17.26	15	23	13	1.404	0.49	0.263510738520499	0.315802121869608
CUT_GIM_0943	6	6	5	51	17	27	9	5	6	5	6	4	59	19	27	9	4	6	15.47	5	35	6	5.573	2.478	7.64577357044343e-06	1.59124683783084e-05
CUT_GIM_0944	2	0	6	0	1	6	3	3	1	2	0	5	0	1	6	3	2	1	2.27	2	2	2	0.994	-0.009	0.992411886637786	0.993346921391791
CUT_GIM_0945	19	17	18	0	1	0	11	9	7	16	18	16	0	1	0	11	7	7	8.4	17	0	8	0.059	-4.083	4.12261320709137e-05	8.06712289652875e-05
CUT_GIM_0946	0	0	0	0	0	0	1	0	0	0	0	0	0	0	0	1	0	0	0.11	0	0	0	1	0	1	NA
CUT_GIM_0947	4	1	4	3	2	0	1	3	0	3	1	4	3	2	0	1	2	0	1.89	3	2	1	0.637	-0.651	0.498438120821002	0.55579655342693
CUT_GIM_0948	1713	1102	1016	213	214	322	734	991	847	1419	1147	889	245	243	316	742	807	828	737.33	1152	268	792	0.238	-2.072	1.3998656555234e-17	6.62300811758964e-17
CUT_GIM_0949	1	0	2	5	6	5	2	1	2	1	0	2	6	7	5	2	1	2	2.76	1	6	2	4.388	2.134	0.0264222904113127	0.0380353394612712
CUT_GIM_0950	33	25	22	37	33	21	16	17	21	27	26	19	43	38	21	16	14	21	24.88	24	34	17	1.332	0.413	0.289833268439945	0.343926845551299
CUT_GIM_0951	97	87	103	79	51	100	154	179	186	80	91	90	91	58	98	156	146	182	110.15	87	82	161	0.939	-0.09	0.722969577635358	0.766732233800416
CUT_GIM_0952	132	110	208	802	404	486	105	138	124	109	114	182	924	459	478	106	112	121	289.62	135	620	113	4.39	2.134	1.71411621399024e-11	5.44621046130777e-11
CUT_GIM_0953	17	7	4	9	7	11	27	27	17	14	7	4	10	8	11	27	22	17	13.32	8	10	22	1.226	0.294	0.572110435089445	0.626821914912362
CUT_GIM_0954	68	60	71	1251	608	1019	256	285	267	56	62	62	1441	691	1001	259	232	261	451.87	60	1044	251	16.186	4.017	2.04734717666917e-50	5.62948214271904e-49
CUT_GIM_0955	8	5	8	4	5	6	4	1	1	7	5	7	5	6	6	4	1	1	4.54	6	6	2	0.902	-0.149	0.826186793660614	0.857139459403225
CUT_GIM_0956	7	3	1	61	20	92	10	8	6	6	3	1	70	23	90	10	7	6	23.97	3	61	8	14.477	3.856	1.62809431776816e-09	4.47668475233853e-09
CUT_GIM_0957	132	99	97	447	419	484	128	160	85	109	103	85	515	477	476	129	130	83	234.12	99	489	114	4.901	2.293	4.82411235967164e-24	3.34567222760372e-23
CUT_GIM_0958	8	11	12	6	4	5	5	8	9	7	11	11	7	5	5	5	7	9	7.26	10	6	7	0.633	-0.659	0.272108082168639	0.325005626351463
CUT_GIM_0959	8563	6888	8692	3049	6383	4177	6537	7364	7046	7091	7169	7607	3513	7259	4105	6604	5993	6886	6247.67	7289	4959	6494	0.671	-0.577	0.0235349597322193	0.0341143065530531
CUT_GIM_0960	13	12	5	73	30	53	8	10	9	11	12	4	84	34	52	8	8	9	24.77	9	57	8	5.645	2.497	3.33670308991429e-07	7.7721172630533e-07
CUT_GIM_0961	63	34	54	163	171	229	101	111	84	52	35	47	188	194	225	102	90	82	112.96	45	202	91	4.429	2.147	4.84562669464784e-16	2.10192997600797e-15
CUT_GIM_0962	634	441	543	768	485	747	527	434	549	525	459	475	885	552	734	532	353	537	561.35	486	724	474	1.448	0.534	0.00622844156382512	0.00969956931168182
CUT_GIM_0963	20	5	5	15	4	12	11	10	8	17	5	4	17	5	12	11	8	8	9.65	9	11	9	1.287	0.364	0.514764490064665	0.571601846341284
CUT_GIM_0964	2	1	1	5	2	4	7	3	0	2	1	1	6	2	4	7	2	0	2.78	1	4	3	2.495	1.319	0.154370630492361	0.194505480395554
CUT_GIM_0965	9	9	12	5	5	8	8	6	3	7	9	11	6	6	8	8	5	3	6.95	9	7	5	0.751	-0.413	0.490274373917473	0.547895795505364
CUT_GIM_0966	24	17	22	3	2	4	13	11	16	20	18	19	3	2	4	13	9	16	11.58	19	3	13	0.195	-2.357	0.000169622843948341	0.000312405445922824
CUT_GIM_0967	27	13	14	53	31	63	25	24	20	22	14	12	61	35	62	25	20	20	30.08	16	53	22	3.173	1.666	1.82754466312025e-05	3.67964971282275e-05
CUT_GIM_0968	3	3	1	10	2	4	2	4	4	2	3	1	12	2	4	2	3	4	3.71	2	6	3	2.102	1.072	0.190690524394443	0.235630366430966
CUT_GIM_0969	0	1	1	6	1	1	0	0	1	0	1	1	7	1	1	0	0	1	1.33	1	3	0	2.347	1.231	0.243894526385066	0.294619747295419
CUT_GIM_0970	35	30	23	497	175	467	59	60	54	29	31	20	573	199	459	60	49	53	163.58	27	410	54	13.65	3.771	7.23692753907081e-26	5.62679542392425e-25
CUT_GIM_0971	1	0	1	2	1	4	2	2	3	1	0	1	2	1	4	2	2	3	1.74	1	2	2	2.5	1.322	0.187682643598421	0.232386032325827
CUT_GIM_0972	6	2	6	32	17	31	5	7	1	5	2	5	37	19	30	5	6	1	12.3	4	29	4	5.96	2.575	3.3190888125086e-05	6.54962375261322e-05
CUT_GIM_0973	8	1	3	6	1	8	5	5	4	7	1	3	7	1	8	5	4	4	4.36	4	5	4	1.424	0.51	0.496493643626769	0.553945457267751
CUT_GIM_0974	44	65	39	97	83	163	46	84	50	36	68	34	112	94	160	46	68	49	74.25	46	122	54	2.669	1.416	4.8417942303911e-05	9.39887165720107e-05
CUT_GIM_0975	34	21	30	30	17	22	32	22	31	28	22	26	35	19	22	32	18	30	25.81	25	25	27	0.976	-0.035	0.923011289494855	0.938674608740482
CUT_GIM_0976	12	16	33	201	65	146	37	28	50	10	17	29	232	74	143	37	23	49	68.17	19	150	36	7.304	2.869	1.57759122255314e-11	5.02884097838405e-11
CUT_GIM_0977	31	16	14	118	41	88	29	29	23	26	17	12	136	47	86	29	24	22	44.34	18	90	25	4.602	2.202	8.37115132066155e-09	2.1963465274641e-08
CUT_GIM_0978	2	2	6	0	12	13	2	3	4	2	2	5	0	14	13	2	2	4	4.86	3	9	3	2.028	1.02	0.191376256894827	0.236358374347172
CUT_GIM_0979	46	37	42	100	95	264	121	143	137	38	39	37	115	108	259	122	116	134	107.62	38	161	124	3.902	1.964	1.94352431570449e-09	5.31648528869914e-09
CUT_GIM_0980	15	5	18	20	15	17	6	9	13	12	5	16	23	17	17	6	7	13	12.92	11	19	9	1.67	0.74	0.141259668619408	0.179469502879583
CUT_GIM_0981	1	0	0	0	0	1	1	2	2	1	0	0	0	0	1	1	2	2	0.71	0	0	2	1.077	0.107	0.919586692562429	0.935795132535718
CUT_GIM_0982	1	1	2	25	13	15	3	6	3	1	1	2	29	15	15	3	5	3	8.09	1	20	4	10.594	3.405	2.57058089628454e-05	5.12275040142925e-05
CUT_GIM_0983	0	1	2	1	0	1	0	0	0	0	1	2	1	0	1	0	0	0	0.55	1	1	0	0.923	-0.115	0.912738100453058	0.929845474840418
CUT_GIM_0984	38	76	120	58	52	59	74	115	90	31	79	105	67	59	58	75	94	88	72.87	72	61	86	0.923	-0.116	0.738859492311581	0.780679206795039
CUT_GIM_0985	17	17	26	150	86	167	29	35	35	14	18	23	173	98	164	29	28	34	64.59	18	145	30	7.579	2.922	1.13340590021684e-17	5.38851967043693e-17
CUT_GIM_0986	218	194	225	800	313	603	205	204	238	181	202	197	922	356	593	207	166	233	339.5	193	624	202	2.982	1.576	6.61718879437226e-08	1.62352442265451e-07
CUT_GIM_0987	988	862	1158	121	59	71	667	822	819	818	897	1013	139	67	70	674	669	800	572.05	909	92	714	0.102	-3.29	5.54489146791136e-30	5.40881483255527e-29
CUT_GIM_0988	1	0	3	0	1	0	2	3	1	1	0	3	0	1	0	2	2	1	1.11	1	0	2	0.565	-0.823	0.439830228842194	0.498821433836362
CUT_GIM_0989	71	48	24	36	22	28	42	29	36	59	50	21	41	25	28	42	24	35	36.11	43	31	34	0.76	-0.396	0.296354040624009	0.350845235410006
CUT_GIM_0990	2	5	5	18	18	12	4	2	9	2	5	4	21	20	12	4	2	9	8.75	4	18	5	4.163	2.058	0.00322801056008646	0.00520235534527901
CUT_GIM_0991	0	4	5	1	1	2	0	2	0	0	4	4	1	1	2	0	2	0	1.6	3	1	1	0.806	-0.311	0.75234313385254	0.792775641316572
CUT_GIM_0992	1514	1220	1538	1714	1402	2081	1100	1433	1238	1254	1270	1346	1975	1594	2045	1111	1166	1210	1441.3	1290	1871	1162	1.437	0.523	0.00200840496895545	0.00331406671381154
CUT_GIM_0993	13	7	10	19	22	38	10	13	11	11	7	9	22	25	37	10	11	11	15.83	9	28	11	2.902	1.537	0.00132210525786736	0.00222945484032293
CUT_GIM_0994	3	5	5	12	4	10	5	8	2	2	5	4	14	5	10	5	7	2	5.98	4	10	5	2.034	1.024	0.141483131104258	0.179714333704822
CUT_GIM_0995	5053	3703	4198	6252	5562	8796	4452	5308	4550	4185	3854	3674	7204	6326	8644	4498	4320	4447	5239.03	3904	7391	4422	1.867	0.901	5.1984833821023e-07	1.19023269598839e-06
CUT_GIM_0996	801	566	702	228	312	340	531	591	646	663	589	614	263	355	334	536	481	631	496.37	622	317	549	0.514	-0.96	4.74166481564424e-06	1.00491648595609e-05
CUT_GIM_0997	15	9	8	12	5	15	6	9	8	12	9	7	14	6	15	6	7	8	9.36	9	12	7	1.143	0.193	0.720239048900308	0.764321969256175
CUT_GIM_0998	0	0	0	0	0	1	1	1	0	0	0	0	0	0	1	1	1	0	0.31	0	0	1	1.218	0.284	0.760945146441338	NA
CUT_GIM_0999	13	11	5	15	8	5	9	7	16	11	11	4	17	9	5	9	6	16	9.81	9	10	10	1.113	0.154	0.795829237314284	0.831104599397205
CUT_GIM_1000	0	0	0	4	4	0	1	3	1	0	0	0	5	5	0	1	2	1	1.51	0	3	1	4.39	2.134	0.0525314815253516	0.0720519827588332
CUT_GIM_1001	185	162	195	31	18	47	144	121	121	153	169	171	36	20	46	145	98	118	106.34	164	34	120	0.209	-2.256	3.11426099192267e-13	1.11567302120197e-12
CUT_GIM_1002	2	2	2	2	0	3	1	1	2	2	2	2	2	0	3	1	1	2	1.61	2	2	1	0.88	-0.185	0.843652643883002	0.871955323594063
CUT_GIM_1003	73	56	75	189	113	250	67	103	76	60	58	66	218	129	246	68	84	74	111.35	61	198	75	3.098	1.631	2.03769781076153e-08	5.20378859627606e-08
CUT_GIM_1004	3	3	1	8	1	4	1	1	0	2	3	1	9	1	4	1	1	0	2.51	2	5	1	1.733	0.794	0.365247108046684	0.4228110653426
CUT_GIM_1005	39	35	32	24	37	33	24	27	25	32	36	28	28	42	32	24	22	24	29.95	32	34	23	1.049	0.069	0.840414576096356	0.869122543032037
CUT_GIM_1006	1	2	1	2	1	3	2	2	0	1	2	1	2	1	3	2	2	0	1.54	1	2	1	1.5	0.585	0.542636899404755	0.598853036778163
CUT_GIM_1007	8	13	12	45	22	30	7	18	9	7	14	11	52	25	29	7	15	9	18.61	11	35	10	3.276	1.712	0.000859968262007661	0.00147722903275342
CUT_GIM_1008	1	2	2	0	2	3	1	4	1	1	2	2	0	2	3	1	3	1	1.68	2	2	2	1.005	0.008	0.993522742975626	0.994288496567026
CUT_GIM_1009	15	7	13	304	124	251	32	27	35	12	7	11	350	141	247	32	22	34	95.29	10	246	29	21.536	4.429	9.52769736781303e-36	1.28125053441039e-34
CUT_GIM_1010	67	53	67	164	101	212	62	90	72	55	55	59	189	115	208	63	73	70	98.64	56	171	69	2.926	1.549	5.27213121922873e-08	1.30474640889257e-07
CUT_GIM_1011	12	5	7	4	1	10	4	7	4	10	5	6	5	1	10	4	6	4	5.61	7	5	5	0.745	-0.425	0.536724723071425	0.592944329156047
CUT_GIM_1012	3	3	1	0	0	2	0	0	2	2	3	1	0	0	2	0	0	2	1.16	2	1	1	0.38	-1.395	0.196258757462907	0.2418517177804
CUT_GIM_1013	20	8	27	21	28	22	16	18	15	17	8	24	24	32	22	16	15	15	19.07	16	26	15	1.553	0.635	0.158179486568255	0.198911597980914
CUT_GIM_1014	49	30	35	16	13	23	32	29	31	41	31	31	18	15	23	32	24	30	27.17	34	19	29	0.567	-0.82	0.0285435626628177	0.0408724510816919
CUT_GIM_1015	0	1	1	2	0	1	2	2	4	0	1	1	2	0	1	2	2	4	1.42	1	1	3	1.348	0.431	0.674627150692481	0.723141889836023
CUT_GIM_1016	7	4	3	25	18	19	5	10	13	6	4	3	29	20	19	5	8	13	11.83	4	23	9	4.711	2.236	0.000239204552587547	0.000434194532702403
CUT_GIM_1017	36	18	34	1284	131	256	14	25	19	30	19	30	1480	149	252	14	20	19	223.49	26	627	18	14.808	3.888	1.201363946645e-13	4.43574694486365e-13
CUT_GIM_1018	14	19	23	177	61	99	30	52	42	12	20	20	204	69	97	30	42	41	59.53	17	123	38	6.455	2.691	1.8366920853702e-09	5.03013445269186e-09
CUT_GIM_1019	66	57	68	113	62	99	107	140	116	55	59	60	130	71	97	108	114	113	89.66	58	99	112	1.661	0.732	0.00964446446671284	0.0146866317120154
CUT_GIM_1020	7	3	3	16	23	30	4	5	4	6	3	3	18	26	29	4	4	4	10.85	4	24	4	5.526	2.466	5.62636360617724e-05	0.000108354787577105
CUT_GIM_1021	8	4	6	1	0	7	4	5	3	7	4	5	1	0	7	4	4	3	3.9	5	3	4	0.52	-0.945	0.255831245813414	0.307450014250879
CUT_GIM_1022	1319	1234	1564	1299	434	397	874	1043	1011	1092	1284	1369	1497	494	390	883	849	988	982.88	1248	794	907	0.582	-0.782	0.0337193473476746	0.0477919094123621
CUT_GIM_1023	0	2	2	1	0	0	0	0	0	0	2	2	1	0	0	0	0	0	0.55	1	0	0	0.672	-0.574	0.575058359903871	0.629579538489474
CUT_GIM_1024	9	11	9	24	15	10	6	14	6	7	11	8	28	17	10	6	11	6	11.63	9	18	8	1.841	0.88	0.0963698143953092	0.126338080662282
CUT_GIM_1025	251	184	160	256	292	158	171	214	208	208	192	140	295	332	155	173	174	203	208	180	261	183	1.4	0.486	0.0784515678869726	0.104596123482848
CUT_GIM_1026	3291	2820	3000	2636	1917	1597	2614	4126	2762	2725	2935	2626	3037	2180	1569	2641	3358	2699	2641.26	2762	2262	2899	0.809	-0.307	0.184180097119377	0.228339551765016
CUT_GIM_1027	38	46	33	431	145	229	151	168	158	31	48	29	497	165	225	153	137	154	159.83	36	296	148	7.258	2.86	3.39073383168515e-14	1.30171207480528e-13
CUT_GIM_1028	1	2	2	0	1	4	3	3	0	1	2	2	0	1	4	3	2	0	1.69	2	2	2	1.025	0.035	0.97148983430662	0.976503544100048
CUT_GIM_1029	0	1	1	0	0	0	1	3	1	0	1	1	0	0	0	1	2	1	0.71	1	0	1	0.64	-0.643	0.547632842336421	0.603198998918005
CUT_GIM_1030	2305	1881	1975	2052	1261	877	1647	2135	1445	1909	1958	1729	2364	1434	862	1664	1738	1412	1674.37	1865	1553	1605	0.792	-0.336	0.197005370198711	0.242669416690432
CUT_GIM_1031	80	62	48	25	23	24	49	51	59	66	65	42	29	26	24	50	42	58	44.45	58	26	50	0.472	-1.083	0.00172793088893556	0.00287153020024189
CUT_GIM_1032	1	1	1	1	2	3	3	0	1	1	1	1	1	2	3	3	0	1	1.46	1	2	1	1.75	0.808	0.416425119732417	0.475786463550355
CUT_GIM_1033	8	4	3	29	3	19	5	8	5	7	4	3	33	3	19	5	7	5	9.48	5	18	6	3.216	1.685	0.0143398817704026	0.0213935731353152
CUT_GIM_1034	1	0	0	1	1	0	2	0	0	1	0	0	1	1	0	2	0	0	0.57	0	1	1	1.382	0.467	0.657668781296525	0.707951121797273
CUT_GIM_1035	0	2	2	1	0	1	1	0	0	0	2	2	1	0	1	1	0	0	0.78	1	1	0	0.696	-0.522	0.624524949846559	0.677389879701772
CUT_GIM_1036	5	7	4	37	22	77	20	15	5	4	7	4	43	25	76	20	12	5	21.73	5	48	12	8.107	3.019	1.27779088870437e-06	2.82754484480198e-06
CUT_GIM_1037	26	14	26	122	25	42	32	37	43	22	15	23	141	28	41	32	30	42	41.51	20	70	35	2.93	1.551	0.000832059845059694	0.00143139280868064
CUT_GIM_1038	2	2	0	8	7	5	1	1	0	2	2	0	9	8	5	1	1	0	3.07	1	7	1	4.478	2.163	0.0203407533130499	0.0297387768317654
CUT_GIM_1039	6	6	4	1	1	4	3	6	4	5	6	4	1	1	4	3	5	4	3.64	5	2	4	0.508	-0.977	0.224772217295474	0.273670361670651
CUT_GIM_1040	12	15	16	3	5	7	13	5	7	10	16	14	3	6	7	13	4	7	8.85	13	5	8	0.457	-1.131	0.0703123153488912	0.0944882379447037
CUT_GIM_1041	7	8	3	18	3	8	5	7	1	6	8	3	21	3	8	5	6	1	6.72	6	11	4	1.709	0.773	0.258983716170386	0.310791097470438
CUT_GIM_1042	11	5	4	10	5	5	11	6	8	9	5	4	12	6	5	11	5	8	7.08	6	8	8	1.195	0.257	0.665934007203234	0.715266986045679
CUT_GIM_1043	0	0	0	0	1	0	1	0	0	0	0	0	0	1	0	1	0	0	0.24	0	0	0	1.211	0.277	0.765149244439196	NA
CUT_GIM_1044	48	33	52	7	13	8	24	18	21	40	34	46	8	15	8	24	15	21	23.3	40	10	20	0.273	-1.873	4.42505757358161e-05	8.62141093779172e-05
CUT_GIM_1045	146	91	132	2203	964	1581	270	263	247	121	95	116	2538	1096	1554	273	214	241	694.21	111	1729	243	14.591	3.867	2.98063306379124e-58	1.29485791760091e-56
CUT_GIM_1046	15	9	8	6	10	22	7	11	14	12	9	7	7	11	22	7	9	14	10.93	9	13	10	1.236	0.305	0.569984237545025	0.624843883672717
CUT_GIM_1047	13625	11093	14225	13171	12894	12556	10588	13385	11726	11284	11546	12450	15176	14664	12339	10697	10893	11460	12278.83	11760	14060	11017	1.19	0.251	0.139906421139063	0.178040557272251
CUT_GIM_1048	135	116	126	2650	586	1430	182	230	193	112	121	110	3053	666	1405	184	187	189	669.75	114	1708	187	12.374	3.629	1.04331017481582e-21	6.27166805704612e-21
CUT_GIM_1049	38	21	26	77	19	47	13	22	16	31	22	23	89	22	46	13	18	16	31.03	25	52	16	1.831	0.873	0.0422065296946314	0.0588504362261619
CUT_GIM_1050	1	1	2	0	0	0	2	0	0	1	1	2	0	0	0	2	0	0	0.63	1	0	1	0.47	-1.09	0.308812916928261	0.364045974702275
CUT_GIM_1051	64	47	54	51	63	84	112	99	80	53	49	47	59	72	83	113	81	78	70.45	50	71	91	1.41	0.496	0.0896088692845304	0.118017496501637
CUT_GIM_1052	0	0	0	1	0	0	0	0	2	0	0	0	1	0	0	0	0	2	0.35	0	0	1	1.242	0.313	0.736169128045157	NA
CUT_GIM_1053	379	314	283	32	46	58	166	153	155	314	327	248	37	52	57	168	125	151	164.25	296	49	148	0.17	-2.558	9.0726713270206e-20	4.87463159207185e-19
CUT_GIM_1054	29	36	36	9	14	28	61	84	69	24	37	32	10	16	28	62	68	67	38.25	31	18	66	0.595	-0.749	0.0488824735381472	0.067458737100471
CUT_GIM_1055	0	3	3	3	2	1	3	2	4	0	3	3	3	2	1	3	2	4	2.34	2	2	3	1.175	0.233	0.796983768473446	0.831938572432397
CUT_GIM_1056	6	5	3	1	3	1	1	1	2	5	5	3	1	3	1	1	1	2	2.46	4	2	1	0.525	-0.931	0.284664924133431	0.33852831863056
CUT_GIM_1057	28	14	27	73	30	65	20	20	22	23	15	24	84	34	64	20	16	22	33.5	21	61	19	2.796	1.483	4.71520138616803e-05	9.16073871966078e-05
CUT_GIM_1058	10	8	12	16	7	9	10	18	8	8	8	11	18	8	9	10	15	8	10.55	9	12	11	1.215	0.281	0.59868034403774	0.652202712820456
CUT_GIM_1059	16	10	14	46	24	16	2	2	4	13	10	12	53	27	16	2	2	4	15.5	12	32	3	2.324	1.217	0.0199024503513055	0.0291672980693951
CUT_GIM_1060	2	8	3	49	24	44	5	13	9	2	8	3	56	27	43	5	11	9	18.23	4	42	8	9.283	3.215	3.77405136476171e-07	8.75765771417899e-07
CUT_GIM_1061	9	8	11	11	5	4	9	15	8	7	8	10	13	6	4	9	12	8	8.54	8	8	10	0.856	-0.224	0.697869067127412	0.744708055743853
CUT_GIM_1062	0	0	1	2	1	0	0	0	0	0	0	1	2	1	0	0	0	0	0.48	0	1	0	1.451	0.537	0.593090299478688	0.64707807298179
CUT_GIM_1063	1847	1167	1323	420	596	639	1042	1211	1211	1530	1215	1158	484	678	628	1053	986	1184	990.41	1301	597	1074	0.464	-1.108	7.68127447397211e-07	1.72821281291563e-06
CUT_GIM_1064	15	8	15	14	8	15	2	6	4	12	8	13	16	9	15	2	5	4	9.41	11	13	4	1.148	0.199	0.701972784944804	0.747857960148143
CUT_GIM_1065	2	2	2	2	1	0	0	1	1	2	2	2	2	1	0	0	1	1	1.19	2	1	1	0.721	-0.473	0.637652279186236	0.689388892087182
CUT_GIM_1066	2	1	3	2	3	1	0	3	1	2	1	3	2	3	1	0	2	1	1.72	2	2	1	1.085	0.118	0.898174073260787	0.917789059218249
CUT_GIM_1067	21	20	22	68	36	69	22	19	23	17	21	19	78	41	68	22	15	22	33.86	19	62	20	3.071	1.619	1.33331387955214e-05	2.72444588152585e-05
CUT_GIM_1068	12	3	23	20	15	32	9	14	9	10	3	20	23	17	31	9	11	9	14.89	11	24	10	2.116	1.081	0.0397985793943311	0.0557389979388967
CUT_GIM_1069	0	0	0	0	0	0	0	0	0	0	0	0	0	0	0	0	0	0	0	0	0	0	1	0	NA	NA
CUT_GIM_1070	2	2	6	34	3	2	0	1	3	2	2	5	39	3	2	0	1	3	6.37	3	15	1	2.78	1.475	0.0978491836989539	0.128047655174241
CUT_GIM_1071	4	3	3	8	2	1	4	5	0	3	3	3	9	2	1	4	4	0	3.29	3	4	3	1.021	0.03	0.970409560838757	0.975921353525105
CUT_GIM_1072	44	21	26	257	92	146	51	63	44	36	22	23	296	105	143	52	51	43	85.68	27	181	49	6.167	2.624	9.53767412009201e-15	3.82357666440464e-14
CUT_GIM_1073	14	9	19	48	31	42	12	25	23	12	9	17	55	35	41	12	20	22	24.93	13	44	18	3.353	1.745	7.12393495897137e-05	0.000135963259726506
CUT_GIM_1074	1	0	0	4	3	22	0	1	1	1	0	0	5	3	22	0	1	1	3.58	0	10	1	9.261	3.211	0.00201022625293637	0.00331613551550175
CUT_GIM_1075	7	4	7	144	37	70	2	9	15	6	4	6	166	42	69	2	7	15	35.21	5	92	8	13.36	3.74	5.45024393971367e-10	1.54929580830684e-09
CUT_GIM_1076	8	5	10	11	5	5	4	6	8	7	5	9	13	6	5	4	5	8	6.73	7	8	6	1.095	0.131	0.830013897722031	0.860422461525739
CUT_GIM_1077	9	5	6	4	2	0	8	4	6	7	5	5	5	2	0	8	3	6	4.67	6	2	6	0.421	-1.247	0.117971728852779	0.152282958508072
CUT_GIM_1078	809	632	677	283	117	148	549	572	581	670	658	593	326	133	145	555	466	568	456.99	640	201	530	0.302	-1.725	1.43083928338548e-09	3.95383964664052e-09
CUT_GIM_1079	16	6	12	18	16	9	18	18	18	13	6	11	21	18	9	18	15	18	14.25	10	16	17	1.491	0.576	0.239155966049364	0.289314349819137
CUT_GIM_1080	0	3	1	1	1	0	2	0	2	0	3	1	1	1	0	2	0	2	1.14	1	1	1	0.773	-0.372	0.724743482041651	0.768125551527184
CUT_GIM_1081	7	8	8	6	5	12	4	2	5	6	8	7	7	6	12	4	2	5	6.23	7	8	4	1.094	0.129	0.83087800942957	0.860936373310335
CUT_GIM_1082	327	222	290	211	171	248	257	244	288	271	231	254	243	194	244	260	199	281	241.86	252	227	247	0.901	-0.15	0.436127113568266	0.495439044343225
CUT_GIM_1083	4	2	1	5	2	6	1	7	0	3	2	1	6	2	6	1	6	0	2.99	2	5	2	2.026	1.018	0.256584046423257	0.308257028159149
CUT_GIM_1084	69	23	24	6	4	18	20	19	21	57	24	21	7	5	18	20	15	21	20.83	34	10	19	0.314	-1.672	0.0020449658020141	0.00336916260571505
CUT_GIM_1085	3	8	4	54	44	96	9	26	21	2	8	4	62	50	94	9	21	21	30.19	5	69	17	13.1	3.712	7.71829134708383e-12	2.51592615570493e-11
CUT_GIM_1086	803	670	644	953	1313	760	421	721	407	665	697	564	1098	1493	747	425	587	398	741.57	642	1113	470	1.659	0.73	0.000307482490095383	0.000552381303498024
CUT_GIM_1087	4	3	2	7	3	8	3	1	1	3	3	2	8	3	8	3	1	1	3.59	3	6	2	1.968	0.977	0.205668264175579	0.252462115037376
CUT_GIM_1088	15	10	18	15	7	12	10	8	8	12	10	16	17	8	12	10	7	8	11.12	13	12	8	0.946	-0.08	0.869760974561009	0.89369794677921
CUT_GIM_1089	16	12	13	13	11	13	5	10	7	13	12	11	15	13	13	5	8	7	10.82	12	14	7	1.073	0.102	0.83259767446284	0.862412375799748
CUT_GIM_1090	2	0	2	5	2	7	0	0	1	2	0	2	6	2	7	0	0	1	2.14	1	5	0	2.997	1.583	0.102615437909622	0.133790472767136
CUT_GIM_1091	0	3	2	21	2	6	4	3	1	0	3	2	24	2	6	4	2	1	4.97	2	11	2	3.528	1.819	0.0418983074951794	0.058455542190624
CUT_GIM_1092	0	1	0	0	0	0	0	0	0	0	1	0	0	0	0	0	0	0	0.12	0	0	0	0.895	-0.16	0.862904570881275	NA
CUT_GIM_1093	34	14	21	21	16	24	18	16	28	28	15	18	24	18	24	18	13	27	20.63	20	22	19	1.081	0.112	0.782291592905525	0.81863135154231
CUT_GIM_1094	116	91	84	63	52	81	65	91	76	96	95	74	73	59	80	66	74	74	76.63	88	71	71	0.81	-0.304	0.259545505576359	0.311368829734398
CUT_GIM_1095	5	5	3	9	3	13	3	5	11	4	5	3	10	3	13	3	4	11	6.26	4	9	6	1.796	0.844	0.219147542287436	0.267490931603403
CUT_GIM_1096	0	0	0	0	0	0	0	0	0	0	0	0	0	0	0	0	0	0	0	0	0	0	1	0	NA	NA
CUT_GIM_1097	16	18	19	203	85	185	24	37	27	13	19	17	234	97	182	24	30	26	71.31	16	171	27	9.639	3.269	1.1799095054455e-16	5.29306045321924e-16
CUT_GIM_1098	4	1	4	11	6	10	7	6	10	3	1	4	13	7	10	7	5	10	6.55	3	10	7	3.199	1.678	0.0168317499586829	0.0249171307343765
CUT_GIM_1099	25	22	38	75	38	26	27	34	35	21	23	33	86	43	26	27	28	34	35.69	26	52	30	1.831	0.873	0.0463690851283114	0.064194897382946
CUT_GIM_1100	103	92	138	113	198	185	161	203	123	85	96	121	130	225	182	163	165	120	143.01	101	179	149	1.72	0.783	0.00431440179492318	0.00685867220452622
CUT_GIM_1101	5	7	6	60	42	34	10	9	9	4	7	5	69	48	33	10	7	9	21.47	5	50	9	7.932	2.988	4.37591492003032e-09	1.16804343890987e-08
CUT_GIM_1102	1	0	1	0	0	1	0	0	0	1	0	1	0	0	1	0	0	0	0.3	1	0	0	0.915	-0.128	0.890866884201201	NA
CUT_GIM_1103	6	1	9	119	67	121	10	21	4	5	1	8	137	76	119	10	17	4	41.91	5	111	10	19.125	4.257	6.10259621713109e-14	2.29899869095403e-13
CUT_GIM_1104	93	71	82	59	35	93	94	107	106	77	74	72	68	40	91	95	87	104	78.61	74	66	95	0.877	-0.19	0.514514565333795	0.571378619261687
CUT_GIM_1105	9	4	11	5	4	2	4	6	5	7	4	10	6	5	2	4	5	5	5.26	7	4	5	0.633	-0.659	0.334898128005863	0.391518559811576
CUT_GIM_1106	78	49	56	133	44	102	57	48	41	65	51	49	153	50	100	58	39	40	67.21	55	101	46	1.698	0.763	0.0149538178340736	0.0222611866508259
CUT_GIM_1107	2	0	0	0	1	2	0	0	1	2	0	0	0	1	2	0	0	1	0.64	1	1	0	1.234	0.303	0.7737015428634	0.811112965811581
CUT_GIM_1108	30	28	53	68	51	108	64	59	61	25	29	46	78	58	106	65	48	60	57.24	33	81	58	2.354	1.235	9.0877054626311e-05	0.000171787327784385
CUT_GIM_1109	6	5	4	12	1	9	8	4	11	5	5	4	14	1	9	8	3	11	6.62	5	8	7	1.354	0.438	0.514307301045462	0.571372896161481
CUT_GIM_1110	2	0	1	1	3	2	0	2	1	2	0	1	1	3	2	0	2	1	1.3	1	2	1	1.608	0.685	0.496402307308354	0.553896434947524
CUT_GIM_1111	6	2	4	47	18	52	26	22	20	5	2	4	54	20	51	26	18	20	22.22	4	42	21	10.066	3.331	1.65407266736073e-09	4.54597676170683e-09
CUT_GIM_1112	86	60	78	183	32	104	98	88	95	71	62	68	211	36	102	99	72	93	90.54	67	116	88	1.442	0.528	0.161802664891686	0.202900090344913
CUT_GIM_1113	7	10	12	11	10	21	5	3	6	6	10	11	13	11	21	5	2	6	9.42	9	15	4	1.555	0.637	0.233353488221856	0.282899063442264
CUT_GIM_1114	11	13	11	49	11	54	22	27	27	9	14	10	56	13	53	22	22	26	24.99	11	41	23	3.239	1.696	0.00104960474449333	0.00178565745292604
CUT_GIM_1115	32	17	24	15	7	27	25	19	22	27	18	21	17	8	27	25	15	22	19.91	22	17	21	0.788	-0.344	0.41789766785238	0.477095754838111
CUT_GIM_1116	4	1	0	2	2	3	0	0	1	3	1	0	2	2	3	0	0	1	1.43	1	2	0	1.497	0.582	0.559758605174895	0.615152209848774
CUT_GIM_1117	8	13	19	9	6	15	8	2	4	7	14	17	10	7	15	8	2	4	9.15	13	11	5	0.865	-0.209	0.716928390572174	0.761223439235547
CUT_GIM_1118	25	13	15	14	12	16	23	24	18	21	14	13	16	14	16	23	20	18	17.03	16	15	20	0.977	-0.034	0.936711015323852	0.948808609263633
CUT_GIM_1119	94	56	101	2691	899	2145	292	350	316	78	58	88	3101	1022	2108	295	285	309	816.04	75	2077	296	24.878	4.637	3.35416555698576e-53	1.09488208656245e-51
CUT_GIM_1120	25	15	15	135	48	72	36	33	27	21	16	13	156	55	71	36	27	26	46.66	17	94	30	5.153	2.365	1.7351294703702e-10	5.10363025188678e-10
CUT_GIM_1121	5	3	4	24	14	15	6	14	12	4	3	4	28	16	15	6	11	12	10.92	4	20	10	4.627	2.21	0.000435533462673221	0.000769991534765395
CUT_GIM_1122	2	3	3	5	7	3	12	9	6	2	3	3	6	8	3	12	7	6	5.49	3	6	8	1.874	0.906	0.212333185564921	0.260015257938979
CUT_GIM_1123	21	18	22	45	32	43	11	22	19	17	19	19	52	36	42	11	18	19	25.94	18	43	16	2.264	1.179	0.0025881000632764	0.00421644184294549
CUT_GIM_1124	2	5	4	0	0	3	2	0	1	2	5	4	0	0	3	2	0	1	1.81	4	1	1	0.373	-1.422	0.172355774419144	0.214934327164883
CUT_GIM_1125	17	10	7	4	6	10	3	3	6	14	10	6	5	7	10	3	2	6	7.02	10	7	4	0.725	-0.465	0.450431825593497	0.509473359850173
CUT_GIM_1126	150	113	132	812	619	547	167	192	185	124	118	116	936	704	538	169	156	181	337.81	119	726	169	5.891	2.558	6.83527790450867e-27	5.57411427718691e-26
CUT_GIM_1127	8	10	10	43	22	44	7	4	9	7	10	9	50	25	43	7	3	9	18.08	9	39	6	4.123	2.044	3.6739171059331e-05	7.21933669075739e-05
CUT_GIM_1128	29	14	18	10	5	20	15	9	17	24	15	16	12	6	20	15	7	17	14.48	18	13	13	0.677	-0.563	0.243892454572037	0.294619747295419
CUT_GIM_1129	7	1	1	0	2	3	0	0	2	6	1	1	0	2	3	0	0	2	1.65	3	2	1	0.73	-0.454	0.65228972373226	0.702873002446767
CUT_GIM_1130	103	98	145	756	317	750	207	182	196	85	102	127	871	361	737	209	148	192	314.63	105	656	183	5.8	2.536	1.64309209053274e-18	8.15336482801087e-18
CUT_GIM_1131	1155	936	1268	9519	5545	10701	2639	3123	2679	957	974	1110	10968	6306	10516	2666	2542	2618	4295.28	1014	9263	2609	8.798	3.137	1.14571780646268e-46	2.68313793313085e-45
CUT_GIM_1132	7	2	10	2	2	0	6	4	3	6	2	9	2	2	0	6	3	3	3.72	6	1	4	0.362	-1.466	0.0966777107645135	0.126684876429032
CUT_GIM_1133	17	6	12	24	23	27	13	17	21	14	6	11	28	26	27	13	14	21	17.63	10	27	16	2.474	1.307	0.0048345603664481	0.00763778186323002
CUT_GIM_1134	208	167	216	877	153	278	365	383	396	172	174	189	1011	174	273	369	312	387	340.04	178	486	356	2.097	1.068	0.00883545452980427	0.013505705903897
CUT_GIM_1135	43	28	24	1162	281	447	37	39	54	36	29	21	1339	320	439	37	32	53	256.16	29	699	41	19.509	4.286	1.1762987299212e-26	9.47362298956519e-26
CUT_GIM_1136	383	254	275	80	138	95	183	189	187	317	264	241	92	157	93	185	154	183	187.35	274	114	174	0.421	-1.248	4.97791553783323e-06	1.05231405526627e-05
CUT_GIM_1137	2	2	3	2	3	6	2	2	4	2	2	3	2	3	6	2	2	4	2.84	2	4	3	1.541	0.624	0.438882149756252	0.497939495344812
CUT_GIM_1138	20	3	8	105	94	115	18	17	23	17	3	7	121	107	113	18	14	22	46.9	9	114	18	12.179	3.606	9.83046933508401e-17	4.44062097602597e-16
CUT_GIM_1139	68	54	87	202	135	228	77	84	99	56	56	76	233	154	224	78	68	97	115.77	63	204	81	3.179	1.669	1.6103826353943e-11	5.12917183898006e-11
CUT_GIM_1140	16	7	15	330	92	187	19	22	21	13	7	13	380	105	184	19	18	21	84.44	11	223	19	16.867	4.076	1.18169052132277e-23	8.01930048326241e-23
CUT_GIM_1141	2	0	2	2	0	2	0	2	2	2	0	2	2	0	2	0	2	2	1.25	1	1	1	1.12	0.163	0.873687913671207	0.897180752123175
CUT_GIM_1142	308	197	151	354	311	367	220	220	223	255	205	132	408	354	361	222	179	218	259.31	197	374	206	1.898	0.925	0.000148007341695218	0.000274150229045857
CUT_GIM_1143	5	5	14	27	15	20	6	11	2	4	5	12	31	17	20	6	9	2	11.82	7	23	6	2.756	1.463	0.017388657072573	0.0256992344188804
CUT_GIM_1144	35	10	27	31	29	22	16	19	26	29	10	24	36	33	22	16	15	25	23.38	21	30	19	1.429	0.515	0.233986066186068	0.28355917965886
CUT_GIM_1145	0	1	4	6	4	1	0	0	1	0	1	4	7	5	1	0	0	1	2	2	4	0	2.521	1.334	0.19062899176507	0.235609772370873
CUT_GIM_1146	0	0	0	0	0	0	0	0	0	0	0	0	0	0	0	0	0	0	0	0	0	0	1	0	NA	NA
CUT_GIM_1147	76	57	40	8	10	13	29	40	28	63	59	35	9	11	13	29	33	27	31.1	52	11	30	0.23	-2.119	4.77727032757925e-07	1.09744802532123e-06
CUT_GIM_1148	48	17	31	218	152	258	56	62	55	40	18	27	251	173	254	57	50	54	102.55	28	226	54	7.815	2.966	2.44334556472612e-24	1.73679661006018e-23
CUT_GIM_1149	37	25	51	23	13	30	19	18	27	31	26	45	27	15	29	19	15	26	25.81	34	24	20	0.714	-0.487	0.178489915614483	0.221802759875675
CUT_GIM_1150	24	23	17	7	6	6	13	18	17	20	24	15	8	7	6	13	15	17	13.76	20	7	15	0.385	-1.376	0.00796927493314031	0.0122602615677564
CUT_GIM_1151	1	0	2	2	0	0	0	1	1	1	0	2	2	0	0	0	1	1	0.74	1	1	1	0.932	-0.102	0.923642877576628	0.93907174763881
CUT_GIM_1152	3	1	0	1	1	1	2	1	1	2	1	0	1	1	1	2	1	1	1.18	1	1	1	1.097	0.133	0.894355395543477	0.914786621647359
CUT_GIM_1153	38	29	37	347	208	483	71	62	81	31	30	32	400	237	475	72	50	79	156.27	31	371	67	11.117	3.475	4.58572929657851e-37	6.71539255135544e-36
CUT_GIM_1154	41	21	33	17	9	17	18	21	19	34	22	29	20	10	17	18	17	19	20.56	28	16	18	0.571	-0.809	0.0473506021906775	0.0654761729026455
CUT_GIM_1155	6	4	10	7	4	11	5	4	7	5	4	9	8	5	11	5	3	7	6.27	6	8	5	1.251	0.323	0.5907198239307	0.644792813604909
CUT_GIM_1156	204	102	117	178	201	202	106	92	111	169	106	102	205	229	199	107	75	108	144.46	126	211	97	1.681	0.749	0.00429362260749116	0.00682842593782548
CUT_GIM_1157	16	5	7	49	25	38	14	15	21	13	5	6	56	28	37	14	12	21	21.52	8	40	16	4.646	2.216	3.267944520014e-06	7.01749350622631e-06
CUT_GIM_1158	16	9	15	31	30	53	12	8	18	13	9	13	36	34	52	12	7	18	21.54	12	41	12	3.232	1.692	8.21680035656095e-05	0.000155853804523245
CUT_GIM_1159	577	428	569	175	276	245	431	468	456	478	445	498	202	314	241	435	381	446	382.18	474	252	421	0.537	-0.898	6.63946099797559e-05	0.00012692416362235
CUT_GIM_1160	549	383	441	570	244	444	237	428	343	455	399	386	657	277	436	239	348	335	392.54	413	457	307	1.075	0.104	0.723308050589655	0.767021586133458
CUT_GIM_1161	15	5	6	165	98	118	17	23	12	12	5	5	190	111	116	17	19	12	54.23	7	139	16	16.695	4.061	4.80906903462334e-23	3.1321200671067e-22
CUT_GIM_1162	2	0	0	2	0	0	1	0	0	2	0	0	2	0	0	1	0	0	0.55	1	1	0	1.065	0.091	0.928917427765854	0.943285458887015
CUT_GIM_1163	5	3	2	1	1	1	2	1	0	4	3	2	1	1	1	2	1	0	1.68	3	1	1	0.526	-0.927	0.332564790166721	0.38906318329045
CUT_GIM_1164	88	47	59	27	21	46	45	63	46	73	49	52	31	24	45	45	51	45	46.15	58	33	47	0.595	-0.748	0.0286885679378726	0.0410700238787184
CUT_GIM_1165	3	0	0	102	28	59	5	2	0	2	0	0	118	32	58	5	2	0	24.06	1	69	2	45.942	5.522	4.68884687753979e-11	1.44460491987688e-10
CUT_GIM_1166	101	105	128	126	63	136	172	180	132	84	109	112	145	72	134	174	146	129	122.75	102	117	150	1.115	0.158	0.594675183726282	0.648500433023248
CUT_GIM_1167	11	5	10	17	9	12	2	7	3	9	5	9	20	10	12	2	6	3	8.37	8	14	4	1.638	0.712	0.218817662438186	0.267116181265293
CUT_GIM_1168	6884	6519	6632	5098	3176	3290	7138	9635	6882	5701	6785	5804	5874	3612	3233	7212	7841	6726	5865.42	6097	4240	7260	0.689	-0.538	0.0200272100545941	0.0293243925194821
CUT_GIM_1169	5	12	19	16	16	13	8	8	9	4	12	17	18	18	13	8	7	9	11.78	11	16	8	1.484	0.569	0.285576587406096	0.339392657421706
CUT_GIM_1170	37	17	32	0	3	5	11	8	6	31	18	28	0	3	5	11	7	6	12.02	26	3	8	0.14	-2.835	3.96443635031112e-05	7.76931128454397e-05
CUT_GIM_1171	74	38	65	9	6	5	34	33	30	61	40	57	10	7	5	34	27	29	30.04	53	7	30	0.149	-2.742	1.31370018615193e-09	3.6439355270286e-09
CUT_GIM_1172	43	25	26	94	15	58	28	52	43	36	26	23	108	17	57	28	42	42	42.15	28	61	37	1.848	0.886	0.0614714943272073	0.0834133630640669
CUT_GIM_1173	5	2	6	3	0	1	0	3	1	4	2	5	3	0	1	0	2	1	2.15	4	1	1	0.507	-0.981	0.308800234349567	0.364045974702275
CUT_GIM_1174	0	1	1	0	0	0	0	0	0	0	1	1	0	0	0	0	0	0	0.21	1	0	0	0.792	-0.336	0.717804129058344	NA
CUT_GIM_1175	1	2	1	3	2	7	2	2	4	1	2	1	3	2	7	2	2	4	2.66	1	4	3	2.372	1.246	0.161888157771003	0.202985516278106
CUT_GIM_1176	6	6	1	6	2	13	7	6	8	5	6	1	7	2	13	7	5	8	5.98	4	7	7	1.532	0.615	0.394984502957336	0.454265220112137
CUT_GIM_1177	15	14	22	427	112	317	55	52	60	12	15	19	492	127	312	56	42	59	125.97	15	310	52	16.926	4.081	9.83667048095267e-25	7.16654184790604e-24
CUT_GIM_1178	0	1	2	1	3	3	2	2	2	0	1	2	1	3	3	2	2	2	1.77	1	2	2	2.019	1.014	0.298862299978147	0.353529796883372
CUT_GIM_1179	21	12	7	18	24	39	11	20	15	17	12	6	21	27	38	11	16	15	18.27	12	29	14	2.238	1.162	0.0184656853484691	0.0271981344822549
CUT_GIM_1180	2	1	2	16	9	4	3	3	4	2	1	2	18	10	4	3	2	4	5.16	2	11	3	4.931	2.302	0.00582712302010188	0.00911345819230601
CUT_GIM_1181	2	1	2	6	0	4	9	3	2	2	1	2	7	0	4	9	2	2	3.2	2	4	4	1.659	0.73	0.404593600162096	0.463946699194804
CUT_GIM_1182	47	28	53	80	41	71	27	38	39	39	29	46	92	47	70	27	31	38	46.6	38	70	32	1.759	0.814	0.0125401467453855	0.018836009622953
CUT_GIM_1183	466	425	519	2808	1498	2297	925	1138	959	386	442	454	3236	1704	2257	935	926	937	1253	427	2399	933	5.385	2.429	5.10931897293824e-23	3.32447113127819e-22
CUT_GIM_1184	27	22	12	38	27	48	17	29	10	22	23	11	44	31	47	17	24	10	25.33	19	41	17	2.197	1.136	0.00983833222039874	0.0149682007977581
CUT_GIM_1185	21	17	28	184	83	196	23	32	35	17	18	25	212	94	193	23	26	34	71.35	20	166	28	7.809	2.965	4.2350556283906e-17	1.94845905800679e-16
CUT_GIM_1186	2	4	1	9	3	4	5	3	6	2	4	1	10	3	4	5	2	6	4.2	2	6	4	2.089	1.063	0.183966474155535	0.228098908963563
CUT_GIM_1187	1	1	1	11	6	12	0	0	0	1	1	1	13	7	12	0	0	0	3.78	1	11	0	6.558	2.713	0.00420511790806767	0.00669040270574252
CUT_GIM_1188	1214	1019	1022	220	243	459	887	1129	926	1005	1061	894	253	276	451	896	919	905	740.15	987	327	907	0.33	-1.599	7.41304409839167e-11	2.2524397642695e-10
CUT_GIM_1189	27	15	27	15	8	12	12	13	12	22	16	24	17	9	12	12	11	12	14.91	21	13	12	0.643	-0.638	0.155340238364458	0.195593796522687
CUT_GIM_1190	2	0	3	4	1	5	1	4	1	2	0	3	5	1	5	1	3	1	2.24	2	4	2	1.882	0.912	0.329979794995001	0.386232360207491
CUT_GIM_1191	4	1	3	10	8	6	1	2	4	3	1	3	12	9	6	1	2	4	4.45	2	9	2	3.075	1.621	0.0394670416855962	0.0552945509097084
CUT_GIM_1192	10586	8157	9625	43063	17516	18709	8777	9919	9404	8767	8490	8424	49620	19921	18386	8867	8072	9191	15526.43	8560	29309	8710	3.092	1.628	4.95522943390995e-08	1.22970505764858e-07
CUT_GIM_1193	9	3	2	9	4	4	2	6	5	7	3	2	10	5	4	2	5	5	4.77	4	6	4	1.416	0.501	0.485838118385534	0.543561919717889
CUT_GIM_1194	122	97	125	35	49	39	86	127	92	101	101	109	40	56	38	87	103	90	80.66	104	45	93	0.435	-1.202	1.03238078093216e-05	2.12551124136244e-05
CUT_GIM_1195	1078	831	1101	1499	1147	1797	932	936	1016	893	865	964	1727	1304	1766	942	762	993	1135.03	907	1599	899	1.735	0.795	2.41403102802392e-06	5.23869388922702e-06
CUT_GIM_1196	71	45	59	28	15	21	56	43	39	59	47	52	32	17	21	57	35	38	39.66	53	23	43	0.449	-1.155	0.000624920957210557	0.00108867416606478
CUT_GIM_1197	15	14	22	427	111	317	54	52	60	12	15	19	492	126	312	55	42	59	125.73	15	310	52	16.887	4.078	1.81508997160209e-24	1.29811146928653e-23
CUT_GIM_1198	27	18	25	48	32	43	32	27	28	22	19	22	55	36	42	32	22	27	30.96	21	44	27	2.043	1.031	0.00311129370781185	0.00502259680473674
CUT_GIM_1199	6	2	2	100	32	51	5	5	5	5	2	2	115	36	50	5	4	5	24.95	3	67	5	18.105	4.178	7.42436041848991e-13	2.59065619141454e-12
CUT_GIM_1200	22	17	24	55	42	98	92	94	95	18	18	21	63	48	96	93	77	93	58.52	19	69	88	3.478	1.798	7.79693948909476e-08	1.90298736151966e-07
CUT_GIM_1201	5	4	2	10	10	11	6	10	5	4	4	2	12	11	11	6	8	5	6.98	3	11	6	2.999	1.584	0.0164949758251666	0.0244464537086743
CUT_GIM_1202	28	18	29	129	43	73	27	35	32	23	19	25	149	49	72	27	28	31	47.07	22	90	29	3.611	1.852	2.44302533703553e-06	5.2996462017073e-06
CUT_GIM_1203	2	1	0	0	0	2	1	0	1	2	1	0	0	0	2	1	0	1	0.74	1	1	1	0.76	-0.395	0.710808589147939	0.755991249206892
CUT_GIM_1204	2	4	5	2	2	4	3	4	1	2	4	4	2	2	4	3	3	1	2.89	3	3	2	0.898	-0.155	0.846277952140019	0.873871533861294
CUT_GIM_1205	833	724	850	229	250	421	635	812	680	690	754	744	264	284	414	642	661	665	568.47	729	321	656	0.44	-1.186	8.71059193654861e-09	2.28233133117729e-08
CUT_GIM_1206	22	14	25	2	3	5	16	9	15	18	15	22	2	3	5	16	7	15	11.49	18	3	13	0.224	-2.158	0.000515511050236179	0.000904815580213275
CUT_GIM_1207	917	685	822	2909	1113	1287	1119	1331	1080	759	713	719	3352	1266	1265	1131	1083	1056	1260.4	730	1961	1090	2.411	1.27	1.94112585427768e-05	3.90094526794307e-05
CUT_GIM_1208	239	230	251	33	32	52	191	273	222	198	239	220	38	36	51	193	222	217	157.18	219	42	211	0.195	-2.357	4.46817717620661e-21	2.58235007325175e-20
CUT_GIM_1209	8314	7687	9107	4297	6062	4335	5610	6413	5923	6885	8001	7970	4951	6894	4260	5668	5219	5789	6181.98	7619	5368	5559	0.705	-0.505	0.0166359629699881	0.0246460272904768
CUT_GIM_1210	5	2	9	12	12	33	11	3	10	4	2	8	14	14	32	11	2	10	10.81	5	20	8	3.907	1.966	0.00138725574197606	0.00233225012238991
CUT_GIM_1211	11	3	6	0	3	1	4	2	6	9	3	5	0	3	1	4	2	6	3.71	6	1	4	0.361	-1.47	0.0990141875797406	0.129441749195307
CUT_GIM_1212	47	29	24	30	25	35	35	25	23	39	30	21	35	28	34	35	20	22	29.52	30	32	26	1.098	0.135	0.701518541518689	0.747442165954358
CUT_GIM_1213	0	1	1	1	1	0	0	0	0	0	1	1	1	1	0	0	0	0	0.47	1	1	0	1.056	0.079	0.939266243273111	0.950984692331448
CUT_GIM_1214	0	0	2	2	3	1	1	1	0	0	0	2	2	3	1	1	1	0	1.14	1	2	1	2.11	1.077	0.309945775174772	0.365261827989536
CUT_GIM_1215	9	8	6	161	16	28	9	5	4	7	8	5	186	18	28	9	4	4	29.93	7	77	6	6.347	2.666	5.34086760631389e-06	1.1255794201512e-05
CUT_GIM_1216	9	7	7	24	12	22	5	1	1	7	7	6	28	14	22	5	1	1	10.07	7	21	2	2.66	1.412	0.0141400953752215	0.0211143821306975
CUT_GIM_1217	1	1	1	2	0	4	1	0	1	1	1	1	2	0	4	1	0	1	1.22	1	2	1	1.383	0.467	0.642195031456361	0.693530277940952
CUT_GIM_1218	7	7	8	11	4	6	8	11	9	6	7	7	13	5	6	8	9	9	7.67	7	8	9	1.095	0.131	0.823447496276901	0.854980670057029
CUT_GIM_1219	18	9	17	354	89	225	23	28	24	15	9	15	408	101	221	23	23	23	93.21	13	243	23	15.712	3.974	1.85187709443474e-22	1.16474896262456e-21
CUT_GIM_1220	17	6	16	62	55	72	16	15	12	14	6	14	71	63	71	16	12	12	31.02	11	68	13	5.699	2.511	3.95340077823219e-10	1.13233925231425e-09
CUT_GIM_1221	59	38	47	34	54	35	61	60	22	49	40	41	39	61	34	62	49	22	44.05	43	45	44	1.015	0.022	0.950325703965042	0.959521874592663
CUT_GIM_1222	32	16	34	13	10	11	44	40	41	27	17	30	15	11	11	44	33	40	25.24	25	12	39	0.535	-0.901	0.028858154487011	0.0412976234796976
CUT_GIM_1223	6	7	10	7	2	15	10	9	7	5	7	9	8	2	15	10	7	7	7.82	7	8	8	1.095	0.132	0.829473912111003	0.859956198156822
CUT_GIM_1224	63	42	61	290	234	431	106	123	96	52	44	53	334	266	424	107	100	94	163.79	50	341	100	6.653	2.734	3.37289899333929e-27	2.80738587152158e-26
CUT_GIM_1225	69	24	19	54	29	27	13	25	22	57	25	17	62	33	27	13	20	22	30.61	33	41	18	1.239	0.309	0.4656857812547	0.524479957569625
CUT_GIM_1226	47	44	63	262	145	302	74	72	63	39	46	55	302	165	297	75	59	62	122.04	47	255	65	5.207	2.381	2.20167944536211e-16	9.75315617835542e-16
CUT_GIM_1227	0	1	0	1	1	1	0	0	0	0	1	0	1	1	1	0	0	0	0.48	0	1	0	1.551	0.633	0.545113327822482	0.601104698469516
CUT_GIM_1228	7	3	10	1	2	1	3	7	8	6	3	9	1	2	1	3	6	8	4.29	6	1	6	0.333	-1.586	0.0615815457089275	0.0835529946771772
CUT_GIM_1229	54	35	31	39	44	47	24	26	25	45	36	27	45	50	46	24	21	24	35.48	36	47	23	1.294	0.371	0.256288868197275	0.307936635179247
CUT_GIM_1230	837	696	847	415	512	446	555	651	554	693	724	741	478	582	438	561	530	541	587.74	719	499	544	0.697	-0.521	0.00495528986755211	0.00781688949678913
CUT_GIM_1231	10	6	5	56	13	31	20	24	11	8	6	4	65	15	30	20	20	11	19.91	6	37	17	4.968	2.313	2.27167473956197e-05	4.5425720408147e-05
CUT_GIM_1232	12	13	18	290	77	227	45	42	54	10	14	16	334	88	223	45	34	53	90.72	13	215	44	13.82	3.789	1.27242247036013e-19	6.75887681301293e-19
CUT_GIM_1233	326	229	190	36	59	78	150	211	165	270	238	166	41	67	77	152	172	161	149.37	225	62	162	0.281	-1.831	1.90651278087576e-09	5.21768345604545e-09
CUT_GIM_1234	51	40	56	145	64	173	46	41	31	42	42	49	167	73	170	46	33	30	72.54	44	137	36	2.877	1.525	4.57161217593685e-06	9.70636989244151e-06
CUT_GIM_1235	507	340	284	115	66	59	221	294	211	420	354	249	133	75	58	223	239	206	217.4	341	89	223	0.259	-1.947	1.68141891810857e-13	6.13841345736229e-13
CUT_GIM_1236	84	66	108	659	566	730	194	228	213	70	69	95	759	644	717	196	186	208	326.99	78	707	197	8.984	3.167	2.29396506383239e-50	6.29278773144256e-49
CUT_GIM_1237	51	34	32	101	123	186	40	48	48	42	35	28	116	140	183	40	39	47	74.56	35	146	42	4.001	2.001	1.28730800294208e-10	3.83566581396765e-10
CUT_GIM_1238	2	1	2	8	13	35	6	10	4	2	1	2	9	15	34	6	8	4	9	2	19	6	8.665	3.115	7.69852821172163e-05	0.000146355947099689
CUT_GIM_1239	5	8	5	16	10	11	1	2	4	4	8	4	18	11	11	1	2	4	7.11	5	13	2	2.179	1.123	0.0809783437496819	0.107682399301182
CUT_GIM_1240	1	2	0	7	1	3	5	1	0	1	2	0	8	1	3	5	1	0	2.33	1	4	2	2.652	1.407	0.155944256892407	0.196290886045311
CUT_GIM_1241	87	102	104	413	315	491	102	135	108	72	106	91	476	358	483	103	110	106	211.6	90	439	106	4.826	2.271	7.50823172560494e-20	4.06585708736883e-19
CUT_GIM_1242	3	8	4	4	1	5	3	3	3	2	8	4	5	1	5	3	2	3	3.71	5	4	3	0.82	-0.287	0.706083397647148	0.751552107195971
CUT_GIM_1243	5	6	8	9	4	5	18	9	11	4	6	7	10	5	5	18	7	11	8.16	6	7	12	1.062	0.087	0.885551591162405	0.907442103859167
CUT_GIM_1244	3	0	1	0	3	3	3	2	1	2	0	1	0	3	3	3	2	1	1.71	1	2	2	1.652	0.724	0.467041873091354	0.525804559628667
CUT_GIM_1245	5	1	6	7	3	6	10	2	5	4	1	5	8	3	6	10	2	5	4.94	3	6	6	1.564	0.645	0.362929464156736	0.42046135799897
CUT_GIM_1246	7	8	8	47	26	26	5	12	10	6	8	7	54	30	26	5	10	10	17.22	7	37	8	4.661	2.221	3.24322492194349e-05	6.40749390326824e-05
CUT_GIM_1247	5	2	2	0	1	0	0	1	2	4	2	2	0	1	0	0	1	2	1.32	3	0	1	0.321	-1.639	0.128317349823528	0.164655380480702
CUT_GIM_1248	5	4	8	57	22	36	12	15	9	4	4	7	66	25	35	12	12	9	19.39	5	42	11	6.969	2.801	2.43011961848673e-07	5.71971356729828e-07
CUT_GIM_1249	1	2	1	1	0	1	1	1	3	1	2	1	1	0	1	1	1	3	1.19	1	1	2	0.692	-0.53	0.604783388711076	0.658299057421538
CUT_GIM_1250	29	18	22	14	15	15	15	16	21	24	19	19	16	17	15	15	13	21	17.63	21	16	16	0.794	-0.333	0.427612340220034	0.487139579626761
CUT_GIM_1251	31431	25613	26360	10789	15301	13768	21445	26705	22337	26030	26659	23070	12432	17401	13531	21666	21733	21831	20483.59	25253	14455	21743	0.574	-0.801	6.60785365124971e-06	1.38311620577654e-05
CUT_GIM_1252	6	8	9	23	8	19	8	5	11	5	8	8	27	9	19	8	4	11	10.93	7	18	8	2.217	1.149	0.0421880239097087	0.0588316524354243
CUT_GIM_1253	1	0	0	1	1	0	0	0	1	1	0	0	1	1	0	0	0	1	0.46	0	1	0	1.318	0.399	0.699996281002783	0.746432752970027
CUT_GIM_1254	0	3	2	1	2	2	0	2	2	0	3	2	1	2	2	0	2	2	1.54	2	2	1	1.257	0.33	0.73240188411027	0.774977220002953
CUT_GIM_1255	10	5	5	4	1	1	0	5	3	8	5	4	5	1	1	0	4	3	3.51	6	2	2	0.466	-1.1	0.203232763438968	0.249761076196001
CUT_GIM_1256	50	65	57	62	46	68	74	78	75	41	68	50	71	52	67	75	63	73	62.34	53	63	70	1.192	0.253	0.402865944154366	0.462101631663518
CUT_GIM_1257	66	34	46	228	90	188	39	35	32	55	35	40	263	102	185	39	28	31	86.59	43	183	33	3.983	1.994	6.23801162260585e-12	2.04251621803788e-11
CUT_GIM_1258	17	17	43	71	36	79	26	37	45	14	18	38	82	41	78	26	30	44	41.13	23	67	33	2.889	1.531	7.78676355348678e-05	0.000147961168920401
CUT_GIM_1259	71	48	70	106	31	67	67	102	62	59	50	61	122	35	66	68	83	61	67.17	57	74	71	1.217	0.283	0.436849979804213	0.4959709379182
CUT_GIM_1260	20	19	20	59	28	70	35	29	40	17	20	18	68	32	69	35	24	39	35.61	18	56	33	2.905	1.539	5.70388586237788e-05	0.000109703110908077
CUT_GIM_1261	6	4	5	18	14	37	11	11	23	5	4	4	21	16	36	11	9	22	14.34	4	24	14	4.676	2.225	6.16140266093889e-05	0.000118164507834704
CUT_GIM_1262	0	0	0	0	0	0	0	0	0	0	0	0	0	0	0	0	0	0	0	0	0	0	1	0	NA	NA
CUT_GIM_1263	1	1	1	14	12	16	5	7	3	1	1	1	16	14	16	5	6	3	6.88	1	15	5	10.468	3.388	9.03895191919926e-05	0.000170921022860457
CUT_GIM_1264	10	4	7	40	16	25	9	7	7	8	4	6	46	18	25	9	6	7	14.34	6	30	7	4.272	2.095	5.36781558954843e-05	0.000103614623355572
CUT_GIM_1265	14	3	11	63	28	44	10	12	24	12	3	10	73	32	43	10	10	23	23.93	8	49	14	5.683	2.507	6.0832398333808e-07	1.38170535846235e-06
CUT_GIM_1266	37	17	24	107	80	86	22	22	20	31	18	21	123	91	85	22	18	20	47.53	23	100	20	4.194	2.068	9.94385866719561e-11	2.98647988652911e-10
CUT_GIM_1267	10	16	19	12	15	14	7	13	9	8	17	17	14	17	14	7	11	9	12.52	14	15	9	1.087	0.121	0.794226469582986	0.829579060023845
CUT_GIM_1268	15	17	17	9	6	8	9	23	13	12	18	15	10	7	8	9	19	13	12.29	15	8	14	0.604	-0.728	0.153773525894594	0.193850854757737
CUT_GIM_1269	3595	2981	3598	2209	3837	3471	2535	3213	2777	2977	3103	3149	2545	4364	3411	2561	2615	2714	3048.79	3076	3440	2630	1.097	0.134	0.506467963738243	0.563460074661568
CUT_GIM_1270	14	4	5	14	12	5	4	5	4	12	4	4	16	14	5	4	4	4	7.43	7	12	4	1.574	0.654	0.275271193630122	0.328414412328903
CUT_GIM_1271	23	22	27	560	182	450	65	74	73	19	23	24	645	207	442	66	60	71	173.03	22	431	66	17.257	4.109	1.50253061122291e-29	1.42868777239633e-28
CUT_GIM_1272	419	251	280	128	269	219	165	207	169	347	261	245	147	306	215	167	168	165	224.7	284	223	167	0.78	-0.359	0.199298032950594	0.245235001901721
CUT_GIM_1273	7	3	3	6	4	7	6	7	11	6	3	3	7	5	7	6	6	11	5.82	4	6	8	1.454	0.54	0.415448083738647	0.474809418735436
CUT_GIM_1274	88	71	77	63	23	35	73	61	55	73	74	67	73	26	34	74	50	54	58.27	71	44	59	0.599	-0.74	0.0250044191368962	0.0361277994601594
CUT_GIM_1275	15	4	12	10	6	2	3	3	8	12	4	11	12	7	2	3	2	8	6.74	9	7	4	0.816	-0.293	0.659022584454725	0.709212443313188
CUT_GIM_1276	66	46	46	62	28	50	41	69	67	55	48	40	71	32	49	41	56	65	50.92	48	51	54	1.044	0.063	0.856620984170751	0.882290923763388
CUT_GIM_1277	14	6	8	180	81	197	24	28	26	12	6	7	207	92	194	24	23	25	65.6	8	164	24	17.708	4.146	1.11410232494213e-24	8.08156410259076e-24
CUT_GIM_1278	3	3	6	5	3	4	2	4	5	2	3	5	6	3	4	2	3	5	3.79	3	4	3	1.19	0.251	0.728989227204661	0.771925345153467
CUT_GIM_1279	79524	64349	77985	32499	58243	47379	58102	76117	62260	65858	66976	68252	37447	66238	46562	58700	61946	60849	59203.32	67029	50082	60498	0.738	-0.437	0.0340867299737163	0.0482890398492508
CUT_GIM_1280	3	4	8	27	18	32	11	8	7	2	4	7	31	20	31	11	7	7	13.46	4	27	8	5.42	2.438	2.0851351697807e-05	4.18387527370488e-05
CUT_GIM_1281	298	185	259	166	99	153	163	170	202	247	193	227	191	113	150	165	138	197	180.08	222	151	167	0.682	-0.552	0.0128736160139901	0.0193219980400062
CUT_GIM_1282	119	77	119	352	145	431	149	144	134	99	80	104	406	165	424	151	117	131	186.18	94	332	133	3.277	1.713	1.5349175436442e-09	4.2314334548304e-09
CUT_GIM_1283	13	14	12	31	11	26	22	26	19	11	15	11	36	13	26	22	21	19	19.06	12	25	21	1.896	0.923	0.0480778761335246	0.0664312446650411
CUT_GIM_1284	27	22	29	72	37	65	44	63	72	22	23	25	83	42	64	44	51	70	47.29	23	63	55	2.557	1.355	0.000145006978644379	0.000268891074649035
CUT_GIM_1285	5	3	2	4	2	6	3	5	8	4	3	2	5	2	6	3	4	8	4.08	3	4	5	1.265	0.339	0.647989159009118	0.699012398428926
CUT_GIM_1286	35	21	25	77	42	78	22	21	15	29	22	22	89	48	77	22	17	15	37.76	24	71	18	2.817	1.494	1.50854985104379e-05	3.06749844428358e-05
CUT_GIM_1287	12	8	6	9	11	7	3	2	5	10	8	5	10	13	7	3	2	5	6.98	8	10	3	1.221	0.288	0.62634753802645	0.678988620535908
CUT_GIM_1288	3	1	1	1	2	1	3	0	1	2	1	1	1	2	1	3	0	1	1.42	1	1	1	1.1	0.138	0.887022399621487	0.908558485579516
CUT_GIM_1289	2	0	1	0	2	0	0	2	0	2	0	1	0	2	0	0	2	0	0.71	1	1	1	0.681	-0.554	0.60289407083487	0.656364832474035
CUT_GIM_1290	6	3	8	19	8	21	11	6	10	5	3	7	22	9	21	11	5	10	10.28	5	17	9	3.065	1.616	0.00479804601727188	0.00758317091666746
CUT_GIM_1291	2	3	5	13	5	7	2	9	2	2	3	4	15	6	7	2	7	2	5.33	3	9	4	2.49	1.316	0.0839890437620904	0.111192473706105
CUT_GIM_1292	9	9	6	2	3	2	4	8	11	7	9	5	2	3	2	4	7	11	5.67	7	2	7	0.41	-1.285	0.0822735891084664	0.109255586627448
CUT_GIM_1293	0	0	0	0	1	0	0	2	0	0	0	0	0	1	0	0	2	0	0.31	0	0	1	1.188	0.249	0.788538149091645	NA
CUT_GIM_1294	1	5	6	3	3	5	2	5	5	1	5	5	3	3	5	2	4	5	3.78	4	4	4	1.131	0.178	0.809697744136332	0.843402071305568
CUT_GIM_1295	1	4	1	16	8	18	0	3	6	1	4	1	18	9	18	0	2	6	6.6	2	15	3	6.036	2.594	0.00235443267868289	0.00384980635257828
CUT_GIM_1296	21	14	15	13	8	15	10	14	13	17	15	13	15	9	15	10	11	13	13.12	15	13	11	0.873	-0.196	0.670905683120654	0.720011370460829
CUT_GIM_1297	0	0	0	0	0	0	0	0	0	0	0	0	0	0	0	0	0	0	0	0	0	0	1	0	NA	NA
CUT_GIM_1298	17	7	8	1	2	1	5	9	11	14	7	7	1	2	1	5	7	11	6.21	9	1	8	0.212	-2.24	0.00714261031717506	0.0110481196778965
CUT_GIM_1299	42	42	30	254	95	133	25	41	33	35	44	26	293	108	131	25	33	32	80.78	35	177	30	4.653	2.218	1.05315962877267e-08	2.7379807390072e-08
CUT_GIM_1300	366	230	197	121	195	120	148	206	140	303	239	172	139	222	118	150	168	137	183.11	238	160	152	0.674	-0.57	0.0252863838668628	0.0365036049250351
CUT_GIM_1301	1	2	2	1	1	1	3	0	3	1	2	2	1	1	1	3	0	3	1.54	2	1	2	0.795	-0.332	0.735299017352439	0.777549933651307
CUT_GIM_1302	20	12	30	23	13	30	41	35	30	17	12	26	27	15	29	41	28	29	25.03	18	24	33	1.249	0.32	0.423827843415027	0.483346557836245
CUT_GIM_1303	1	4	6	41	48	31	3	3	5	1	4	5	47	55	30	3	2	5	16.99	3	44	3	11.024	3.463	5.06472067057511e-08	1.2558100096826e-07
CUT_GIM_1304	20	16	19	331	59	123	19	33	28	17	17	17	381	67	121	19	27	27	76.96	17	190	24	8.792	3.136	1.58550428999131e-10	4.68002099844367e-10
CUT_GIM_1305	1	0	0	0	2	3	2	0	0	1	0	0	0	2	3	2	0	0	0.9	0	2	1	2.537	1.343	0.216980088060602	0.265177714816586
CUT_GIM_1306	3	1	5	2	1	4	1	2	2	2	1	4	2	1	4	1	2	2	2.21	2	2	2	0.957	-0.063	0.941163675562163	0.952575672321101
CUT_GIM_1307	26	14	14	48	22	66	16	24	27	22	15	12	55	25	65	16	20	26	28.4	16	48	21	2.738	1.453	0.000818578117271559	0.00140923745999344
CUT_GIM_1308	70	72	62	1044	241	771	212	222	215	58	75	54	1203	274	758	214	181	210	336.32	62	745	202	10.032	3.327	1.77369926216989e-17	8.34438388796995e-17
CUT_GIM_1309	35	21	40	334	198	399	55	53	34	29	22	35	385	225	392	56	43	33	135.55	29	334	44	11.053	3.466	4.80624613973517e-30	4.70006630869835e-29
CUT_GIM_1310	9	4	14	27	15	31	9	11	8	7	4	12	31	17	30	9	9	8	14.26	8	26	9	3.073	1.62	0.00160068763451776	0.00267070755239499
CUT_GIM_1311	19	14	23	47	27	46	32	43	57	16	15	20	54	31	45	32	35	56	33.73	17	43	41	2.478	1.309	0.000607203391272055	0.00105954589075784
CUT_GIM_1312	27	12	8	92	44	61	20	26	35	22	12	7	106	50	60	20	21	34	37.05	14	72	25	4.836	2.274	3.59909183321175e-07	8.36329034856085e-07
CUT_GIM_1313	1	4	3	1	1	0	1	1	0	1	4	3	1	1	0	1	1	0	1.3	3	1	1	0.451	-1.149	0.266356699045701	0.31885314331572
CUT_GIM_1314	2	1	0	1	1	2	1	1	2	2	1	0	1	1	2	1	1	2	1.19	1	1	1	1.333	0.414	0.679928655830935	0.728008585934195
CUT_GIM_1315	13	6	8	2	1	1	6	4	3	11	6	7	2	1	1	6	3	3	4.52	8	1	4	0.245	-2.031	0.0157031269841309	0.0233113239248671
CUT001	21	26	29	177	147	342	47	53	44	17	27	25	204	167	336	47	43	43	101.19	23	236	44	9.504	3.249	1.03126724984632e-22	6.58905909333192e-22
CUT002	5	4	8	52	19	30	11	13	9	4	4	7	60	22	29	11	11	9	17.42	5	37	10	6.107	2.61	2.31426722190995e-06	5.03153986143994e-06
CUT003	7	9	13	19	25	21	2	15	5	6	9	11	22	28	21	2	12	5	12.96	9	24	6	2.493	1.318	0.0138902171073503	0.0207598256959324
CUT004	21	24	35	579	278	190	33	42	41	17	25	31	667	316	187	33	34	40	150.07	24	390	36	13.588	3.764	8.89699217810138e-19	4.48921634686065e-18
CUT005	6	7	8	29	17	13	2	7	8	5	7	7	33	19	13	2	6	8	11.15	6	22	5	3.037	1.603	0.00877432212329468	0.0134140146955549
CUT006	4	5	5	11	7	7	4	9	5	3	5	4	13	8	7	4	7	5	6.3	4	9	5	1.912	0.935	0.146585797403616	0.185550436358174
CUT007	25	14	24	38	22	24	20	10	11	21	15	21	44	25	24	20	8	11	20.86	19	31	13	1.538	0.621	0.124039100997028	0.159463249092549
CUT008	0	0	1	3	1	3	1	1	2	0	0	1	3	1	3	1	1	2	1.36	0	2	1	3.374	1.754	0.0998333618283019	0.130439698828884
CUT009	14	17	15	16	13	19	15	16	14	12	18	13	18	15	19	15	13	14	15.13	14	17	14	1.206	0.27	0.538376088604824	0.594543845344545
CUT010	1	1	1	1	1	1	1	1	0	1	1	1	1	1	1	1	1	0	0.87	1	1	1	1.106	0.145	0.886810543247316	0.908421108729675
CUT011	17	15	18	34	29	44	22	15	24	14	16	16	39	33	43	22	12	23	24.3	15	38	19	2.426	1.279	0.00134416601174027	0.00226534814150517
CUT012	5	6	4	31	44	56	5	11	14	4	6	4	36	50	55	5	9	14	20.26	5	47	9	8.947	3.161	1.33728422054666e-09	3.70583433751679e-09
CUT013	3	0	3	0	1	1	1	1	2	2	0	3	0	1	1	1	1	2	1.22	2	1	1	0.631	-0.665	0.517493409055894	0.574359196336516
CUT014	48	27	31	241	90	234	68	61	79	40	28	27	278	102	230	69	50	77	100.06	32	203	65	5.912	2.564	6.50238692166869e-16	2.7987806101886e-15
CUT015	2262	1163	1546	370	111	355	1095	825	952	1873	1210	1353	426	126	349	1106	671	930	894.04	1479	300	902	0.192	-2.378	1.08698839718412e-18	5.45642027899209e-18
CUT016	17	11	16	27	13	15	13	14	16	14	11	14	31	15	15	13	11	16	15.59	13	20	13	1.428	0.514	0.256608280843078	0.308257028159149
CUT017	57	52	65	1648	653	1693	140	180	144	47	54	57	1899	743	1664	141	146	141	543.58	53	1435	143	24.568	4.619	6.24509678571655e-48	1.53966668856295e-46
CUT018	4	6	6	20	8	23	6	8	5	3	6	5	23	9	23	6	7	5	9.67	5	18	6	3.24	1.696	0.00591077313196656	0.00923563241344581
CUT019	30	16	18	116	50	69	35	27	27	25	17	16	134	57	68	35	22	26	44.37	19	86	28	4.227	2.08	1.34559637593863e-09	3.72710103086487e-09
CUT020	3	5	3	27	20	45	2	12	4	2	5	3	31	23	44	2	10	4	13.79	3	33	5	8.345	3.061	3.16144973412933e-06	6.79380316164681e-06
CUT021	20	11	18	54	46	89	28	24	24	17	11	16	62	52	87	28	20	23	35.23	15	67	24	4.412	2.141	8.12902744548095e-09	2.13617752929819e-08
CUT022	10	7	20	6	8	9	18	4	17	8	7	18	7	9	9	18	3	17	10.66	11	8	13	0.838	-0.255	0.656609410406988	0.706875870107421
CUT023	7	5	5	17	8	11	13	7	6	6	5	4	20	9	11	13	6	6	8.84	5	13	8	2.26	1.177	0.0435405229186909	0.0605443301794172
CUT024	15	15	11	11	5	21	18	16	27	12	16	10	13	6	21	18	13	26	14.92	13	13	19	0.967	-0.048	0.923567211187632	0.93907174763881
CUT025	194	149	173	1381	787	1073	1070	1075	1140	161	155	151	1591	895	1054	1081	875	1114	786.44	156	1180	1023	7.267	2.861	3.12172961791172e-37	4.60031933353296e-36
CUT026	11	10	22	18	19	40	11	6	27	9	10	19	21	22	39	11	5	26	18.09	13	27	14	2.02	1.014	0.0273990591885936	0.039378355144251
CUT027	59	38	52	112	51	76	51	35	54	49	40	46	129	58	75	52	28	53	58.72	45	87	44	1.834	0.875	0.00449979879435359	0.00713592735931823
CUT028	2	1	3	3	0	3	4	5	5	2	1	3	3	0	3	4	4	5	2.75	2	2	4	1.09	0.124	0.886597313232021	0.90828230055487
CUT029	19	11	12	3	3	0	8	9	7	16	11	11	3	3	0	8	7	7	7.42	13	2	7	0.212	-2.239	0.00275832546993944	0.00448251862629847
CUT030	93	55	74	371	209	471	93	110	120	77	57	65	427	238	463	94	90	117	180.87	66	376	100	5.412	2.436	3.84148114360883e-21	2.22897460994106e-20
CUT031	6	5	7	54	24	62	16	19	18	5	5	6	62	27	61	16	15	18	24	5	50	16	8.12	3.021	1.28445550286406e-09	3.56535558348442e-09
CUT032	12	15	18	110	58	59	12	13	17	10	16	16	127	66	58	12	11	17	36.81	14	84	13	5.531	2.468	2.15644371051707e-08	5.49982566588881e-08
CUT033	0	0	1	1	1	1	0	1	2	0	0	1	1	1	1	0	1	2	0.77	0	1	1	1.931	0.949	0.376881898621033	0.434943893668318
CUT034	5	4	6	5	0	0	2	2	1	4	4	5	6	0	0	2	2	1	2.66	4	2	2	0.377	-1.406	0.143315016088638	0.181863316105095
CUT035	69	39	69	427	138	173	51	69	90	57	41	60	492	157	170	52	56	88	130.3	53	273	65	4.613	2.206	1.7507897622311e-08	4.48875146148149e-08
CUT036	7	5	7	35	18	34	20	11	26	6	5	6	40	20	33	20	9	25	18.43	6	31	18	4.999	2.322	4.98473687160105e-06	1.05337495626636e-05
CUT037	26	16	20	41	37	51	31	22	15	22	17	18	47	42	50	31	18	15	28.78	19	46	21	2.438	1.286	0.000800255187520905	0.00137911548759317
CUT038	18	15	11	82	51	93	13	20	11	15	16	10	94	58	91	13	16	11	36.02	14	81	13	5.791	2.534	6.04169422599796e-10	1.71200869847265e-09
CUT039	8	0	3	23	11	14	6	10	9	7	0	3	27	13	14	6	8	9	9.45	3	18	8	4.904	2.294	0.00106487143810002	0.00181031242735479
CUT040	31	16	14	104	36	83	28	29	21	26	17	12	120	41	82	28	24	21	41.04	18	81	24	4.16	2.057	1.68382611277428e-07	4.01739321230711e-07
CUT041	24	18	24	4	2	4	14	12	17	20	19	21	5	2	4	14	10	17	12.33	20	4	14	0.204	-2.292	0.000157475343872056	0.000290811768092421
CUT042	12	4	6	2	3	2	5	3	5	10	4	5	2	3	2	5	2	5	4.38	6	2	4	0.492	-1.023	0.172943522149869	0.215575253316626
CUT043	18	4	13	73	22	74	31	14	30	15	4	11	84	25	73	31	11	29	31.59	10	61	24	5.626	2.492	7.32905900303252e-10	2.06727935093985e-09
CUT044	9	9	12	5	5	8	8	5	3	7	9	11	6	6	8	8	4	3	6.86	9	7	5	0.75	-0.414	0.49096979501192	0.548515585517141
CUT045	2	4	3	0	0	2	2	2	2	2	4	3	0	0	2	2	2	2	1.78	3	1	2	0.379	-1.4	0.170394285301927	0.212783459931429
CUT046	11	17	20	1011	719	1081	90	85	99	9	18	18	1165	818	1062	91	69	97	371.8	15	1015	86	63.787	5.995	2.25849094629709e-77	2.83360980475996e-75
CUT047	7	2	6	79	38	59	6	14	4	6	2	5	91	43	58	6	11	4	25.19	4	64	7	12.105	3.598	7.67403358471647e-11	2.32690079063302e-10
CUT048	36	22	31	33	24	42	40	31	36	30	23	27	38	27	41	40	25	35	31.92	27	35	33	1.306	0.385	0.250414637177375	0.30196527190742
CUT049	5	7	9	3	3	4	3	1	3	4	7	8	3	3	4	3	1	3	4.1	6	3	2	0.633	-0.66	0.360173443669205	0.417806915100092
CUT050	41	39	45	278	232	591	144	180	170	34	41	39	320	264	581	145	146	166	193	38	388	152	9.498	3.248	6.82591685769108e-29	6.21243492203878e-28
CUT051	13	7	8	5	15	28	12	9	6	11	7	7	6	17	28	12	7	6	11.19	8	17	8	1.807	0.854	0.151315066115671	0.19106081713968
CUT052	29	17	30	99	128	111	17	26	28	24	18	26	114	146	109	17	21	27	55.82	23	123	22	5.204	2.38	1.48025318585018e-12	5.05944391045488e-12
CUT053	4	0	2	1	1	1	0	1	0	3	0	2	1	1	1	0	1	0	1.02	2	1	0	0.811	-0.302	0.77026783002219	0.808020633899399
CUT054	16	9	15	31	30	53	12	8	18	13	9	13	36	34	52	12	7	18	21.54	12	41	12	3.232	1.692	8.21680035656095e-05	0.000155853804523245
CUT055	3	4	6	5	2	5	4	11	9	2	4	5	6	2	5	4	9	9	5.18	4	4	7	1.098	0.135	0.845021142423898	0.873036607759321
CUT056	9	7	5	10	6	10	5	6	10	7	7	4	12	7	10	5	5	10	7.44	6	10	7	1.371	0.455	0.440040793813551	0.499011811402733
CUT057	8	8	9	33	18	41	9	4	13	7	8	8	38	20	40	9	3	13	16.3	8	33	8	3.876	1.955	0.000125091605942217	0.000233517652881908
CUT058	17	10	7	6	7	10	3	3	6	14	10	6	7	8	10	3	2	6	7.41	10	8	4	0.836	-0.259	0.658591503720488	0.708813806638204
CUT059	8	5	14	31	18	21	7	11	2	7	5	12	36	20	21	7	9	2	13.21	8	26	6	2.769	1.469	0.0105376201490489	0.0159738784617701
CUT060	2	2	3	1	1	4	2	2	4	2	2	3	1	1	4	2	2	4	2.24	2	2	3	0.931	-0.104	0.904439771533234	0.922839707512213
CUT061	45	41	76	187	219	198	38	39	57	37	43	67	215	249	195	38	32	56	103.49	49	220	42	4.519	2.176	1.16596712851664e-12	4.00749760701337e-12
CUT062	53	34	61	274	123	269	69	105	91	44	35	53	316	140	264	70	85	89	121.86	44	240	81	5.158	2.367	5.637807384574e-14	2.13214942058679e-13
CUT063	4	6	11	123	40	63	13	7	8	3	6	10	142	45	62	13	6	8	32.77	6	83	9	10.366	3.374	6.85814336873765e-11	2.0876338475402e-10
CUT064	37	20	25	30	18	38	27	26	28	31	21	22	35	20	37	27	21	27	26.84	25	31	25	1.228	0.296	0.410987823163607	0.470401929626828
CUT065	39	32	64	98	74	156	76	76	77	32	33	56	113	84	153	77	62	75	76.21	40	117	71	2.822	1.497	2.00901838282216e-07	4.75154600721712e-07
CUT066	10	10	18	177	69	123	13	25	21	8	10	16	204	78	121	13	20	21	54.64	11	134	18	10.487	3.391	4.32070633744604e-14	1.64898021748512e-13
CUT067	14	7	19	20	18	40	14	10	10	12	7	17	23	20	39	14	8	10	16.71	12	27	11	2.214	1.147	0.0128499112695104	0.0192913750122685
CUT068	11	7	13	6	12	16	4	1	9	9	7	11	7	14	16	4	1	9	8.63	9	12	5	1.249	0.321	0.579375369670524	0.634008855695266
CUT069	1	0	1	0	0	2	0	3	1	1	0	1	0	0	2	0	2	1	0.79	1	1	1	0.967	-0.049	0.963473397580098	0.970951200769319
CUT070	5	4	7	7	9	6	4	5	4	4	4	6	8	10	6	4	4	4	5.63	5	8	4	1.519	0.604	0.340859535868843	0.397533386842644
CUT071	67	44	58	87	44	91	31	59	52	55	46	51	100	50	89	31	48	51	57.99	51	80	43	1.513	0.598	0.070311795525785	0.0944882379447037
CUT072	19	15	20	504	172	388	54	63	67	16	16	18	581	196	381	55	51	65	153.09	17	386	57	20.785	4.377	3.12318017390429e-33	3.65340175297753e-32
CUT073	1	0	0	0	0	1	2	2	0	1	0	0	0	0	1	2	2	0	0.61	0	0	1	1.085	0.118	0.910055138722081	0.92784662626882
CUT074	6	7	11	11	16	30	3	7	5	5	7	10	13	18	29	3	6	5	10.65	7	20	5	2.502	1.323	0.0135201292487712	0.0202429507240411
CUT075	10	5	0	0	0	0	4	2	2	8	5	0	0	0	0	4	2	2	2.35	4	0	3	0.177	-2.499	0.0217485761057625	0.0317018660810703
CUT076	37	16	26	30	25	34	30	29	43	31	17	23	35	28	33	30	24	42	29.16	24	32	32	1.356	0.439	0.226103619931418	0.274976262099964
CUT077	7	13	9	17	26	26	3	4	11	6	14	8	20	30	26	3	3	11	13.22	9	25	6	2.581	1.368	0.0110592877327965	0.0167169624169525
CUT078	41	21	33	17	9	17	18	21	19	34	22	29	20	10	17	18	17	19	20.56	28	16	18	0.571	-0.809	0.0473506021906775	0.0654761729026455
CUT079	9	14	9	22	14	24	3	7	3	7	15	8	25	16	24	3	6	3	11.82	10	22	4	2.106	1.075	0.0425122328719281	0.0592413490748094
CUT080	3	2	11	9	5	8	3	4	6	2	2	10	10	6	8	3	3	6	5.58	5	8	4	1.712	0.776	0.254153105559226	0.305716231761721
CUT081	9	15	24	28	19	32	13	8	11	7	16	21	32	22	31	13	7	11	17.75	15	28	10	1.848	0.886	0.0586902649225891	0.0798526529148185
CUT082	7	1	1	0	2	3	0	0	2	6	1	1	0	2	3	0	0	2	1.65	3	2	1	0.73	-0.454	0.65228972373226	0.702873002446767
CUT083	12	9	9	2	6	8	3	6	4	10	9	8	2	7	8	3	5	4	6.22	9	6	4	0.651	-0.62	0.323523530829651	0.379283304702579
CUT084	10	10	9	15	4	16	10	15	16	8	10	8	17	5	16	10	12	16	11.34	9	13	13	1.301	0.38	0.481791789060971	0.539499697869539
CUT085	6	4	8	133	81	123	16	22	11	5	4	7	153	92	121	16	18	11	47.47	5	122	15	19.741	4.303	5.14894504975974e-21	2.96552843033476e-20
CUT086	12	7	16	29	13	19	6	8	6	10	7	14	33	15	19	6	7	6	12.95	10	22	6	1.953	0.966	0.0544454777927546	0.0745197767025218
CUT087	21	4	9	109	98	121	21	20	26	17	4	8	126	111	119	21	16	25	49.81	10	119	21	11.539	3.528	1.16560858252957e-17	5.53936636658829e-17
CUT088	20	27	27	45	37	37	21	24	16	17	28	24	52	42	36	21	20	16	28.33	23	43	19	1.839	0.879	0.0189412332164145	0.0278529320960135
CUT089	38	29	37	347	206	483	71	62	81	31	30	32	400	234	475	72	50	79	156.02	31	370	67	11.083	3.47	9.96234100082785e-37	1.42322636840678e-35
CUT090	32	24	36	217	184	164	96	131	103	27	25	32	250	209	161	97	107	101	111.97	28	207	102	7.16	2.84	2.1734391565175e-22	1.36186648702753e-21
CUT091	90	81	95	887	1143	968	195	238	180	75	84	83	1022	1300	951	197	194	176	453.54	81	1091	189	13.146	3.717	1.60935296304196e-70	1.52901615659417e-68
CUT092	35	10	27	32	29	23	17	19	26	29	10	24	37	33	23	17	15	25	23.73	21	31	19	1.462	0.548	0.198070014788533	0.243903708410832
CUT093	78	58	73	594	512	440	111	135	147	65	60	64	684	582	432	112	110	144	250.41	63	566	122	8.703	3.121	1.50395118305009e-32	1.68829716859975e-31
CUT094	28	26	27	14	8	4	20	21	18	23	27	24	16	9	4	20	17	18	17.55	25	10	18	0.399	-1.325	0.00752201252756267	0.0116073205330909
CUT095	2	5	4	0	1	4	2	0	1	2	5	4	0	1	4	2	0	1	2.05	4	2	1	0.562	-0.832	0.385648628589188	0.444402906389236
CUT096	8	8	15	14	11	13	7	7	9	7	8	13	16	13	13	7	6	9	10.12	9	14	7	1.429	0.515	0.316814669651454	0.372464409411156
CUT097	15	7	7	122	44	183	69	52	57	12	7	6	141	50	180	70	42	56	62.67	8	124	56	12.362	3.628	1.3565137825848e-16	6.06435350546518e-16
CUT098	17	7	12	32	32	31	14	19	23	14	7	11	37	36	30	14	15	22	20.85	11	34	17	3.082	1.624	0.000309811707648437	0.00055630909889054
CUT099	3	5	5	32	18	30	5	8	6	2	5	4	37	20	29	5	7	6	12.92	4	29	6	6.321	2.66	7.61030787499533e-06	1.58414780597071e-05
CUT100	21	17	26	320	131	236	71	82	104	17	18	23	369	149	232	72	67	102	116.4	19	250	80	11.853	3.567	4.11973873412506e-24	2.86567064565389e-23
CUT101	7	2	11	2	2	0	6	4	3	6	2	10	2	2	0	6	3	3	3.81	6	1	4	0.35	-1.513	0.0869212665990097	0.114788328791505
CUT102	4	6	9	38	16	28	6	15	11	3	6	8	44	18	28	6	12	11	15.11	6	30	10	4.646	2.216	0.000140318492772466	0.000260610601802136
CUT103	23	13	30	80	47	137	28	30	22	19	14	26	92	53	135	28	24	22	45.92	20	93	25	4.474	2.161	7.75958612773334e-09	2.04184921163458e-08
CUT104	2	2	0	1	1	2	3	2	1	2	2	0	1	1	2	3	2	1	1.51	1	1	2	1.239	0.309	0.750319635259993	0.791356972711938
CUT105	11	8	14	125	110	197	29	35	25	9	8	12	144	125	194	29	28	24	63.85	10	154	27	14.433	3.851	2.23920921392065e-25	1.68930915906241e-24
CUT106	20	17	26	448	140	267	57	53	53	17	18	23	516	159	262	58	43	52	127.48	19	312	51	14.149	3.823	3.1712503885672e-25	2.37559179748694e-24
CUT107	1	2	2	7	5	7	1	2	4	1	2	2	8	6	7	1	2	4	3.54	2	7	2	3.428	1.777	0.0368353382887566	0.0518373992343942
CUT108	11	16	11	7	5	11	8	8	7	9	17	10	8	6	11	8	7	7	9.04	12	8	7	0.743	-0.429	0.435021079265812	0.494422907245699
CUT109	16	11	25	8	5	8	8	16	9	13	11	22	9	6	8	8	13	9	11.03	15	8	10	0.535	-0.903	0.0966671283422798	0.126684876429032
CUT110	53	32	57	48	19	47	30	27	29	44	33	50	55	22	46	30	22	28	36.76	42	41	27	0.944	-0.084	0.798548486030407	0.83349746407211
CUT111	15	9	18	60	21	45	14	13	20	12	9	16	69	24	44	14	11	20	24.34	12	46	15	3.351	1.745	6.46448951072459e-05	0.000123720970229819
CUT112	3	1	6	2	3	1	1	2	3	2	1	5	2	3	1	1	2	3	2.34	3	2	2	0.876	-0.192	0.823755725879372	0.855148744125997
CUT113	25	26	20	594	336	449	54	62	53	21	27	18	684	382	441	55	50	52	192.21	22	502	52	21.599	4.433	2.38145379152648e-46	5.4890865893054e-45
CUT114	3	4	6	45	20	62	8	13	12	2	4	5	52	23	61	8	11	12	19.76	4	45	10	9.651	3.271	9.82268644774824e-09	2.56165842062901e-08
CUT115	1	2	1	1	0	2	3	0	0	1	2	1	1	0	2	3	0	0	1.1	1	1	1	0.796	-0.328	0.753117565169765	0.793467999594912
CUT116	1	2	1	2	5	4	3	2	1	1	2	1	2	6	4	3	2	1	2.37	1	4	2	2.38	1.251	0.168724100415209	0.210810417775273
CUT117	3	0	3	5	2	1	0	2	2	2	0	3	6	2	1	0	2	2	1.97	2	3	1	1.491	0.577	0.54626638206907	0.602176109882006
CUT118	23	17	20	43	70	140	13	29	29	19	18	18	50	80	138	13	24	28	42.9	18	89	22	4.335	2.116	3.90373103186631e-08	9.77899267703959e-08
CUT119	23	25	15	132	71	87	23	26	28	19	26	13	152	81	85	23	21	27	49.81	19	106	24	5.16	2.367	6.09874628586636e-10	1.72733759322914e-09
CUT120	3	1	4	4	1	5	4	4	0	2	1	4	5	1	5	4	3	0	2.78	2	4	2	1.318	0.398	0.646761815942017	0.697835929391383
CUT121	24	22	20	54	36	54	11	9	16	20	23	18	62	41	53	11	7	16	27.84	20	52	11	2.459	1.298	0.000882384743626653	0.00151373284116575
CUT122	10	7	8	21	13	5	7	11	13	8	7	7	24	15	5	7	9	13	10.58	7	15	10	1.686	0.753	0.198163881142178	0.243968235530652
CUT123	11	14	20	213	67	142	34	37	55	9	15	18	245	76	140	34	30	54	68.95	14	154	39	9.782	3.29	4.93647023362201e-14	1.87601922439372e-13
CUT124	30	19	16	201	133	211	73	83	49	25	20	14	232	151	207	74	68	48	93.12	20	197	63	9.749	3.285	3.18681281872685e-24	2.23804655045925e-23
CUT125	0	0	3	47	15	45	2	1	2	0	0	3	54	17	44	2	1	2	13.65	1	38	2	25.456	4.67	2.48619857184921e-08	6.31328042386567e-08
CUT126	30	19	40	147	133	297	90	129	95	25	20	35	169	151	292	91	105	93	108.99	27	204	96	7.287	2.865	8.97069224529436e-20	4.82427563637874e-19
CUT127	6	4	2	7	9	6	9	15	5	5	4	2	8	10	6	9	12	5	6.81	4	8	9	2.02	1.014	0.118274878397444	0.152623700193522
CUT128	5	6	12	10	9	5	10	12	12	4	6	11	12	10	5	10	10	12	8.8	7	9	11	1.239	0.309	0.594726950257586	0.648500433023248
CUT129	42	41	58	79	57	78	75	62	57	35	43	51	91	65	77	76	50	56	60.3	43	78	61	1.755	0.812	0.00761965112212703	0.0117486796428522
CUT130	6	4	10	6	11	7	4	4	3	5	4	9	7	13	7	4	3	3	6.05	6	9	3	1.363	0.447	0.473758746523082	0.531727306172564
CUT131	33	39	59	116	189	217	38	56	45	27	41	52	134	215	213	38	46	44	89.93	40	187	43	4.608	2.204	5.32833817163886e-16	2.30532987314964e-15
CUT132	7	6	7	0	1	1	4	1	8	6	6	6	0	1	1	4	1	8	3.66	6	1	4	0.201	-2.311	0.0199575807469379	0.029233428003098
CUT133	15	15	17	21	21	36	11	16	11	12	16	15	24	24	35	11	13	11	17.92	14	28	12	1.853	0.89	0.0357374915029681	0.0504138490709422
CUT134	5	3	4	1	3	5	2	3	1	4	3	4	1	3	5	2	2	1	2.85	4	3	2	0.891	-0.166	0.833861686207762	0.863492039434994
CUT135	28	22	28	243	170	325	56	49	47	23	23	25	280	193	319	57	40	46	111.75	24	264	48	10.709	3.421	4.21816966424202e-32	4.64595011275516e-31
CUT136	16	6	13	228	86	158	27	28	25	13	6	11	263	98	155	27	23	24	69.02	10	172	25	14.966	3.904	1.00991520112616e-24	7.34861085950208e-24
CUT137	1	1	2	2	0	0	0	0	0	1	1	2	2	0	0	0	0	0	0.66	1	1	0	0.698	-0.518	0.625880100049203	0.678607798216273
CUT138	4	3	4	2	1	6	1	5	6	3	3	4	2	1	6	1	4	6	3.36	3	3	4	0.878	-0.187	0.812357145031032	0.845644539179818
CUT139	19	19	27	287	154	181	52	51	51	16	20	24	331	175	178	53	42	50	98.53	20	228	48	10.635	3.411	3.04750119571458e-23	2.00976856507453e-22
CUT140	9	4	6	4	3	2	1	5	2	7	4	5	5	3	2	1	4	2	3.77	5	3	2	0.644	-0.635	0.39826050580184	0.457537580692126
CUT141	2	3	5	7	1	2	2	1	3	2	3	4	8	1	2	2	1	3	2.9	3	4	2	1.031	0.044	0.957006523714875	0.965516553235952
CUT142	8	6	6	24	8	15	9	8	12	7	6	5	28	9	15	9	7	12	10.77	6	17	9	2.456	1.296	0.0220433470240006	0.0321075100738466
CUT143	7	6	11	26	28	36	11	9	7	6	6	10	30	32	35	11	7	7	16.01	7	32	8	4.172	2.061	3.41846921015028e-05	6.73549674419426e-05
CUT144	91	72	85	78	79	62	45	59	45	75	75	74	90	90	61	45	48	44	66.98	75	80	46	1.056	0.078	0.767839951433046	0.805980209507462
CUT145	6	4	5	13	10	14	2	6	7	5	4	4	15	11	14	2	5	7	7.48	4	13	5	2.614	1.386	0.0275486050806681	0.0395786819489412
CUT146	43	23	17	7	9	28	41	23	19	36	24	15	8	10	28	41	19	19	22.11	25	15	26	0.674	-0.568	0.271426784418196	0.324324478804809
CUT147	12	6	21	56	21	54	22	25	28	10	6	18	65	24	53	22	20	27	27.33	11	47	23	3.865	1.95	1.12504046390128e-05	2.31180285935472e-05
CUT148	20	10	21	127	67	73	18	21	10	17	10	18	146	76	72	18	17	10	42.74	15	98	15	5.877	2.555	6.31819325469515e-11	1.9272880807718e-10
CUT149	32	24	28	53	37	82	40	26	26	27	25	25	61	42	81	40	21	25	38.52	26	61	29	2.302	1.203	0.000830717048518687	0.00142929320214802
CUT150	10	11	11	4	0	1	9	9	3	8	11	10	5	0	1	9	7	3	6.03	10	2	6	0.222	-2.171	0.00898325960136875	0.0137226629675288
CUT151	119	47	81	549	266	403	142	149	140	99	49	71	633	303	396	143	121	137	216.79	73	444	134	5.911	2.563	6.87533780217657e-25	5.05315707900852e-24
CUT152	20	20	20	34	8	29	29	19	18	17	21	18	39	9	28	29	15	18	21.56	19	25	21	1.241	0.311	0.491044231808357	0.548546304647018
CUT153	32	26	43	187	83	244	73	73	67	27	27	38	215	94	240	74	59	65	93.28	31	183	66	5.597	2.485	4.30110359768536e-14	1.64203517290268e-13
CUT154	2	2	2	96	39	79	12	6	12	2	2	2	111	44	78	12	5	12	29.65	2	78	10	31.073	4.958	1.28053074289209e-14	5.0795255469915e-14
CUT155	1739	827	1065	146	63	146	775	530	677	1440	861	932	168	72	143	783	431	662	610.26	1078	128	625	0.118	-3.085	2.56691658176966e-42	4.98288823497678e-41
CUT156	23	9	13	82	95	120	15	17	16	19	9	11	94	108	118	15	14	16	44.99	13	107	15	7.642	2.934	7.04722903927244e-15	2.84764586974197e-14
CUT157	3	2	4	1	0	1	5	3	4	2	2	4	1	0	1	5	2	4	2.4	3	1	4	0.397	-1.334	0.17164108620797	0.214203089857576
CUT158	9	14	13	91	50	49	25	34	25	7	15	11	105	57	48	25	28	24	35.63	11	70	26	5.751	2.524	9.84423965064659e-09	2.56613394060799e-08
CUT159	4	0	2	49	31	49	9	14	14	3	0	2	56	35	48	9	11	14	19.9	2	46	11	19.765	4.305	1.47434134736908e-10	4.36844649730098e-10
CUT160	21	13	14	16	10	25	4	11	11	17	14	12	18	11	25	4	9	11	13.48	14	18	8	1.191	0.253	0.60165675735057	0.655139849645803
CUT161	3	4	3	11	8	9	3	7	4	2	4	3	13	9	9	3	6	4	5.84	3	10	4	2.877	1.525	0.0280302292032169	0.0401829721280664
CUT162	3	3	7	17	13	34	13	14	12	2	3	6	20	15	33	13	11	12	12.86	4	23	12	5.08	2.345	7.44176763451424e-05	0.000141820770673407
CUT163	10	5	20	3	2	4	9	8	5	8	5	18	3	2	4	9	7	5	6.79	10	3	7	0.381	-1.391	0.048414827204914	0.0668686527262291
CUT164	6	2	5	6	6	13	1	5	3	5	2	4	7	7	13	1	4	3	5.11	4	9	3	1.941	0.957	0.17103195503924	0.213534126772282
CUT165	12	3	2	54	38	47	9	6	14	10	3	2	62	43	46	9	5	14	21.57	5	50	9	9.365	3.227	9.34688422910095e-09	2.4408422145536e-08
CUT166	9	3	11	37	19	23	5	5	2	7	3	10	43	22	23	5	4	2	13.12	7	29	4	3.799	1.925	0.000503823794840992	0.000885366145340125
CUT167	65	41	50	343	136	235	89	94	105	54	43	44	395	155	231	90	77	103	132.24	47	260	90	5.171	2.37	3.08044080950762e-15	1.27066824214282e-14
CUT168	10	7	6	2	1	1	3	7	5	8	7	5	2	1	1	3	6	5	4.32	7	1	5	0.285	-1.813	0.0317936309478486	0.0452215641743621
CUT169	6	7	9	31	16	33	6	9	12	5	7	8	36	18	32	6	7	12	14.62	7	29	8	3.927	1.974	0.00018623629238847	0.000340908100384032
CUT170	1	1	2	0	1	3	1	3	3	1	1	2	0	1	3	1	2	3	1.57	1	1	2	0.976	-0.035	0.9714598845419	0.976503544100048
CUT171	3	4	8	28	16	30	11	9	9	2	4	7	32	18	29	11	7	9	13.43	4	26	9	5.226	2.386	2.9396676850812e-05	5.83539265633751e-05
CUT172	3	2	2	18	39	30	16	12	15	2	2	2	21	44	29	16	10	15	15.72	2	31	14	11.51	3.525	1.27131280985968e-07	3.05439175493838e-07
CUT173	9	7	3	9	8	32	11	8	13	7	7	3	10	9	31	11	7	13	10.96	6	17	10	2.342	1.228	0.0485304810571819	0.0670046315730421
CUT174	4	6	7	59	57	64	18	11	15	3	6	6	68	65	63	18	9	15	28.13	5	65	14	11.262	3.493	6.90920204905561e-13	2.41377982497052e-12
CUT175	88	71	81	64	23	35	74	61	55	73	74	71	74	26	34	75	50	54	58.9	73	45	60	0.592	-0.757	0.0228178369248858	0.0331735807793252
CUT176	1	1	2	2	0	0	1	0	0	1	1	2	2	0	0	1	0	0	0.77	1	1	0	0.608	-0.718	0.502970353516585	0.560208878306787
CUT177	7	7	12	19	6	16	11	13	5	6	7	11	22	7	16	11	11	5	10.51	8	15	9	1.669	0.739	0.197243276102786	0.24291125772338
CUT178	15	4	12	16	6	6	3	3	9	12	4	11	18	7	6	3	2	9	8.06	9	10	5	1.138	0.187	0.756653308111875	0.796097106202878
CUT179	12	6	9	23	15	13	6	4	8	10	6	8	27	17	13	6	3	8	10.84	8	19	6	2.143	1.1	0.0399963462819599	0.0559824293509383
CUT180	25	24	26	13	10	26	22	22	20	21	25	23	15	11	26	22	18	20	20	23	17	20	0.769	-0.38	0.364802524806758	0.422338250930431
CUT181	20	32	31	19	10	18	21	32	25	17	33	27	22	11	18	21	26	24	22.18	26	17	24	0.703	-0.508	0.233319185862915	0.282897697239471
CUT182	11	8	13	64	29	77	16	22	21	9	8	11	74	33	76	16	18	21	29.53	9	61	18	5.785	2.532	5.94171863086169e-09	1.57163702852534e-08
CUT183	16	11	25	96	57	83	31	26	32	13	11	22	111	65	82	31	21	31	43.04	15	86	28	5.294	2.404	5.63011456635022e-11	1.72369711350193e-10
CUT184	7	5	10	71	47	60	22	32	23	6	5	9	82	53	59	22	26	22	31.64	7	65	23	8.915	3.156	2.33632983707033e-12	7.87265007958588e-12
CUT185	6	1	7	161	37	62	33	37	43	5	1	6	186	42	61	33	30	42	45.13	4	96	35	17.865	4.159	4.13072913507463e-13	1.46189281261303e-12
CUT186	1	3	2	14	5	8	3	0	3	1	3	2	16	6	8	3	0	3	4.59	2	10	2	3.531	1.82	0.0299179643780688	0.0427078263385247
CUT187	1	1	2	13	3	8	4	5	2	1	1	2	15	3	8	4	4	2	4.44	1	9	3	4.671	2.224	0.0109761138409811	0.0166019759701922
CUT188	14	8	12	8	4	2	14	6	8	12	8	11	9	5	2	14	5	8	8.11	10	5	9	0.526	-0.926	0.135239203913687	0.172721894747033
CUT189	32	16	26	105	74	124	24	31	37	27	17	23	121	84	122	24	25	36	53.17	22	109	28	4.787	2.259	2.42060182489685e-12	8.14487559048219e-12
CUT190	1	0	0	11	7	3	8	7	6	1	0	0	13	8	3	8	6	6	4.9	0	8	7	9.69	3.277	0.00123866980868117	0.00209419782758221
CUT191	21	14	20	24	14	21	7	12	17	17	15	18	28	16	21	7	10	17	16.35	17	22	11	1.255	0.328	0.457268394551613	0.516343459148725
CUT192	1	2	2	5	2	5	1	2	7	1	2	2	6	2	5	1	2	7	3.01	2	4	3	2.194	1.134	0.19350500240507	0.238810799250782
CUT193	10	4	7	4	2	2	4	9	8	8	4	6	5	2	2	4	7	8	5.18	6	3	6	0.542	-0.883	0.223523288084485	0.272291581836265
CUT194	4	2	3	10	4	5	1	2	2	3	2	3	12	5	5	1	2	2	3.73	3	7	2	2.102	1.072	0.160789116529117	0.201737343328244
CUT195	4	2	2	6	3	6	2	2	3	3	2	2	7	3	6	2	2	3	3.33	2	5	2	1.893	0.92	0.236593878696002	0.286333478297585
CUT196	13	12	6	17	9	6	11	8	17	11	12	5	20	10	6	11	7	17	10.94	9	12	12	1.17	0.227	0.689477293158966	0.736627504832298
CUT197	78	48	86	92	59	129	45	48	50	65	50	75	106	67	127	45	39	49	69.23	63	100	44	1.536	0.619	0.018852276813479	0.0277291009241429
CUT198	25	24	19	207	66	142	44	47	38	21	25	17	239	75	140	44	38	37	70.59	21	151	40	6.493	2.699	4.41684667591484e-12	1.45764671716297e-11
CUT199	30	20	37	558	344	785	74	98	97	25	21	32	643	391	771	75	80	95	237	26	602	83	21.801	4.446	4.08204702071552e-57	1.63365758507129e-55
CUT200	51	32	39	18	17	25	33	34	33	42	33	34	21	19	25	33	28	32	29.73	36	22	31	0.611	-0.712	0.0441740445731098	0.0613303890794062
CUT201	4	3	4	5	8	4	2	11	9	3	3	4	6	9	4	2	9	9	5.39	3	6	7	1.617	0.693	0.323711478245556	0.379465576765731
CUT202	2	7	3	34	50	66	17	12	14	2	7	3	39	57	65	17	10	14	23.68	4	54	14	12.249	3.615	2.01064365523e-10	5.88586717310064e-10
CUT203	15	7	15	69	82	108	39	48	47	12	7	13	80	93	106	39	39	46	48.46	11	93	41	7.98	2.996	3.25153771955957e-16	1.42686705936062e-15
CUT204	24	21	24	112	63	128	27	31	25	20	22	21	129	72	126	27	25	24	51.8	21	109	25	4.942	2.305	2.20478385999115e-11	6.94477201829018e-11
CUT205	5	6	9	34	16	27	7	8	12	4	6	8	39	18	27	7	7	12	14.16	6	28	9	4.158	2.056	0.000178815401748164	0.000327991961203742
CUT206	31	18	26	531	65	133	21	22	22	26	19	23	612	74	131	21	18	22	104.92	23	272	20	8.223	3.04	2.0436139520635e-10	5.9808847091946e-10
CUT207	3	1	2	7	5	8	5	5	1	2	1	2	8	6	8	5	4	1	4.11	2	7	3	3.216	1.685	0.0394912903356475	0.055321891496329
CUT208	1	0	2	18	24	22	0	3	1	1	0	2	21	27	22	0	2	1	8.41	1	23	1	14.793	3.887	8.35795638897805e-06	1.73421659022723e-05
CUT209	14	11	7	60	31	57	14	16	13	12	11	6	69	35	56	14	13	13	25.49	10	53	13	5.145	2.363	1.27194226560459e-07	3.05527591281712e-07
CUT210	2	1	2	18	10	12	5	9	6	2	1	2	21	11	12	5	7	6	7.4	2	15	6	7.157	2.839	0.000249986670543147	0.000452500655509172
CUT211	29	14	32	83	15	60	15	20	17	24	15	28	96	17	59	15	16	17	31.81	22	57	16	2.221	1.151	0.0108226340195087	0.0163804301453153
CUT212	7	4	7	27	9	29	13	10	7	6	4	6	31	10	28	13	8	7	12.67	5	23	9	3.769	1.914	0.000725514865789391	0.00125512460719687
CUT213	15	16	18	5	6	10	14	6	8	12	17	16	6	7	10	14	5	8	10.45	15	8	9	0.543	-0.882	0.115840473970365	0.149686506607346
CUT214	0	3	2	0	1	8	4	3	1	0	3	2	0	1	8	4	2	1	2.37	2	3	2	1.35	0.432	0.659401672727314	0.709535669812748
CUT215	0	1	1	0	0	0	1	3	1	0	1	1	0	0	0	1	2	1	0.71	1	0	1	0.64	-0.643	0.547632842336421	0.603198998918005
CUT216	8	16	18	32	15	29	18	19	11	7	17	16	37	17	28	18	15	11	18.43	13	27	15	1.964	0.974	0.0494097121671549	0.0681460989478783
CUT217	12	5	8	4	0	4	7	2	0	10	5	7	5	0	4	7	2	0	4.38	7	3	3	0.431	-1.215	0.145104230177666	0.18391410345512
CUT218	1	2	2	0	1	4	3	3	0	1	2	2	0	1	4	3	2	0	1.69	2	2	2	1.025	0.035	0.97148983430662	0.976503544100048
CUT219	15	10	14	20	25	46	13	16	18	12	10	12	23	28	45	13	13	18	19.5	11	32	15	2.548	1.35	0.00190384325981356	0.00314864312683006
CUT220	30	36	43	239	105	139	114	124	128	25	37	38	275	119	137	115	101	125	108.06	33	177	114	4.901	2.293	1.51583532010447e-10	4.48430841871913e-10
CUT221	142	96	103	26	14	19	68	49	83	118	100	90	30	16	19	69	40	81	62.43	103	22	63	0.212	-2.235	2.76379594663849e-10	8.02228500556816e-10
CUT222	21	16	19	5	8	11	10	10	11	17	17	17	6	9	11	10	8	11	11.7	17	9	10	0.539	-0.89	0.078824884903531	0.105033934433599
CUT223	0	5	1	5	3	5	3	1	0	0	5	1	6	3	5	3	1	0	2.67	2	5	1	2.108	1.076	0.254703406316138	0.306220576770616
CUT224	1	0	0	3	1	1	0	0	0	1	0	0	3	1	1	0	0	0	0.71	0	2	0	2.027	1.019	0.344114329804001	0.40096919514304
CUT225	3	3	6	3	1	5	4	1	4	2	3	5	3	1	5	4	1	4	3.24	3	3	3	0.859	-0.22	0.777696680035024	0.814789618333269
CUT226	14	13	22	2	8	10	11	18	8	12	14	19	2	9	10	11	15	8	11.02	15	7	11	0.505	-0.986	0.0828600436477995	0.109946913826296
CUT227	13	9	8	89	112	52	19	18	4	11	9	7	103	127	51	19	15	4	38.44	9	94	13	9.282	3.214	2.4340250188081e-14	9.44670088667932e-14
CUT228	27	24	28	133	79	95	44	42	37	22	25	25	153	90	93	44	34	36	58.12	24	112	38	4.444	2.152	2.42866577672201e-11	7.62121059795203e-11
CUT229	41	23	31	77	18	45	20	17	17	34	24	27	89	20	44	20	14	17	32.12	28	51	17	1.579	0.659	0.0878507800917629	0.115911055227768
CUT230	1	1	1	1	0	1	1	0	2	1	1	1	1	0	1	1	0	2	0.87	1	1	1	0.824	-0.279	0.788878448889574	0.824803932515305
CUT231	45	30	45	26	15	27	26	23	25	37	31	39	30	17	27	26	19	24	27.87	36	25	23	0.693	-0.53	0.131658320020113	0.168516881462765
CUT232	16	8	15	33	33	78	21	27	28	13	8	13	38	38	77	21	22	27	28.61	11	51	23	4.032	2.011	1.15999528417992e-06	2.57419386458916e-06
CUT233	13	15	20	48	57	116	19	12	20	11	16	18	55	65	114	19	10	20	36.28	15	78	16	4.976	2.315	5.07483716695032e-09	1.34967107721851e-08
CUT234	15	7	12	1	0	0	8	6	5	12	7	11	1	0	0	8	5	5	5.47	10	0	6	0.092	-3.447	0.000669772026032489	0.00116351358647475
CUT235	8	0	7	6	6	10	4	4	5	7	0	6	7	7	10	4	3	5	5.39	4	8	4	1.819	0.863	0.224830314637585	0.273712580149476
CUT236	24	15	28	104	70	97	26	27	34	20	16	25	120	80	95	26	22	33	48.47	20	98	27	4.763	2.252	1.24039081873235e-11	3.98658061268049e-11
CUT237	27	18	27	146	64	93	32	26	40	22	19	24	168	73	91	32	21	39	54.41	22	111	31	4.769	2.254	2.27339390490819e-10	6.63060566920761e-10
CUT238	10	4	6	7	3	9	3	2	6	8	4	5	8	3	9	3	2	6	5.39	6	7	4	1.087	0.12	0.851272744163935	0.877943101959205
CUT239	6	6	14	20	7	7	12	10	12	5	6	12	23	8	7	12	8	12	10.37	8	13	11	1.43	0.516	0.373557672027089	0.431576367306827
CUT240	18	6	13	68	44	77	10	12	13	15	6	11	78	50	76	10	10	13	29.91	11	68	11	5.94	2.57	2.34862912212613e-10	6.84270254828371e-10
CUT241	16	9	10	22	20	22	13	10	8	13	9	9	25	23	22	13	8	8	14.46	10	23	10	2.121	1.085	0.0189551945154864	0.0278664490008774
CUT242	4	0	4	15	11	11	2	6	0	3	0	4	17	13	11	2	5	0	6.04	2	14	2	4.197	2.069	0.0116999853270001	0.0176170633335039
CUT243	15	13	10	2	2	2	15	17	14	12	14	9	2	2	2	15	14	14	9.32	12	2	14	0.23	-2.119	0.00272160026468273	0.0044259143742113
CUT244	23	15	22	29	16	32	10	24	22	19	16	19	33	18	31	10	20	22	20.9	18	27	17	1.469	0.554	0.192344866868392	0.237479357023141
CUT245	1	1	1	2	3	3	1	1	0	1	1	1	2	3	3	1	1	0	1.47	1	3	1	2.163	1.113	0.255694099778805	0.30731680037181
CUT246	71	36	71	21	32	105	24	25	36	59	37	62	24	36	103	24	20	35	44.66	53	54	26	0.927	-0.109	0.770842593489804	0.808478419271392
CUT247	19	19	15	1	5	3	11	19	17	16	20	13	1	6	3	11	15	17	11.29	16	3	14	0.225	-2.15	0.000841929403861805	0.00144730612143705
CUT248	2	3	1	2	2	5	2	2	0	2	3	1	2	2	5	2	2	0	2.09	2	3	1	1.585	0.664	0.460429372847345	0.519110241301888
CUT249	2	5	0	0	3	2	1	0	2	2	5	0	0	3	2	1	0	2	1.69	2	2	1	0.85	-0.234	0.816633581471266	0.84896183907777
CUT250	33	34	44	67	34	60	28	31	40	27	35	39	77	39	59	28	25	39	40.96	34	58	31	1.651	0.724	0.0375767059693927	0.0528043994658878
CUT251	20	26	21	630	161	411	67	67	54	17	27	18	726	183	404	68	55	53	172.21	21	438	59	17.515	4.131	2.71100731427651e-23	1.79291632567263e-22
CUT252	11	4	4	11	26	74	11	6	8	9	4	4	13	30	73	11	5	8	17.28	6	39	8	5.484	2.455	0.000155149821267803	0.000286607779218392
CUT253	3	5	6	6	4	3	0	4	2	2	5	5	7	5	3	0	3	2	3.62	4	5	2	1.14	0.189	0.802600385903389	0.837203258918772
CUT254	14	10	20	47	15	30	16	14	13	12	10	18	54	17	29	16	11	13	20.05	13	33	13	2.265	1.179	0.0101017106265133	0.0153429413024999
CUT255	0	1	2	2	1	3	0	2	1	0	1	2	2	1	3	0	2	1	1.31	1	2	1	1.94	0.956	0.347426166968131	0.404626488657522
CUT256	8	4	8	66	26	24	28	39	46	7	4	7	76	30	24	28	32	45	28	6	43	35	6.161	2.623	1.23831596688931e-06	2.74279006616158e-06
CUT257	8	7	11	460	128	360	57	52	51	7	7	10	530	146	354	58	42	50	133.63	8	343	50	35.76	5.16	1.78531651767064e-33	2.12024479933933e-32
CUT258	4	5	3	62	27	51	6	17	12	3	5	3	71	31	50	6	14	12	21.67	4	51	11	11.494	3.523	3.83626972817889e-09	1.0277544255731e-08
CUT259	4	2	3	1	1	6	4	3	3	3	2	3	1	1	6	4	2	3	2.85	3	3	3	0.955	-0.066	0.935863784822844	0.948279215246662
CUT260	25	16	36	63	49	64	19	27	25	21	17	32	73	56	63	19	22	24	36.19	23	64	22	2.721	1.444	4.86415294565774e-05	9.43757119756872e-05
CUT261	2	2	3	33	20	43	4	5	5	2	2	3	38	23	42	4	4	5	13.6	2	34	4	12.631	3.659	3.11976108643581e-08	7.86909735723912e-08
CUT262	8	3	4	15	7	14	3	8	8	7	3	4	17	8	14	3	7	8	7.73	5	13	6	2.548	1.349	0.0368580398861536	0.0518568569840586
CUT263	29	22	25	274	132	183	32	34	31	24	23	22	316	150	180	32	28	30	89.42	23	215	30	8.706	3.122	1.47733355420216e-22	9.34205623073942e-22
CUT264	16	11	15	38	17	37	19	16	14	13	11	13	44	19	36	19	13	14	20.36	12	33	15	2.437	1.285	0.00273191651618	0.00444145470340561
CUT265	41	27	41	26	12	26	17	15	24	34	28	36	30	14	26	17	12	23	24.44	33	23	17	0.709	-0.496	0.188186629265672	0.232960693813416
CUT266	16	8	11	486	225	297	13	22	21	13	8	10	560	256	292	13	18	21	132.28	10	369	17	31.169	4.962	1.00385895707804e-37	1.52947793642946e-36
CUT267	3	6	8	26	41	103	19	20	27	2	6	7	30	47	101	19	16	26	28.38	5	59	20	9.707	3.279	8.3017272839662e-11	2.51006429600075e-10
CUT268	23	16	27	733	296	595	86	67	73	19	17	24	845	337	585	87	55	71	226.45	20	589	71	26.976	4.754	6.68511321670466e-55	2.36018830968008e-53
CUT269	3	3	3	4	3	1	2	2	2	2	3	3	5	3	1	2	2	2	2.54	3	3	2	1.017	0.025	0.975485773649335	0.979677445072716
CUT270	15	5	14	74	26	95	7	5	16	12	5	12	85	30	93	7	4	16	29.43	10	69	9	6.375	2.673	5.31583942776642e-10	1.51219327051797e-09
CUT271	1	0	1	19	2	6	1	1	4	1	0	1	22	2	6	1	1	4	4.17	1	10	2	7.473	2.902	0.00323993147571534	0.00521944295908595
CUT272	13	1	4	24	5	9	7	4	3	11	1	4	28	6	9	7	3	3	7.86	5	14	4	2.491	1.317	0.0400994706934472	0.0561133294843281
CUT273	14	9	14	22	23	32	6	2	8	12	9	12	25	26	31	6	2	8	14.63	11	27	5	2.361	1.24	0.0105782831105157	0.0160272029598711
CUT274	1	2	3	5	0	4	1	0	0	1	2	3	6	0	4	1	0	0	1.8	2	3	0	1.129	0.175	0.85577333864823	0.88172872821753
CUT275	7	4	8	35	6	24	11	9	14	6	4	7	40	7	24	11	7	14	13.31	6	24	11	3.419	1.774	0.00205633550659942	0.00338646233513541
CUT276	9	12	7	139	192	206	127	131	114	7	12	6	160	218	202	128	107	111	105.93	8	193	115	20.835	4.381	5.82942685317037e-31	6.03389567813542e-30
CUT277	1	1	1	1	0	0	0	0	0	1	1	1	1	0	0	0	0	0	0.43	1	0	0	0.733	-0.447	0.665894738057247	0.715266986045679
CUT278	16	19	27	72	38	114	26	30	25	13	20	24	83	43	112	26	24	24	41.11	19	79	25	3.927	1.973	6.22036169066156e-07	1.41065683518477e-06
CUT279	30	26	40	233	103	186	80	92	83	25	27	35	268	117	183	81	75	81	99.13	29	189	79	6.119	2.613	1.39758819018597e-15	5.8939789211524e-15
CUT280	20	14	26	4	2	6	5	6	8	17	15	23	5	2	6	5	5	8	9.38	18	4	6	0.265	-1.915	0.00178523793424683	0.0029629726600779
CUT281	28	29	22	168	66	67	646	522	724	23	30	19	194	75	66	653	425	708	243.57	24	112	595	4.068	2.024	1.59764216781538e-07	3.81566449480697e-07
CUT282	17	26	19	58	66	33	14	14	16	14	27	17	67	75	32	14	11	16	30.36	19	58	14	2.843	1.507	0.000337746841861558	0.000604334649210559
CUT283	18	13	13	285	83	126	25	29	27	15	14	11	328	94	124	25	24	26	73.52	13	182	25	11.507	3.524	1.89383892698096e-17	8.89525791828759e-17
CUT284	5	3	10	217	233	296	24	36	28	4	3	9	250	265	291	24	29	27	100.32	5	269	27	43.734	5.451	2.1623759224224e-37	3.21904777444944e-36
CUT285	20	14	19	6	3	8	15	21	13	17	15	17	7	3	8	15	17	13	12.32	16	6	15	0.416	-1.266	0.0202800532400619	0.0296648769762628
CUT286	11	11	9	1	2	3	3	10	7	9	11	8	1	2	3	3	8	7	5.87	9	2	6	0.274	-1.867	0.0142753929803219	0.0213082440117565
CUT287	23	15	26	40	56	35	22	22	17	19	16	23	46	64	34	22	18	17	28.7	19	48	19	2.352	1.234	0.00179359852382693	0.00297558096954025
CUT288	15	11	17	11	3	8	16	15	6	12	11	15	13	3	8	16	12	6	10.77	13	8	11	0.629	-0.67	0.232711702292855	0.2821904070763
CUT289	4	6	7	48	30	31	3	11	9	3	6	6	55	34	30	3	9	9	17.37	5	40	7	6.856	2.777	1.45903759290538e-06	3.21582672778051e-06
CUT290	8	11	14	13	6	13	12	3	9	7	11	12	15	7	13	12	2	9	9.81	10	12	8	1.06	0.084	0.881134147262969	0.904032804645747
CUT291	45	33	46	867	385	271	102	96	101	37	34	40	999	438	266	103	78	99	232.77	37	568	93	12.849	3.684	1.53117325094221e-23	1.03012611459474e-22
CUT292	11	15	26	166	33	59	15	22	23	9	16	23	191	38	58	15	18	22	43.31	16	96	18	4.839	2.275	2.61846511209719e-05	5.21284212946639e-05
CUT293	3	4	4	2	5	5	1	1	2	2	4	4	2	6	5	1	1	2	2.98	3	4	1	1.18	0.239	0.754156400216203	0.794211047570961
CUT294	1	10	12	2	1	3	7	7	8	1	10	11	2	1	3	7	6	8	5.41	7	2	7	0.414	-1.271	0.11584500819415	0.149686506607346
CUT295	23	10	10	4	10	18	13	24	21	19	10	9	5	11	18	13	20	21	13.9	13	11	18	0.858	-0.221	0.679698440400234	0.727910188280529
CUT296	2	4	2	9	4	10	7	7	3	2	4	2	10	5	10	7	6	3	5.34	3	8	5	2.788	1.479	0.0492803593785515	0.0679917685593568
CUT297	6	5	9	30	28	59	7	6	7	5	5	8	35	32	58	7	5	7	17.92	6	42	6	6.235	2.64	1.15186393814487e-07	2.77368266663115e-07
CUT298	19	26	22	36	31	45	54	57	60	16	27	19	41	35	44	55	46	59	38.07	21	40	53	1.902	0.927	0.00947109286529691	0.0144357886036076
CUT299	19	23	23	31	25	30	15	25	28	16	24	20	36	28	29	15	20	27	24.03	20	31	21	1.532	0.616	0.116838819172701	0.150887218571354
CUT300	3	3	4	14	12	12	3	5	4	2	3	4	16	14	12	3	4	4	6.85	3	14	4	3.886	1.958	0.00368377410147389	0.00590191721275348
CUT301	32	22	43	61	43	53	21	28	30	27	23	38	70	49	52	21	23	29	36.85	29	57	24	1.923	0.943	0.00630940155618428	0.00982038421359618
CUT302	0	0	0	0	0	0	0	0	0	0	0	0	0	0	0	0	0	0	0	0	0	0	1	0	NA	NA
CUT303	5	6	13	1	2	5	6	2	3	4	6	11	1	2	5	6	2	3	4.53	7	3	4	0.463	-1.11	0.152519975403082	0.192499020689105
CUT304	21	11	19	184	95	181	49	58	52	17	11	17	212	108	178	50	47	51	76.77	15	166	49	10.257	3.358	9.83761513098584e-24	6.71117165328082e-23
CUT305	15	12	20	12	5	10	13	11	11	12	12	18	14	6	10	13	9	11	11.62	14	10	11	0.708	-0.498	0.319885593256415	0.375545815028578
CUT306	175	112	174	52	33	48	123	105	123	145	117	152	60	38	47	124	85	120	98.7	138	48	110	0.352	-1.505	4.24960359571331e-09	1.1351055455887e-08
CUT307	5	5	3	1	1	1	0	4	3	4	5	3	1	1	1	0	3	3	2.38	4	1	2	0.395	-1.339	0.157759455333401	0.198426110755153
CUT308	5	5	7	3	9	12	7	7	7	4	5	6	3	10	12	7	6	7	6.73	5	8	7	1.478	0.564	0.361634333348595	0.419210278693748
CUT309	13	7	10	8	8	13	5	12	8	11	7	9	9	9	13	5	10	8	8.95	9	10	8	1.123	0.167	0.754834247959917	0.794720439648458
CUT310	6	8	7	16	7	24	8	12	8	5	8	6	18	8	24	8	10	8	10.56	6	17	9	2.315	1.211	0.0356590319817287	0.0503396288642766
CUT311	30	11	20	20	9	19	7	10	11	25	11	18	23	10	19	7	8	11	14.63	18	17	9	0.966	-0.05	0.910538474168661	0.92806495799379
CUT312	7	7	6	115	74	55	18	19	25	6	7	5	133	84	54	18	15	24	38.57	6	90	19	12.773	3.675	3.27507235192723e-14	1.25896366791519e-13
CUT313	9	5	5	4	5	5	10	13	5	7	5	4	5	6	5	10	11	5	6.42	5	5	9	0.925	-0.113	0.855429441899924	0.881529846388228
CUT314	7	5	8	10	11	9	3	3	3	6	5	7	12	13	9	3	2	3	6.59	6	11	3	1.667	0.737	0.215701441418094	0.263752960595569
CUT315	65	53	71	33	24	84	54	43	62	54	55	62	38	27	83	55	35	61	52.13	57	49	50	0.816	-0.294	0.379863355620147	0.438171099479884
CUT316	15	13	12	83	128	104	15	21	23	12	14	11	96	146	102	15	17	22	48.29	12	115	18	8.779	3.134	2.48129748647891e-17	1.15708070339156e-16
CUT317	9	9	16	12	4	11	2	6	7	7	9	14	14	5	11	2	5	7	8.2	10	10	5	0.964	-0.053	0.926843637910228	0.941588694481346
CUT318	3	3	6	17	6	13	4	3	4	2	3	5	20	7	13	4	2	4	6.72	3	13	3	3.007	1.588	0.0184269168474043	0.0271444535836085
CUT319	40	31	47	55	33	61	25	32	38	33	32	41	63	38	60	25	26	37	39.54	35	54	29	1.465	0.551	0.0857172847622544	0.113339238485144
CUT320	9	15	12	4	2	6	14	13	15	7	16	11	5	2	6	14	11	15	9.53	11	4	13	0.431	-1.213	0.0518517679087303	0.0711781698321887
CUT321	20	12	19	4	8	3	16	13	23	17	12	17	5	9	3	16	11	22	12.4	15	6	16	0.403	-1.31	0.0253259808566842	0.0365517367285676
CUT322	27	24	23	6	4	5	21	22	29	22	25	20	7	5	5	21	18	28	16.81	22	6	22	0.263	-1.925	0.000316090823994927	0.00056706130936517
CUT323	2	5	1	20	12	22	2	5	2	2	5	1	23	14	22	2	4	2	8.23	3	20	3	6.702	2.745	0.000213385475620856	0.00038926360725965
CUT324	9	5	7	8	4	10	4	4	3	7	5	6	9	5	10	4	3	3	5.85	6	8	3	1.196	0.258	0.670411868465356	0.719679689039698
CUT325	4	3	5	2	2	2	3	2	0	3	3	4	2	2	2	3	2	0	2.45	3	2	2	0.68	-0.555	0.514374169714791	0.571378619261687
CUT326	4	3	4	33	35	23	5	11	9	3	3	4	38	40	23	5	9	9	14.8	3	34	8	8.41	3.072	2.46060404495651e-07	5.78796676114368e-07
CUT327	9	5	9	8	4	14	1	4	4	7	5	8	9	5	14	1	3	4	6.25	7	9	3	1.23	0.298	0.626303863286226	0.678988620535908
CUT328	18	18	14	196	88	193	38	43	34	15	19	12	226	100	190	38	35	33	74.23	15	172	35	10.314	3.367	5.40359133478591e-19	2.77444500607681e-18
CUT329	0	4	1	3	0	2	3	3	4	0	4	1	3	0	2	3	2	4	2.2	2	2	3	1.138	0.186	0.846478865212667	0.874001768764378
CUT330	24	32	26	214	39	139	69	78	60	20	33	23	247	44	137	70	63	59	77.26	25	143	64	4.697	2.232	2.34475994793273e-06	5.09404438586018e-06
CUT331	1	3	7	18	13	17	4	10	4	1	3	6	21	15	17	4	8	4	8.71	3	18	5	4.613	2.206	0.00145796453053194	0.00244619863658238
CUT332	8	7	6	16	5	7	9	5	2	7	7	5	18	6	7	9	4	2	7.25	6	10	5	1.374	0.459	0.445997190133751	0.505178168450423
CUT333	2	1	1	1	0	1	0	0	0	2	1	1	1	0	1	0	0	0	0.63	1	1	0	0.77	-0.377	0.723996322461132	0.767472879561029
CUT334	8	5	6	37	26	34	18	12	11	7	5	5	43	30	33	18	10	11	17.93	6	35	13	5.684	2.507	4.20561178964582e-07	9.70896471232735e-07
CUT335	2	3	3	2	0	1	0	1	3	2	3	3	2	0	1	0	1	3	1.6	3	1	1	0.585	-0.774	0.434920497809608	0.494356671277413
CUT336	8	6	5	26	16	53	3	3	8	7	6	4	30	18	52	3	2	8	14.53	6	33	4	4.793	2.261	5.57144194802699e-05	0.000107367860495784
CUT337	20	27	24	58	78	75	20	30	19	17	28	21	67	89	74	20	24	19	39.79	22	77	21	3.429	1.778	8.62897603441524e-08	2.09904691794705e-07
CUT338	3	0	0	0	0	0	0	0	0	2	0	0	0	0	0	0	0	0	0.28	1	0	0	0.804	-0.314	0.7357326092154	NA
CUT339	0	3	3	5	3	6	1	3	0	0	3	3	6	3	6	1	2	0	2.7	2	5	1	2.328	1.219	0.18345617256897	0.227538615224048
CUT340	7	9	12	40	20	22	18	14	12	6	9	11	46	23	22	18	11	12	17.49	9	30	14	3.113	1.638	0.00109996889728935	0.00186807681059778
CUT341	24	7	19	13	7	18	40	36	36	20	7	17	15	8	18	40	29	35	21.03	15	14	35	0.945	-0.081	0.850953094944743	0.8777019459664
CUT342	3	3	4	3	1	4	0	1	2	2	3	4	3	1	4	0	1	2	2.27	3	3	1	0.93	-0.104	0.901804296050081	0.920472093950672
CUT343	0	2	0	7	5	4	1	2	2	0	2	0	8	6	4	1	2	2	2.71	1	6	2	5.269	2.398	0.0195607814998714	0.0286989695677963
CUT344	17	11	14	69	39	70	16	16	16	14	11	12	80	44	69	16	13	16	30.58	12	64	15	4.809	2.266	5.00466008224385e-09	1.33191659578915e-08
CUT345	14	10	14	58	29	45	11	14	12	12	10	12	67	33	44	11	11	12	23.61	11	48	11	3.903	1.965	4.71994035255977e-06	1.00049379575573e-05
CUT346	10	11	13	491	375	328	23	18	37	8	11	11	566	426	322	23	15	36	157.75	10	438	25	37.857	5.243	2.66242508436503e-38	4.15395187395057e-37
CUT347	1	2	2	4	0	4	1	1	0	1	2	2	5	0	4	1	1	0	1.67	2	3	1	1.366	0.45	0.639838267757564	0.691560303090538
CUT348	1	1	1	0	0	0	0	0	0	1	1	1	0	0	0	0	0	0	0.3	1	0	0	0.695	-0.524	0.578324264407685	NA
CUT349	2	5	7	0	1	0	3	5	6	2	5	6	0	1	0	3	4	6	3.01	4	0	4	0.207	-2.274	0.0277610808926776	0.0398545443872028
CUT350	22	18	37	4	9	12	6	21	19	18	19	32	5	10	12	6	17	19	15.3	23	9	14	0.398	-1.33	0.00821347983799651	0.0125928529764927
CUT351	2	1	0	1	2	6	1	1	1	2	1	0	1	2	6	1	1	1	1.65	1	3	1	2.193	1.133	0.252937826149481	0.304567896587619
CUT352	3	2	4	5	0	9	15	14	17	2	2	4	6	0	9	15	11	17	7.32	3	5	14	1.483	0.569	0.428358338787854	0.487894302833808
CUT353	69	43	74	218	87	178	73	121	76	57	45	65	251	99	175	74	98	74	104.25	56	175	82	2.972	1.571	4.86351509987844e-06	1.02999342981478e-05
CUT354	10	12	16	84	34	42	10	8	11	8	12	14	97	39	41	10	7	11	26.54	11	59	9	4.445	2.152	6.23958200210909e-06	1.30790592424479e-05
CUT355	30	20	28	165	210	383	99	121	111	25	21	25	190	239	376	100	98	108	131.39	24	268	102	10.699	3.419	2.29798259141129e-29	2.16217589075945e-28
CUT356	7	1	5	1	0	2	2	2	4	6	1	4	1	0	2	2	2	4	2.43	4	1	3	0.402	-1.314	0.164407412252987	0.205879234846593
CUT357	9	0	10	19	22	24	6	2	11	7	0	9	22	25	24	6	2	11	11.68	5	24	6	4.693	2.23	0.000947794078977756	0.00162023429007227
CUT358	5	2	6	5	6	9	10	5	3	4	2	5	6	7	9	10	4	3	5.56	4	7	6	1.718	0.781	0.25803837828961	0.309847563572994
CUT359	16	12	17	156	191	214	36	28	19	13	12	15	180	217	210	36	23	19	80.63	13	202	26	14.058	3.813	6.09135247117826e-27	4.98135374235054e-26
CUT360	1	0	1	4	0	0	0	0	0	1	0	1	5	0	0	0	0	0	0.7	1	2	0	1.109	0.149	0.886014772186635	0.907765090984834
CUT361	5	3	1	4	2	4	3	5	5	4	3	1	5	2	4	3	4	5	3.44	3	4	4	1.265	0.339	0.66405064925426	0.713768937379073
CUT362	9	10	7	0	0	6	7	5	5	7	10	6	0	0	6	7	4	5	5.1	8	2	5	0.281	-1.832	0.0374254524181899	0.0526045028817617
CUT363	7	4	4	3	5	8	5	3	3	6	4	4	3	6	8	5	2	3	4.54	5	6	3	1.226	0.293	0.667877269433154	0.717222364509818
CUT364	1	0	0	0	3	0	2	3	0	1	0	0	0	3	0	2	2	0	0.97	0	1	1	1.365	0.448	0.674330308310866	0.722956328708328
CUT365	9	4	5	6	2	8	10	9	12	7	4	4	7	2	8	10	7	12	6.91	5	6	10	1.03	0.043	0.944878892067366	0.955426121791511
CUT366	12	8	8	71	40	82	16	20	21	10	8	7	82	45	81	16	16	21	31.79	8	69	18	7.536	2.914	9.97994199142764e-12	3.23152125552295e-11
CUT367	3	5	2	39	16	22	9	16	4	2	5	2	45	18	22	9	13	4	13.36	3	28	9	7.738	2.952	7.30497908139356e-06	1.5227610693037e-05
CUT368	69	40	70	317	197	395	71	60	77	57	42	61	365	224	388	72	49	75	148.15	53	326	65	5.944	2.571	1.05025805824103e-28	9.44101205277285e-28
CUT369	19	14	16	32	18	26	14	18	12	16	15	14	37	20	26	14	15	12	18.64	15	28	14	1.766	0.821	0.0503410304092196	0.0692997150856567
CUT370	3	3	3	2	1	7	0	2	2	2	3	3	2	1	7	0	2	2	2.46	3	3	1	1.062	0.087	0.91769966930786	0.934085736044913
CUT371	4	0	2	11	3	3	4	1	2	3	0	2	13	3	3	4	1	2	3.43	2	6	2	2.866	1.519	0.079745376426494	0.106199939478064
CUT372	12	9	6	10	5	5	9	8	10	10	9	5	12	6	5	9	7	10	8.01	8	8	9	0.9	-0.151	0.791526109192106	0.826906321474965
CUT373	12	14	17	23	8	36	10	9	13	10	15	15	27	9	35	10	7	13	15.61	13	24	10	1.591	0.669	0.165419315875399	0.207035463780649
CUT374	0	0	3	1	1	2	3	3	0	0	0	3	1	1	2	3	2	0	1.37	1	1	2	1.469	0.555	0.597081649696943	0.650825124368853
CUT375	25	12	12	73	39	32	18	22	40	21	12	11	84	44	31	18	18	39	30.98	15	53	25	3.361	1.749	0.000298305967001783	0.000537051845691394
CUT376	16	13	17	574	226	319	46	67	60	13	14	15	661	257	313	46	55	59	159.25	14	410	53	25.652	4.681	6.49347762537681e-34	7.97926178024746e-33
CUT377	38	40	35	532	283	449	115	130	115	31	42	31	613	322	441	116	106	112	201.58	35	459	111	12.508	3.645	7.27801370189468e-35	9.46060824475431e-34
CUT378	34	19	24	114	68	83	41	58	44	28	20	21	131	77	82	41	47	43	54.54	23	97	44	4.032	2.011	1.16867048383543e-09	3.25789200240956e-09
CUT379	16	7	11	4	11	14	8	17	16	13	7	10	5	13	14	8	14	16	10.96	10	11	13	0.966	-0.05	0.925793774990824	0.940767483003719
CUT380	0	1	0	2	0	1	0	0	1	0	1	0	2	0	1	0	0	1	0.59	0	1	0	1.549	0.631	0.550092864255691	0.605537416323663
CUT381	1	4	2	5	2	2	0	3	3	1	4	2	6	2	2	0	2	3	2.46	2	3	2	1.499	0.584	0.511504849265581	0.568630676228841
CUT382	5	7	6	4	4	1	3	6	1	4	7	5	5	5	1	3	5	1	3.97	5	4	3	0.622	-0.685	0.360235236410199	0.417837118877378
CUT383	55	48	54	136	112	217	41	44	48	46	50	47	157	127	213	41	36	47	84.92	48	166	41	3.364	1.75	1.89749403502741e-10	5.56439530572907e-10
CUT384	1	3	1	2	0	0	1	0	6	1	3	1	2	0	0	1	0	6	1.56	2	1	2	0.583	-0.778	0.461284473096079	0.519873695882031
CUT385	11	10	16	176	45	96	23	16	27	9	10	14	203	51	94	23	13	26	49.39	11	116	21	8.622	3.108	3.34977905524852e-12	1.1139874228695e-11
CUT386	14	9	11	10	6	11	11	11	9	12	9	10	12	7	11	11	9	9	9.85	10	10	10	0.957	-0.064	0.900390034709127	0.91951043831258
CUT387	19	12	12	4	6	7	13	6	10	16	12	11	5	7	7	13	5	10	9.43	13	6	9	0.529	-0.919	0.11045428822538	0.143291386789719
CUT388	3	0	1	11	2	4	5	6	12	2	0	1	13	2	4	5	5	12	4.88	1	6	7	3.72	1.895	0.0365167413153008	0.0514138119289886
CUT389	36	23	39	182	67	106	18	28	30	30	24	34	210	76	104	18	23	29	60.92	29	130	23	4.076	2.027	1.31764356759584e-07	3.16115432784336e-07
CUT390	12	13	6	31	16	31	14	10	16	10	14	5	36	18	30	14	8	16	16.78	10	28	13	2.684	1.424	0.0051679264414392	0.00812760064136114
CUT391	8	3	0	6	6	18	15	18	17	7	3	0	7	7	18	15	15	17	9.73	3	11	16	2.774	1.472	0.0419765728841692	0.0585577451025906
CUT392	6	6	7	239	132	121	14	8	17	5	6	6	275	150	119	14	7	17	66.56	6	181	13	26.323	4.718	2.91821358410471e-23	1.92559254341319e-22
CUT393	2	1	1	2	1	4	2	2	1	2	1	1	2	1	4	2	2	1	1.73	1	2	2	1.638	0.712	0.44494824863935	0.504234409774965
CUT394	6	3	8	12	10	26	3	5	4	5	3	7	14	11	26	3	4	4	8.54	5	17	4	2.946	1.559	0.00957097807481754	0.0145823272206412
CUT395	69	56	47	272	155	205	178	238	204	57	58	41	313	176	201	180	194	199	157.85	52	230	191	4.273	2.095	1.41567539072205e-13	5.19748118629527e-13
CUT396	3	7	12	16	3	20	4	5	9	2	7	11	18	3	20	4	4	9	8.74	7	14	6	1.796	0.845	0.183280551427617	0.227369057747679
CUT397	0	0	1	10	7	12	1	0	1	0	0	1	12	8	12	1	0	1	3.79	0	11	1	11.882	3.571	0.000617429332166044	0.00107706809608783
CUT398	25	18	14	8	18	18	15	14	14	21	19	12	9	20	18	15	11	14	15.48	17	16	13	0.928	-0.107	0.816112771488175	0.848722421252186
CUT399	6	4	7	3	5	2	5	2	4	5	4	6	3	6	2	5	2	4	4.11	5	4	4	0.779	-0.361	0.618683836363531	0.671615356409124
CUT400	21	20	20	40	29	41	13	12	24	17	21	18	46	33	40	13	10	23	24.6	19	40	15	2.033	1.023	0.0122385987053958	0.0184019897672743
CUT401	6	2	4	10	7	13	3	1	4	5	2	4	12	8	13	3	1	4	5.62	4	11	3	2.685	1.425	0.0391014231288003	0.0548085919015426
CUT402	61	51	57	118	154	279	171	208	173	51	53	50	136	175	274	173	169	169	138.88	51	195	170	3.643	1.865	8.3949899818639e-11	2.53563848353739e-10
CUT403	54	30	44	77	47	51	97	66	96	45	31	39	89	53	50	98	54	94	61.37	38	64	82	1.622	0.698	0.0219392710437526	0.0319638849790915
CUT404	11	20	20	71	84	86	42	49	38	9	21	18	82	96	85	42	40	37	47.64	16	88	40	5.402	2.434	1.00292933786969e-11	3.24660172918151e-11
CUT405	17	16	21	29	17	25	22	23	24	14	17	18	33	19	25	22	19	23	21.2	16	26	21	1.504	0.589	0.144020951877978	0.182640134958877
CUT406	22	15	29	217	241	207	35	53	44	18	16	25	250	274	203	35	43	43	100.92	20	242	40	11.653	3.543	7.20574679747478e-29	6.54792823291527e-28
CUT407	19	14	21	200	79	132	10	18	18	16	15	18	230	90	130	10	15	18	60.12	16	150	14	8.337	3.06	3.87499843691367e-14	1.48081202530324e-13
CUT408	52	29	47	205	123	160	94	121	90	43	30	41	236	140	157	95	98	88	103.24	38	178	94	4.493	2.168	1.68877603737477e-14	6.64703158395471e-14
CUT409	7	6	10	32	11	28	7	5	7	6	6	9	37	13	28	7	4	7	12.85	7	26	6	3.241	1.696	0.00158064719711776	0.00263953174414378
CUT410	14	10	12	79	53	79	15	15	18	12	10	11	91	60	78	15	12	18	34.04	11	76	15	6.633	2.73	1.88218476285229e-12	6.38653052807544e-12
CUT411	10	10	12	7	4	2	5	8	6	8	10	11	8	5	2	5	7	6	6.8	10	5	6	0.534	-0.905	0.158991306514582	0.199781979347248
CUT412	2	4	2	20	12	26	5	2	4	2	4	2	23	14	26	5	2	4	8.93	3	21	4	6.574	2.717	0.000106391472446299	0.000200030924863781
CUT413	40	34	42	43	68	48	31	35	40	33	35	37	50	77	47	31	28	39	42.02	35	58	33	1.591	0.67	0.0435498885124252	0.0605501483826534
CUT414	4	3	4	10	1	0	1	0	3	3	3	4	12	1	0	1	0	3	2.95	3	4	1	0.871	-0.199	0.827820804761704	0.858606010867602
CUT415	11	11	14	41	14	41	8	13	16	9	11	12	47	16	40	8	11	16	18.95	11	34	12	2.842	1.507	0.00221966329762752	0.00364362765782767
CUT416	8	4	5	14	9	7	1	5	3	7	4	4	16	10	7	1	4	3	6.27	5	11	3	1.9	0.926	0.153429828263897	0.193459319496321
CUT417	9	9	10	3	3	10	9	16	10	7	9	9	3	3	10	9	13	10	8.24	8	5	11	0.686	-0.544	0.363611523943933	0.421126290268464
CUT418	0	1	1	1	1	2	0	2	3	0	1	1	1	1	2	0	2	3	1.19	1	1	2	1.7	0.766	0.457314803159779	0.516345970021756
CUT419	12	8	11	58	28	33	5	5	6	10	8	10	67	32	32	5	4	6	19.33	9	44	5	4.226	2.079	1.15379457520614e-05	2.36922217639412e-05
CUT420	8	6	4	70	56	52	8	5	3	7	6	4	81	64	51	8	4	3	25.21	6	65	5	10.86	3.441	1.48646837934219e-12	5.07771689008852e-12
CUT421	15	10	28	22	28	20	10	12	13	12	10	25	25	32	20	10	10	13	17.42	16	26	11	1.594	0.672	0.14345528630336	0.182021550026175
CUT422	23	17	28	10	6	18	24	19	15	19	18	25	12	7	18	24	15	15	16.85	21	12	18	0.611	-0.71	0.127720042332415	0.163942927800593
CUT423	19	9	13	59	15	52	25	20	17	16	9	11	68	17	51	25	16	17	25.64	12	45	19	3.331	1.736	9.75130472591848e-05	0.000183855674454797
CUT424	28	39	50	87	22	42	20	30	27	23	41	44	100	25	41	20	24	26	38.34	36	55	23	1.39	0.475	0.296231566242672	0.350735773364931
CUT425	5	2	5	93	28	57	32	29	27	4	2	4	107	32	56	32	24	26	31.99	3	65	27	14.821	3.89	5.0662831277945e-13	1.78219700877202e-12
CUT426	15	5	10	566	171	339	85	100	86	12	5	9	652	194	333	86	81	84	161.94	9	393	84	37.577	5.232	1.36733508179181e-37	2.05645788491881e-36
CUT427	5	2	5	29	18	27	6	3	6	4	2	4	33	20	27	6	2	6	11.71	3	27	5	6.641	2.731	5.3136906015959e-06	1.12025596915478e-05
CUT428	4	1	5	15	17	41	6	9	10	3	1	4	17	19	40	6	7	10	12.09	3	25	8	7.166	2.841	6.42297869936712e-06	1.34538320632379e-05
CUT429	11	3	7	32	21	21	6	6	11	9	3	6	37	24	21	6	5	11	13.49	6	27	7	4.09	2.032	0.000252290326387437	0.000456387732842661
CUT430	8	8	6	18	5	12	10	5	9	7	8	5	21	6	12	10	4	9	9.04	7	13	8	1.61	0.687	0.234648851813604	0.284244478313857
CUT431	24	8	13	80	30	60	20	39	23	20	8	11	92	34	59	20	32	22	33.25	13	62	25	4.325	2.113	3.67383754077231e-06	7.86020972198192e-06
CUT432	58	51	49	879	269	383	63	64	52	48	53	43	1013	306	376	64	52	51	222.86	48	565	56	9.977	3.319	9.99991691429164e-22	6.02366129177382e-21
CUT433	9	3	6	2	2	1	2	1	4	7	3	5	2	2	1	2	1	4	3.13	5	2	2	0.462	-1.114	0.185409160173786	0.229790162879507
CUT434	8	4	15	50	18	28	12	11	16	7	4	13	58	20	28	12	9	16	18.47	8	35	12	4.04	2.014	0.000125900229389294	0.000234764653046639
CUT435	15	12	17	255	83	149	41	37	51	12	12	15	294	94	146	41	30	50	77.31	13	178	40	11.66	3.543	3.59012087834158e-19	1.86214614222369e-18
CUT436	1	0	2	2	0	0	1	4	0	1	0	2	2	0	0	1	3	0	1.02	1	1	1	0.779	-0.361	0.734746308927366	0.777157344098654
CUT437	1	3	2	2	5	2	0	4	2	1	3	2	2	6	2	0	3	2	2.32	2	3	2	1.521	0.605	0.488739441961824	0.546494031075101
CUT438	23	11	21	25	13	33	17	15	19	19	11	18	29	15	32	17	12	19	19.21	16	25	16	1.479	0.565	0.161765950596609	0.202875820849106
CUT439	9	6	13	13	24	54	18	11	16	7	6	11	15	27	53	18	9	16	18.13	8	32	14	3.389	1.761	0.000710982286085307	0.0012308946659545
CUT440	2	1	1	1	1	1	2	3	1	2	1	1	1	1	1	2	2	1	1.36	1	1	2	0.955	-0.067	0.945346621559573	0.955733248511564
CUT441	25	10	10	71	29	88	16	19	11	21	10	9	82	33	86	16	15	11	31.5	13	67	14	4.738	2.244	9.40910447383288e-07	2.102386135396e-06
CUT442	2	5	10	51	14	27	19	12	9	2	5	9	59	16	27	19	10	9	17.18	5	34	13	5.012	2.325	0.000165974615657661	0.000306120479573142
CUT443	3	2	1	11	2	5	4	3	3	2	2	1	13	2	5	4	2	3	3.86	2	7	3	2.644	1.403	0.0868245570517187	0.114673572977666
CUT444	1	2	7	4	0	2	1	5	1	1	2	6	5	0	2	1	4	1	2.41	3	2	2	0.85	-0.234	0.800915534522184	0.835818801252566
CUT445	27	18	32	201	102	205	165	229	201	22	19	28	232	116	201	167	186	196	129.74	23	183	183	7.54	2.915	4.85467152099989e-20	2.6559780615358e-19
CUT446	17	13	7	0	3	1	4	17	6	14	14	6	0	3	1	4	14	6	6.87	11	1	8	0.165	-2.597	0.00224991193728441	0.00369068934574756
CUT447	16	8	10	3	5	9	16	15	8	13	8	9	3	6	9	16	12	8	9.39	10	6	12	0.659	-0.601	0.301878392009026	0.356698775431494
CUT448	2	1	1	15	3	6	2	2	2	2	1	1	17	3	6	2	2	2	3.97	1	9	2	4.644	2.215	0.0122601008873161	0.0184319489218032
CUT449	19	26	22	26	9	20	10	14	11	16	27	19	30	10	20	10	11	11	17.13	21	20	11	0.957	-0.063	0.891910457577328	0.912605341673116
CUT450	2	1	3	10	24	15	1	1	1	2	1	3	12	27	15	1	1	1	6.85	2	18	1	7.085	2.825	0.000241479046587672	0.000437914981133385
CUT451	37	27	25	263	238	263	60	87	95	31	28	22	303	271	258	61	71	93	126.34	27	277	75	9.937	3.313	1.74570774770237e-29	1.65184945260323e-28
CUT452	90	62	73	563	508	356	83	99	80	75	65	64	649	578	350	84	81	78	224.65	68	526	81	7.413	2.89	1.88091192296647e-30	1.88834508005036e-29
CUT453	51	37	54	178	64	103	54	38	56	42	39	47	205	73	101	55	31	55	71.93	43	126	47	2.678	1.421	2.21258645477581e-05	4.42896288292397e-05
CUT454	12	8	6	6	1	6	7	10	14	10	8	5	7	1	6	7	8	14	7.37	8	5	10	0.621	-0.688	0.29402466147234	0.348369886846372
CUT455	2	4	7	4	2	2	2	5	1	2	4	6	5	2	2	2	4	1	3.1	4	3	2	0.807	-0.31	0.700335352285997	0.746521839534267
CUT456	21	14	13	18	18	21	17	19	14	17	15	11	21	20	21	17	15	14	16.83	14	21	15	1.394	0.479	0.254058953567389	0.305634438067584
CUT457	2	0	5	1	2	0	1	2	4	2	0	4	1	2	0	1	2	4	1.78	2	1	2	0.815	-0.296	0.76402571101303	0.802553209788608
CUT458	4	9	6	1	0	3	6	6	3	3	9	5	1	0	3	6	5	3	3.99	6	1	5	0.334	-1.584	0.0725924394720508	0.0973285047809071
CUT459	23	11	14	49	43	141	46	72	66	19	11	12	56	49	139	46	59	65	50.69	14	81	57	4.958	2.31	6.16476570759127e-08	1.51787068772513e-07
CUT460	27	18	26	26	20	49	25	26	28	22	19	23	30	23	48	25	21	27	26.5	21	34	24	1.497	0.582	0.115684926905393	0.149512724598144
CUT461	14	14	20	9	3	12	5	9	9	12	15	18	10	3	12	5	7	9	10.05	15	8	7	0.617	-0.697	0.199808694393733	0.24581160150386
CUT462	7	5	7	9	8	7	5	4	2	6	5	6	10	9	7	5	3	2	5.97	6	9	3	1.411	0.497	0.415728283460941	0.475083191915172
CUT463	1	1	0	9	14	7	1	0	4	1	1	0	10	16	7	1	0	4	4.44	1	11	2	8.318	3.056	0.00257502910182283	0.00419748780637489
CUT464	16	20	16	301	248	85	26	31	31	13	21	14	347	282	84	26	25	30	93.59	16	238	27	12.462	3.64	1.74090847079289e-16	7.7442924970254e-16
CUT465	24	21	33	245	105	267	28	32	43	20	22	29	282	119	262	28	26	42	92.34	24	221	32	8.703	3.121	2.0349084880619e-20	1.13183915237941e-19
CUT466	2	2	1	1	3	5	7	4	4	2	2	1	1	3	5	7	3	4	3.15	2	3	5	1.726	0.788	0.357723399781294	0.415253367422688
CUT467	27	10	19	7	7	11	7	7	9	22	10	17	8	8	11	7	6	9	10.87	16	9	7	0.591	-0.758	0.140244536183438	0.178296088972982
CUT468	31	21	38	37	16	51	22	19	22	26	22	33	43	18	50	22	15	22	27.88	27	37	20	1.297	0.375	0.302566363059056	0.35740326682585
CUT469	7	12	20	17	16	13	10	8	9	6	12	18	20	18	13	10	7	9	12.42	12	17	9	1.382	0.466	0.364136935657573	0.421651231678002
CUT470	9	12	22	38	15	33	19	11	28	7	12	19	44	17	32	19	9	27	20.89	13	31	18	2.203	1.139	0.0171433592391273	0.025352732987654
CUT471	10	5	5	25	10	18	6	6	7	8	5	4	29	11	18	6	5	7	10.39	6	19	6	2.885	1.529	0.00656868895014043	0.010202246022241
CUT472	2	5	2	9	2	4	6	3	6	2	5	2	10	2	4	6	2	6	4.39	3	5	5	1.546	0.628	0.414101013763213	0.473594093446555
CUT473	30	21	34	238	147	269	24	31	24	25	22	30	274	167	264	24	25	23	95.02	26	235	24	8.811	3.139	1.06669647756791e-25	8.19015442631973e-25
CUT474	22	23	17	71	55	96	44	43	42	18	24	15	82	63	94	44	35	41	46.25	19	80	40	4.042	2.015	1.35141897256987e-08	3.49009549468543e-08
CUT475	12	5	13	22	9	14	10	6	12	10	5	11	25	10	14	10	5	12	11.4	9	16	9	1.725	0.786	0.125908538026266	0.161759803801115
CUT476	18	19	27	101	33	111	25	20	29	15	20	24	116	38	109	25	16	28	43.46	20	88	23	4.018	2.006	6.146324584967e-07	1.39522045648649e-06
CUT477	8	4	13	21	12	16	9	13	10	7	4	11	24	14	16	9	11	10	11.69	7	18	10	2.234	1.16	0.0322931871738209	0.0458985873647861
CUT478	5	5	7	32	9	20	7	11	9	4	5	6	37	10	20	7	9	9	11.89	5	22	8	3.645	1.866	0.00192816599675074	0.00318751560871822
CUT479	29	22	38	88	46	126	108	111	115	24	23	33	101	52	124	109	90	112	74.39	27	92	104	3.295	1.72	5.88905051394323e-08	1.45127465849727e-07
CUT480	65	45	50	299	385	652	326	413	423	54	47	44	345	438	641	329	336	413	294.05	48	475	359	9.282	3.214	1.85034672726379e-33	2.19524384312738e-32
CUT481	5	2	9	0	0	0	2	5	6	4	2	8	0	0	0	2	4	6	2.89	5	0	4	0.122	-3.036	0.00428997646290614	0.00682355586573039
CUT482	16	7	13	178	43	100	13	21	14	13	7	11	205	49	98	13	17	14	47.57	10	117	15	9.243	3.208	4.05431712657341e-12	1.34141421124397e-11
CUT483	94	64	81	202	93	145	109	141	130	78	67	71	233	106	142	110	115	127	116.48	72	160	117	2.123	1.086	0.000166319853401699	0.000306660430238602
CUT484	782	762	985	393	576	461	555	576	579	648	793	862	453	655	453	561	469	566	606.57	768	520	532	0.685	-0.546	0.0157323190762383	0.02334872754952
CUT485	13	10	28	59	35	40	10	7	6	11	10	25	68	40	39	10	6	6	23.83	15	49	7	3.025	1.597	0.000580434327854231	0.00101480484070984
CUT486	1	3	1	5	4	11	4	5	7	1	3	1	6	5	11	4	4	7	4.54	2	7	5	3.378	1.756	0.0331822712034837	0.0470763653373693
CUT487	13	7	12	5	5	12	9	12	7	11	7	11	6	6	12	9	10	7	8.61	10	8	9	0.835	-0.26	0.641789100200124	0.693284102878411
CUT488	4	0	4	4	0	2	4	3	1	3	0	4	5	0	2	4	2	1	2.32	2	2	2	0.924	-0.114	0.902803477142202	0.921331013351129
CUT489	18	9	11	22	13	13	4	11	12	15	9	10	25	15	13	4	9	12	12.39	11	18	8	1.462	0.548	0.291179986470585	0.34531452424348
CUT490	7	8	11	15	23	43	13	15	11	6	8	10	17	26	42	13	12	11	16.17	8	28	12	3.293	1.719	0.000602325814593707	0.00105166285213537
CUT491	22	10	27	71	27	77	23	18	19	18	10	24	82	31	76	23	15	19	32.99	17	63	19	3.385	1.759	3.87893367304097e-06	8.28536262167004e-06
CUT492	17	6	16	62	55	72	16	15	13	14	6	14	71	63	71	16	12	13	31.13	11	68	14	5.706	2.512	3.10434780664249e-10	8.98177976440311e-10
CUT493	5	3	6	295	71	172	43	55	34	4	3	5	340	81	169	43	45	33	80.4	4	197	40	35.095	5.133	3.77152386365494e-22	2.33690497723604e-21
CUT494	28	23	34	382	99	142	42	45	44	23	24	30	440	113	140	42	37	43	99.03	26	231	41	7.333	2.874	4.10927829167004e-12	1.35882926192575e-11
CUT495	140	80	110	273	263	438	129	90	123	116	83	96	315	299	430	130	73	120	184.82	98	348	108	3.483	1.8	3.5028077679829e-13	1.24946996479963e-12
CUT496	753	417	552	456	543	625	369	405	338	624	434	483	525	618	614	373	330	330	481.19	514	586	344	1.147	0.197	0.340435950393473	0.397079001526912
CUT497	5	2	0	7	5	5	0	1	4	4	2	0	8	6	5	0	1	4	3.29	2	6	2	2.256	1.174	0.195527912520583	0.241078200645234
CUT498	8	7	8	13	4	6	8	12	9	7	7	7	15	5	6	8	10	9	8.11	7	9	9	1.128	0.174	0.765223120509641	0.803666521638866
CUT499	23	13	26	215	142	200	29	22	30	19	14	23	248	161	197	29	18	29	81.96	19	202	25	10.519	3.395	9.19939899358945e-28	7.86999828983062e-27
CUT500	5	9	8	238	78	98	15	29	21	4	9	7	274	89	96	15	24	21	59.89	7	153	20	17.979	4.168	1.95656715065441e-15	8.16587275805267e-15
CUT501	23	13	27	71	29	63	33	24	38	19	14	24	82	33	62	33	20	37	35.88	19	59	30	2.972	1.571	1.42735080605969e-05	2.90846059627089e-05
CUT502	11	8	6	951	241	483	15	15	18	9	8	5	1096	274	475	15	12	18	212.47	7	615	15	63.022	5.978	1.86659668343681e-41	3.4082888816629e-40
CUT503	69	39	62	125	183	266	41	53	55	57	41	54	144	208	261	41	43	54	100.43	51	204	46	3.867	1.951	9.2759249991517e-12	3.00772640233315e-11
CUT504	44	31	36	144	107	118	59	69	57	36	32	32	166	122	116	60	56	56	75.03	33	135	57	3.917	1.97	1.08341145766386e-12	3.73583543648861e-12
CUT505	2	1	3	4	3	13	5	3	7	2	1	3	5	3	13	5	2	7	4.49	2	7	5	2.942	1.557	0.0514353087639125	0.0706703506441873
CUT506	51	35	48	861	352	372	91	102	89	42	36	42	992	400	366	92	83	87	237.85	40	586	87	12.798	3.678	1.7117991054578e-29	1.62239126896835e-28
CUT507	32	16	37	24	16	15	46	43	45	27	17	32	28	18	15	46	35	44	29.06	25	20	42	0.816	-0.293	0.444547154223395	0.503877598860775
CUT508	7	2	6	1	3	10	11	19	18	6	2	5	1	3	10	11	15	18	7.97	4	5	15	0.991	-0.013	0.984124063161702	0.986487716770256
CUT509	178	128	179	789	730	387	154	209	173	147	133	157	909	830	380	156	170	169	339.08	146	706	165	4.54	2.183	7.68765405148586e-13	2.676137183368e-12
CUT510	5	4	2	12	12	13	6	10	6	4	4	2	14	14	13	6	8	6	7.82	3	14	7	3.558	1.831	0.0047662352831456	0.00753595258000805
CUT511	5	5	6	9	7	17	9	12	11	4	5	5	10	8	17	9	10	11	8.8	5	12	10	2.148	1.103	0.0601959190024636	0.0817774365801895
CUT512	1	3	0	1	0	3	4	4	3	1	3	0	1	0	3	4	3	3	2.03	1	1	3	1.111	0.152	0.875968848743839	0.899364959270823
CUT513	5	2	6	1	0	1	0	3	1	4	2	5	1	0	1	0	2	1	1.89	4	1	1	0.339	-1.56	0.129042337948452	0.165512980053299
CUT514	2	1	1	11	3	3	3	1	3	2	1	1	13	3	3	3	1	3	3.26	1	6	2	3.382	1.758	0.0506024499346151	0.0696103861019319
CUT515	79	54	65	35	29	37	64	51	47	65	56	57	40	33	36	65	42	46	48.92	59	36	51	0.628	-0.67	0.0239280175674498	0.0346539612459064
CUT516	47	44	62	262	145	302	74	72	63	39	46	54	302	165	297	75	59	62	121.94	46	255	65	5.238	2.389	1.63752445494324e-16	7.29272514499491e-16
CUT517	26	15	26	3	3	5	17	9	16	22	16	23	3	3	5	17	7	16	12.42	20	4	13	0.223	-2.165	0.000283889747124854	0.000512044387235846
CUT518	2	0	3	2	1	4	1	3	1	2	0	3	2	1	4	1	2	1	1.79	2	2	1	1.451	0.537	0.569481412487535	0.62440981294139
CUT519	1	0	1	30	35	65	4	9	9	1	0	1	35	40	64	4	7	9	17.79	1	46	7	33.964	5.086	1.97611385014755e-08	5.05424960665885e-08
CUT520	6	1	2	11	8	12	8	7	4	5	1	2	13	9	12	8	6	4	6.56	3	11	6	3.808	1.929	0.00725602496236876	0.0112176091692342
CUT521	116	68	87	1546	790	955	210	231	231	96	71	76	1781	898	939	212	188	226	498.59	81	1206	209	14.004	3.808	3.31916576314914e-51	9.67276087485307e-50
CUT522	5	8	5	16	10	11	2	2	4	4	8	4	18	11	11	2	2	4	7.22	5	13	3	2.165	1.114	0.0764310410302481	0.102182032431012
CUT523	11	10	8	184	17	32	10	8	8	9	10	7	212	19	31	10	7	8	34.86	9	87	8	5.762	2.526	1.78688417461559e-05	3.60212669735343e-05
CUT524	46	28	52	80	44	72	28	38	39	38	29	46	92	50	71	28	31	38	47.01	38	71	32	1.828	0.87	0.00652552644337894	0.0101392503679466
CUT525	3	5	10	11	5	13	6	15	12	2	5	9	13	6	13	6	12	12	8.62	5	11	10	1.821	0.865	0.15950144288952	0.200336829493437
CUT526	16	10	9	149	114	124	26	39	34	13	10	8	172	130	122	26	32	33	60.66	10	141	30	12.523	3.646	4.52673043992799e-23	2.95527217435746e-22
CUT527	2	2	3	50	14	24	7	6	8	2	2	3	58	16	24	7	5	8	13.7	2	33	7	10.963	3.455	5.20690448926976e-07	1.19192724508534e-06
CUT528	16	8	7	13	10	14	10	7	5	13	8	6	15	11	14	10	6	5	9.83	9	13	7	1.429	0.515	0.318327453568715	0.374130003258976
CUT529	59	50	51	276	211	227	120	134	128	49	52	45	318	240	223	121	109	125	142.44	49	260	118	5.234	2.388	1.39093046602312e-21	8.31427796723589e-21
CUT530	19	14	7	169	54	82	42	24	23	16	15	6	195	61	81	42	20	22	50.85	12	112	28	8.191	3.034	7.20289102947141e-14	2.69958257121241e-13
CUT531	1	0	1	1	3	2	3	2	1	1	0	1	1	3	2	3	2	1	1.54	1	2	2	2.297	1.2	0.2404364403424	0.29080317137666
CUT532	43	33	34	22	17	18	29	26	33	36	34	30	25	19	18	29	21	32	27.2	33	21	27	0.643	-0.638	0.0863902793499508	0.114177426428808
CUT533	5	5	2	19	14	23	2	2	4	4	5	2	22	16	23	2	2	4	8.79	4	20	3	4.669	2.223	0.000640070230241407	0.00111423517214376
CUT534	14	5	16	18	14	26	6	8	11	12	5	14	21	16	26	6	7	11	12.93	10	21	8	1.93	0.948	0.0504761191343524	0.0694611314418325
CUT535	9	4	6	20	7	10	5	2	4	7	4	5	23	8	10	5	2	4	7.59	5	14	4	2.079	1.056	0.0779215469028537	0.103953626867603
CUT536	5	5	8	3	2	4	4	4	2	4	5	7	3	2	4	4	3	2	3.92	5	3	3	0.661	-0.597	0.413105415454948	0.47254795272186
CUT537	7	2	2	12	10	23	9	6	1	6	2	2	14	11	23	9	5	1	8.04	3	16	5	4.566	2.191	0.00308127036024541	0.00497687981061892
CUT538	0	0	0	16	14	12	0	1	2	0	0	0	18	16	12	0	1	2	5.44	0	15	1	26.614	4.734	5.1751022778895e-06	1.09202320728452e-05
CUT539	16	11	17	18	13	34	10	12	6	13	11	15	21	15	33	10	10	6	14.92	13	23	9	1.627	0.702	0.136264663632823	0.173879543482547
CUT540	2	2	5	61	14	26	21	21	22	2	2	4	70	16	26	21	17	22	19.96	3	37	20	10.071	3.332	2.81620062188162e-07	6.60050550888661e-07
CUT541	9	3	6	8	17	11	5	4	3	7	3	5	9	19	11	5	3	3	7.38	5	13	4	2.198	1.136	0.0712923412136496	0.0956841965571046
CUT542	12	13	17	2	3	3	11	10	6	10	14	15	2	3	3	11	8	6	8.01	13	3	8	0.268	-1.9	0.00569628036760847	0.00891717781324482
CUT543	9	12	10	5	1	6	8	7	7	7	12	9	6	1	6	8	6	7	6.9	9	4	7	0.492	-1.024	0.122635290330271	0.157861603048807
CUT544	52	41	91	68	113	86	38	39	31	43	43	80	78	129	85	38	32	30	61.91	55	97	33	1.718	0.781	0.0233547719766612	0.0338867476184831
CUT545	8	6	10	8	5	5	3	7	7	7	6	9	9	6	5	3	6	7	6.33	7	7	5	0.933	-0.1	0.870242305287198	0.894046137162158
CUT546	42	26	33	485	312	567	290	397	337	35	27	29	559	355	557	293	323	329	278.56	30	490	315	15.445	3.949	7.096095368664e-48	1.74212122853377e-46
CUT547	5	5	9	15	8	12	4	3	4	4	5	8	17	9	12	4	2	4	7.31	6	13	3	1.988	0.992	0.0999674658821853	0.130600313728252
CUT548	12	7	9	99	41	98	29	11	24	10	7	8	114	47	96	29	9	23	38.2	8	86	20	9.32	3.22	8.8150481216751e-15	3.54482630247403e-14
CUT549	211	128	117	21	24	30	131	75	127	175	133	102	24	27	29	132	61	124	89.87	137	27	106	0.208	-2.263	1.8989713119129e-10	5.5673303439574e-10
CUT550	4	5	16	1	1	6	4	12	14	3	5	14	1	1	6	4	10	14	6.47	7	3	9	0.422	-1.243	0.0905906073611246	0.119229849940545
CUT551	317	226	276	67	98	114	164	165	191	263	235	242	77	111	112	166	134	187	169.63	247	100	162	0.411	-1.281	2.39498502689609e-07	5.64042624431835e-07
CUT552	12	8	12	5	4	6	7	13	13	10	8	11	6	5	6	7	11	13	8.37	10	6	10	0.608	-0.718	0.216413903966661	0.264541096417824
CUT553	22	22	21	74	43	41	25	41	37	18	23	18	85	49	40	25	33	36	36.53	20	58	31	2.765	1.467	0.000241601582849815	0.000438069216009765
CUT554	117	77	98	1704	1044	2315	529	700	552	97	80	86	1963	1187	2275	534	570	539	814.7	88	1808	548	19.538	4.288	9.74333619569217e-64	6.12153907434724e-62
CUT555	3	3	5	4	1	5	2	0	5	2	3	4	5	1	5	2	0	5	3.06	3	4	2	0.96	-0.059	0.941478716572386	0.952812010207405
CUT556	12	11	19	53	29	43	31	22	26	10	11	17	61	33	42	31	18	25	27.66	13	45	25	3.364	1.75	2.43690170595846e-05	4.86630781541876e-05
CUT557	63	51	55	228	171	292	43	45	49	52	53	48	263	194	287	43	37	48	113.94	51	248	43	4.713	2.237	2.92770506946907e-18	1.43934208842303e-17
CUT558	2	2	0	17	4	8	7	7	7	2	2	0	20	5	8	7	6	7	6.15	1	11	7	5.832	2.544	0.00290036570919006	0.00470092561409085
CUT559	9	5	6	17	17	21	6	4	4	7	5	5	20	19	21	6	3	4	10.08	6	20	4	3.068	1.617	0.0037465536590274	0.0059934601039554
CUT560	13	5	9	90	65	65	11	14	6	11	5	8	104	74	64	11	11	6	32.64	8	81	9	9.223	3.205	5.68533894222953e-14	2.14873450449205e-13
CUT561	130	79	119	4036	1865	2802	344	240	272	108	82	104	4651	2121	2754	348	195	266	1180.88	98	3175	270	30.102	4.912	1.58829381519407e-109	4.8844214537784e-107
CUT562	31	11	14	37	29	61	19	16	14	26	11	12	43	33	60	19	13	14	25.65	16	45	15	2.693	1.429	0.000747534949202674	0.00129092558244162
CUT563	5	5	5	1	1	1	1	1	1	4	5	4	1	1	1	1	1	1	2.2	4	1	1	0.352	-1.506	0.107462507477819	0.139767040888792
CUT564	5	2	2	25	9	15	12	10	13	4	2	2	29	10	15	12	8	13	10.52	3	18	11	5.555	2.474	0.000173780593384	0.000319432986914305
CUT565	2	1	1	4	0	1	1	0	0	2	1	1	5	0	1	1	0	0	1.13	1	2	0	1.007	0.011	0.991622801668812	0.992642115838764
CUT566	8	4	8	9	6	12	4	6	5	7	4	7	10	7	12	4	5	5	6.73	6	10	5	1.508	0.592	0.315873729859506	0.371507689929367
CUT567	214	114	127	12	18	20	82	62	80	177	119	111	14	20	20	83	50	78	74.72	136	18	70	0.142	-2.812	2.66276703462238e-15	1.103051952024e-14
CUT568	14	7	5	2	2	2	8	7	3	12	7	4	2	2	2	8	6	3	5.17	8	2	6	0.363	-1.463	0.0530757746857906	0.07276437153662
CUT569	0	1	1	4	1	2	3	1	0	0	1	1	5	1	2	3	1	0	1.5	1	3	1	2.089	1.063	0.299856229440034	0.354524473617588
CUT570	1	1	3	23	19	14	3	3	1	1	1	3	27	22	14	3	2	1	8.09	2	21	2	9.442	3.239	2.79098799917852e-05	5.54779482197655e-05
CUT571	47	27	40	9	2	3	25	25	29	39	28	35	10	2	3	25	20	28	21.29	34	5	24	0.162	-2.63	1.12780401612765e-06	2.5051354747135e-06
CUT572	16	11	20	197	74	220	22	32	27	13	11	18	227	84	216	22	26	26	71.58	14	176	25	11.196	3.485	7.39396965032853e-19	3.7551468637001e-18
CUT573	1	0	1	2	0	8	3	9	8	1	0	1	2	0	8	3	7	8	3.34	1	3	6	2.839	1.505	0.131643419104863	0.168516266366461
CUT574	0	0	1	18	3	5	1	2	1	0	0	1	21	3	5	1	2	1	3.73	0	10	1	9.558	3.257	0.00180699526155855	0.00299567975976355
CUT575	11	4	15	64	65	112	14	19	21	9	4	13	74	74	110	14	15	21	37.14	9	86	17	9.114	3.188	6.12852279980505e-15	2.4815633208081e-14
CUT576	2	1	1	0	2	0	0	0	0	2	1	1	0	2	0	0	0	0	0.65	1	1	0	0.715	-0.484	0.648870408611825	0.699704677958641
CUT577	12	10	8	25	16	28	8	10	17	10	10	7	29	18	28	8	8	17	14.97	9	25	11	2.497	1.32	0.00819650413975523	0.0125717741668434
CUT578	103	57	110	205	152	163	64	75	64	85	59	96	236	173	160	65	61	63	110.93	80	190	63	2.318	1.213	4.42511138494984e-06	9.40386463802942e-06
CUT579	13	17	15	18	21	55	52	46	37	11	18	13	21	24	54	53	37	36	29.6	14	33	42	2.179	1.124	0.0142895536860919	0.0213239336452139
CUT580	14	9	5	1	3	7	9	18	16	12	9	4	1	3	7	9	15	16	8.46	8	4	13	0.493	-1.02	0.133312946037832	0.170354848266605
CUT581	19	11	11	121	56	107	23	29	34	16	11	10	139	64	105	23	24	33	47.24	12	103	27	7.705	2.946	6.19295075996688e-14	2.33153423263444e-13
CUT582	3	3	7	45	13	26	8	9	14	2	3	6	52	15	26	8	7	14	14.78	4	31	10	6.513	2.703	1.34228574701802e-05	2.74181982864055e-05
CUT583	23	22	25	45	24	50	57	56	60	19	23	22	52	27	49	58	46	59	39.32	21	43	54	1.912	0.935	0.00805157138671775	0.0123752182173122
CUT584	26	15	18	69	29	45	20	23	34	22	16	16	80	33	44	20	19	33	31.31	18	52	24	2.741	1.455	0.000401542195097158	0.000712809067583987
CUT585	20	23	11	10	6	13	9	19	28	17	24	10	12	7	13	9	15	27	14.8	17	11	17	0.655	-0.61	0.258315006951983	0.310147865122868
CUT586	2	1	1	2	1	2	1	3	3	2	1	1	2	1	2	1	2	3	1.71	1	2	2	1.305	0.384	0.681353255006321	0.729214592728626
CUT587	20	12	21	19	5	20	21	22	28	17	12	18	22	6	20	21	18	27	17.91	16	16	22	0.957	-0.064	0.885621871856392	0.907442103859167
CUT588	6	10	9	7	4	5	7	10	12	5	10	8	8	5	5	7	8	12	7.52	8	6	9	0.805	-0.313	0.601146884987853	0.654645652592307
CUT589	4	3	8	29	10	9	7	7	4	3	3	7	33	11	9	7	6	4	9.31	4	18	6	3.056	1.611	0.0136632113946871	0.020451939074973
CUT590	21	13	20	59	29	31	9	17	16	17	14	18	68	33	30	9	14	16	24.27	16	44	13	2.498	1.321	0.00294500879349093	0.00476931440697548
CUT591	17	16	11	42	20	24	50	65	67	14	17	10	48	23	24	51	53	65	33.78	14	32	56	2.193	1.133	0.00816524036548849	0.0125287551091253
CUT592	42	46	46	188	118	177	77	92	92	35	48	40	217	134	174	78	75	90	98.92	41	175	81	4.146	2.052	2.67340646796609e-12	8.96711480615723e-12
CUT593	9	5	10	3	0	3	1	5	3	7	5	9	3	0	3	1	4	3	3.98	7	2	3	0.378	-1.405	0.0923946676755612	0.121426460465206
CUT594	2	2	9	0	4	1	4	0	1	2	2	8	0	5	1	4	0	1	2.46	4	2	2	0.645	-0.632	0.515959225145261	0.572765223240003
CUT595	1	1	4	0	3	2	2	0	2	1	1	4	0	3	2	2	0	2	1.64	2	2	1	1.055	0.077	0.937283037446828	0.949305735448399
CUT596	4	3	4	0	1	0	4	1	4	3	3	4	0	1	0	4	1	4	2.2	3	0	3	0.249	-2.004	0.0561373400535447	0.0766290101466795
CUT597	2	2	1	21	7	17	4	2	1	2	2	1	24	8	17	4	2	1	6.68	2	16	2	7.572	2.921	0.000250360285576187	0.00045310675193485
CUT598	7	9	9	100	52	68	22	24	13	6	9	8	115	59	67	22	20	13	35.41	8	80	18	9.362	3.227	5.92931452905117e-13	2.07890697829259e-12
CUT599	38	34	47	153	106	220	40	30	44	31	35	41	176	121	216	40	24	43	80.99	36	171	36	4.559	2.189	2.39064323501964e-14	9.2875853871142e-14
CUT600	28	20	30	43	29	84	10	10	15	23	21	26	50	33	83	10	8	15	29.8	23	55	11	2.165	1.114	0.00245963125600059	0.00401442051084118
CUT601	8	9	11	19	16	16	5	6	10	7	9	10	22	18	16	5	5	10	11.24	9	19	7	2.046	1.033	0.0487801441129619	0.0673254711354758
CUT602	54	64	76	593	331	155	84	83	73	45	67	67	683	376	152	85	68	71	179.3	60	404	75	5.713	2.514	8.7696605319768e-10	2.46470064878982e-09
CUT603	2	1	0	0	0	0	0	1	0	2	1	0	0	0	0	0	1	0	0.39	1	0	0	0.705	-0.504	0.607100775276196	0.660513886963748
CUT604	10	4	9	1	1	1	4	11	3	8	4	8	1	1	1	4	9	3	4.39	7	1	5	0.234	-2.096	0.0208778732915147	0.030470691555469
CUT605	72	79	93	205	117	137	80	89	72	60	82	81	236	133	135	81	72	70	105.64	74	168	74	2.148	1.103	0.000251073835255345	0.000454327785505413
CUT606	21	20	27	235	91	139	21	24	36	17	21	24	271	103	137	21	20	35	72.07	21	170	25	7.436	2.894	3.50377637741605e-13	1.24946996479963e-12
CUT607	24	17	33	69	44	72	23	23	24	20	18	29	80	50	71	23	19	23	36.91	22	67	22	2.923	1.547	7.28972427203168e-06	1.51985223627051e-05
CUT608	2	3	3	8	1	8	3	6	5	2	3	3	9	1	8	3	5	5	4.27	3	6	4	1.97	0.979	0.212949073872826	0.260687500238618
CUT609	2	2	7	6	3	11	4	1	4	2	2	6	7	3	11	4	1	4	4.42	3	7	3	1.892	0.92	0.211491223698407	0.259119987433381
CUT610	2	2	9	13	17	28	2	2	4	2	2	8	15	19	28	2	2	4	9	4	21	3	5.044	2.334	0.000334257725602089	0.000598458063641184
CUT611	4	1	2	1	4	12	3	6	3	3	1	2	1	5	12	3	5	3	3.83	2	6	4	2.001	1.001	0.228429615565445	0.277458526920049
CUT612	24	17	21	7	4	23	18	21	8	20	18	18	8	5	23	18	17	8	14.92	19	12	14	0.648	-0.627	0.258931651145694	0.310760529453484
CUT613	18	16	25	173	53	101	33	19	17	15	17	22	199	60	99	33	15	17	53.08	18	119	22	5.695	2.51	4.37092863497568e-10	1.24886728675613e-09
CUT614	7	2	10	2	4	6	7	5	8	6	2	9	2	5	6	7	4	8	5.37	6	4	6	0.843	-0.246	0.714629248401765	0.759196126983912
CUT615	9	14	12	35	21	50	19	10	16	7	15	11	40	24	49	19	8	16	20.98	11	38	14	3.158	1.659	0.000580810293009818	0.00101531025940355
CUT616	8	5	1	4	5	9	1	9	7	7	5	1	5	6	9	1	7	7	5.22	4	7	5	1.344	0.426	0.567978978277353	0.62287934873772
CUT617	16	12	7	0	1	1	0	3	4	13	12	6	0	1	1	0	2	4	4.48	10	1	2	0.124	-3.008	0.00268865543423806	0.00437355615318847
CUT618	10	9	1	23	10	16	4	5	5	8	9	1	27	11	16	4	4	5	9.46	6	18	4	2.722	1.445	0.0248277097512958	0.035890229608318
CUT619	13	11	26	10	6	11	10	18	15	11	11	23	12	7	11	10	15	15	12.62	15	10	13	0.701	-0.513	0.304596332814275	0.359655728530627
CUT620	18	9	18	6	26	15	6	12	6	15	9	16	7	30	15	6	10	6	12.55	13	17	7	1.113	0.155	0.76734332938658	0.805645394612004
CUT621	14	10	8	99	65	67	11	14	16	12	10	7	114	74	66	11	11	16	35.67	10	85	13	8.088	3.016	4.55264535325708e-13	1.60731763136442e-12
CUT622	23	17	21	277	60	125	74	78	74	19	18	18	319	68	123	75	63	72	86.22	18	170	70	7.556	2.918	3.2723062931847e-12	1.09008470188587e-11
CUT623	7	8	6	2	0	6	9	11	0	6	8	5	2	0	6	9	9	0	5.07	6	3	6	0.562	-0.832	0.34030496434027	0.397005472025596
CUT624	12	7	13	26	25	59	19	17	13	10	7	11	30	28	58	19	14	13	21.19	9	39	15	3.754	1.909	4.4703128330233e-05	8.70232813038653e-05
CUT625	2	4	0	1	1	0	1	1	2	2	4	0	1	1	0	1	1	2	1.32	2	1	1	0.638	-0.649	0.529896280125801	0.586565115994138
CUT626	5	3	9	141	39	73	4	6	5	4	3	8	162	44	72	4	5	5	34.17	5	93	5	14.493	3.857	1.69008768188696e-12	5.75980304769058e-12
CUT627	12	6	9	55	45	37	6	9	5	10	6	8	63	51	36	6	7	5	21.47	8	50	6	5.701	2.511	4.19415685356369e-08	1.04795631795479e-07
CUT628	42	39	54	43	61	51	27	53	38	35	41	47	50	69	50	27	43	37	44.36	41	56	36	1.342	0.425	0.162287396621527	0.203398811338391
CUT629	2	3	3	6	3	5	1	1	0	2	3	3	7	3	5	1	1	0	2.72	3	5	1	1.713	0.776	0.343249762203462	0.40004167243088
CUT630	22	10	9	24	15	15	7	10	17	18	10	8	28	17	15	7	8	17	14.2	12	20	11	1.54	0.623	0.221343991574163	0.269974520982744
CUT631	7	5	6	1	1	3	7	13	17	6	5	5	1	1	3	7	11	17	6.2	5	2	12	0.384	-1.382	0.0773404869416209	0.103267930804363
CUT632	81	56	74	313	139	170	72	80	80	67	58	65	361	158	167	73	65	78	121.33	63	229	72	3.352	1.745	1.05684139602652e-08	2.74694140435185e-08
CUT633	18	11	15	69	38	76	14	11	19	15	11	13	80	43	75	14	9	19	30.95	13	66	14	4.701	2.233	8.5034580345505e-09	2.229558236297e-08
CUT634	18	14	20	97	63	88	43	50	38	15	15	18	112	72	86	43	41	37	48.68	16	90	40	5.477	2.453	1.06215263823808e-12	3.66685841372236e-12
CUT635	14	20	21	39	14	16	20	8	13	12	21	18	45	16	16	20	7	13	18.53	17	26	13	1.274	0.349	0.47926716004983	0.537238947946505
CUT636	4	5	2	0	3	4	8	8	16	3	5	2	0	3	4	8	7	16	5.32	3	2	10	0.725	-0.464	0.5535019795232	0.609003307853132
CUT637	2	3	5	13	5	7	2	9	2	2	3	4	15	6	7	2	7	2	5.33	3	9	4	2.49	1.316	0.0839890437620904	0.111192473706105
CUT638	14	6	8	4	1	1	7	4	3	12	6	7	5	1	1	7	3	3	4.98	8	2	4	0.308	-1.697	0.0301363867882209	0.0429899677743102
CUT639	12	9	10	154	92	80	44	36	34	10	9	9	177	105	79	44	29	33	55.08	9	120	35	11.58	3.534	8.73812119236216e-20	4.70455028916864e-19
CUT640	50	39	59	237	108	233	64	78	76	41	41	52	273	123	229	65	63	74	106.77	45	208	67	4.436	2.149	9.88251839001928e-13	3.42184029350416e-12
CUT641	7	7	2	148	69	59	11	4	9	6	7	2	171	78	58	11	3	9	38.33	5	102	8	17.227	4.107	1.98764280234117e-15	8.28964803289039e-15
CUT642	5	4	1	2	3	9	1	2	2	4	4	1	2	3	9	1	2	2	3.15	3	5	2	1.336	0.418	0.603417460602821	0.656873446167169
CUT643	18	7	9	1	3	2	5	10	11	15	7	8	1	3	2	5	8	11	6.73	10	2	8	0.268	-1.897	0.0132413546547997	0.01985353740005
CUT644	21	15	15	13	8	15	10	14	13	17	16	13	15	9	15	10	11	13	13.24	15	13	11	0.856	-0.224	0.626757759164137	0.679248997001689
CUT645	26	20	24	102	47	107	44	34	41	22	21	21	118	53	105	44	28	40	50.19	21	92	37	4.082	2.029	2.63147624046475e-09	7.14153073526963e-09
CUT646	10	3	10	20	9	24	10	8	7	8	3	9	23	10	24	10	7	7	11.16	7	19	8	2.587	1.371	0.0115828354826957	0.0174519101922101
CUT647	25	13	10	2	2	5	8	4	11	21	14	9	2	2	5	8	3	11	8.29	15	3	7	0.261	-1.937	0.00601606187939789	0.0093926117732323
CUT648	1	0	4	2	3	5	0	3	1	1	0	4	2	3	5	0	2	1	2.04	2	3	1	1.95	0.963	0.313191102686178	0.368723677814897
CUT649	6	4	7	3	2	4	10	12	7	5	4	6	3	2	4	10	10	7	5.74	5	3	9	0.692	-0.53	0.437096976860439	0.496154955958338
CUT650	3	7	4	39	19	45	3	11	8	2	7	4	45	22	44	3	9	8	15.98	4	37	7	7.511	2.909	3.03440695347603e-06	6.53040141037216e-06
CUT651	10	11	14	45	31	41	23	31	27	8	11	12	52	35	40	23	25	26	26.03	10	42	25	3.798	1.925	4.69142359843718e-06	9.9517110494349e-06
CUT652	20	15	12	79	55	72	22	23	20	17	16	11	91	63	71	22	19	20	36.39	15	75	20	5.056	2.338	1.65821151752002e-10	4.88476425352633e-10
CUT653	1	5	6	3	3	5	2	5	5	1	5	5	3	3	5	2	4	5	3.78	4	4	4	1.131	0.178	0.809697744136332	0.843402071305568
CUT654	29	21	34	148	59	176	27	29	22	24	22	30	171	67	173	27	24	22	62.07	25	137	24	4.991	2.319	1.41538636937437e-10	4.20015365985497e-10
CUT655	45	47	37	263	101	147	27	44	35	37	49	32	303	115	144	27	36	34	86.47	39	187	32	4.379	2.131	1.72791517685688e-08	4.43594392722967e-08
CUT656	36	18	23	25	19	25	22	21	21	30	19	20	29	22	25	22	17	21	22.61	23	25	20	1.091	0.125	0.734847337191852	0.777157344098654
CUT657	3	7	9	58	66	38	6	8	6	2	7	8	67	75	37	6	7	6	23.92	6	60	6	8.957	3.163	1.52253962161182e-09	4.19929148410567e-09
CUT658	0	0	1	0	0	0	0	0	0	0	0	1	0	0	0	0	0	0	0.1	0	0	0	0.899	-0.153	0.868830716876954	NA
CUT659	0	2	5	1	3	1	3	3	2	0	2	4	1	3	1	3	2	2	2.16	2	2	2	0.956	-0.066	0.943418433208025	0.954279218425429
CUT660	7	3	4	6	2	6	3	1	3	6	3	4	7	2	6	3	1	3	3.81	4	5	2	1.131	0.177	0.803379944587263	0.837866848054151
CUT661	39	24	50	98	34	77	27	27	30	32	25	44	113	39	76	27	22	29	45.21	34	76	26	2.092	1.065	0.00242323912963964	0.00395723483356189
CUT662	2	7	4	96	106	131	19	15	10	2	7	4	111	121	129	19	12	10	45.95	4	120	14	25.573	4.677	3.05213467781287e-20	1.68639460259675e-19
CUT663	0	4	1	2	1	2	1	3	4	0	4	1	2	1	2	1	2	4	1.98	2	2	2	1.306	0.385	0.684145661958064	0.731801025688049
CUT664	3	5	8	10	4	8	2	6	2	2	5	7	12	5	8	2	5	2	5.28	5	8	3	1.528	0.611	0.375067211566185	0.433106268217633
CUT665	55	41	77	33	30	27	43	50	49	46	43	67	38	34	27	43	41	48	42.92	52	33	44	0.656	-0.608	0.0676097627768858	0.0911289143956964
CUT666	9	1	3	12	10	7	6	4	1	7	1	3	14	11	7	6	3	1	5.94	4	11	3	2.678	1.421	0.0449037771564019	0.0622705255887531
CUT667	2	5	12	0	2	9	6	5	3	2	5	11	0	2	9	6	4	3	4.62	6	4	4	0.666	-0.587	0.468696312618856	0.52715929829297
CUT668	8	6	3	21	8	23	2	5	6	7	6	3	24	9	23	2	4	6	9.26	5	19	4	3.06	1.614	0.0117970118774856	0.0177562958269315
CUT669	14	13	16	8	5	11	19	15	15	12	14	14	9	6	11	19	12	15	12.32	13	9	15	0.686	-0.543	0.278601763520799	0.332150602785559
CUT670	13	5	11	4	2	9	8	6	6	11	5	10	5	2	9	8	5	6	6.68	9	5	6	0.656	-0.608	0.330140739718377	0.386382041497142
CUT671	12	8	20	13	3	4	13	9	11	10	8	18	15	3	4	13	7	11	9.92	12	7	10	0.613	-0.706	0.233402304546674	0.28291041706591
CUT672	21	33	19	264	101	179	40	48	59	17	34	17	304	115	176	40	39	58	88.94	23	198	46	7.87	2.976	2.65090355055057e-12	8.89929873362079e-12
CUT673	18	18	29	148	20	20	19	14	16	15	19	25	171	23	20	19	11	16	35.35	20	71	15	2.197	1.135	0.0436330128141381	0.0606512891335813
CUT674	7	6	6	3	6	4	2	1	7	6	6	5	3	7	4	2	1	7	4.58	6	5	3	0.85	-0.235	0.743379034248448	0.784957747738987
CUT675	0	1	2	0	0	0	1	0	0	0	1	2	0	0	0	1	0	0	0.42	1	0	0	0.642	-0.64	0.518075025595324	0.574812472605553
CUT676	1	0	0	0	0	1	1	0	2	1	0	0	0	0	1	1	0	2	0.53	0	0	1	1.02	0.029	0.978134906496067	0.981831688482481
CUT677	211	132	146	27	47	150	148	127	150	175	137	128	31	53	147	150	103	147	119.04	147	77	133	0.49	-1.03	0.0114247008121994	0.0172225301459446
CUT678	0	2	4	5	2	3	3	3	2	0	2	4	6	2	3	3	2	2	2.67	2	4	2	1.675	0.744	0.397457391634545	0.456839488407721
CUT679	16	12	13	13	11	13	4	9	7	13	12	11	15	13	13	4	7	7	10.62	12	14	6	1.072	0.101	0.836040273660458	0.865058140428202
CUT680	0	0	0	0	0	0	0	0	0	0	0	0	0	0	0	0	0	0	0	0	0	0	1	0	NA	NA
CUT681	6	3	0	1	2	3	0	1	2	5	3	0	1	2	3	0	1	2	1.91	3	2	1	0.832	-0.266	0.780683389884775	0.817259347325404
CUT682	6	5	3	32	11	17	9	10	9	5	5	3	37	13	17	9	8	9	11.66	4	22	9	4.387	2.133	0.000404964834825701	0.000718775677365301
CUT683	4	4	4	56	25	36	17	18	15	3	4	4	65	28	35	17	15	15	20.64	4	43	16	9.849	3.3	2.50133215568096e-09	6.79622589427753e-09
CUT684	5	7	5	15	7	6	16	8	7	4	7	4	17	8	6	16	7	7	8.5	5	10	10	1.666	0.737	0.222273156615112	0.270966420634696
[truncated: 10,276 more rows]

## Sheet: Column description
	Column	Column description
	Id	Identifier
	WT_2154_R1	Count WT input, replicate 1
	WT_2154_R2	Count WT input, replicate 2
	WT_2154_R3	Count WT input, replicate 3
	RIP_3730_R1	Count Upf1-RIP, replicate 1
	RIP_3730_R2	Count Upf1-RIP, replicate 2
	RIP_3730_R3	Count Upf1-RIP, replicate 3
	del_1667_R1	Count upf1_delta, replicate 1
	del_1667_R2	Count upf1_delta, replicate 2
	del_1667_R3	Count upf1_delta, replicate 3
	norm.WT_2154_R1	normalized count WT input, replicate 1
	norm.WT_2154_R2	normalized count WT input, replicate 2
	norm.WT_2154_R3	normalized count WT input, replicate 3
	norm.RIP_3730_R1	normalized count Upf1-RIP, replicate 1
	norm.RIP_3730_R2	normalized count Upf1-RIP, replicate 2
	norm.RIP_3730_R3	normalized count Upf1-RIP, replicate 3
	norm.del_1667_R1	normalized count upf1_delta, replicate 1
	norm.del_1667_R2	normalized count upf1_delta, replicate 2
	norm.del_1667_R3	normalized count upf1_delta, replicate 3
	baseMean	mean count across all the replicates
	WT_Input	Mean count WT
	Upf1_RIP	Mean count Upf1 RIP
	upf1_delta	Mean count upf1 delta
	FoldChange_RIPvsInput	FoldChange RIP versus Input
	log2FoldChange_RIPvsInput	log2FoldChange RIP versus Input
	pvalue	p value foldChange
	padj	adjusted p value foldChange
