# Supplementary material for: Nonsense-mediated mRNA decay factors target short poly(A)-tailed mRNAs lacking a premature termination codon
Source: Nat Commun. 2026 Apr 17;17:5333. doi: 10.1038/s41467-026-72132-1 (PMC13273070; doi:10.1038/s41467-026-72132-1)
Supplement: Supplementary file 5 — Supplementary Data 3 [file 41467_2026_72132_MOESM5_ESM.xlsx]

## Sheet: Nanopore_UPF1RIPvsWT
Id	Syst_name	Gene	WT1	WT2	WT3	RIP_UPF1_1	RIP_UPF1_2	RIP_UPF1_3	RIP_eIF4G2_1	RIP_eIF4G2_2	RIP_eIF4G2_3	UPF1Delta1	UPF1Delta2	UPF1Delta3	RIP_Upf1_del_Upf2_1	RIP_Upf1_del_Upf2_2	RIP_Upf1_del_Upf2_3	TOT_Upf1_del_Upf2_1	TOT_Upf1_del_Upf2_2	TOT_Upf1_del_Upf2_3	RIP_Upf1_del_Upf3_1	RIP_Upf1_del_Upf3_2	RIP_Upf1_del_Upf3_3	TOT_Upf1_del_Upf3_1	TOT_Upf1_del_Upf3_2	TOT_Upf1_del_Upf3_3	norm.WT1	norm.WT2	norm.WT3	norm.RIP_UPF1_1	norm.RIP_UPF1_2	norm.RIP_UPF1_3	norm.RIP_eIF4G2_1	norm.RIP_eIF4G2_2	norm.RIP_eIF4G2_3	norm.UPF1Delta1	norm.UPF1Delta2	norm.UPF1Delta3	norm.RIP_Upf1_del_Upf2_1	norm.RIP_Upf1_del_Upf2_2	norm.RIP_Upf1_del_Upf2_3	norm.TOT_Upf1_del_Upf2_1	norm.TOT_Upf1_del_Upf2_2	norm.TOT_Upf1_del_Upf2_3	norm.RIP_Upf1_del_Upf3_1	norm.RIP_Upf1_del_Upf3_2	norm.RIP_Upf1_del_Upf3_3	norm.TOT_Upf1_del_Upf3_1	norm.TOT_Upf1_del_Upf3_2
CUT_GIM_0001	CUT_GIM_0001	CUT_GIM_0001	5	4	4	3	2	3	222	39	46	20	0	10	3	3	0	9	2	3	1	2	1	3	2	1	5	7	4	2	2	3	19	16	21	5	0	5	11	5	0	4	2	2	4	5	2	3	2
CUT_GIM_0002	CUT_GIM_0002	CUT_GIM_0002	0	0	0	0	0	1	4	7	7	0	0	0	0	0	0	0	0	0	0	0	0	0	0	0	0	0	0	0	0	1	0	3	3	0	0	0	0	0	0	0	0	0	0	0	0	0	0
CUT_GIM_0003	CUT_GIM_0003	CUT_GIM_0003	0	1	1	0	0	1	18	17	21	2	0	1	0	0	1	0	0	0	0	0	0	0	0	1	0	2	1	0	0	1	2	7	10	0	0	0	0	0	3	0	0	0	0	0	0	0	0
CUT_GIM_0004	CUT_GIM_0004	CUT_GIM_0004	0	0	1	1	0	0	28	5	14	0	0	0	0	0	0	3	2	1	0	0	0	0	0	0	0	0	1	1	0	0	2	2	6	0	0	0	0	0	0	1	2	1	0	0	0	0	0
CUT_GIM_0005	CUT_GIM_0005	CUT_GIM_0005	53	29	59	113	69	98	1802	319	283	253	3	88	18	42	22	117	45	96	16	18	30	45	60	91	57	50	59	77	70	87	155	133	129	62	41	41	64	73	58	58	42	60	61	45	66	40	49
CUT_GIM_0006	CUT_GIM_0006	CUT_GIM_0006	1	1	3	6	0	4	38	29	20	17	0	9	1	6	0	6	3	6	2	2	1	2	4	7	1	2	3	4	0	4	3	12	9	4	0	4	4	10	0	3	3	4	8	5	2	2	3
CUT_GIM_0007	CUT_GIM_0007	CUT_GIM_0007	0	0	0	3	0	1	24	17	12	5	0	4	0	0	0	2	0	2	0	2	0	1	0	0	0	0	0	2	0	1	2	7	5	1	0	2	0	0	0	1	0	1	0	5	0	1	0
CUT_GIM_0008	CUT_GIM_0008	CUT_GIM_0008	91	52	78	282	157	150	3250	1202	1138	365	10	221	17	47	29	148	73	103	17	37	29	62	84	144	98	89	78	192	159	133	280	501	517	90	137	103	60	82	76	73	67	65	65	93	64	55	69
CUT_GIM_0009	CUT_GIM_0009	CUT_GIM_0009	2	0	0	2	1	0	14	5	11	1	0	1	0	0	0	1	0	0	0	0	1	3	0	1	2	0	0	1	1	0	1	2	5	0	0	0	0	0	0	0	0	0	0	0	2	3	0
CUT_GIM_0010	CUT_GIM_0010	CUT_GIM_0010	1	0	5	10	0	2	56	16	33	3	0	1	0	3	0	4	1	2	1	0	0	2	4	0	1	0	5	7	0	2	5	7	15	1	0	0	0	5	0	2	1	1	4	0	0	2	3
CUT_GIM_0011	CUT_GIM_0011	CUT_GIM_0011	0	1	0	4	0	1	6	6	13	5	0	2	0	0	0	2	0	0	0	0	0	2	1	1	0	2	0	3	0	1	1	2	6	1	0	1	0	0	0	1	0	0	0	0	0	2	1
CUT_GIM_0012	CUT_GIM_0012	CUT_GIM_0012	26	8	22	22	18	27	764	146	118	117	2	42	5	24	11	68	28	50	7	4	16	17	27	48	28	14	22	15	18	24	66	61	54	29	27	20	18	42	29	33	26	31	27	10	35	15	22
CUT_GIM_0013	CUT_GIM_0013	CUT_GIM_0013	41	10	24	27	20	21	1518	297	224	72	1	38	2	11	4	34	18	21	3	2	6	10	20	36	44	17	24	18	20	19	131	124	102	18	14	18	7	19	10	17	17	13	12	5	13	9	16
CUT_GIM_0014	CUT_GIM_0014	CUT_GIM_0014	0	0	0	0	0	0	0	2	1	0	0	0	0	0	0	0	0	0	0	0	0	0	0	0	0	0	0	0	0	0	0	1	0	0	0	0	0	0	0	0	0	0	0	0	0	0	0
CUT_GIM_0015	CUT_GIM_0015	CUT_GIM_0015	2	2	2	2	1	1	54	23	20	2	0	2	0	0	0	4	2	1	0	0	1	2	0	4	2	3	2	1	1	1	5	10	9	0	0	1	0	0	0	2	2	1	0	0	2	2	0
CUT_GIM_0016	CUT_GIM_0016	CUT_GIM_0016	69	5	31	94	141	203	412	61	34	250	0	38	24	61	43	255	155	290	26	47	64	157	187	273	74	9	31	64	143	179	36	25	15	62	0	18	85	106	113	125	143	182	100	118	141	139	154
CUT_GIM_0017	CUT_GIM_0017	CUT_GIM_0017	0	0	1	0	0	0	20	5	9	2	0	0	0	0	0	1	0	1	0	0	0	0	0	0	0	0	1	0	0	0	2	2	4	0	0	0	0	0	0	0	0	1	0	0	0	0	0
CUT_GIM_0018	CUT_GIM_0018	CUT_GIM_0018	0	0	0	0	0	0	4	1	0	0	0	0	0	0	0	0	0	0	0	0	0	0	0	0	0	0	0	0	0	0	0	0	0	0	0	0	0	0	0	0	0	0	0	0	0	0	0
CUT_GIM_0019	CUT_GIM_0019	CUT_GIM_0019	271	75	209	103	141	153	1670	300	346	910	9	432	32	98	48	373	304	477	32	57	87	194	393	533	291	128	208	70	143	135	144	125	157	224	123	202	114	171	126	183	281	300	123	143	191	172	324
CUT_GIM_0020	CUT_GIM_0020	CUT_GIM_0020	2	0	1	8	0	2	44	19	17	10	0	3	0	2	0	4	0	6	2	1	2	3	2	5	2	0	1	5	0	2	4	8	8	2	0	1	0	3	0	2	0	4	8	3	4	3	2
CUT_GIM_0021	CUT_GIM_0021	CUT_GIM_0021	22	5	29	13	21	18	614	88	66	192	2	72	2	2	1	37	8	20	1	5	2	5	25	26	24	9	29	9	21	16	53	37	30	47	27	34	7	3	3	18	7	13	4	13	4	4	21
CUT_GIM_0022	CUT_GIM_0022	CUT_GIM_0022	22	6	15	20	11	8	264	58	49	64	3	60	13	9	2	44	13	17	8	3	11	20	20	20	24	10	15	14	11	7	23	24	22	16	41	28	46	16	5	22	12	11	31	8	24	18	16
CUT_GIM_0023	CUT_GIM_0023	CUT_GIM_0023	440	258	495	1008	942	881	10270	2643	2335	855	11	198	91	343	247	609	638	1252	61	272	253	284	849	1085	472	441	492	687	953	779	885	1101	1061	211	150	92	323	597	647	299	589	787	234	684	556	252	700
CUT_GIM_0024	CUT_GIM_0024	CUT_GIM_0024	0	3	2	1	0	0	38	30	42	4	0	1	0	0	0	2	1	2	0	0	0	1	0	4	0	5	2	1	0	0	3	12	19	1	0	0	0	0	0	1	1	1	0	0	0	1	0
CUT_GIM_0025	CUT_GIM_0025	CUT_GIM_0025	0	0	3	2	0	0	42	34	37	1	0	0	0	0	1	4	5	1	0	0	0	3	1	1	0	0	3	1	0	0	4	14	17	0	0	0	0	0	3	2	5	1	0	0	0	3	1
CUT_GIM_0026	CUT_GIM_0026	CUT_GIM_0026	66	31	116	24	45	34	1390	601	582	198	3	2187	23	21	13	261	53	76	8	51	32	45	315	229	71	53	115	16	46	30	120	250	265	49	41	1020	82	37	34	128	49	48	31	128	70	40	260
CUT_GIM_0027	CUT_GIM_0027	CUT_GIM_0027	1	0	1	3	2	2	14	9	6	1	0	1	0	1	3	1	0	3	1	1	0	1	0	2	1	0	1	2	2	2	1	4	3	0	0	0	0	2	8	0	0	2	4	3	0	1	0
CUT_GIM_0028	CUT_GIM_0028	CUT_GIM_0028	3	3	5	4	0	3	88	24	30	25	1	18	2	0	0	9	4	1	0	0	0	1	0	6	3	5	5	3	0	3	8	10	14	6	14	8	7	0	0	4	4	1	0	0	0	1	0
CUT_GIM_0029	CUT_GIM_0029	CUT_GIM_0029	15	4	9	4	6	19	188	48	51	71	0	18	0	2	2	18	10	17	2	2	3	9	12	22	16	7	9	3	6	17	16	20	23	17	0	8	0	3	5	9	9	11	8	5	7	8	10
CUT_GIM_0030	CUT_GIM_0030	CUT_GIM_0030	19	9	57	22	15	10	1726	239	167	244	4	101	5	14	8	95	33	62	4	13	9	33	83	94	20	15	57	15	15	9	149	100	76	60	55	47	18	24	21	47	30	39	15	33	20	29	68
CUT_GIM_0031	CUT_GIM_0031	CUT_GIM_0031	13	5	5	26	23	19	224	40	29	95	1	35	2	15	10	49	22	32	3	7	8	12	20	25	14	9	5	18	23	17	19	17	13	23	14	16	7	26	26	24	20	20	12	18	18	11	16
CUT_GIM_0032	CUT_GIM_0032	CUT_GIM_0032	2	2	2	6	7	10	84	31	23	8	1	8	0	0	1	2	5	8	0	3	3	2	4	7	2	3	2	4	7	9	7	13	10	2	14	4	0	0	3	1	5	5	0	8	7	2	3
CUT_GIM_0033	CUT_GIM_0033	CUT_GIM_0033	0	0	0	1	1	1	10	6	9	0	0	0	0	0	1	0	0	0	0	1	0	0	0	0	0	0	0	1	1	1	1	2	4	0	0	0	0	0	3	0	0	0	0	3	0	0	0
CUT_GIM_0034	CUT_GIM_0034	CUT_GIM_0034	0	0	1	0	0	1	4	4	2	0	0	0	0	0	0	1	0	1	0	0	0	0	0	1	0	0	1	0	0	1	0	2	1	0	0	0	0	0	0	0	0	1	0	0	0	0	0
CUT_GIM_0035	CUT_GIM_0035	CUT_GIM_0035	0	4	0	0	3	1	58	7	11	19	0	4	1	1	2	3	3	7	0	3	0	1	4	6	0	7	0	0	3	1	5	3	5	5	0	2	4	2	5	1	3	4	0	8	0	1	3
CUT_GIM_0036	CUT_GIM_0036	CUT_GIM_0036	1	0	1	3	6	3	44	22	23	1	0	1	0	0	1	2	0	6	0	0	0	4	4	0	1	0	1	2	6	3	4	9	10	0	0	0	0	0	3	1	0	4	0	0	0	4	3
CUT_GIM_0037	CUT_GIM_0037	CUT_GIM_0037	0	3	1	0	0	0	40	29	43	3	0	0	0	0	0	2	0	0	0	0	0	0	0	2	0	5	1	0	0	0	3	12	20	1	0	0	0	0	0	1	0	0	0	0	0	0	0
CUT_GIM_0038	CUT_GIM_0038	CUT_GIM_0038	1	2	2	2	1	0	40	34	33	2	0	0	0	0	0	5	0	4	0	0	0	3	3	6	1	3	2	1	1	0	3	14	15	0	0	0	0	0	0	2	0	3	0	0	0	3	2
CUT_GIM_0039	CUT_GIM_0039	CUT_GIM_0039	222	90	139	135	248	250	1852	364	344	848	8	509	22	51	34	231	169	291	16	46	65	94	199	320	238	154	138	92	251	221	160	152	156	209	109	237	78	89	89	114	156	183	61	116	143	84	164
CUT_GIM_0040	CUT_GIM_0040	CUT_GIM_0040	11	9	16	64	32	34	102	17	21	50	1	16	5	1	6	23	4	20	2	8	3	11	17	14	12	15	16	44	32	30	9	7	10	12	14	7	18	2	16	11	4	13	8	20	7	10	14
CUT_GIM_0041	CUT_GIM_0041	CUT_GIM_0041	0	2	0	2	0	1	64	25	33	2	0	4	0	0	0	1	1	1	0	0	0	0	0	3	0	3	0	1	0	1	6	10	15	0	0	2	0	0	0	0	1	1	0	0	0	0	0
CUT_GIM_0042	CUT_GIM_0042	CUT_GIM_0042	2	0	3	2	2	3	40	11	21	9	0	4	0	0	1	1	1	0	2	0	1	1	0	1	2	0	3	1	2	3	3	5	10	2	0	2	0	0	3	0	1	0	8	0	2	1	0
CUT_GIM_0043	CUT_GIM_0043	CUT_GIM_0043	0	1	0	1	0	0	22	26	27	2	0	2	0	0	0	2	0	1	0	0	0	0	0	0	0	2	0	1	0	0	2	11	12	0	0	1	0	0	0	1	0	1	0	0	0	0	0
CUT_GIM_0044	CUT_GIM_0044	CUT_GIM_0044	17	3	6	9	29	20	210	58	48	29	0	11	1	0	0	8	20	27	0	1	2	4	17	12	18	5	6	6	29	18	18	24	22	7	0	5	4	0	0	4	18	17	0	3	4	4	14
CUT_GIM_0045	CUT_GIM_0045	CUT_GIM_0045	0	1	0	2	1	0	12	17	12	2	0	3	0	2	0	0	0	0	1	0	1	3	2	0	0	2	0	1	1	0	1	7	5	0	0	1	0	3	0	0	0	0	4	0	2	3	2
CUT_GIM_0046	CUT_GIM_0046	CUT_GIM_0046	80	12	44	397	907	1324	1012	126	116	331	1	55	39	124	108	275	149	236	33	139	177	181	163	292	86	21	44	270	917	1170	87	52	53	82	14	26	138	216	283	135	137	148	127	350	389	161	134
CUT_GIM_0047	CUT_GIM_0047	CUT_GIM_0047	43	11	54	27	33	19	896	195	203	217	5	167	8	18	9	135	29	42	12	19	23	47	55	109	46	19	54	18	33	17	77	81	92	53	68	78	28	31	24	66	27	26	46	48	51	42	45
CUT_GIM_0048	CUT_GIM_0048	CUT_GIM_0048	0	0	1	0	0	0	6	16	9	1	0	0	0	2	0	0	0	0	0	0	1	0	0	0	0	0	1	0	0	0	1	7	4	0	0	0	0	3	0	0	0	0	0	0	2	0	0
CUT_GIM_0049	CUT_GIM_0049	CUT_GIM_0049	0	0	0	0	0	0	2	0	0	0	0	0	0	0	0	0	0	0	0	0	0	0	0	0	0	0	0	0	0	0	0	0	0	0	0	0	0	0	0	0	0	0	0	0	0	0	0
CUT_GIM_0050	CUT_GIM_0050	CUT_GIM_0050	0	0	1	0	0	1	6	3	5	2	0	1	0	1	0	0	0	0	0	0	0	0	1	0	0	0	1	0	0	1	1	1	2	0	0	0	0	2	0	0	0	0	0	0	0	0	1
CUT_GIM_0051	CUT_GIM_0051	CUT_GIM_0051	19	6	23	6	14	13	204	29	36	48	0	13	1	6	4	36	20	29	2	5	15	20	28	36	20	10	23	4	14	11	18	12	16	12	0	6	4	10	10	18	18	18	8	13	33	18	23
CUT_GIM_0052	CUT_GIM_0052	CUT_GIM_0052	2	4	6	3	0	1	144	90	126	6	0	3	2	0	2	12	2	1	0	1	1	1	1	8	2	7	6	2	0	1	12	37	57	1	0	1	7	0	5	6	2	1	0	3	2	1	1
CUT_GIM_0053	CUT_GIM_0053	CUT_GIM_0053	0	1	0	0	0	0	4	7	5	0	0	0	0	0	0	0	0	1	0	0	0	0	0	1	0	2	0	0	0	0	0	3	2	0	0	0	0	0	0	0	0	1	0	0	0	0	0
CUT_GIM_0054	CUT_GIM_0054	CUT_GIM_0054	0	3	2	2	0	0	46	41	56	2	0	2	0	0	0	2	0	1	0	0	1	0	0	2	0	5	2	1	0	0	4	17	25	0	0	1	0	0	0	1	0	1	0	0	2	0	0
CUT_GIM_0055	CUT_GIM_0055	CUT_GIM_0055	10	1	3	5	7	2	102	33	38	29	0	24	6	5	1	22	13	14	5	5	2	14	14	23	11	2	3	3	7	2	9	14	17	7	0	11	21	9	3	11	12	9	19	13	4	12	12
CUT_GIM_0056	CUT_GIM_0056	CUT_GIM_0056	25	2	21	26	27	43	310	36	34	199	0	43	8	25	21	94	59	113	2	19	16	60	58	113	27	3	21	18	27	38	27	15	15	49	0	20	28	44	55	46	54	71	8	48	35	53	48
CUT_GIM_0057	CUT_GIM_0057	CUT_GIM_0057	0	0	0	0	0	0	6	3	4	0	0	0	0	0	0	2	0	0	0	0	0	0	0	1	0	0	0	0	0	0	1	1	2	0	0	0	0	0	0	1	0	0	0	0	0	0	0
CUT_GIM_0058	CUT_GIM_0058	CUT_GIM_0058	4	0	2	6	4	6	38	5	9	5	0	7	2	3	0	2	3	1	0	1	2	0	4	5	4	0	2	4	4	5	3	2	4	1	0	3	7	5	0	1	3	1	0	3	4	0	3
CUT_GIM_0059	CUT_GIM_0059	CUT_GIM_0059	40	9	51	24	27	16	826	179	185	201	5	152	8	17	9	131	26	39	12	15	21	42	53	105	43	15	51	16	27	14	71	75	84	50	68	71	28	30	24	64	24	25	46	38	46	37	44
CUT_GIM_0060	CUT_GIM_0060	CUT_GIM_0060	0	0	1	2	0	0	36	19	11	0	0	2	0	1	0	0	0	0	0	0	0	0	0	0	0	0	1	1	0	0	3	8	5	0	0	1	0	2	0	0	0	0	0	0	0	0	0
CUT_GIM_0061	CUT_GIM_0061	CUT_GIM_0061	2	0	4	2	2	3	66	16	24	9	0	4	0	0	1	2	1	0	2	1	2	1	0	1	2	0	4	1	2	3	6	7	11	2	0	2	0	0	3	1	1	0	8	3	4	1	0
CUT_GIM_0062	CUT_GIM_0062	CUT_GIM_0062	302	49	112	307	450	587	6602	661	543	1394	6	385	96	290	160	844	429	516	63	231	294	420	417	674	324	84	111	209	455	519	569	275	247	344	82	180	341	505	419	415	396	324	242	581	647	373	344
CUT_GIM_0063	CUT_GIM_0063	CUT_GIM_0063	0	1	1	0	0	0	20	22	32	2	0	0	0	0	0	4	0	0	0	0	1	1	0	4	0	2	1	0	0	0	2	9	15	0	0	0	0	0	0	2	0	0	0	0	2	1	0
CUT_GIM_0064	CUT_GIM_0064	CUT_GIM_0064	2	3	3	14	4	5	352	93	55	21	0	14	3	3	4	14	9	5	0	2	3	3	5	10	2	5	3	10	4	4	30	39	25	5	0	7	11	5	10	7	8	3	0	5	7	3	4
CUT_GIM_0065	CUT_GIM_0065	CUT_GIM_0065	1	1	3	5	5	4	58	18	16	10	0	7	1	1	1	1	1	2	1	0	1	2	1	3	1	2	3	3	5	4	5	7	7	2	0	3	4	2	3	0	1	1	4	0	2	2	1
CUT_GIM_0066	CUT_GIM_0066	CUT_GIM_0066	19	9	21	25	31	17	634	136	141	85	1	49	5	9	7	51	27	45	9	7	10	22	29	38	20	15	21	17	31	15	55	57	64	21	14	23	18	16	18	25	25	28	35	18	22	20	24
CUT_GIM_0067	CUT_GIM_0067	CUT_GIM_0067	4	1	3	13	8	9	128	10	18	10	0	16	2	8	0	6	4	2	0	1	3	1	4	9	4	2	3	9	8	8	11	4	8	2	0	7	7	14	0	3	4	1	0	3	7	1	3
CUT_GIM_0068	CUT_GIM_0068	CUT_GIM_0068	1	1	1	4	4	0	102	28	15	9	0	6	1	2	0	5	0	4	2	1	0	4	1	4	1	2	1	3	4	0	9	12	7	2	0	3	4	3	0	2	0	3	8	3	0	4	1
CUT_GIM_0069	CUT_GIM_0069	CUT_GIM_0069	6	3	10	7	6	11	118	63	34	33	0	5	5	8	4	29	15	32	4	10	9	21	15	38	6	5	10	5	6	10	10	26	15	8	0	2	18	14	10	14	14	20	15	25	20	19	12
CUT_GIM_0070	CUT_GIM_0070	CUT_GIM_0070	15	3	12	35	35	45	246	52	33	58	0	17	6	6	8	65	22	30	2	8	14	26	36	37	16	5	12	24	35	40	21	22	15	14	0	8	21	10	21	32	20	19	8	20	31	23	30
CUT_GIM_0071	CUT_GIM_0071	CUT_GIM_0071	12	2	13	142	151	146	412	62	45	52	0	21	11	23	16	77	35	38	9	8	19	44	33	52	13	3	13	97	153	129	36	26	20	13	0	10	39	40	42	38	32	24	35	20	42	39	27
CUT_GIM_0072	CUT_GIM_0072	CUT_GIM_0072	0	0	1	2	0	0	40	21	14	0	0	2	0	1	0	0	0	0	0	0	0	0	0	0	0	0	1	1	0	0	3	9	6	0	0	1	0	2	0	0	0	0	0	0	0	0	0
CUT_GIM_0073	CUT_GIM_0073	CUT_GIM_0073	35	7	36	73	48	39	1010	84	98	351	7	203	12	33	27	126	44	93	14	24	21	56	55	97	38	12	36	50	49	34	87	35	45	87	96	95	43	57	71	62	41	58	54	60	46	50	45
CUT_GIM_0074	CUT_GIM_0074	CUT_GIM_0074	0	0	0	4	5	2	10	8	8	5	0	3	0	1	1	3	0	1	0	0	0	0	3	2	0	0	0	3	5	2	1	3	4	1	0	1	0	2	3	1	0	1	0	0	0	0	2
CUT_GIM_0075	CUT_GIM_0075	CUT_GIM_0075	134	14	52	152	213	326	1692	177	140	607	1	118	0	84	75	31	211	310	2	71	96	16	225	342	144	24	52	104	215	288	146	74	64	150	14	55	0	146	196	15	195	195	8	179	211	14	186
CUT_GIM_0076	CUT_GIM_0076	CUT_GIM_0076	0	0	0	1	0	1	2	4	3	0	0	2	0	0	0	1	0	1	0	0	0	0	0	1	0	0	0	1	0	1	0	2	1	0	0	1	0	0	0	0	0	1	0	0	0	0	0
CUT_GIM_0077	CUT_GIM_0077	CUT_GIM_0077	1	1	4	9	0	3	86	32	45	6	0	18	0	0	1	2	4	1	0	0	0	2	1	10	1	2	4	6	0	3	7	13	20	1	0	8	0	0	3	1	4	1	0	0	0	2	1
CUT_GIM_0078	CUT_GIM_0078	CUT_GIM_0078	0	0	1	1	0	0	6	5	5	2	0	3	0	0	0	0	0	1	0	0	0	1	1	1	0	0	1	1	0	0	1	2	2	0	0	1	0	0	0	0	0	1	0	0	0	1	1
CUT_GIM_0079	CUT_GIM_0079	CUT_GIM_0079	0	3	3	1	1	0	64	30	43	3	0	4	0	1	0	6	0	0	0	1	0	0	2	2	0	5	3	1	1	0	6	12	20	1	0	2	0	2	0	3	0	0	0	3	0	0	2
CUT_GIM_0080	CUT_GIM_0080	CUT_GIM_0080	4	1	4	3	3	4	84	25	24	22	0	16	1	3	1	4	1	1	1	1	0	1	2	6	4	2	4	2	3	4	7	10	11	5	0	7	4	5	3	2	1	1	4	3	0	1	2
CUT_GIM_0081	CUT_GIM_0081	CUT_GIM_0081	2	3	2	1	3	8	52	36	41	12	0	7	0	3	4	7	3	10	2	2	1	5	4	9	2	5	2	1	3	7	4	15	19	3	0	3	0	5	10	3	3	6	8	5	2	4	3
CUT_GIM_0082	CUT_GIM_0082	CUT_GIM_0082	7	3	3	9	5	9	196	47	54	27	0	13	4	1	2	7	7	9	1	1	1	7	3	12	8	5	3	6	5	8	17	20	25	7	0	6	14	2	5	3	6	6	4	3	2	6	2
CUT_GIM_0083	CUT_GIM_0083	CUT_GIM_0083	4	0	4	4	4	1	138	23	39	14	0	2	0	1	2	5	3	7	0	1	0	4	3	3	4	0	4	3	4	1	12	10	18	3	0	1	0	2	5	2	3	4	0	3	0	4	2
CUT_GIM_0084	CUT_GIM_0084	CUT_GIM_0084	2	0	2	2	2	2	34	14	16	4	0	7	0	0	1	5	1	1	0	0	1	2	1	0	2	0	2	1	2	2	3	6	7	1	0	3	0	0	3	2	1	1	0	0	2	2	1
CUT_GIM_0085	CUT_GIM_0085	CUT_GIM_0085	0	1	5	2	1	0	18	50	43	2	0	0	0	0	1	1	1	0	0	0	1	1	0	2	0	2	5	1	1	0	2	21	20	0	0	0	0	0	3	0	1	0	0	0	2	1	0
CUT_GIM_0086	CUT_GIM_0086	CUT_GIM_0086	2	5	2	2	3	10	56	39	42	14	0	8	1	3	4	11	4	12	2	2	3	6	4	10	2	9	2	1	3	9	5	16	19	3	0	4	4	5	10	5	4	8	8	5	7	5	3
CUT_GIM_0087	CUT_GIM_0087	CUT_GIM_0087	1	0	0	3	0	0	22	9	20	1	0	1	0	1	0	1	0	2	1	0	0	3	0	1	1	0	0	2	0	0	2	4	9	0	0	0	0	2	0	0	0	1	4	0	0	3	0
CUT_GIM_0088	CUT_GIM_0088	CUT_GIM_0088	0	0	0	1	0	0	8	3	3	1	0	1	0	0	0	2	1	2	0	0	0	0	0	0	0	0	0	1	0	0	1	1	1	0	0	0	0	0	0	1	1	1	0	0	0	0	0
CUT_GIM_0089	CUT_GIM_0089	CUT_GIM_0089	6	2	12	5	2	4	194	24	21	38	1	29	1	1	0	7	0	4	3	0	1	1	2	3	6	3	12	3	2	4	17	10	10	9	14	14	4	2	0	3	0	3	12	0	2	1	2
CUT_GIM_0090	CUT_GIM_0090	CUT_GIM_0090	0	0	0	2	0	0	16	4	4	6	0	5	1	0	0	1	1	0	0	1	1	0	0	0	0	0	0	1	0	0	1	2	2	1	0	2	4	0	0	0	1	0	0	3	2	0	0
CUT_GIM_0091	CUT_GIM_0091	CUT_GIM_0091	0	0	0	1	0	0	6	14	5	1	0	0	0	0	0	0	0	0	0	0	1	0	0	1	0	0	0	1	0	0	1	6	2	0	0	0	0	0	0	0	0	0	0	0	2	0	0
CUT_GIM_0092	CUT_GIM_0092	CUT_GIM_0092	0	0	0	1	0	0	22	6	9	0	0	2	0	0	0	2	0	1	2	0	0	0	1	1	0	0	0	1	0	0	2	2	4	0	0	1	0	0	0	1	0	1	8	0	0	0	1
CUT_GIM_0093	CUT_GIM_0093	CUT_GIM_0093	5	3	5	34	37	31	202	41	55	25	0	19	12	9	12	36	14	30	7	10	8	16	12	29	5	5	5	23	37	27	17	17	25	6	0	9	43	16	31	18	13	19	27	25	18	14	10
CUT_GIM_0094	CUT_GIM_0094	CUT_GIM_0094	9	7	8	28	13	37	400	109	106	30	1	20	4	9	5	14	6	14	3	9	5	8	15	21	10	12	8	19	13	33	34	45	48	7	14	9	14	16	13	7	6	9	12	23	11	7	12
CUT_GIM_0095	CUT_GIM_0095	CUT_GIM_0095	0	0	0	0	0	0	8	6	8	0	0	0	0	0	0	0	1	1	0	0	0	0	0	1	0	0	0	0	0	0	1	2	4	0	0	0	0	0	0	0	1	1	0	0	0	0	0
CUT_GIM_0096	CUT_GIM_0096	CUT_GIM_0096	4	0	2	7	2	4	96	16	19	19	0	26	1	1	2	6	4	8	0	2	4	4	6	7	4	0	2	5	2	4	8	7	9	5	0	12	4	2	5	3	4	5	0	5	9	4	5
CUT_GIM_0097	CUT_GIM_0097	CUT_GIM_0097	0	0	1	2	0	1	28	13	18	2	0	1	0	0	0	1	2	1	0	0	0	0	3	2	0	0	1	1	0	1	2	5	8	0	0	0	0	0	0	0	2	1	0	0	0	0	2
CUT_GIM_0098	CUT_GIM_0098	CUT_GIM_0098	1	2	0	3	2	4	22	12	7	4	0	7	0	1	0	3	3	0	0	1	0	2	5	2	1	3	0	2	2	4	2	5	3	1	0	3	0	2	0	1	3	0	0	3	0	2	4
CUT_GIM_0099	CUT_GIM_0099	CUT_GIM_0099	16	11	25	41	21	15	206	63	42	57	1	25	10	20	11	43	31	46	10	7	11	22	23	51	17	19	25	28	21	13	18	26	19	14	14	12	35	35	29	21	29	29	38	18	24	20	19
CUT_GIM_0100	CUT_GIM_0100	CUT_GIM_0100	0	0	0	1	0	1	2	4	3	0	0	2	0	0	0	1	0	1	0	0	0	0	0	1	0	0	0	1	0	1	0	2	1	0	0	1	0	0	0	0	0	1	0	0	0	0	0
CUT_GIM_0101	CUT_GIM_0101	CUT_GIM_0101	2	3	8	5	1	6	150	65	84	14	0	6	3	2	4	15	5	5	2	2	3	12	4	9	2	5	8	3	1	5	13	27	38	3	0	3	11	3	10	7	5	3	8	5	7	11	3
CUT_GIM_0102	CUT_GIM_0102	CUT_GIM_0102	40	16	29	21	38	39	200	59	75	101	0	26	4	14	3	31	20	40	3	9	14	26	33	47	43	27	29	14	38	34	17	25	34	25	0	12	14	24	8	15	18	25	12	23	31	23	27
CUT_GIM_0103	CUT_GIM_0103	CUT_GIM_0103	0	0	2	2	2	0	10	7	14	0	0	0	0	0	2	1	1	0	0	0	0	0	0	0	0	0	2	1	2	0	1	3	6	0	0	0	0	0	5	0	1	0	0	0	0	0	0
CUT_GIM_0104	CUT_GIM_0104	CUT_GIM_0104	0	1	0	0	0	1	12	9	22	0	0	0	0	0	0	1	0	0	0	0	0	0	0	1	0	2	0	0	0	1	1	4	10	0	0	0	0	0	0	0	0	0	0	0	0	0	0
CUT_GIM_0105	CUT_GIM_0105	CUT_GIM_0105	171	62	175	430	1151	1072	4716	678	414	408	4	277	33	41	37	152	78	121	16	38	44	85	131	135	183	106	174	293	1164	948	407	282	188	101	55	129	117	71	97	75	72	76	61	96	97	76	108
CUT_GIM_0106	CUT_GIM_0106	CUT_GIM_0106	3	1	3	4	2	4	76	9	10	7	0	7	0	0	0	4	0	0	1	0	1	1	0	0	3	2	3	3	2	4	7	4	5	2	0	3	0	0	0	2	0	0	4	0	2	1	0
CUT_GIM_0107	CUT_GIM_0107	CUT_GIM_0107	2	0	2	1	1	2	42	14	25	5	0	2	0	0	1	4	0	5	0	0	0	2	3	5	2	0	2	1	1	2	4	6	11	1	0	1	0	0	3	2	0	3	0	0	0	2	2
CUT_GIM_0108	CUT_GIM_0108	CUT_GIM_0108	0	0	0	1	0	2	12	6	5	0	0	0	0	1	0	1	1	0	0	0	0	1	0	0	0	0	0	1	0	2	1	2	2	0	0	0	0	2	0	0	1	0	0	0	0	1	0
CUT_GIM_0109	CUT_GIM_0109	CUT_GIM_0109	0	0	2	2	2	0	8	7	14	0	0	0	0	0	2	1	1	0	0	0	0	0	0	0	0	0	2	1	2	0	1	3	6	0	0	0	0	0	5	0	1	0	0	0	0	0	0
CUT_GIM_0110	CUT_GIM_0110	CUT_GIM_0110	0	1	3	3	1	2	62	14	13	13	0	12	0	1	0	0	2	1	0	2	1	1	3	5	0	2	3	2	1	2	5	6	6	3	0	6	0	2	0	0	2	1	0	5	2	1	2
CUT_GIM_0111	CUT_GIM_0111	CUT_GIM_0111	0	1	2	5	3	5	48	10	7	8	0	5	0	0	1	2	1	3	0	0	1	0	1	4	0	2	2	3	3	4	4	4	3	2	0	2	0	0	3	1	1	2	0	0	2	0	1
CUT_GIM_0112	CUT_GIM_0112	CUT_GIM_0112	0	1	2	0	0	0	22	40	44	0	0	0	0	0	0	3	0	0	0	1	0	0	0	2	0	2	2	0	0	0	2	17	20	0	0	0	0	0	0	1	0	0	0	3	0	0	0
CUT_GIM_0113	CUT_GIM_0113	CUT_GIM_0113	1	2	3	1	0	0	42	30	33	5	0	0	0	1	2	6	3	1	0	2	0	1	1	2	1	3	3	1	0	0	4	12	15	1	0	0	0	2	5	3	3	1	0	5	0	1	1
CUT_GIM_0114	CUT_GIM_0114	CUT_GIM_0114	1	2	7	33	18	9	212	81	55	9	0	6	0	1	1	5	5	2	1	2	2	5	1	8	1	3	7	22	18	8	18	34	25	2	0	3	0	2	3	2	5	1	4	5	4	4	1
CUT_GIM_0115	CUT_GIM_0115	CUT_GIM_0115	0	0	0	0	0	0	14	7	7	1	0	0	0	0	0	3	0	0	0	0	0	0	0	1	0	0	0	0	0	0	1	3	3	0	0	0	0	0	0	1	0	0	0	0	0	0	0
CUT_GIM_0116	CUT_GIM_0116	CUT_GIM_0116	1	1	0	1	0	1	22	8	28	5	0	1	0	0	0	8	1	0	1	0	1	1	1	1	1	2	0	1	0	1	2	3	13	1	0	0	0	0	0	4	1	0	4	0	2	1	1
CUT_GIM_0117	CUT_GIM_0117	CUT_GIM_0117	28	16	42	16	18	23	526	89	128	238	4	259	4	11	9	89	47	83	3	8	13	58	80	114	30	27	42	11	18	20	45	37	58	59	55	121	14	19	24	44	43	52	12	20	29	52	66
CUT_GIM_0118	CUT_GIM_0118	CUT_GIM_0118	2	2	2	5	5	4	156	55	55	10	0	4	0	0	1	7	3	2	0	1	2	1	3	2	2	3	2	3	5	4	13	23	25	2	0	2	0	0	3	3	3	1	0	3	4	1	2
CUT_GIM_0119	CUT_GIM_0119	CUT_GIM_0119	1288	497	1013	1010	1257	1096	13724	3047	2750	4537	61	1790	154	394	307	1174	1094	1789	115	340	311	699	1255	1671	1381	849	1008	688	1271	969	1183	1269	1250	1118	833	835	546	686	804	577	1009	1124	442	855	684	621	1035
CUT_GIM_0120	CUT_GIM_0120	CUT_GIM_0120	2	0	1	3	1	1	64	13	12	6	0	3	0	1	1	3	2	2	0	3	3	1	3	3	2	0	1	2	1	1	6	5	5	1	0	1	0	2	3	1	2	1	0	8	7	1	2
CUT_GIM_0121	CUT_GIM_0121	CUT_GIM_0121	6	5	2	6	1	3	156	25	50	9	0	68	0	1	0	5	3	1	1	0	0	1	2	4	6	9	2	4	1	3	13	10	23	2	0	32	0	2	0	2	3	1	4	0	0	1	2
CUT_GIM_0122	CUT_GIM_0122	CUT_GIM_0122	0	1	0	5	3	2	40	10	9	12	1	18	5	9	2	17	5	6	3	5	4	8	6	6	0	2	0	3	3	2	3	4	4	3	14	8	18	16	5	8	5	4	12	13	9	7	5
CUT_GIM_0123	CUT_GIM_0123	CUT_GIM_0123	1	1	2	1	1	1	92	32	50	6	0	2	0	0	1	5	2	5	1	0	0	3	2	1	1	2	2	1	1	1	8	13	23	1	0	1	0	0	3	2	2	3	4	0	0	3	2
CUT_GIM_0124	CUT_GIM_0124	CUT_GIM_0124	52	6	14	29	36	73	208	26	19	200	0	36	7	17	16	119	81	107	10	7	13	75	71	101	56	10	14	20	36	65	18	11	9	49	0	17	25	30	42	58	75	67	38	18	29	67	59
CUT_GIM_0125	CUT_GIM_0125	CUT_GIM_0125	276	91	246	278	602	715	1734	248	238	918	5	326	41	194	147	769	637	1128	31	169	176	375	743	1068	296	155	245	189	609	632	149	103	108	226	68	152	145	338	385	378	588	709	119	425	387	333	613
CUT_GIM_0126	CUT_GIM_0126	CUT_GIM_0126	0	2	2	1	0	0	48	9	19	0	0	1	1	1	0	3	2	0	0	1	0	0	1	0	0	3	2	1	0	0	4	4	9	0	0	0	4	2	0	1	2	0	0	3	0	0	1
CUT_GIM_0127	CUT_GIM_0127	CUT_GIM_0127	0	0	1	0	1	0	26	16	15	0	0	0	0	0	0	1	0	1	0	1	0	0	1	3	0	0	1	0	1	0	2	7	7	0	0	0	0	0	0	0	0	1	0	3	0	0	1
CUT_GIM_0128	CUT_GIM_0128	CUT_GIM_0128	1	0	2	3	6	6	64	14	19	19	0	6	0	5	3	20	7	17	1	2	5	15	5	15	1	0	2	2	6	5	6	6	9	5	0	3	0	9	8	10	6	11	4	5	11	13	4
CUT_GIM_0129	CUT_GIM_0129	CUT_GIM_0129	2	2	3	6	5	4	162	59	69	10	0	5	0	0	1	7	3	2	1	1	2	1	3	2	2	3	3	4	5	4	14	25	31	2	0	2	0	0	3	3	3	1	4	3	4	1	2
CUT_GIM_0130	CUT_GIM_0130	CUT_GIM_0130	0	1	2	3	0	4	8	3	4	7	0	0	0	0	0	1	0	1	0	0	0	1	1	1	0	2	2	2	0	4	1	1	2	2	0	0	0	0	0	0	0	1	0	0	0	1	1
CUT_GIM_0131	CUT_GIM_0131	CUT_GIM_0131	1	0	0	2	2	0	12	6	1	2	0	0	0	0	0	1	0	1	0	0	0	2	0	0	1	0	0	1	2	0	1	2	0	0	0	0	0	0	0	0	0	1	0	0	0	2	0
CUT_GIM_0132	CUT_GIM_0132	CUT_GIM_0132	0	1	2	0	0	0	42	10	10	3	0	0	0	1	0	3	1	6	1	0	1	3	0	3	0	2	2	0	0	0	4	4	5	1	0	0	0	2	0	1	1	4	4	0	2	3	0
CUT_GIM_0133	CUT_GIM_0133	CUT_GIM_0133	33	15	33	22	24	24	290	53	49	139	0	73	5	17	12	64	28	63	4	7	14	45	28	54	35	26	33	15	24	21	25	22	22	34	0	34	18	30	31	31	26	40	15	18	31	40	23
CUT_GIM_0134	CUT_GIM_0134	CUT_GIM_0134	2	2	3	2	6	3	92	27	14	10	0	3	0	2	1	5	2	1	1	4	0	2	2	6	2	3	3	1	6	3	8	11	6	2	0	1	0	3	3	2	2	1	4	10	0	2	2
CUT_GIM_0135	CUT_GIM_0135	CUT_GIM_0135	1	0	1	3	1	5	80	9	12	24	0	9	0	3	1	6	5	5	0	2	2	3	4	4	1	0	1	2	1	4	7	4	5	6	0	4	0	5	3	3	5	3	0	5	4	3	3
CUT_GIM_0136	CUT_GIM_0136	CUT_GIM_0136	0	0	0	0	0	0	20	8	6	0	0	0	0	0	0	1	0	0	0	1	1	0	0	1	0	0	0	0	0	0	2	3	3	0	0	0	0	0	0	0	0	0	0	3	2	0	0
CUT_GIM_0137	CUT_GIM_0137	CUT_GIM_0137	74	12	53	45	82	83	786	135	149	269	1	116	4	27	10	80	41	101	2	22	21	40	76	93	79	21	53	31	83	73	68	56	68	66	14	54	14	47	26	39	38	63	8	55	46	36	63
CUT_GIM_0138	CUT_GIM_0138	CUT_GIM_0138	477	49	198	114	321	407	1762	135	166	1266	0	431	36	123	83	863	453	791	23	96	117	270	600	966	512	84	197	78	325	360	152	56	75	312	0	201	128	214	217	424	418	497	88	241	257	240	495
CUT_GIM_0139	CUT_GIM_0139	CUT_GIM_0139	251	44	152	184	397	492	866	133	142	1005	3	474	22	85	70	509	354	562	26	62	74	277	422	662	269	75	151	125	402	435	75	55	65	248	41	221	78	148	183	250	327	353	100	156	163	246	348
CUT_GIM_0140	CUT_GIM_0140	CUT_GIM_0140	0	1	1	1	0	0	80	20	34	4	0	1	0	0	0	1	1	3	0	0	0	2	2	2	0	2	1	1	0	0	7	8	15	1	0	0	0	0	0	0	1	2	0	0	0	2	2
CUT_GIM_0141	CUT_GIM_0141	CUT_GIM_0141	18	11	22	306	311	274	784	166	139	141	2	63	9	19	11	90	54	73	11	15	19	46	56	83	19	19	22	208	315	242	68	69	63	35	27	29	32	33	29	44	50	46	42	38	42	41	46
CUT_GIM_0142	CUT_GIM_0142	CUT_GIM_0142	7	4	9	22	14	15	328	46	49	69	3	16	8	13	7	26	17	15	4	2	4	23	8	26	8	7	9	15	14	13	28	19	22	17	41	7	28	23	18	13	16	9	15	5	9	20	7
CUT_GIM_0143	CUT_GIM_0143	CUT_GIM_0143	6	2	6	11	8	14	268	46	58	41	0	17	1	3	1	14	8	8	3	1	6	6	3	10	6	3	6	7	8	12	23	19	26	10	0	8	4	5	3	7	7	5	12	3	13	5	2
CUT_GIM_0144	CUT_GIM_0144	CUT_GIM_0144	3	0	7	4	1	2	156	30	14	15	0	11	1	2	0	5	0	6	1	0	0	1	1	6	3	0	7	3	1	2	13	12	6	4	0	5	4	3	0	2	0	4	4	0	0	1	1
CUT_GIM_0145	CUT_GIM_0145	CUT_GIM_0145	123	76	150	129	107	99	3390	570	393	573	10	399	19	65	50	207	186	331	23	43	55	106	254	360	132	130	149	88	108	88	292	237	179	141	137	186	67	113	131	102	172	208	88	108	121	94	209
CUT_GIM_0146	CUT_GIM_0146	CUT_GIM_0146	0	0	1	0	1	0	30	16	17	0	0	0	0	0	0	2	0	1	0	1	0	0	1	3	0	0	1	0	1	0	3	7	8	0	0	0	0	0	0	1	0	1	0	3	0	0	1
CUT_GIM_0147	CUT_GIM_0147	CUT_GIM_0147	0	0	3	2	3	1	42	11	18	1	0	3	0	0	0	3	3	1	0	0	3	1	2	2	0	0	3	1	3	1	4	5	8	0	0	1	0	0	0	1	3	1	0	0	7	1	2
CUT_GIM_0148	CUT_GIM_0148	CUT_GIM_0148	0	0	1	0	0	0	6	4	2	0	0	0	0	0	0	1	0	0	1	0	0	0	1	0	0	0	1	0	0	0	1	2	1	0	0	0	0	0	0	0	0	0	4	0	0	0	1
CUT_GIM_0149	CUT_GIM_0149	CUT_GIM_0149	0	0	0	0	0	1	0	0	6	1	0	1	0	0	0	0	0	0	1	0	0	0	1	0	0	0	0	0	0	1	0	0	3	0	0	0	0	0	0	0	0	0	4	0	0	0	1
CUT_GIM_0150	CUT_GIM_0150	CUT_GIM_0150	37	7	25	21	20	43	822	167	157	249	1	135	7	13	11	111	33	76	13	18	24	52	90	103	40	12	25	14	20	38	71	70	71	61	14	63	25	23	29	55	30	48	50	45	53	46	74
CUT_GIM_0151	CUT_GIM_0151	CUT_GIM_0151	6	6	2	53	16	20	138	15	25	51	2	18	2	8	8	17	8	12	2	3	4	9	9	11	6	10	2	36	16	18	12	6	11	13	27	8	7	14	21	8	7	8	8	8	9	8	7
CUT_GIM_0152	CUT_GIM_0152	CUT_GIM_0152	9	11	18	38	43	52	816	186	163	141	2	64	7	15	8	46	20	40	8	10	13	17	26	54	10	19	18	26	43	46	70	77	74	35	27	30	25	26	21	23	18	25	31	25	29	15	21
CUT_GIM_0153	CUT_GIM_0153	CUT_GIM_0153	0	1	0	0	0	0	0	3	5	0	0	0	0	0	0	1	1	0	0	0	0	0	0	0	0	2	0	0	0	0	0	1	2	0	0	0	0	0	0	0	1	0	0	0	0	0	0
CUT_GIM_0154	CUT_GIM_0154	CUT_GIM_0154	1	2	0	0	0	0	42	14	14	0	0	1	0	0	0	1	0	0	0	0	0	0	0	0	1	3	0	0	0	0	4	6	6	0	0	0	0	0	0	0	0	0	0	0	0	0	0
CUT_GIM_0155	CUT_GIM_0155	CUT_GIM_0155	1	1	0	1	1	0	196	27	11	1	0	3	0	0	0	2	1	2	0	1	0	1	0	0	1	2	0	1	1	0	17	11	5	0	0	1	0	0	0	1	1	1	0	3	0	1	0
CUT_GIM_0156	CUT_GIM_0156	CUT_GIM_0156	0	1	1	2	1	0	14	20	30	0	0	2	0	1	0	2	1	1	0	0	1	1	2	1	0	2	1	1	1	0	1	8	14	0	0	1	0	2	0	1	1	1	0	0	2	1	2
CUT_GIM_0157	CUT_GIM_0157	CUT_GIM_0157	0	1	0	0	0	3	10	4	7	1	0	0	0	1	1	2	0	2	0	0	0	1	1	0	0	2	0	0	0	3	1	2	3	0	0	0	0	2	3	1	0	1	0	0	0	1	1
CUT_GIM_0158	CUT_GIM_0158	CUT_GIM_0158	0	0	0	2	1	0	16	11	13	1	0	0	0	0	0	1	1	0	0	1	0	0	0	1	0	0	0	1	1	0	1	5	6	0	0	0	0	0	0	0	1	0	0	3	0	0	0
CUT_GIM_0159	CUT_GIM_0159	CUT_GIM_0159	197	23	55	166	86	127	810	84	74	470	1	143	38	92	65	356	179	197	43	30	63	205	135	249	211	39	55	113	87	112	70	35	34	116	14	67	135	160	170	175	165	124	165	75	139	182	111
CUT_GIM_0160	CUT_GIM_0160	CUT_GIM_0160	1	0	1	1	0	0	16	5	4	5	0	6	1	2	0	2	0	4	1	0	1	1	0	1	1	0	1	1	0	0	1	2	2	1	0	3	4	3	0	1	0	3	4	0	2	1	0
CUT_GIM_0161	CUT_GIM_0161	CUT_GIM_0161	2	2	3	6	1	0	128	27	21	9	0	3	0	0	2	0	0	4	1	1	2	1	0	2	2	3	3	4	1	0	11	11	10	2	0	1	0	0	5	0	0	3	4	3	4	1	0
CUT_GIM_0162	CUT_GIM_0162	CUT_GIM_0162	1	0	1	1	2	1	28	8	7	19	0	4	2	4	2	5	4	9	2	0	1	3	10	6	1	0	1	1	2	1	2	3	3	5	0	2	7	7	5	2	4	6	8	0	2	3	8
CUT_GIM_0163	CUT_GIM_0163	CUT_GIM_0163	10	4	12	14	19	13	218	64	58	36	0	11	1	3	2	14	7	5	0	6	2	6	4	10	11	7	12	10	19	11	19	27	26	9	0	5	4	5	5	7	6	3	0	15	4	5	3
CUT_GIM_0164	CUT_GIM_0164	CUT_GIM_0164	1	2	2	9	0	6	40	18	6	14	1	3	1	1	1	1	3	6	1	2	1	2	1	1	1	3	2	6	0	5	3	7	3	3	14	1	4	2	3	0	3	4	4	5	2	2	1
CUT_GIM_0165	CUT_GIM_0165	CUT_GIM_0165	0	0	0	0	0	2	18	8	10	3	0	2	1	1	0	1	1	1	0	0	0	2	2	3	0	0	0	0	0	2	2	3	5	1	0	1	4	2	0	0	1	1	0	0	0	2	2
CUT_GIM_0166	CUT_GIM_0166	CUT_GIM_0166	1	1	1	5	6	5	64	11	7	17	0	12	0	3	0	9	4	4	0	4	1	0	3	11	1	2	1	3	6	4	6	5	3	4	0	6	0	5	0	4	4	3	0	10	2	0	2
CUT_GIM_0167	CUT_GIM_0167	CUT_GIM_0167	0	1	0	1	0	4	38	19	36	2	0	0	0	2	1	3	0	2	0	0	0	3	1	1	0	2	0	1	0	4	3	8	16	0	0	0	0	3	3	1	0	1	0	0	0	3	1
CUT_GIM_0168	CUT_GIM_0168	CUT_GIM_0168	18	8	12	15	17	16	204	39	38	123	0	49	4	2	11	42	16	33	7	2	9	17	27	33	19	14	12	10	17	14	18	16	17	30	0	23	14	3	29	21	15	21	27	5	20	15	22
CUT_GIM_0169	CUT_GIM_0169	CUT_GIM_0169	17	6	12	37	34	40	474	61	76	102	2	49	11	11	7	67	24	33	5	9	10	31	25	56	18	10	12	25	34	35	41	25	35	25	27	23	39	19	18	33	22	21	19	23	22	28	21
CUT_GIM_0170	CUT_GIM_0170	CUT_GIM_0170	0	1	0	0	0	0	16	11	6	0	0	1	0	0	0	1	0	0	1	0	1	0	0	0	0	2	0	0	0	0	1	5	3	0	0	0	0	0	0	0	0	0	4	0	2	0	0
CUT_GIM_0171	CUT_GIM_0171	CUT_GIM_0171	1	0	2	12	10	9	88	30	30	14	0	6	0	4	1	11	2	5	1	3	3	6	3	6	1	0	2	8	10	8	8	12	14	3	0	3	0	7	3	5	2	3	4	8	7	5	2
CUT_GIM_0172	CUT_GIM_0172	CUT_GIM_0172	13	9	19	28	11	18	850	193	134	65	1	31	1	9	5	15	14	16	1	9	5	11	13	18	14	15	19	19	11	16	73	80	61	16	14	14	4	16	13	7	13	10	4	23	11	10	11
CUT_GIM_0173	CUT_GIM_0173	CUT_GIM_0173	22	10	10	15	15	13	186	32	30	92	0	15	4	4	8	45	37	78	1	7	10	21	51	80	24	17	10	10	15	11	16	13	14	23	0	7	14	7	21	22	34	49	4	18	22	19	42
CUT_GIM_0174	CUT_GIM_0174	CUT_GIM_0174	0	0	1	1	0	0	6	12	8	0	0	0	0	0	0	2	0	2	0	0	1	2	0	3	0	0	1	1	0	0	1	5	4	0	0	0	0	0	0	1	0	1	0	0	2	2	0
CUT_GIM_0175	CUT_GIM_0175	CUT_GIM_0175	2	0	0	1	0	2	32	11	19	6	0	0	0	0	0	2	2	2	1	0	0	2	1	6	2	0	0	1	0	2	3	5	9	1	0	0	0	0	0	1	2	1	4	0	0	2	1
CUT_GIM_0176	CUT_GIM_0176	CUT_GIM_0176	1	1	0	0	1	0	16	10	9	1	0	0	0	0	0	1	0	0	2	0	1	0	0	2	1	2	0	0	1	0	1	4	4	0	0	0	0	0	0	0	0	0	8	0	2	0	0
CUT_GIM_0177	CUT_GIM_0177	CUT_GIM_0177	2	1	1	3	3	7	140	33	36	18	0	3	3	3	0	11	7	7	0	5	1	3	4	9	2	2	1	2	3	6	12	14	16	4	0	1	11	5	0	5	6	4	0	13	2	3	3
CUT_GIM_0178	CUT_GIM_0178	CUT_GIM_0178	1	0	3	3	0	0	52	24	18	2	0	2	1	1	0	1	0	0	0	0	0	2	0	4	1	0	3	2	0	0	4	10	8	0	0	1	4	2	0	0	0	0	0	0	0	2	0
CUT_GIM_0179	CUT_GIM_0179	CUT_GIM_0179	0	0	1	0	0	0	8	6	9	0	0	0	0	0	0	1	0	0	0	0	0	0	0	0	0	0	1	0	0	0	1	2	4	0	0	0	0	0	0	0	0	0	0	0	0	0	0
CUT_GIM_0180	CUT_GIM_0180	CUT_GIM_0180	0	0	0	0	0	0	6	4	5	1	0	0	0	0	0	0	0	0	0	0	0	0	0	0	0	0	0	0	0	0	1	2	2	0	0	0	0	0	0	0	0	0	0	0	0	0	0
CUT_GIM_0181	CUT_GIM_0181	CUT_GIM_0181	16	10	13	86	64	61	598	175	157	85	1	83	8	11	12	53	19	31	6	5	23	25	29	42	17	17	13	59	65	54	52	73	71	21	14	39	28	19	31	26	18	19	23	13	51	22	24
CUT_GIM_0182	CUT_GIM_0182	CUT_GIM_0182	0	0	0	0	0	0	22	10	15	1	0	1	0	0	0	0	0	0	0	0	0	2	0	0	0	0	0	0	0	0	2	4	7	0	0	0	0	0	0	0	0	0	0	0	0	2	0
CUT_GIM_0183	CUT_GIM_0183	CUT_GIM_0183	1198	733	1462	1201	1399	1220	24806	5492	4652	4306	55	1631	160	478	314	1685	1371	2197	165	387	329	1034	1661	2154	1285	1252	1454	818	1415	1079	2138	2287	2114	1061	751	761	568	832	822	828	1265	1381	634	973	724	919	1370
CUT_GIM_0184	CUT_GIM_0184	CUT_GIM_0184	3	0	3	6	1	4	44	34	34	6	0	1	0	0	2	4	2	1	1	1	0	1	1	3	3	0	3	4	1	4	4	14	15	1	0	0	0	0	5	2	2	1	4	3	0	1	1
CUT_GIM_0185	CUT_GIM_0185	CUT_GIM_0185	0	0	0	0	0	0	2	7	7	0	0	0	0	0	0	1	0	2	0	0	0	0	1	0	0	0	0	0	0	0	0	3	3	0	0	0	0	0	0	0	0	1	0	0	0	0	1
CUT_GIM_0186	CUT_GIM_0186	CUT_GIM_0186	8	6	4	20	23	29	134	38	39	35	2	9	7	14	4	36	15	22	2	5	10	12	26	37	9	10	4	14	23	26	12	16	18	9	27	4	25	24	10	18	14	14	8	13	22	11	21
CUT_GIM_0187	CUT_GIM_0187	CUT_GIM_0187	0	0	1	0	0	0	32	7	7	2	0	1	0	0	0	0	0	0	0	0	0	3	1	1	0	0	1	0	0	0	3	3	3	0	0	0	0	0	0	0	0	0	0	0	0	3	1
CUT_GIM_0188	CUT_GIM_0188	CUT_GIM_0188	0	0	0	0	0	1	4	2	7	1	0	2	0	1	0	0	1	1	0	0	1	0	0	1	0	0	0	0	0	1	0	1	3	0	0	1	0	2	0	0	1	1	0	0	2	0	0
CUT_GIM_0189	CUT_GIM_0189	CUT_GIM_0189	18	7	8	12	7	13	306	57	44	50	0	22	4	7	6	34	10	16	3	9	2	25	12	22	19	12	8	8	7	11	26	24	20	12	0	10	14	12	16	17	9	10	12	23	4	22	10
CUT_GIM_0190	CUT_GIM_0190	CUT_GIM_0190	2	0	3	1	1	0	30	13	19	8	0	10	0	2	1	2	0	0	0	0	2	4	0	5	2	0	3	1	1	0	3	5	9	2	0	5	0	3	3	1	0	0	0	0	4	4	0
CUT_GIM_0191	CUT_GIM_0191	CUT_GIM_0191	16	9	13	85	63	61	584	155	132	85	1	83	8	11	12	52	19	29	5	5	22	24	29	40	17	15	13	58	64	54	50	65	60	21	14	39	28	19	31	26	18	18	19	13	48	21	24
CUT_GIM_0192	CUT_GIM_0192	CUT_GIM_0192	4	3	4	25	18	19	234	28	49	57	0	26	1	6	3	28	13	11	3	3	1	9	10	23	4	5	4	17	18	17	20	12	22	14	0	12	4	10	8	14	12	7	12	8	2	8	8
CUT_GIM_0193	CUT_GIM_0193	CUT_GIM_0193	0	0	0	2	0	1	8	11	9	2	0	0	0	0	0	0	0	0	0	0	0	1	0	1	0	0	0	1	0	1	1	5	4	0	0	0	0	0	0	0	0	0	0	0	0	1	0
CUT_GIM_0194	CUT_GIM_0194	CUT_GIM_0194	0	0	0	0	0	0	20	13	24	0	0	1	1	0	0	1	0	1	0	0	0	0	0	2	0	0	0	0	0	0	2	5	11	0	0	0	4	0	0	0	0	1	0	0	0	0	0
CUT_GIM_0195	CUT_GIM_0195	CUT_GIM_0195	1013	346	620	1741	1859	1806	4088	1005	1208	2972	57	1228	127	276	195	968	807	1647	123	239	208	623	1089	1271	1086	591	617	1186	1880	1597	352	419	549	732	778	573	450	480	511	476	745	1035	472	601	457	553	898
CUT_GIM_0196	CUT_GIM_0196	CUT_GIM_0196	164	28	92	37	52	45	1090	120	100	735	0	333	6	22	14	158	85	126	4	21	17	72	79	142	176	48	92	25	53	40	94	50	45	181	0	155	21	38	37	78	78	79	15	53	37	64	65
CUT_GIM_0197	CUT_GIM_0197	CUT_GIM_0197	0	1	1	0	1	2	24	7	15	1	0	0	1	0	0	3	1	0	0	0	0	2	1	2	0	2	1	0	1	2	2	3	7	0	0	0	4	0	0	1	1	0	0	0	0	2	1
CUT_GIM_0198	CUT_GIM_0198	CUT_GIM_0198	35	36	53	185	79	86	3324	756	472	218	4	111	19	41	16	95	46	54	12	30	39	60	74	106	38	62	53	126	80	76	287	315	215	54	55	52	67	71	42	47	42	34	46	75	86	53	61
CUT_GIM_0199	CUT_GIM_0199	CUT_GIM_0199	0	0	0	0	0	1	22	10	15	1	0	0	0	0	1	1	0	1	0	0	1	0	0	1	0	0	0	0	0	1	2	4	7	0	0	0	0	0	3	0	0	1	0	0	2	0	0
CUT_GIM_0200	CUT_GIM_0200	CUT_GIM_0200	16	14	20	57	38	47	300	41	36	67	1	25	2	23	16	61	33	40	9	10	15	39	36	56	17	24	20	39	38	42	26	17	16	17	14	12	7	40	42	30	30	25	35	25	33	35	30
CUT_GIM_0201	CUT_GIM_0201	CUT_GIM_0201	2	2	3	5	3	1	114	16	22	5	0	4	0	1	0	5	2	1	0	2	0	1	2	5	2	3	3	3	3	1	10	7	10	1	0	2	0	2	0	2	2	1	0	5	0	1	2
CUT_GIM_0202	CUT_GIM_0202	CUT_GIM_0202	0	0	0	0	0	2	16	10	7	2	0	0	0	2	0	0	0	3	0	0	1	0	0	2	0	0	0	0	0	2	1	4	3	0	0	0	0	3	0	0	0	2	0	0	2	0	0
CUT_GIM_0203	CUT_GIM_0203	CUT_GIM_0203	440	240	506	248	250	265	3908	1077	908	1002	15	868	43	158	103	610	643	1011	43	114	125	268	768	1030	472	410	503	169	253	234	337	449	413	247	205	405	153	275	270	300	593	635	165	287	275	238	633
CUT_GIM_0204	CUT_GIM_0204	CUT_GIM_0204	404	97	197	201	298	340	1588	370	441	1063	12	601	28	74	53	358	265	665	15	57	59	203	344	503	433	166	196	137	301	301	137	154	200	262	164	280	99	129	139	176	245	418	58	143	130	180	284
CUT_GIM_0205	CUT_GIM_0205	CUT_GIM_0205	16	10	13	86	64	61	598	177	158	85	1	83	8	11	12	53	19	31	6	5	23	25	29	42	17	17	13	59	65	54	52	74	72	21	14	39	28	19	31	26	18	19	23	13	51	22	24
CUT_GIM_0206	CUT_GIM_0206	CUT_GIM_0206	3	1	1	23	11	14	120	26	26	23	0	16	1	6	4	20	5	15	5	2	1	9	4	13	3	2	1	16	11	12	10	11	12	6	0	7	4	10	10	10	5	9	19	5	2	8	3
CUT_GIM_0207	CUT_GIM_0207	CUT_GIM_0207	6	2	10	8	8	11	596	75	71	88	1	44	2	4	4	33	12	22	2	5	2	12	10	19	6	3	10	5	8	10	51	31	32	22	14	21	7	7	10	16	11	14	8	13	4	11	8
CUT_GIM_0208	CUT_GIM_0208	CUT_GIM_0208	1	1	0	0	0	0	10	11	23	2	0	0	0	0	1	2	0	0	0	0	0	2	0	0	1	2	0	0	0	0	1	5	10	0	0	0	0	0	3	1	0	0	0	0	0	2	0
CUT_GIM_0209	CUT_GIM_0209	CUT_GIM_0209	0	1	0	4	3	3	148	35	37	16	0	4	1	2	3	3	5	2	0	1	1	1	2	9	0	2	0	3	3	3	13	15	17	4	0	2	4	3	8	1	5	1	0	3	2	1	2
CUT_GIM_0210	CUT_GIM_0210	CUT_GIM_0210	1	1	1	6	0	3	74	1	4	1	0	1	0	0	0	1	0	2	0	0	0	0	0	1	1	2	1	4	0	3	6	0	2	0	0	0	0	0	0	0	0	1	0	0	0	0	0
CUT_GIM_0211	CUT_GIM_0211	CUT_GIM_0211	1	1	5	16	10	12	52	5	11	10	0	6	4	7	2	10	5	5	0	1	1	5	6	9	1	2	5	11	10	11	4	2	5	2	0	3	14	12	5	5	5	3	0	3	2	4	5
CUT_GIM_0212	CUT_GIM_0212	CUT_GIM_0212	1	1	6	7	2	1	64	30	52	13	0	4	0	0	0	3	5	3	1	2	2	0	3	0	1	2	6	5	2	1	6	12	24	3	0	2	0	0	0	1	5	2	4	5	4	0	2
CUT_GIM_0213	CUT_GIM_0213	CUT_GIM_0213	11	5	4	8	8	4	428	111	67	42	0	11	5	4	2	11	8	5	1	1	6	4	6	12	12	9	4	5	8	4	37	46	30	10	0	5	18	7	5	5	7	3	4	3	13	4	5
CUT_GIM_0214	CUT_GIM_0214	CUT_GIM_0214	13	5	23	24	11	23	1146	153	157	72	0	36	5	10	11	45	18	38	2	11	14	17	25	56	14	9	23	16	11	20	99	64	71	18	0	17	18	17	29	22	17	24	8	28	31	15	21
CUT_GIM_0215	CUT_GIM_0215	CUT_GIM_0215	57	2	26	94	113	169	758	98	60	176	0	18	21	59	52	183	69	105	34	28	69	138	56	87	61	3	26	64	114	149	65	41	27	43	0	8	74	103	136	90	64	66	131	70	152	123	46
CUT_GIM_0216	CUT_GIM_0216	CUT_GIM_0216	11	9	8	12	12	18	446	145	129	71	1	31	3	16	11	71	44	45	3	13	11	33	50	72	12	15	8	8	12	16	38	60	59	17	14	14	11	28	29	35	41	28	12	33	24	29	41
CUT_GIM_0217	CUT_GIM_0217	CUT_GIM_0217	1	0	0	0	0	0	18	4	3	1	0	4	0	0	0	2	0	0	0	0	1	0	0	0	1	0	0	0	0	0	2	2	1	0	0	2	0	0	0	1	0	0	0	0	2	0	0
CUT_GIM_0218	CUT_GIM_0218	CUT_GIM_0218	0	0	3	5	2	1	26	18	16	8	0	6	1	1	0	3	1	1	0	1	0	0	2	5	0	0	3	3	2	1	2	7	7	2	0	3	4	2	0	1	1	1	0	3	0	0	2
CUT_GIM_0219	CUT_GIM_0219	CUT_GIM_0219	1	3	0	2	3	3	32	10	10	20	0	12	4	4	4	7	2	2	0	0	1	6	2	10	1	5	0	1	3	3	3	4	5	5	0	6	14	7	10	3	2	1	0	0	2	5	2
CUT_GIM_0220	CUT_GIM_0220	CUT_GIM_0220	0	5	4	2	2	1	86	55	66	5	1	0	0	1	1	4	2	1	0	2	1	2	0	4	0	9	4	1	2	1	7	23	30	1	14	0	0	2	3	2	2	1	0	5	2	2	0
CUT_GIM_0221	CUT_GIM_0221	CUT_GIM_0221	0	1	0	2	1	0	26	14	28	3	0	0	0	0	0	1	0	0	0	1	0	1	0	3	0	2	0	1	1	0	2	6	13	1	0	0	0	0	0	0	0	0	0	3	0	1	0
CUT_GIM_0222	CUT_GIM_0222	CUT_GIM_0222	2	1	3	4	1	2	142	18	31	14	0	3	1	2	0	2	3	1	0	1	0	2	2	2	2	2	3	3	1	2	12	7	14	3	0	1	4	3	0	1	3	1	0	3	0	2	2
CUT_GIM_0223	CUT_GIM_0223	CUT_GIM_0223	107	22	51	26	42	53	1202	171	195	312	0	63	4	28	17	135	82	103	6	17	28	43	86	133	115	38	51	18	42	47	104	71	89	77	0	29	14	49	45	66	76	65	23	43	62	38	71
CUT_GIM_0224	CUT_GIM_0224	CUT_GIM_0224	0	1	0	0	1	1	26	8	13	3	0	1	0	2	1	4	2	2	0	3	0	2	2	4	0	2	0	0	1	1	2	3	6	1	0	0	0	3	3	2	2	1	0	8	0	2	2
CUT_GIM_0225	CUT_GIM_0225	CUT_GIM_0225	0	1	1	1	0	0	20	7	12	1	0	0	0	0	1	2	0	0	0	0	0	0	0	2	0	2	1	1	0	0	2	3	5	0	0	0	0	0	3	1	0	0	0	0	0	0	0
CUT_GIM_0226	CUT_GIM_0226	CUT_GIM_0226	404	91	204	130	334	304	1146	520	359	1133	15	582	22	121	83	334	437	795	16	90	85	190	571	824	433	155	203	89	338	269	99	217	163	279	205	272	78	211	217	164	403	500	61	226	187	169	471
CUT_GIM_0227	CUT_GIM_0227	CUT_GIM_0227	0	0	0	1	1	2	36	14	16	3	0	8	0	0	0	3	0	1	0	1	0	1	1	0	0	0	0	1	1	2	3	6	7	1	0	4	0	0	0	1	0	1	0	3	0	1	1
CUT_GIM_0228	CUT_GIM_0228	CUT_GIM_0228	5	0	4	2	3	4	46	10	14	21	0	4	1	2	0	19	14	8	1	1	3	4	7	12	5	0	4	1	3	4	4	4	6	5	0	2	4	3	0	9	13	5	4	3	7	4	6
CUT_GIM_0229	CUT_GIM_0229	CUT_GIM_0229	0	0	2	0	0	0	76	25	50	1	0	0	0	0	0	0	0	0	1	0	1	0	1	0	0	0	2	0	0	0	7	10	23	0	0	0	0	0	0	0	0	0	4	0	2	0	1
CUT_GIM_0230	CUT_GIM_0230	CUT_GIM_0230	0	0	0	2	1	0	14	8	8	1	0	0	0	0	0	0	0	1	0	1	0	1	1	2	0	0	0	1	1	0	1	3	4	0	0	0	0	0	0	0	0	1	0	3	0	1	1
CUT_GIM_0231	CUT_GIM_0231	CUT_GIM_0231	0	0	0	0	0	0	12	19	29	0	0	0	0	1	0	0	0	0	1	0	0	0	0	1	0	0	0	0	0	0	1	8	13	0	0	0	0	2	0	0	0	0	4	0	0	0	0
CUT_GIM_0232	CUT_GIM_0232	CUT_GIM_0232	1	1	1	2	0	2	48	38	39	4	0	12	0	0	0	5	3	2	1	2	1	2	4	4	1	2	1	1	0	2	4	16	18	1	0	6	0	0	0	2	3	1	4	5	2	2	3
CUT_GIM_0233	CUT_GIM_0233	CUT_GIM_0233	25	10	9	30	30	30	444	71	43	164	6	103	16	21	17	55	24	34	11	16	22	21	29	49	27	17	9	20	30	27	38	30	20	40	82	48	57	37	45	27	22	21	42	40	48	19	24
CUT_GIM_0234	CUT_GIM_0234	CUT_GIM_0234	2	5	10	18	19	21	338	49	46	71	1	31	4	5	9	30	7	4	6	0	2	13	10	16	2	9	10	12	19	19	29	20	21	17	14	14	14	9	24	15	6	3	23	0	4	12	8
CUT_GIM_0235	CUT_GIM_0235	CUT_GIM_0235	0	0	0	1	1	0	30	7	21	2	0	4	0	0	0	0	3	1	0	1	0	0	0	4	0	0	0	1	1	0	3	3	10	0	0	2	0	0	0	0	3	1	0	3	0	0	0
CUT_GIM_0236	CUT_GIM_0236	CUT_GIM_0236	0	8	4	3	5	5	188	98	95	14	1	6	0	1	3	4	3	5	1	3	1	2	0	6	0	14	4	2	5	4	16	41	43	3	14	3	0	2	8	2	3	3	4	8	2	2	0
CUT_GIM_0237	CUT_GIM_0237	CUT_GIM_0237	0	1	0	1	0	1	32	22	28	4	0	2	0	0	0	1	0	0	1	0	0	1	0	0	0	2	0	1	0	1	3	9	13	1	0	1	0	0	0	0	0	0	4	0	0	1	0
CUT_GIM_0238	CUT_GIM_0238	CUT_GIM_0238	4	3	9	14	10	7	328	108	91	37	0	14	1	4	3	3	6	7	1	4	3	8	5	10	4	5	9	10	10	6	28	45	41	9	0	7	4	7	8	1	6	4	4	10	7	7	4
CUT_GIM_0239	CUT_GIM_0239	CUT_GIM_0239	4	2	5	6	6	4	108	34	17	12	0	4	1	1	0	9	2	5	0	1	1	3	1	9	4	3	5	4	6	4	9	14	8	3	0	2	4	2	0	4	2	3	0	3	2	3	1
CUT_GIM_0240	CUT_GIM_0240	CUT_GIM_0240	0	1	0	2	1	0	54	19	24	0	0	0	0	0	0	0	0	0	0	0	0	1	0	0	0	2	0	1	1	0	5	8	11	0	0	0	0	0	0	0	0	0	0	0	0	1	0
CUT_GIM_0241	CUT_GIM_0241	CUT_GIM_0241	6	3	7	21	6	13	328	87	84	42	1	18	4	11	5	18	6	12	4	9	5	15	10	22	6	5	7	14	6	11	28	36	38	10	14	8	14	19	13	9	6	8	15	23	11	13	8
CUT_GIM_0242	CUT_GIM_0242	CUT_GIM_0242	0	0	4	4	0	7	54	60	83	9	0	2	1	1	1	7	3	4	1	0	1	4	2	8	0	0	4	3	0	6	5	25	38	2	0	1	4	2	3	3	3	3	4	0	2	4	2
CUT_GIM_0243	CUT_GIM_0243	CUT_GIM_0243	160	45	133	80	146	185	1618	192	181	746	1	161	20	71	59	341	258	569	16	59	72	188	392	539	172	77	132	55	148	164	139	80	82	184	14	75	71	124	154	168	238	358	61	148	158	167	323
CUT_GIM_0244	CUT_GIM_0244	CUT_GIM_0244	136	22	49	50	90	114	218	87	127	310	0	172	7	37	16	179	141	211	4	34	23	57	208	246	146	38	49	34	91	101	19	36	58	76	0	80	25	64	42	88	130	133	15	85	51	51	171
CUT_GIM_0245	CUT_GIM_0245	CUT_GIM_0245	972	450	1060	2370	4379	4109	14356	3071	2647	4274	49	1490	153	373	277	1835	1761	2813	142	306	383	1033	1988	2722	1042	769	1054	1615	4429	3633	1237	1279	1203	1053	669	695	543	649	725	902	1625	1768	545	769	842	918	1639
CUT_GIM_0246	CUT_GIM_0246	CUT_GIM_0246	0	0	0	1	0	0	6	4	5	2	0	0	0	0	0	2	0	2	0	0	0	0	1	0	0	0	0	1	0	0	1	2	2	0	0	0	0	0	0	1	0	1	0	0	0	0	1
CUT_GIM_0247	CUT_GIM_0247	CUT_GIM_0247	193	20	83	37	60	54	2868	212	175	451	1	108	16	30	26	273	162	273	9	41	41	125	257	307	207	34	83	25	61	48	247	88	80	111	14	50	57	52	68	134	149	172	35	103	90	111	212
CUT_GIM_0248	CUT_GIM_0248	CUT_GIM_0248	0	1	0	0	1	0	28	8	11	4	0	0	0	0	0	0	0	1	0	1	0	0	0	1	0	2	0	0	1	0	2	3	5	1	0	0	0	0	0	0	0	1	0	3	0	0	0
CUT_GIM_0249	CUT_GIM_0249	CUT_GIM_0249	3	0	3	3	2	5	162	32	35	14	0	7	0	0	1	5	1	3	0	0	2	0	3	5	3	0	3	2	2	4	14	13	16	3	0	3	0	0	3	2	1	2	0	0	4	0	2
CUT_GIM_0250	CUT_GIM_0250	CUT_GIM_0250	4	4	1	53	16	21	100	28	37	16	0	2	1	2	2	13	6	4	1	4	3	6	3	4	4	7	1	36	16	19	9	12	17	4	0	1	4	3	5	6	6	3	4	10	7	5	2
CUT_GIM_0251	CUT_GIM_0251	CUT_GIM_0251	2	5	0	14	3	6	146	51	64	24	0	11	3	6	4	10	3	10	1	2	1	2	5	5	2	9	0	10	3	5	13	21	29	6	0	5	11	10	10	5	3	6	4	5	2	2	4
CUT_GIM_0252	CUT_GIM_0252	CUT_GIM_0252	6	2	3	17	15	18	84	28	30	15	0	8	5	5	5	13	6	9	2	3	7	14	9	17	6	3	3	12	15	16	7	12	14	4	0	4	18	9	13	6	6	6	8	8	15	12	7
CUT_GIM_0253	CUT_GIM_0253	CUT_GIM_0253	4	1	4	2	1	3	140	30	16	4	0	8	0	1	0	1	3	1	0	0	1	1	1	3	4	2	4	1	1	3	12	12	7	1	0	4	0	2	0	0	3	1	0	0	2	1	1
CUT_GIM_0254	CUT_GIM_0254	CUT_GIM_0254	1	0	0	0	0	0	12	8	17	4	0	1	0	0	0	4	2	0	0	0	0	2	2	1	1	0	0	0	0	0	1	3	8	1	0	0	0	0	0	2	2	0	0	0	0	2	2
CUT_GIM_0255	CUT_GIM_0255	CUT_GIM_0255	6	7	11	9	10	17	278	142	167	21	0	9	1	5	5	31	17	22	1	4	6	13	19	33	6	12	11	6	10	15	24	59	76	5	0	4	4	9	13	15	16	14	4	10	13	12	16
CUT_GIM_0256	CUT_GIM_0256	CUT_GIM_0256	0	0	2	0	0	0	66	23	43	1	0	0	0	0	0	0	0	0	1	0	1	0	1	0	0	0	2	0	0	0	6	10	20	0	0	0	0	0	0	0	0	0	4	0	2	0	1
CUT_GIM_0257	CUT_GIM_0257	CUT_GIM_0257	20	7	13	15	21	20	244	46	47	99	0	50	10	9	15	42	14	14	4	8	13	11	15	24	21	12	13	10	21	18	21	19	21	24	0	23	35	16	39	21	13	9	15	20	29	10	12
CUT_GIM_0258	CUT_GIM_0258	CUT_GIM_0258	1	3	3	1	1	4	118	62	64	1	0	0	0	1	0	5	1	1	0	1	0	1	2	4	1	5	3	1	1	4	10	26	29	0	0	0	0	2	0	2	1	1	0	3	0	1	2
CUT_GIM_0259	CUT_GIM_0259	CUT_GIM_0259	4	4	1	54	16	21	100	28	37	17	0	2	1	2	2	13	6	4	1	4	3	6	3	4	4	7	1	37	16	19	9	12	17	4	0	1	4	3	5	6	6	3	4	10	7	5	2
CUT_GIM_0260	CUT_GIM_0260	CUT_GIM_0260	8	6	7	16	17	14	220	42	45	64	0	31	4	19	2	24	12	21	3	7	8	13	8	27	9	10	7	11	17	12	19	17	20	16	0	14	14	33	5	12	11	13	12	18	18	12	7
CUT_GIM_0261	CUT_GIM_0261	CUT_GIM_0261	13	7	17	60	51	61	532	86	87	97	2	29	10	20	10	59	26	40	10	10	19	26	40	68	14	12	17	41	52	54	46	36	40	24	27	14	35	35	26	29	24	25	38	25	42	23	33
CUT_GIM_0262	CUT_GIM_0262	CUT_GIM_0262	0	2	1	9	2	4	68	40	59	4	0	3	0	3	0	8	3	4	1	1	1	4	4	2	0	3	1	6	2	4	6	17	27	1	0	1	0	5	0	4	3	3	4	3	2	4	3
CUT_GIM_0263	CUT_GIM_0263	CUT_GIM_0263	2	2	5	7	1	4	94	30	45	6	0	2	0	1	1	3	4	5	0	1	2	4	1	4	2	3	5	5	1	4	8	12	20	1	0	1	0	2	3	1	4	3	0	3	4	4	1
CUT_GIM_0264	CUT_GIM_0264	CUT_GIM_0264	4	2	5	2	4	6	74	24	27	32	0	11	1	7	8	18	9	11	0	1	4	15	13	18	4	3	5	1	4	5	6	10	12	8	0	5	4	12	21	9	8	7	0	3	9	13	11
CUT_GIM_0265	CUT_GIM_0265	CUT_GIM_0265	109	39	89	59	55	45	300	89	68	363	2	103	9	32	25	98	86	182	7	22	27	60	113	168	117	67	89	40	56	40	26	37	31	89	27	48	32	56	65	48	79	114	27	55	59	53	93
CUT_GIM_0266	CUT_GIM_0266	CUT_GIM_0266	0	2	3	9	11	11	86	32	33	6	0	8	1	1	3	7	1	2	1	2	0	2	3	4	0	3	3	6	11	10	7	13	15	1	0	4	4	2	8	3	1	1	4	5	0	2	2
CUT_GIM_0267	CUT_GIM_0267	CUT_GIM_0267	18	3	16	15	16	14	498	70	96	114	0	39	8	10	5	27	15	27	2	7	12	12	19	24	19	5	16	10	16	12	43	29	44	28	0	18	28	17	13	13	14	17	8	18	26	11	16
CUT_GIM_0268	CUT_GIM_0268	CUT_GIM_0268	295	149	287	2796	1819	1763	7744	1593	1370	917	12	237	114	272	150	929	557	654	57	228	255	271	643	1004	316	255	285	1905	1840	1559	668	663	623	226	164	111	404	474	393	457	514	411	219	573	561	241	530
CUT_GIM_0269	CUT_GIM_0269	CUT_GIM_0269	20	9	29	84	66	79	288	79	73	89	0	45	14	14	21	54	44	57	7	17	15	54	60	69	21	15	29	57	67	70	25	33	33	22	0	21	50	24	55	27	41	36	27	43	33	48	49
CUT_GIM_0270	CUT_GIM_0270	CUT_GIM_0270	7	4	6	18	6	20	408	80	77	40	1	38	2	4	5	15	7	16	3	2	1	14	6	20	8	7	6	12	6	18	35	33	35	10	14	18	7	7	13	7	6	10	12	5	2	12	5
CUT_GIM_0271	CUT_GIM_0271	CUT_GIM_0271	2	3	2	18	18	20	134	24	31	13	0	6	0	1	2	4	1	4	2	2	2	2	3	5	2	5	2	12	18	18	12	10	14	3	0	3	0	2	5	2	1	3	8	5	4	2	2
CUT_GIM_0272	CUT_GIM_0272	CUT_GIM_0272	5424	1249	3754	2147	2763	3611	23556	1926	1646	18130	72	6113	416	1656	1129	11728	7764	12927	393	981	1369	6446	9028	14065	5817	2134	3734	1463	2795	3192	2030	802	748	4468	983	2852	1476	2883	2956	5764	7164	8125	1509	2467	3011	5727	7444
CUT_GIM_0273	CUT_GIM_0273	CUT_GIM_0273	20	2	8	12	6	6	342	71	90	50	0	14	1	9	5	59	15	20	0	2	8	14	18	36	21	3	8	8	6	5	29	30	41	12	0	7	4	16	13	29	14	13	0	5	18	12	15
CUT_GIM_0274	CUT_GIM_0274	CUT_GIM_0274	7	0	0	6	3	3	232	25	30	15	0	15	0	3	5	7	6	7	2	2	1	7	8	10	8	0	0	4	3	3	20	10	14	4	0	7	0	5	13	3	6	4	8	5	2	6	7
CUT_GIM_0275	CUT_GIM_0275	CUT_GIM_0275	9	2	4	10	11	12	638	106	84	111	0	12	2	6	4	35	22	28	4	4	15	24	22	35	10	3	4	7	11	11	55	44	38	27	0	6	7	10	10	17	20	18	15	10	33	21	18
CUT_GIM_0276	CUT_GIM_0276	CUT_GIM_0276	2	3	2	2	2	4	146	39	36	9	0	53	2	2	0	20	2	6	0	1	3	3	9	14	2	5	2	1	2	4	13	16	16	2	0	25	7	3	0	10	2	4	0	3	7	3	7
CUT_GIM_0277	CUT_GIM_0277	CUT_GIM_0277	0	1	1	6	1	3	50	30	40	2	0	3	0	3	0	6	3	4	1	1	1	3	4	2	0	2	1	4	1	3	4	12	18	0	0	1	0	5	0	3	3	3	4	3	2	3	3
CUT_GIM_0278	CUT_GIM_0278	CUT_GIM_0278	0	2	2	7	5	1	164	48	61	6	0	1	0	1	2	5	0	2	0	2	0	0	1	1	0	3	2	5	5	1	14	20	28	1	0	0	0	2	5	2	0	1	0	5	0	0	1
CUT_GIM_0279	CUT_GIM_0279	CUT_GIM_0279	418	157	305	337	468	424	4870	972	942	1377	24	734	52	137	109	414	361	585	42	149	113	254	431	653	448	268	303	230	473	375	420	405	428	339	328	342	184	238	285	203	333	368	161	375	249	226	355
CUT_GIM_0280	CUT_GIM_0280	CUT_GIM_0280	1	1	0	1	1	2	12	9	10	3	0	29	0	1	0	1	0	1	0	0	0	1	0	2	1	2	0	1	1	2	1	4	5	1	0	14	0	2	0	0	0	1	0	0	0	1	0
CUT_GIM_0281	CUT_GIM_0281	CUT_GIM_0281	1	0	1	3	2	4	60	19	29	6	0	4	0	2	0	3	5	1	1	0	0	1	1	3	1	0	1	2	2	4	5	8	13	1	0	2	0	3	0	1	5	1	4	0	0	1	1
CUT_GIM_0282	CUT_GIM_0282	CUT_GIM_0282	8	2	10	35	35	57	214	127	67	66	1	74	1	9	1	22	6	15	2	5	7	15	12	12	9	3	10	24	35	50	18	53	30	16	14	35	4	16	3	11	6	9	8	13	15	13	10
CUT_GIM_0283	CUT_GIM_0283	CUT_GIM_0283	0	1	4	2	6	5	64	25	23	14	0	4	3	1	4	5	6	11	1	3	3	1	6	13	0	2	4	1	6	4	6	10	10	3	0	2	11	2	10	2	6	7	4	8	7	1	5
CUT_GIM_0284	CUT_GIM_0284	CUT_GIM_0284	251	120	208	123	163	182	1280	216	182	864	10	435	23	79	58	333	263	470	23	54	68	206	334	481	269	205	207	84	165	161	110	90	83	213	137	203	82	138	152	164	243	295	88	136	150	183	275
CUT_GIM_0285	CUT_GIM_0285	CUT_GIM_0285	1	1	0	4	1	5	22	7	22	4	0	1	0	0	0	3	1	0	0	0	0	1	0	3	1	2	0	3	1	4	2	3	10	1	0	0	0	0	0	1	1	0	0	0	0	1	0
CUT_GIM_0286	CUT_GIM_0286	CUT_GIM_0286	2	0	3	0	0	0	54	18	35	0	0	0	0	0	0	0	0	0	0	0	1	0	0	0	2	0	3	0	0	0	5	7	16	0	0	0	0	0	0	0	0	0	0	0	2	0	0
CUT_GIM_0287	CUT_GIM_0287	CUT_GIM_0287	23	5	15	4	7	12	162	30	23	106	0	80	2	3	4	37	16	19	2	3	1	21	14	41	25	9	15	3	7	11	14	12	10	26	0	37	7	5	10	18	15	12	8	8	2	19	12
CUT_GIM_0288	CUT_GIM_0288	CUT_GIM_0288	378	77	229	63	117	150	5992	303	276	1147	1	582	24	95	52	328	344	470	14	59	102	118	370	627	405	132	228	43	118	133	516	126	125	283	14	272	85	165	136	161	317	295	54	148	224	105	305
CUT_GIM_0289	CUT_GIM_0289	CUT_GIM_0289	0	0	0	0	0	0	10	1	2	1	0	3	0	0	0	0	0	0	0	0	0	0	0	0	0	0	0	0	0	0	1	0	1	0	0	1	0	0	0	0	0	0	0	0	0	0	0
CUT_GIM_0290	CUT_GIM_0290	CUT_GIM_0290	27	6	22	7	12	15	228	39	28	132	0	115	5	8	6	47	20	29	4	5	4	28	23	46	29	10	22	5	12	13	20	16	13	33	0	54	18	14	16	23	18	18	15	13	9	25	19
CUT_GIM_0291	CUT_GIM_0291	CUT_GIM_0291	2	1	1	1	2	2	82	30	28	22	2	5	1	3	0	14	3	5	2	2	3	7	4	10	2	2	1	1	2	2	7	12	13	5	27	2	4	5	0	7	3	3	8	5	7	6	3
CUT_GIM_0292	CUT_GIM_0292	CUT_GIM_0292	78	62	96	476	163	170	4872	1002	664	350	4	203	52	89	50	245	89	118	44	74	71	147	100	207	84	106	95	324	165	150	420	417	302	86	55	95	184	155	131	120	82	74	169	186	156	131	82
CUT_GIM_0293	CUT_GIM_0293	CUT_GIM_0293	1	1	4	9	6	9	126	23	26	9	0	14	0	0	1	9	4	5	1	1	1	2	0	5	1	2	4	6	6	8	11	10	12	2	0	7	0	0	3	4	4	3	4	3	2	2	0
CUT_GIM_0294	CUT_GIM_0294	CUT_GIM_0294	2	2	1	2	0	0	48	32	49	11	0	1	0	1	0	5	1	2	0	1	1	1	2	0	2	3	1	1	0	0	4	13	22	3	0	0	0	2	0	2	1	1	0	3	2	1	2
CUT_GIM_0295	CUT_GIM_0295	CUT_GIM_0295	2	2	6	5	4	7	120	26	30	28	0	12	2	2	0	10	2	6	1	1	2	2	3	7	2	3	6	3	4	6	10	11	14	7	0	6	7	3	0	5	2	4	4	3	4	2	2
CUT_GIM_0296	CUT_GIM_0296	CUT_GIM_0296	0	2	2	7	5	1	156	45	54	6	0	1	0	1	2	4	0	2	0	2	0	0	1	1	0	3	2	5	5	1	13	19	25	1	0	0	0	2	5	2	0	1	0	5	0	0	1
CUT_GIM_0297	CUT_GIM_0297	CUT_GIM_0297	5	4	9	16	19	24	310	83	98	23	0	10	2	7	1	13	10	12	3	2	2	9	8	17	5	7	9	11	19	21	27	35	45	6	0	5	7	12	3	6	9	8	12	5	4	8	7
CUT_GIM_0298	CUT_GIM_0298	CUT_GIM_0298	4	2	2	15	7	13	196	61	53	38	0	30	4	5	0	14	2	10	2	7	0	3	6	11	4	3	2	10	7	11	17	25	24	9	0	14	14	9	0	7	2	6	8	18	0	3	5
CUT_GIM_0299	CUT_GIM_0299	CUT_GIM_0299	71	61	91	470	151	156	4796	990	649	310	4	198	50	85	48	213	79	104	43	73	69	132	94	185	76	104	91	320	153	138	413	412	295	76	55	92	177	148	126	105	73	65	165	184	152	117	78
CUT_GIM_0300	CUT_GIM_0300	CUT_GIM_0300	70	26	104	53	59	106	448	53	56	368	0	76	11	43	26	226	138	225	10	27	50	114	151	265	75	44	103	36	60	94	39	22	25	91	0	35	39	75	68	111	127	141	38	68	110	101	125
CUT_GIM_0301	CUT_GIM_0301	CUT_GIM_0301	0	1	4	1	0	1	48	19	20	9	0	5	0	1	2	3	0	1	0	2	0	0	1	2	0	2	4	1	0	1	4	8	9	2	0	2	0	2	5	1	0	1	0	5	0	0	1
CUT_GIM_0302	CUT_GIM_0302	CUT_GIM_0302	12	10	7	11	8	3	454	87	86	44	2	11	3	2	2	22	2	7	0	5	2	6	7	13	13	17	7	7	8	3	39	36	39	11	27	5	11	3	5	11	2	4	0	13	4	5	6
CUT_GIM_0303	CUT_GIM_0303	CUT_GIM_0303	0	1	0	0	0	0	26	1	4	2	0	0	0	0	0	0	0	0	0	0	0	0	0	2	0	2	0	0	0	0	2	0	2	0	0	0	0	0	0	0	0	0	0	0	0	0	0
CUT_GIM_0304	CUT_GIM_0304	CUT_GIM_0304	2	2	5	7	1	3	92	30	45	6	0	2	0	1	1	3	4	5	0	1	2	4	1	4	2	3	5	5	1	3	8	12	20	1	0	1	0	2	3	1	4	3	0	3	4	4	1
CUT_GIM_0305	CUT_GIM_0305	CUT_GIM_0305	189	15	62	42	79	99	1102	69	82	380	2	59	10	32	29	282	139	309	5	30	48	112	197	298	203	26	62	29	80	88	95	29	37	94	27	28	35	56	76	139	128	194	19	75	106	99	162
CUT_GIM_0306	CUT_GIM_0306	CUT_GIM_0306	1	2	2	5	2	1	34	12	17	4	0	2	0	2	1	1	1	2	0	1	0	1	0	2	1	3	2	3	2	1	3	5	8	1	0	1	0	3	3	0	1	1	0	3	0	1	0
CUT_GIM_0307	CUT_GIM_0307	CUT_GIM_0307	1	0	1	1	0	1	42	26	40	2	0	2	0	0	0	5	1	0	0	0	0	5	1	0	1	0	1	1	0	1	4	11	18	0	0	1	0	0	0	2	1	0	0	0	0	4	1
CUT_GIM_0308	CUT_GIM_0308	CUT_GIM_0308	1	0	3	5	6	8	54	12	10	4	0	7	1	3	0	5	2	6	2	0	3	2	1	5	1	0	3	3	6	7	5	5	5	1	0	3	4	5	0	2	2	4	8	0	7	2	1
CUT_GIM_0309	CUT_GIM_0309	CUT_GIM_0309	7	5	4	3	4	10	428	96	82	51	0	7	2	8	8	21	5	6	2	4	2	14	7	20	8	9	4	2	4	9	37	40	37	13	0	3	7	14	21	10	5	4	8	10	4	12	6
CUT_GIM_0310	CUT_GIM_0310	CUT_GIM_0310	0	1	1	0	0	1	72	19	32	1	0	0	0	1	0	3	1	0	1	1	0	1	0	3	0	2	1	0	0	1	6	8	15	0	0	0	0	2	0	1	1	0	4	3	0	1	0
CUT_GIM_0311	CUT_GIM_0311	CUT_GIM_0311	26	13	28	24	55	64	666	104	117	163	1	63	13	19	24	81	25	43	4	16	17	24	36	72	28	22	28	16	56	57	57	43	53	40	14	29	46	33	63	40	23	27	15	40	37	21	30
CUT_GIM_0312	CUT_GIM_0312	CUT_GIM_0312	1	0	1	3	2	3	60	19	24	5	0	4	0	1	0	3	3	1	1	0	0	1	1	3	1	0	1	2	2	3	5	8	11	1	0	2	0	2	0	1	3	1	4	0	0	1	1
CUT_GIM_0313	CUT_GIM_0313	CUT_GIM_0313	8	1	1	5	1	2	88	21	20	7	0	7	0	1	5	7	2	2	1	1	3	4	2	5	9	2	1	3	1	2	8	9	9	2	0	3	0	2	13	3	2	1	4	3	7	4	2
CUT_GIM_0314	CUT_GIM_0314	CUT_GIM_0314	1	1	0	2	1	2	42	15	12	3	0	2	0	0	0	2	0	0	0	0	0	1	0	1	1	2	0	1	1	2	4	6	5	1	0	1	0	0	0	1	0	0	0	0	0	1	0
CUT_GIM_0315	CUT_GIM_0315	CUT_GIM_0315	1	2	1	0	0	0	58	23	33	3	0	2	0	0	0	3	1	0	0	0	1	4	3	3	1	3	1	0	0	0	5	10	15	1	0	1	0	0	0	1	1	0	0	0	2	4	2
CUT_GIM_0316	CUT_GIM_0316	CUT_GIM_0316	10	3	16	105	51	32	84	45	30	23	1	20	5	10	7	24	13	15	3	9	8	7	18	17	11	5	16	72	52	28	7	19	14	6	14	9	18	17	18	12	12	9	12	23	18	6	15
CUT_GIM_0317	CUT_GIM_0317	CUT_GIM_0317	0	0	2	1	1	1	48	41	34	1	0	0	0	0	0	4	1	1	0	0	0	1	1	1	0	0	2	1	1	1	4	17	15	0	0	0	0	0	0	2	1	1	0	0	0	1	1
CUT_GIM_0318	CUT_GIM_0318	CUT_GIM_0318	0	0	1	4	0	3	70	18	26	4	0	1	0	0	0	1	1	1	0	0	0	1	0	1	0	0	1	3	0	3	6	7	12	1	0	0	0	0	0	0	1	1	0	0	0	1	0
CUT_GIM_0319	CUT_GIM_0319	CUT_GIM_0319	34	16	24	82	64	79	450	185	141	126	0	65	1	24	12	34	37	40	8	20	12	21	35	59	36	27	24	56	65	70	39	77	64	31	0	30	4	42	31	17	34	25	31	50	26	19	29
CUT_GIM_0320	CUT_GIM_0320	CUT_GIM_0320	3	6	10	8	5	5	328	115	92	24	0	9	2	12	4	10	7	11	1	5	3	8	6	8	3	10	10	5	5	4	28	48	42	6	0	4	7	21	10	5	6	7	4	13	7	7	5
CUT_GIM_0321	CUT_GIM_0321	CUT_GIM_0321	0	0	0	0	1	0	32	21	18	1	0	0	0	0	0	2	0	1	0	0	0	0	0	0	0	0	0	0	1	0	3	9	8	0	0	0	0	0	0	1	0	1	0	0	0	0	0
CUT_GIM_0322	CUT_GIM_0322	CUT_GIM_0322	1	4	5	14	5	5	116	39	44	8	1	3	1	1	4	12	1	9	1	0	2	3	4	6	1	7	5	10	5	4	10	16	20	2	14	1	4	2	10	6	1	6	4	0	4	3	3
CUT_GIM_0323	CUT_GIM_0323	CUT_GIM_0323	1	1	2	1	1	4	62	12	11	7	0	7	0	0	1	1	2	1	0	0	0	1	2	1	1	2	2	1	1	4	5	5	5	2	0	3	0	0	3	0	2	1	0	0	0	1	2
CUT_GIM_0324	CUT_GIM_0324	CUT_GIM_0324	0	1	0	0	0	0	20	23	22	1	0	0	0	1	0	0	0	1	0	0	0	0	1	1	0	2	0	0	0	0	2	10	10	0	0	0	0	2	0	0	0	1	0	0	0	0	1
CUT_GIM_0325	CUT_GIM_0325	CUT_GIM_0325	1	4	5	8	0	3	84	105	113	4	0	3	0	1	2	5	3	10	1	2	1	5	5	8	1	7	5	5	0	3	7	44	51	1	0	1	0	2	5	2	3	6	4	5	2	4	4
CUT_GIM_0326	CUT_GIM_0326	CUT_GIM_0326	7	4	8	26	32	27	150	27	25	56	1	16	4	8	10	23	10	25	6	7	7	12	17	21	8	7	8	18	32	24	13	11	11	14	14	7	14	14	26	11	9	16	23	18	15	11	14
CUT_GIM_0327	CUT_GIM_0327	CUT_GIM_0327	0	1	0	1	1	0	10	10	8	2	0	0	0	0	0	0	0	0	0	0	1	0	0	0	0	2	0	1	1	0	1	4	4	0	0	0	0	0	0	0	0	0	0	0	2	0	0
CUT_GIM_0328	CUT_GIM_0328	CUT_GIM_0328	8	1	1	5	1	2	82	19	16	7	0	7	0	1	4	7	2	2	1	1	3	3	2	5	9	2	1	3	1	2	7	8	7	2	0	3	0	2	10	3	2	1	4	3	7	3	2
CUT_GIM_0329	CUT_GIM_0329	CUT_GIM_0329	3	0	1	4	5	4	68	18	14	0	0	7	0	1	0	3	0	2	0	0	0	1	1	1	3	0	1	3	5	4	6	7	6	0	0	3	0	2	0	1	0	1	0	0	0	1	1
CUT_GIM_0330	CUT_GIM_0330	CUT_GIM_0330	1	4	5	7	0	3	82	103	112	4	0	3	0	1	2	4	3	8	1	2	1	5	5	8	1	7	5	5	0	3	7	43	51	1	0	1	0	2	5	2	3	5	4	5	2	4	4
CUT_GIM_0331	CUT_GIM_0331	CUT_GIM_0331	0	0	5	1	3	4	26	17	14	0	0	0	1	1	0	1	0	1	1	0	0	1	2	0	0	0	5	1	3	4	2	7	6	0	0	0	4	2	0	0	0	1	4	0	0	1	2
CUT_GIM_0332	CUT_GIM_0332	CUT_GIM_0332	1	0	2	1	1	0	90	20	8	24	1	11	2	3	1	5	2	3	0	1	1	2	1	8	1	0	2	1	1	0	8	8	4	6	14	5	7	5	3	2	2	2	0	3	2	2	1
CUT_GIM_0333	CUT_GIM_0333	CUT_GIM_0333	1	2	1	5	4	3	16	3	9	10	0	5	0	0	1	1	2	2	1	0	0	2	2	3	1	3	1	3	4	3	1	1	4	2	0	2	0	0	3	0	2	1	4	0	0	2	2
CUT_GIM_0334	CUT_GIM_0334	CUT_GIM_0334	3	6	10	8	5	5	326	113	89	24	0	9	2	12	3	10	7	11	1	5	3	8	6	8	3	10	10	5	5	4	28	47	40	6	0	4	7	21	8	5	6	7	4	13	7	7	5
CUT_GIM_0335	CUT_GIM_0335	CUT_GIM_0335	1	4	2	5	1	0	78	29	34	10	0	1	0	1	0	8	2	2	0	1	1	5	1	3	1	7	2	3	1	0	7	12	15	2	0	0	0	2	0	4	2	1	0	3	2	4	1
CUT_GIM_0336	CUT_GIM_0336	CUT_GIM_0336	218	63	176	119	113	116	706	161	136	629	5	178	22	59	43	331	205	441	21	35	49	171	270	418	234	108	175	81	114	103	61	67	62	155	68	83	78	103	113	163	189	277	81	88	108	152	223
CUT_GIM_0337	CUT_GIM_0337	CUT_GIM_0337	6	3	1	9	8	19	90	14	26	16	0	1	1	5	4	23	2	8	2	3	2	8	6	11	6	5	1	6	8	17	8	6	12	4	0	0	4	9	10	11	2	5	8	8	4	7	5
CUT_GIM_0338	CUT_GIM_0338	CUT_GIM_0338	0	1	3	2	2	3	44	15	18	2	0	2	1	1	0	1	0	2	0	0	0	0	1	2	0	2	3	1	2	3	4	6	8	0	0	1	4	2	0	0	0	1	0	0	0	0	1
CUT_GIM_0339	CUT_GIM_0339	CUT_GIM_0339	0	0	0	0	0	0	0	2	4	0	0	0	0	0	0	0	0	0	0	0	0	0	0	0	0	0	0	0	0	0	0	1	2	0	0	0	0	0	0	0	0	0	0	0	0	0	0
CUT_GIM_0340	CUT_GIM_0340	CUT_GIM_0340	0	1	1	1	3	2	44	27	12	3	0	4	1	1	1	0	1	1	0	0	1	1	1	2	0	2	1	1	3	2	4	11	5	1	0	2	4	2	3	0	1	1	0	0	2	1	1
CUT_GIM_0341	CUT_GIM_0341	CUT_GIM_0341	4	5	3	31	22	17	376	70	67	68	2	30	11	25	12	32	19	21	5	10	8	16	15	45	4	9	3	21	22	15	32	29	30	17	27	14	39	44	31	16	18	13	19	25	18	14	12
CUT_GIM_0342	CUT_GIM_0342	CUT_GIM_0342	0	1	1	2	1	0	42	21	26	1	0	2	0	1	0	0	0	1	0	0	1	1	0	1	0	2	1	1	1	0	4	9	12	0	0	1	0	2	0	0	0	1	0	0	2	1	0
CUT_GIM_0343	CUT_GIM_0343	CUT_GIM_0343	0	0	2	2	1	0	20	13	18	3	0	0	0	0	1	1	2	1	1	1	0	0	0	1	0	0	2	1	1	0	2	5	8	1	0	0	0	0	3	0	2	1	4	3	0	0	0
CUT_GIM_0344	CUT_GIM_0344	CUT_GIM_0344	2	0	2	0	1	0	72	33	33	13	0	1	0	1	0	10	0	3	1	1	0	2	0	2	2	0	2	0	1	0	6	14	15	3	0	0	0	2	0	5	0	2	4	3	0	2	0
CUT_GIM_0345	CUT_GIM_0345	CUT_GIM_0345	6	2	1	5	4	5	350	57	45	13	0	16	0	1	4	4	2	7	0	0	0	2	6	4	6	3	1	3	4	4	30	24	20	3	0	7	0	2	10	2	2	4	0	0	0	2	5
CUT_GIM_0346	CUT_GIM_0346	CUT_GIM_0346	23	3	12	14	6	4	572	56	47	94	0	58	3	7	1	20	4	15	3	4	4	9	5	13	25	5	12	10	6	4	49	23	21	23	0	27	11	12	3	10	4	9	12	10	9	8	4
CUT_GIM_0347	CUT_GIM_0347	CUT_GIM_0347	1	3	2	0	2	2	52	14	10	10	0	5	0	0	0	4	0	0	1	0	0	0	1	0	1	5	2	0	2	2	4	6	5	2	0	2	0	0	0	2	0	0	4	0	0	0	1
CUT_GIM_0348	CUT_GIM_0348	CUT_GIM_0348	0	2	0	1	2	1	136	42	37	1	0	2	2	2	0	5	1	0	0	0	0	2	1	2	0	3	0	1	2	1	12	17	17	0	0	1	7	3	0	2	1	0	0	0	0	2	1
CUT_GIM_0349	CUT_GIM_0349	CUT_GIM_0349	0	2	1	0	0	0	54	45	41	1	0	0	1	0	1	4	3	0	2	0	0	1	1	4	0	3	1	0	0	0	5	19	19	0	0	0	4	0	3	2	3	0	8	0	0	1	1
CUT_GIM_0350	CUT_GIM_0350	CUT_GIM_0350	0	0	0	0	0	1	10	5	17	1	0	0	1	0	0	2	1	0	1	0	0	0	0	0	0	0	0	0	0	1	1	2	8	0	0	0	4	0	0	1	1	0	4	0	0	0	0
CUT_GIM_0351	CUT_GIM_0351	CUT_GIM_0351	0	3	2	0	0	1	34	42	37	1	0	2	2	2	0	5	2	0	0	0	0	0	0	4	0	5	2	0	0	1	3	17	17	0	0	1	7	3	0	2	2	0	0	0	0	0	0
CUT_GIM_0352	CUT_GIM_0352	CUT_GIM_0352	4	3	1	16	42	19	128	35	22	25	0	14	1	1	1	4	8	8	3	1	0	5	3	2	4	5	1	11	42	17	11	15	10	6	0	7	4	2	3	2	7	5	12	3	0	4	2
CUT_GIM_0353	CUT_GIM_0353	CUT_GIM_0353	109	12	54	38	77	113	722	35	40	360	0	46	13	40	27	335	153	233	3	16	27	164	204	303	117	21	54	26	78	100	62	15	18	89	0	21	46	70	71	165	141	146	12	40	59	146	168
CUT_GIM_0354	CUT_GIM_0354	CUT_GIM_0354	82	5	35	39	52	92	602	49	55	377	1	86	7	27	20	229	114	172	14	15	19	118	134	194	88	9	35	27	53	81	52	20	25	93	14	40	25	47	52	113	105	108	54	38	42	105	110
CUT_GIM_0355	CUT_GIM_0355	CUT_GIM_0355	1	2	8	5	4	10	170	67	88	4	0	14	0	0	0	7	3	6	2	1	1	2	3	9	1	3	8	3	4	9	15	28	40	1	0	7	0	0	0	3	3	4	8	3	2	2	2
CUT_GIM_0356	CUT_GIM_0356	CUT_GIM_0356	0	5	9	5	2	1	54	30	54	5	1	3	0	0	0	9	3	2	1	1	2	2	2	1	0	9	9	3	2	1	5	12	25	1	14	1	0	0	0	4	3	1	4	3	4	2	2
CUT_GIM_0357	CUT_GIM_0357	CUT_GIM_0357	141	14	64	28	40	59	306	39	30	328	1	136	8	27	16	139	84	139	8	15	22	66	98	146	151	24	64	19	40	52	26	16	14	81	14	63	28	47	42	68	78	87	31	38	48	59	81
CUT_GIM_0358	CUT_GIM_0358	CUT_GIM_0358	5	2	9	3	2	6	166	23	23	34	0	5	2	1	1	27	5	10	0	4	3	13	12	23	5	3	9	2	2	5	14	10	10	8	0	2	7	2	3	13	5	6	0	10	7	12	10
CUT_GIM_0359	CUT_GIM_0359	CUT_GIM_0359	6	3	6	4	3	2	538	110	104	20	1	16	2	0	4	10	4	7	0	2	2	2	8	8	6	5	6	3	3	2	46	46	47	5	14	7	7	0	10	5	4	4	0	5	4	2	7
CUT_GIM_0360	CUT_GIM_0360	CUT_GIM_0360	247	84	206	157	132	145	806	191	154	708	10	226	27	70	51	376	239	514	26	38	61	205	310	469	265	144	205	107	134	128	69	80	70	174	137	105	96	122	134	185	221	323	100	96	134	182	256
CUT_GIM_0361	CUT_GIM_0361	CUT_GIM_0361	18	2	8	11	22	20	168	33	37	50	0	2	4	9	8	32	11	23	1	8	7	22	13	37	19	3	8	7	22	18	14	14	17	12	0	1	14	16	21	16	10	14	4	20	15	20	11
CUT_GIM_0362	CUT_GIM_0362	CUT_GIM_0362	7	2	5	20	12	9	152	46	31	31	0	13	4	8	5	16	4	9	3	0	6	9	8	7	8	3	5	14	12	8	13	19	14	8	0	6	14	14	13	8	4	6	12	0	13	8	7
CUT_GIM_0363	CUT_GIM_0363	CUT_GIM_0363	16	7	28	7	28	25	824	108	87	15	0	57	2	11	6	38	37	34	3	3	8	15	38	81	17	12	28	5	28	22	71	45	40	4	0	27	7	19	16	19	34	21	12	8	18	13	31
CUT_GIM_0364	CUT_GIM_0364	CUT_GIM_0364	33	16	36	189	112	119	496	169	133	119	1	49	6	19	13	41	28	45	15	14	14	40	38	56	35	27	36	129	113	105	43	70	60	29	14	23	21	33	34	20	26	28	58	35	31	36	31
CUT_GIM_0365	CUT_GIM_0365	CUT_GIM_0365	23	10	32	22	13	23	408	108	93	64	0	51	4	11	6	28	29	54	1	13	8	10	37	63	25	17	32	15	13	20	35	45	42	16	0	24	14	19	16	14	27	34	4	33	18	9	31
CUT_GIM_0366	CUT_GIM_0366	CUT_GIM_0366	1	2	1	2	1	2	62	27	20	4	0	0	0	1	0	1	0	0	0	0	0	1	1	3	1	3	1	1	1	2	5	11	9	1	0	0	0	2	0	0	0	0	0	0	0	1	1
CUT_GIM_0367	CUT_GIM_0367	CUT_GIM_0367	1	0	0	2	2	1	62	25	15	9	0	3	0	1	1	4	2	0	1	1	0	2	0	5	1	0	0	1	2	1	5	10	7	2	0	1	0	2	3	2	2	0	4	3	0	2	0
CUT_GIM_0368	CUT_GIM_0368	CUT_GIM_0368	12	0	3	9	15	7	398	94	63	20	2	22	0	3	3	13	2	11	1	2	2	6	9	12	13	0	3	6	15	6	34	39	29	5	27	10	0	5	8	6	2	7	4	5	4	5	7
CUT_GIM_0369	CUT_GIM_0369	CUT_GIM_0369	0	0	1	2	0	2	18	6	11	1	0	1	1	0	0	1	1	1	0	0	1	1	0	0	0	0	1	1	0	2	2	2	5	0	0	0	4	0	0	0	1	1	0	0	2	1	0
CUT_GIM_0370	CUT_GIM_0370	CUT_GIM_0370	9	0	1	5	3	5	118	29	28	11	1	10	0	2	2	6	1	6	0	1	2	4	7	6	10	0	1	3	3	4	10	12	13	3	14	5	0	3	5	3	1	4	0	3	4	4	6
CUT_GIM_0371	CUT_GIM_0371	CUT_GIM_0371	0	1	0	1	1	0	10	10	8	2	0	0	0	0	1	0	0	0	0	0	1	1	0	0	0	2	0	1	1	0	1	4	4	0	0	0	0	0	3	0	0	0	0	0	2	1	0
CUT_GIM_0372	CUT_GIM_0372	CUT_GIM_0372	0	0	0	0	3	6	28	7	11	2	0	2	0	1	3	3	1	2	0	1	0	4	0	2	0	0	0	0	3	5	2	3	5	0	0	1	0	2	8	1	1	1	0	3	0	4	0
CUT_GIM_0373	CUT_GIM_0373	CUT_GIM_0373	0	0	0	0	1	0	32	21	18	2	0	0	0	0	0	3	0	1	0	0	0	0	0	0	0	0	0	0	1	0	3	9	8	0	0	0	0	0	0	1	0	1	0	0	0	0	0
CUT_GIM_0374	CUT_GIM_0374	CUT_GIM_0374	1	2	1	2	1	3	66	31	22	5	0	0	0	1	0	2	0	0	0	0	0	1	1	3	1	3	1	1	1	3	6	13	10	1	0	0	0	2	0	1	0	0	0	0	0	1	1
CUT_GIM_0375	CUT_GIM_0375	CUT_GIM_0375	2	1	1	2	0	1	118	23	20	13	0	9	1	2	0	8	1	3	0	0	0	2	0	4	2	2	1	1	0	1	10	10	9	3	0	4	4	3	0	4	1	2	0	0	0	2	0
CUT_GIM_0376	CUT_GIM_0376	CUT_GIM_0376	1	0	0	0	0	0	24	16	8	0	0	1	0	0	0	0	1	1	0	0	0	0	1	0	1	0	0	0	0	0	2	7	4	0	0	0	0	0	0	0	1	1	0	0	0	0	1
CUT_GIM_0377	CUT_GIM_0377	CUT_GIM_0377	308	112	332	175	448	432	2142	732	649	1262	7	594	48	120	86	534	435	801	31	93	128	285	609	801	330	191	330	119	453	382	185	305	295	311	96	277	170	209	225	262	401	503	119	234	282	253	502
CUT_GIM_0378	CUT_GIM_0378	CUT_GIM_0378	100	19	39	20	40	35	558	163	129	231	0	196	8	19	10	116	41	59	7	24	25	31	59	96	107	32	39	14	40	31	48	68	59	57	0	91	28	33	26	57	38	37	27	60	55	28	49
CUT_GIM_0379	CUT_GIM_0379	CUT_GIM_0379	9	3	6	28	29	36	202	39	35	140	1	38	10	24	22	55	22	39	5	17	19	35	26	42	10	5	6	19	29	32	17	16	16	35	14	18	35	42	58	27	20	25	19	43	42	31	21
CUT_GIM_0380	CUT_GIM_0380	CUT_GIM_0380	11	2	6	10	5	10	262	56	45	44	1	14	1	4	3	16	7	10	3	4	3	7	9	11	12	3	6	7	5	9	23	23	20	11	14	7	4	7	8	8	6	6	12	10	7	6	7
CUT_GIM_0381	CUT_GIM_0381	CUT_GIM_0381	0	0	0	2	1	1	8	4	10	1	0	1	0	3	0	0	1	0	0	1	0	0	1	1	0	0	0	1	1	1	1	2	5	0	0	0	0	5	0	0	1	0	0	3	0	0	1
CUT_GIM_0382	CUT_GIM_0382	CUT_GIM_0382	1	0	1	1	0	0	2	0	0	0	0	1	0	0	0	0	0	0	0	0	0	0	1	1	1	0	1	1	0	0	0	0	0	0	0	0	0	0	0	0	0	0	0	0	0	0	1
CUT_GIM_0383	CUT_GIM_0383	CUT_GIM_0383	4	2	3	13	7	7	76	7	7	13	1	10	1	2	1	5	7	18	1	2	1	9	8	11	4	3	3	9	7	6	7	3	3	3	14	5	4	3	3	2	6	11	4	5	2	8	7
CUT_GIM_0384	CUT_GIM_0384	CUT_GIM_0384	0	0	1	0	0	0	16	12	7	1	0	0	1	1	0	0	0	0	0	0	0	2	1	0	0	0	1	0	0	0	1	5	3	0	0	0	4	2	0	0	0	0	0	0	0	2	1
CUT_GIM_0385	CUT_GIM_0385	CUT_GIM_0385	1	1	0	1	0	0	38	14	12	1	0	3	0	0	0	2	3	3	0	0	0	1	0	2	1	2	0	1	0	0	3	6	5	0	0	1	0	0	0	1	3	2	0	0	0	1	0
CUT_GIM_0386	CUT_GIM_0386	CUT_GIM_0386	1	1	1	1	0	1	22	2	4	3	0	1	0	2	1	1	2	4	0	1	1	1	5	4	1	2	1	1	0	1	2	1	2	1	0	0	0	3	3	0	2	3	0	3	2	1	4
CUT_GIM_0387	CUT_GIM_0387	CUT_GIM_0387	2	1	1	2	1	4	68	14	13	7	0	5	0	2	0	5	0	3	0	0	2	0	0	1	2	2	1	1	1	4	6	6	6	2	0	2	0	3	0	2	0	2	0	0	4	0	0
CUT_GIM_0388	CUT_GIM_0388	CUT_GIM_0388	51	43	94	117	256	237	2214	441	374	345	4	123	13	28	21	174	113	234	7	29	38	66	189	215	55	73	93	80	259	210	191	184	170	85	55	57	46	49	55	86	104	147	27	73	84	59	156
CUT_GIM_0389	CUT_GIM_0389	CUT_GIM_0389	3	1	0	1	0	0	58	20	19	1	0	3	0	0	0	2	4	4	0	1	0	1	0	2	3	2	0	1	0	0	5	8	9	0	0	1	0	0	0	1	4	3	0	3	0	1	0
CUT_GIM_0390	CUT_GIM_0390	CUT_GIM_0390	5	2	5	4	3	3	230	52	55	12	1	28	2	2	3	14	3	3	0	3	4	2	1	2	5	3	5	3	3	3	20	22	25	3	14	13	7	3	8	7	3	2	0	8	9	2	1
CUT_GIM_0391	CUT_GIM_0391	CUT_GIM_0391	0	0	1	0	0	0	16	9	34	1	0	0	0	0	0	2	0	1	0	0	0	1	0	0	0	0	1	0	0	0	1	4	15	0	0	0	0	0	0	1	0	1	0	0	0	1	0
CUT_GIM_0392	CUT_GIM_0392	CUT_GIM_0392	34	32	41	76	64	83	380	96	119	176	5	41	12	19	10	69	67	77	4	29	25	37	68	102	36	55	41	52	65	73	33	40	54	43	68	19	43	33	26	34	62	48	15	73	55	33	56
CUT_GIM_0393	CUT_GIM_0393	CUT_GIM_0393	4	2	5	16	21	25	134	74	57	8	1	16	1	4	2	15	5	11	1	5	5	4	13	14	4	3	5	11	21	22	12	31	26	2	14	7	4	7	5	7	5	7	4	13	11	4	11
CUT_GIM_0394	CUT_GIM_0394	CUT_GIM_0394	7	2	4	11	7	8	304	41	41	36	0	18	4	4	2	14	6	14	2	3	0	2	5	8	8	3	4	7	7	7	26	17	19	9	0	8	14	7	5	7	6	9	8	8	0	2	4
CUT_GIM_0395	CUT_GIM_0395	CUT_GIM_0395	0	0	0	1	0	1	20	15	16	5	0	1	1	0	0	1	0	2	1	0	0	1	2	4	0	0	0	1	0	1	2	6	7	1	0	0	4	0	0	0	0	1	4	0	0	1	2
CUT_GIM_0396	CUT_GIM_0396	CUT_GIM_0396	3	0	1	3	3	7	104	32	23	8	0	8	1	0	0	6	2	2	2	1	1	3	4	5	3	0	1	2	3	6	9	13	10	2	0	4	4	0	0	3	2	1	8	3	2	3	3
CUT_GIM_0397	CUT_GIM_0397	CUT_GIM_0397	1	0	1	2	1	0	26	39	54	0	0	1	0	2	0	3	3	2	0	0	0	1	2	5	1	0	1	1	1	0	2	16	25	0	0	0	0	3	0	1	3	1	0	0	0	1	2
CUT_GIM_0398	CUT_GIM_0398	CUT_GIM_0398	0	0	0	0	0	0	6	12	11	0	0	0	0	2	0	1	0	0	1	0	0	0	0	1	0	0	0	0	0	0	1	5	5	0	0	0	0	3	0	0	0	0	4	0	0	0	0
CUT_GIM_0399	CUT_GIM_0399	CUT_GIM_0399	53	15	25	84	95	84	946	205	154	383	1	211	14	41	24	140	63	108	12	27	31	52	67	138	57	26	25	57	96	74	82	85	70	94	14	98	50	71	63	69	58	68	46	68	68	46	55
CUT_GIM_0400	CUT_GIM_0400	CUT_GIM_0400	1	0	0	2	1	0	16	18	20	1	0	2	1	0	0	0	0	0	0	0	0	0	2	0	1	0	0	1	1	0	1	7	9	0	0	1	4	0	0	0	0	0	0	0	0	0	2
CUT_GIM_0401	CUT_GIM_0401	CUT_GIM_0401	7	1	8	4	7	3	180	47	36	27	0	6	0	5	0	6	5	4	0	4	5	7	5	5	8	2	8	3	7	3	16	20	16	7	0	3	0	9	0	3	5	3	0	10	11	6	4
CUT_GIM_0402	CUT_GIM_0402	CUT_GIM_0402	1	0	1	1	1	1	28	4	4	1	0	1	0	1	0	0	2	0	0	0	0	0	0	0	1	0	1	1	1	1	2	2	2	0	0	0	0	2	0	0	2	0	0	0	0	0	0
CUT_GIM_0403	CUT_GIM_0403	CUT_GIM_0403	0	0	0	0	1	0	8	9	15	0	0	2	0	0	0	1	0	1	0	0	0	0	0	0	0	0	0	0	1	0	1	4	7	0	0	1	0	0	0	0	0	1	0	0	0	0	0
CUT_GIM_0404	CUT_GIM_0404	CUT_GIM_0404	0	0	0	2	0	0	2	4	3	0	0	2	0	1	0	1	0	0	0	1	0	3	0	1	0	0	0	1	0	0	0	2	1	0	0	1	0	2	0	0	0	0	0	3	0	3	0
CUT_GIM_0405	CUT_GIM_0405	CUT_GIM_0405	1	0	0	0	1	0	14	18	19	3	0	1	0	0	0	1	1	2	0	1	0	1	0	2	1	0	0	0	1	0	1	7	9	1	0	0	0	0	0	0	1	1	0	3	0	1	0
CUT_GIM_0406	CUT_GIM_0406	CUT_GIM_0406	0	0	1	1	0	0	10	9	7	4	0	0	0	1	1	2	0	1	0	0	0	2	1	0	0	0	1	1	0	0	1	4	3	1	0	0	0	2	3	1	0	1	0	0	0	2	1
CUT_GIM_0407	CUT_GIM_0407	CUT_GIM_0407	3	7	11	15	4	9	308	172	210	20	0	10	0	3	2	18	5	11	1	3	2	3	4	19	3	12	11	10	4	8	27	72	95	5	0	5	0	5	5	9	5	7	4	8	4	3	3
CUT_GIM_0408	CUT_GIM_0408	CUT_GIM_0408	1	2	2	4	2	1	68	27	32	7	0	3	0	0	0	0	1	1	1	0	1	2	1	4	1	3	2	3	2	1	6	11	15	2	0	1	0	0	0	0	1	1	4	0	2	2	1
CUT_GIM_0409	CUT_GIM_0409	CUT_GIM_0409	0	0	0	0	1	2	20	7	11	4	0	3	1	1	0	4	0	2	0	0	1	0	2	2	0	0	0	0	1	2	2	3	5	1	0	1	4	2	0	2	0	1	0	0	2	0	2
CUT_GIM_0410	CUT_GIM_0410	CUT_GIM_0410	0	0	0	0	0	0	8	1	6	0	0	0	0	0	0	0	0	2	0	0	2	0	1	2	0	0	0	0	0	0	1	0	3	0	0	0	0	0	0	0	0	1	0	0	4	0	1
CUT_GIM_0411	CUT_GIM_0411	CUT_GIM_0411	0	5	4	7	3	4	92	28	38	18	0	7	0	1	5	8	4	2	1	0	2	6	1	4	0	9	4	5	3	4	8	12	17	4	0	3	0	2	13	4	4	1	4	0	4	5	1
CUT_GIM_0412	CUT_GIM_0412	CUT_GIM_0412	0	0	3	0	1	0	14	26	34	2	0	0	0	1	1	2	0	0	0	1	0	1	1	0	0	0	3	0	1	0	1	11	15	0	0	0	0	2	3	1	0	0	0	3	0	1	1
CUT_GIM_0413	CUT_GIM_0413	CUT_GIM_0413	13	6	23	20	18	21	248	20	28	101	1	35	1	10	3	27	15	17	2	2	8	16	19	32	14	10	23	14	18	19	21	8	13	25	14	16	4	17	8	13	14	11	8	5	18	14	16
CUT_GIM_0414	CUT_GIM_0414	CUT_GIM_0414	5	0	3	15	4	14	74	4	7	22	0	4	6	6	6	24	3	9	4	1	6	16	3	4	5	0	3	10	4	12	6	2	3	5	0	2	21	10	16	12	3	6	15	3	13	14	2
CUT_GIM_0415	CUT_GIM_0415	CUT_GIM_0415	1	4	4	4	0	0	78	60	70	6	0	5	0	0	0	0	1	1	0	0	1	4	1	3	1	7	4	3	0	0	7	25	32	1	0	2	0	0	0	0	1	1	0	0	2	4	1
CUT_GIM_0416	CUT_GIM_0416	CUT_GIM_0416	7492	2453	5902	1799	2763	2915	24534	3750	3676	17962	134	9225	456	1410	870	8045	7251	13868	302	902	1306	3350	9838	13360	8035	4191	5870	1226	2795	2577	2115	1562	1671	4427	1830	4304	1618	2455	2278	3954	6691	8717	1160	2268	2872	2976	8111
CUT_GIM_0417	CUT_GIM_0417	CUT_GIM_0417	68	18	31	66	154	137	428	78	78	290	0	32	11	51	35	98	139	267	9	35	43	76	135	199	73	31	31	45	156	121	37	32	35	71	0	15	39	89	92	48	128	168	35	88	95	68	111
CUT_GIM_0418	CUT_GIM_0418	CUT_GIM_0418	13	4	9	9	9	11	458	63	66	66	2	71	4	7	9	33	20	25	2	9	6	9	22	38	14	7	9	6	9	10	39	26	30	16	27	33	14	12	24	16	18	16	8	23	13	8	18
CUT_GIM_0419	CUT_GIM_0419	CUT_GIM_0419	1	0	2	6	8	8	122	47	53	11	2	13	2	5	3	9	3	4	0	4	2	2	6	9	1	0	2	4	8	7	11	20	24	3	27	6	7	9	8	4	3	3	0	10	4	2	5
CUT_GIM_0420	CUT_GIM_0420	CUT_GIM_0420	14	9	9	19	14	10	224	37	19	34	1	53	6	5	7	54	24	25	6	7	8	20	22	38	15	15	9	13	14	9	19	15	9	8	14	25	21	9	18	27	22	16	23	18	18	18	18
CUT_GIM_0421	CUT_GIM_0421	CUT_GIM_0421	2	1	4	2	0	0	106	37	23	5	0	3	0	1	0	4	1	2	0	0	0	0	1	1	2	2	4	1	0	0	9	15	10	1	0	1	0	2	0	2	1	1	0	0	0	0	1
CUT_GIM_0422	CUT_GIM_0422	CUT_GIM_0422	2	0	1	1	0	1	18	8	10	5	0	0	0	0	2	2	2	3	0	1	2	1	4	4	2	0	1	1	0	1	2	3	5	1	0	0	0	0	5	1	2	2	0	3	4	1	3
CUT_GIM_0423	CUT_GIM_0423	CUT_GIM_0423	1	1	7	4	1	1	98	69	73	7	0	0	1	2	0	5	2	3	1	1	0	1	2	8	1	2	7	3	1	1	8	29	33	2	0	0	4	3	0	2	2	2	4	3	0	1	2
CUT_GIM_0424	CUT_GIM_0424	CUT_GIM_0424	16	6	18	29	26	36	400	58	57	90	1	48	4	6	10	41	17	26	4	14	11	28	33	30	17	10	18	20	26	32	34	24	26	22	14	22	14	10	26	20	16	16	15	35	24	25	27
CUT_GIM_0425	CUT_GIM_0425	CUT_GIM_0425	101	44	99	441	581	487	1504	415	355	485	11	275	41	80	50	229	177	314	21	55	76	98	208	321	108	75	98	300	588	431	130	173	161	120	150	128	145	139	131	113	163	197	81	138	167	87	171
CUT_GIM_0426	CUT_GIM_0426	CUT_GIM_0426	0	0	2	4	1	1	54	18	14	15	0	6	1	4	4	6	3	8	3	0	4	5	3	11	0	0	2	3	1	1	5	7	6	4	0	3	4	7	10	3	3	5	12	0	9	4	2
CUT_GIM_0427	CUT_GIM_0427	CUT_GIM_0427	0	1	3	3	1	2	54	23	39	13	0	2	1	0	0	4	3	4	0	1	1	2	3	3	0	2	3	2	1	2	5	10	18	3	0	1	4	0	0	2	3	3	0	3	2	2	2
CUT_GIM_0428	CUT_GIM_0428	CUT_GIM_0428	83	51	86	60	43	50	1406	275	281	596	11	465	15	26	18	180	141	235	14	29	16	131	165	215	89	87	86	41	43	44	121	115	128	147	150	217	53	45	47	88	130	148	54	73	35	116	136
CUT_GIM_0429	CUT_GIM_0429	CUT_GIM_0429	0	0	0	0	0	0	6	0	4	0	0	0	0	0	0	0	0	1	0	0	0	0	0	0	0	0	0	0	0	0	1	0	2	0	0	0	0	0	0	0	0	1	0	0	0	0	0
CUT_GIM_0430	CUT_GIM_0430	CUT_GIM_0430	24	21	25	58	36	63	620	143	124	172	5	110	7	27	18	49	34	54	11	17	14	28	39	69	26	36	25	40	36	56	53	60	56	42	68	51	25	47	47	24	31	34	42	43	31	25	32
CUT_GIM_0431	CUT_GIM_0431	CUT_GIM_0431	7898	2563	6342	2591	2907	3432	18210	2703	2309	19569	237	11221	571	1794	1228	11492	9446	15842	484	1088	1653	5261	11279	16277	8471	4379	6308	1765	2940	3034	1570	1126	1049	4823	3236	5235	2025	3123	3215	5648	8716	9958	1858	2736	3636	4674	9300
CUT_GIM_0432	CUT_GIM_0432	CUT_GIM_0432	0	0	0	0	1	0	6	1	3	0	0	1	0	0	0	1	0	0	0	0	1	0	0	0	0	0	0	0	1	0	1	0	1	0	0	0	0	0	0	0	0	0	0	0	2	0	0
CUT_GIM_0433	CUT_GIM_0433	CUT_GIM_0433	5	7	8	19	17	27	122	44	33	17	0	11	1	9	5	6	1	6	0	4	7	6	11	13	5	12	8	13	17	24	11	18	15	4	0	5	4	16	13	3	1	4	0	10	15	5	9
CUT_GIM_0434	CUT_GIM_0434	CUT_GIM_0434	1	1	0	2	1	1	100	38	62	5	0	6	0	2	0	3	0	0	0	0	0	2	2	3	1	2	0	1	1	1	9	16	28	1	0	3	0	3	0	1	0	0	0	0	0	2	2
CUT_GIM_0435	CUT_GIM_0435	CUT_GIM_0435	1	0	2	5	5	5	100	42	42	10	2	13	1	2	2	7	1	3	0	4	2	2	5	6	1	0	2	3	5	4	9	17	19	2	27	6	4	3	5	3	1	2	0	10	4	2	4
CUT_GIM_0436	CUT_GIM_0436	CUT_GIM_0436	0	0	0	0	0	0	0	5	5	0	0	0	0	0	0	1	0	0	0	0	0	0	0	0	0	0	0	0	0	0	0	2	2	0	0	0	0	0	0	0	0	0	0	0	0	0	0
CUT_GIM_0437	CUT_GIM_0437	CUT_GIM_0437	12	1	7	9	4	5	36	5	14	37	0	8	3	2	4	9	8	10	3	4	3	9	2	14	13	2	7	6	4	4	3	2	6	9	0	4	11	3	10	4	7	6	12	10	7	8	2
CUT_GIM_0438	CUT_GIM_0438	CUT_GIM_0438	27	10	21	26	29	38	294	56	26	92	1	70	9	13	12	97	51	62	7	17	18	39	67	97	29	17	21	18	29	34	25	23	12	23	14	33	32	23	31	48	47	39	27	43	40	35	55
CUT_GIM_0439	CUT_GIM_0439	CUT_GIM_0439	57	16	38	46	57	47	744	140	155	311	0	114	12	27	19	87	63	113	9	19	15	48	66	88	61	27	38	31	58	42	64	58	70	77	0	53	43	47	50	43	58	71	35	48	33	43	54
CUT_GIM_0440	CUT_GIM_0440	CUT_GIM_0440	3	3	8	11	8	11	358	63	43	4	0	34	3	4	0	12	3	8	0	2	3	2	5	9	3	5	8	7	8	10	31	26	20	1	0	16	11	7	0	6	3	5	0	5	7	2	4
CUT_GIM_0441	CUT_GIM_0441	CUT_GIM_0441	1	0	1	4	0	4	34	7	9	6	0	2	1	2	0	4	1	1	0	1	0	2	1	3	1	0	1	3	0	4	3	3	4	1	0	1	4	3	0	2	1	1	0	3	0	2	1
CUT_GIM_0442	CUT_GIM_0442	CUT_GIM_0442	3	1	2	7	5	9	128	16	19	34	0	11	1	5	5	12	11	16	0	3	5	9	2	18	3	2	2	5	5	8	11	7	9	8	0	5	4	9	13	6	10	10	0	8	11	8	2
CUT_GIM_0443	CUT_GIM_0443	CUT_GIM_0443	0	1	0	0	1	1	38	19	26	11	0	0	0	0	0	6	0	0	0	0	2	2	1	3	0	2	0	0	1	1	3	8	12	3	0	0	0	0	0	3	0	0	0	0	4	2	1
CUT_GIM_0444	CUT_GIM_0444	CUT_GIM_0444	5	1	2	1	5	3	76	18	24	23	1	1	2	1	3	17	1	7	2	1	2	7	4	12	5	2	2	1	5	3	7	7	11	6	14	0	7	2	8	8	1	4	8	3	4	6	3
CUT_GIM_0445	CUT_GIM_0445	CUT_GIM_0445	445	55	163	219	412	501	1152	140	151	1534	7	1120	38	113	101	702	479	770	33	110	134	284	554	791	477	94	162	149	417	443	99	58	69	378	96	523	135	197	264	345	442	484	127	277	295	252	457
CUT_GIM_0446	CUT_GIM_0446	CUT_GIM_0446	0	1	2	5	0	1	18	30	31	2	0	0	0	4	0	2	3	4	0	0	0	1	0	4	0	2	2	3	0	1	2	12	14	0	0	0	0	7	0	1	3	3	0	0	0	1	0
CUT_GIM_0447	CUT_GIM_0447	CUT_GIM_0447	70	22	34	91	345	288	336	92	91	285	5	69	9	46	28	115	82	195	10	35	38	79	127	173	75	38	34	62	349	255	29	38	41	70	68	32	32	80	73	57	76	123	38	88	84	70	105
CUT_GIM_0448	CUT_GIM_0448	CUT_GIM_0448	1	2	2	8	3	7	18	15	15	7	0	3	0	1	2	0	4	6	0	2	2	1	7	7	1	3	2	5	3	6	2	6	7	2	0	1	0	2	5	0	4	4	0	5	4	1	6
CUT_GIM_0449	CUT_GIM_0449	CUT_GIM_0449	6	2	9	7	3	3	428	125	107	36	0	13	0	2	1	11	3	7	1	3	3	2	9	5	6	3	9	5	3	3	37	52	49	9	0	6	0	3	3	5	3	4	4	8	7	2	7
CUT_GIM_0450	CUT_GIM_0450	CUT_GIM_0450	0	2	6	7	0	2	160	88	111	11	0	10	1	0	1	12	0	2	1	2	0	11	3	2	0	3	6	5	0	2	14	37	50	3	0	5	4	0	3	6	0	1	4	5	0	10	2
CUT_GIM_0451	CUT_GIM_0451	CUT_GIM_0451	73	27	51	77	41	47	1476	171	203	221	2	139	15	27	14	71	35	60	15	9	10	41	37	86	78	46	51	52	41	42	127	71	92	54	27	65	53	47	37	35	32	38	58	23	22	36	31
CUT_GIM_0452	CUT_GIM_0452	CUT_GIM_0452	1	0	0	3	1	0	12	7	5	17	0	3	2	0	0	3	2	2	0	1	2	2	3	4	1	0	0	2	1	0	1	3	2	4	0	1	7	0	0	1	2	1	0	3	4	2	2
CUT_GIM_0453	CUT_GIM_0453	CUT_GIM_0453	0	0	1	0	0	0	6	4	8	0	0	0	0	0	0	1	0	0	0	0	0	0	0	1	0	0	1	0	0	0	1	2	4	0	0	0	0	0	0	0	0	0	0	0	0	0	0
CUT_GIM_0454	CUT_GIM_0454	CUT_GIM_0454	0	0	0	4	0	1	8	4	9	0	0	0	0	1	0	0	0	0	0	0	0	0	0	2	0	0	0	3	0	1	1	2	4	0	0	0	0	2	0	0	0	0	0	0	0	0	0
CUT_GIM_0455	CUT_GIM_0455	CUT_GIM_0455	0	1	0	0	0	0	18	7	3	1	0	1	0	0	0	3	0	0	0	0	0	1	0	2	0	2	0	0	0	0	2	3	1	0	0	0	0	0	0	1	0	0	0	0	0	1	0
CUT_GIM_0456	CUT_GIM_0456	CUT_GIM_0456	0	0	0	1	0	0	8	17	14	0	0	1	0	0	0	2	1	0	0	0	0	0	0	2	0	0	0	1	0	0	1	7	6	0	0	0	0	0	0	1	1	0	0	0	0	0	0
CUT_GIM_0457	CUT_GIM_0457	CUT_GIM_0457	13	8	23	28	23	33	448	92	89	100	0	52	11	14	2	39	26	38	1	14	7	20	18	43	14	14	23	19	23	29	39	38	40	25	0	24	39	24	5	19	24	24	4	35	15	18	15
CUT_GIM_0458	CUT_GIM_0458	CUT_GIM_0458	0	0	2	0	1	0	22	30	40	0	0	0	0	2	0	2	0	3	0	1	0	1	0	0	0	0	2	0	1	0	2	12	18	0	0	0	0	3	0	1	0	2	0	3	0	1	0
CUT_GIM_0459	CUT_GIM_0459	CUT_GIM_0459	6	2	10	15	21	21	160	28	26	47	0	24	1	4	4	24	15	16	1	3	1	15	14	24	6	3	10	10	21	19	14	12	12	12	0	11	4	7	10	12	14	10	4	8	2	13	12
CUT_GIM_0460	CUT_GIM_0460	CUT_GIM_0460	0	2	1	0	1	1	32	26	38	10	0	14	1	3	0	10	3	6	1	0	0	5	4	8	0	3	1	0	1	1	3	11	17	2	0	7	4	5	0	5	3	4	4	0	0	4	3
CUT_GIM_0461	CUT_GIM_0461	CUT_GIM_0461	0	1	2	3	2	2	58	38	32	11	0	3	1	1	2	8	3	4	1	2	0	3	4	5	0	2	2	2	2	2	5	16	15	3	0	1	4	2	5	4	3	3	4	5	0	3	3
CUT_GIM_0462	CUT_GIM_0462	CUT_GIM_0462	2	0	4	8	9	5	94	30	31	21	0	14	2	1	2	7	2	8	0	3	1	4	5	9	2	0	4	5	9	4	8	12	14	5	0	7	7	2	5	3	2	5	0	8	2	4	4
CUT_GIM_0463	CUT_GIM_0463	CUT_GIM_0463	1	1	1	4	0	4	14	19	19	1	0	2	1	0	1	5	3	4	0	1	0	2	4	4	1	2	1	3	0	4	1	8	9	0	0	1	4	0	3	2	3	3	0	3	0	2	3
CUT_GIM_0464	CUT_GIM_0464	CUT_GIM_0464	21	10	17	11	26	15	582	176	134	56	3	22	2	8	10	20	8	19	5	1	11	4	16	23	23	17	17	7	26	13	50	73	61	14	41	10	7	14	26	10	7	12	19	3	24	4	13
CUT_GIM_0465	CUT_GIM_0465	CUT_GIM_0465	0	0	0	1	0	1	12	2	2	3	0	0	0	2	0	3	1	0	0	1	1	2	0	1	0	0	0	1	0	1	1	1	1	1	0	0	0	3	0	1	1	0	0	3	2	2	0
CUT_GIM_0466	CUT_GIM_0466	CUT_GIM_0466	35	47	64	130	67	66	1728	340	257	185	1	91	31	79	30	160	25	81	32	54	50	74	44	77	38	80	64	89	68	58	149	142	117	46	14	42	110	138	79	79	23	51	123	136	110	66	36
CUT_GIM_0467	CUT_GIM_0467	CUT_GIM_0467	7	1	8	47	37	28	236	28	30	108	1	32	8	8	7	33	23	20	5	12	8	28	21	41	8	2	8	32	37	25	20	12	14	27	14	15	28	14	18	16	21	13	19	30	18	25	17
CUT_GIM_0468	CUT_GIM_0468	CUT_GIM_0468	21	4	14	47	22	33	254	72	66	89	1	42	14	21	19	75	31	52	9	21	22	46	29	73	23	7	14	32	22	29	22	30	30	22	14	20	50	37	50	37	29	33	35	53	48	41	24
CUT_GIM_0469	CUT_GIM_0469	CUT_GIM_0469	152	22	52	26	78	114	320	18	17	693	1	210	8	45	21	276	173	313	3	25	31	107	220	336	163	38	52	18	79	101	28	7	8	171	14	98	28	78	55	136	160	197	12	63	68	95	181
CUT_GIM_0470	CUT_GIM_0470	CUT_GIM_0470	0	0	0	0	0	0	10	7	3	2	0	0	0	0	0	1	0	0	0	0	1	0	0	1	0	0	0	0	0	0	1	3	1	0	0	0	0	0	0	0	0	0	0	0	2	0	0
CUT_GIM_0471	CUT_GIM_0471	CUT_GIM_0471	8	4	2	16	12	14	108	41	33	28	0	16	1	7	2	14	6	9	3	4	4	3	7	9	9	7	2	11	12	12	9	17	15	7	0	7	4	12	5	7	6	6	12	10	9	3	6
CUT_GIM_0472	CUT_GIM_0472	CUT_GIM_0472	0	0	1	0	0	0	6	3	5	0	0	0	0	0	0	1	1	0	0	0	0	0	1	0	0	0	1	0	0	0	1	1	2	0	0	0	0	0	0	0	1	0	0	0	0	0	1
CUT_GIM_0473	CUT_GIM_0473	CUT_GIM_0473	8	2	3	2	18	34	54	3	2	38	0	4	2	4	7	23	21	34	1	5	5	15	23	36	9	3	3	1	18	30	5	1	1	9	0	2	7	7	18	11	19	21	4	13	11	13	19
CUT_GIM_0474	CUT_GIM_0474	CUT_GIM_0474	1	0	0	3	5	3	14	6	1	5	0	1	1	2	0	2	1	2	0	0	1	2	7	10	1	0	0	2	5	3	1	2	0	1	0	0	4	3	0	1	1	1	0	0	2	2	6
CUT_GIM_0475	CUT_GIM_0475	CUT_GIM_0475	0	1	2	0	0	0	28	12	11	5	0	2	0	0	0	1	0	0	0	0	0	0	0	3	0	2	2	0	0	0	2	5	5	1	0	1	0	0	0	0	0	0	0	0	0	0	0
CUT_GIM_0476	CUT_GIM_0476	CUT_GIM_0476	463	71	191	241	470	556	1280	167	159	1625	8	1224	41	132	111	777	529	845	38	121	148	310	603	865	497	121	190	164	475	492	110	70	72	400	109	571	145	230	291	382	488	531	146	304	326	275	497
CUT_GIM_0477	CUT_GIM_0477	CUT_GIM_0477	1	0	1	2	1	1	38	14	13	5	0	2	1	0	0	7	3	2	0	1	0	0	1	1	1	0	1	1	1	1	3	6	6	1	0	1	4	0	0	3	3	1	0	3	0	0	1
CUT_GIM_0478	CUT_GIM_0478	CUT_GIM_0478	0	0	0	0	1	0	0	3	0	2	0	0	0	0	0	0	0	0	0	0	0	1	0	0	0	0	0	0	1	0	0	1	0	0	0	0	0	0	0	0	0	0	0	0	0	1	0
CUT_GIM_0479	CUT_GIM_0479	CUT_GIM_0479	1	3	1	3	6	1	88	30	36	3	0	5	1	0	0	4	7	2	1	1	1	3	1	2	1	5	1	2	6	1	8	12	16	1	0	2	4	0	0	2	6	1	4	3	2	3	1
CUT_GIM_0480	CUT_GIM_0480	CUT_GIM_0480	1	0	2	0	1	1	34	17	9	2	0	0	0	0	0	0	2	1	0	0	1	1	1	0	1	0	2	0	1	1	3	7	4	0	0	0	0	0	0	0	2	1	0	0	2	1	1
CUT_GIM_0481	CUT_GIM_0481	CUT_GIM_0481	8	7	6	7	9	8	150	23	10	36	1	26	7	3	1	27	6	10	1	2	7	7	6	18	9	12	6	5	9	7	13	10	5	9	14	12	25	5	3	13	6	6	4	5	15	6	5
CUT_GIM_0482	CUT_GIM_0482	CUT_GIM_0482	6	1	5	9	6	5	258	55	50	27	0	19	1	4	2	23	7	6	2	2	3	8	3	10	6	2	5	6	6	4	22	23	23	7	0	9	4	7	5	11	6	4	8	5	7	7	2
CUT_GIM_0483	CUT_GIM_0483	CUT_GIM_0483	4	3	7	3	3	7	200	59	52	13	0	8	2	2	2	8	1	0	1	0	0	4	3	3	4	5	7	2	3	6	17	25	24	3	0	4	7	3	5	4	1	0	4	0	0	4	2
CUT_GIM_0484	CUT_GIM_0484	CUT_GIM_0484	0	0	1	0	0	0	16	13	21	1	0	0	0	2	0	1	1	0	0	0	0	0	0	1	0	0	1	0	0	0	1	5	10	0	0	0	0	3	0	0	1	0	0	0	0	0	0
CUT_GIM_0485	CUT_GIM_0485	CUT_GIM_0485	19	11	20	76	68	64	614	176	161	141	3	90	8	18	21	58	29	64	6	20	15	29	47	79	20	19	20	52	69	57	53	73	73	35	41	42	28	31	55	29	27	40	23	50	33	26	39
CUT_GIM_0486	CUT_GIM_0486	CUT_GIM_0486	1	2	6	15	13	9	206	25	27	18	0	6	2	2	4	14	5	6	2	3	3	8	4	5	1	3	6	10	13	8	18	10	12	4	0	3	7	3	10	7	5	4	8	8	7	7	3
CUT_GIM_0487	CUT_GIM_0487	CUT_GIM_0487	1	0	0	1	0	1	16	8	18	3	0	2	0	2	0	3	0	0	1	0	0	1	1	4	1	0	0	1	0	1	1	3	8	1	0	1	0	3	0	1	0	0	4	0	0	1	1
CUT_GIM_0488	CUT_GIM_0488	CUT_GIM_0488	67	19	53	31	18	31	1098	124	119	711	3	184	4	22	17	133	83	120	7	17	14	78	78	128	72	32	53	21	18	27	95	52	54	175	41	86	14	38	45	65	77	75	27	43	31	69	64
CUT_GIM_0489	CUT_GIM_0489	CUT_GIM_0489	2	2	6	25	13	23	178	43	56	41	0	24	1	8	3	8	4	12	5	7	4	2	9	8	2	3	6	17	13	20	15	18	25	10	0	11	4	14	8	4	4	8	19	18	9	2	7
CUT_GIM_0490	CUT_GIM_0490	CUT_GIM_0490	61	12	37	26	46	60	230	33	39	264	1	57	3	18	15	121	81	141	3	14	16	68	78	124	65	21	37	18	47	53	20	14	18	65	14	27	11	31	39	59	75	89	12	35	35	60	64
CUT_GIM_0491	CUT_GIM_0491	CUT_GIM_0491	19	12	21	30	29	16	496	123	86	60	1	57	1	13	6	20	28	16	1	4	9	8	17	30	20	21	21	20	29	14	43	51	39	15	14	27	4	23	16	10	26	10	4	10	20	7	14
CUT_GIM_0492	CUT_GIM_0492	CUT_GIM_0492	3	2	2	21	12	16	72	15	24	10	0	6	5	5	3	6	4	7	2	6	1	4	5	8	3	3	2	14	12	14	6	6	11	2	0	3	18	9	8	3	4	4	8	15	2	4	4
CUT_GIM_0493	CUT_GIM_0493	CUT_GIM_0493	2	0	1	0	0	0	12	8	14	3	0	1	0	0	1	0	0	1	0	0	0	1	0	0	2	0	1	0	0	0	1	3	6	1	0	0	0	0	3	0	0	1	0	0	0	1	0
CUT_GIM_0494	CUT_GIM_0494	CUT_GIM_0494	0	1	3	3	0	3	90	24	16	7	0	4	0	0	1	5	2	1	0	0	0	2	1	4	0	2	3	2	0	3	8	10	7	2	0	2	0	0	3	2	2	1	0	0	0	2	1
CUT_GIM_0495	CUT_GIM_0495	CUT_GIM_0495	10	3	10	3	3	4	120	67	61	28	0	10	1	6	4	18	8	21	4	5	5	10	10	20	11	5	10	2	3	4	10	28	28	7	0	5	4	10	10	9	7	13	15	13	11	9	8
CUT_GIM_0496	CUT_GIM_0496	CUT_GIM_0496	3	1	2	1	1	0	134	27	16	10	0	7	1	1	1	1	1	2	1	0	0	1	1	5	3	2	2	1	1	0	12	11	7	2	0	3	4	2	3	0	1	1	4	0	0	1	1
CUT_GIM_0497	CUT_GIM_0497	CUT_GIM_0497	178	39	87	45	93	119	740	80	60	762	1	626	13	42	30	291	188	352	13	31	28	132	229	388	191	67	87	31	94	105	64	33	27	188	14	292	46	73	79	143	173	221	50	78	62	117	189
CUT_GIM_0498	CUT_GIM_0498	CUT_GIM_0498	9	3	9	22	17	14	184	104	96	58	1	29	6	6	6	24	17	25	0	5	6	11	16	26	10	5	9	15	17	12	16	43	44	14	14	14	21	10	16	12	16	16	0	13	13	10	13
CUT_GIM_0499	CUT_GIM_0499	CUT_GIM_0499	3	3	8	9	6	11	312	56	40	4	0	31	1	3	0	12	3	7	0	1	3	2	4	9	3	5	8	6	6	10	27	23	18	1	0	14	4	5	0	6	3	4	0	3	7	2	3
CUT_GIM_0500	CUT_GIM_0500	CUT_GIM_0500	6	1	5	9	3	1	76	34	32	18	1	8	0	2	0	3	3	3	0	0	2	1	2	5	6	2	5	6	3	1	7	14	15	4	14	4	0	3	0	1	3	2	0	0	4	1	2
CUT_GIM_0501	CUT_GIM_0501	CUT_GIM_0501	1	1	0	1	0	1	36	23	29	4	0	3	0	1	0	5	0	1	0	1	0	2	0	4	1	2	0	1	0	1	3	10	13	1	0	1	0	2	0	2	0	1	0	3	0	2	0
CUT_GIM_0502	CUT_GIM_0502	CUT_GIM_0502	4	5	5	18	17	21	144	25	23	37	1	12	1	5	1	14	4	13	6	3	2	7	8	13	4	9	5	12	17	19	12	10	10	9	14	6	4	9	3	7	4	8	23	8	4	6	7
CUT_GIM_0503	CUT_GIM_0503	CUT_GIM_0503	2	5	5	5	6	6	60	38	23	17	1	6	1	4	3	13	7	11	0	3	2	6	6	20	2	9	5	3	6	5	5	16	10	4	14	3	4	7	8	6	6	7	0	8	4	5	5
CUT_GIM_0504	CUT_GIM_0504	CUT_GIM_0504	2	1	1	5	1	7	16	3	3	3	0	1	0	1	1	6	3	4	0	0	2	6	4	3	2	2	1	3	1	6	1	1	1	1	0	0	0	2	3	3	3	3	0	0	4	5	3
CUT_GIM_0505	CUT_GIM_0505	CUT_GIM_0505	35	47	65	137	68	67	1732	347	259	185	1	92	31	80	30	160	25	81	32	55	50	75	44	77	38	80	65	93	69	59	149	145	118	46	14	43	110	139	79	79	23	51	123	138	110	67	36
CUT_GIM_0506	CUT_GIM_0506	CUT_GIM_0506	0	0	0	0	0	0	2	4	4	1	0	0	0	0	0	0	0	0	0	0	0	0	0	0	0	0	0	0	0	0	0	2	2	0	0	0	0	0	0	0	0	0	0	0	0	0	0
CUT_GIM_0507	CUT_GIM_0507	CUT_GIM_0507	153	25	48	32	40	65	306	54	51	415	0	169	10	25	14	193	76	137	4	12	27	83	93	176	164	43	48	22	40	57	26	22	23	102	0	79	35	44	37	95	70	86	15	30	59	74	77
CUT_GIM_0508	CUT_GIM_0508	CUT_GIM_0508	1	1	1	4	4	2	84	18	25	18	0	5	2	3	0	3	4	8	1	1	0	2	4	5	1	2	1	3	4	2	7	7	11	4	0	2	7	5	0	1	4	5	4	3	0	2	3
CUT_GIM_0509	CUT_GIM_0509	CUT_GIM_0509	2	3	3	7	5	6	96	43	43	11	0	3	2	1	0	12	10	4	2	2	2	4	7	10	2	5	3	5	5	5	8	18	20	3	0	1	7	2	0	6	9	3	8	5	4	4	6
CUT_GIM_0510	CUT_GIM_0510	CUT_GIM_0510	0	1	1	1	2	2	34	5	14	4	0	0	2	1	0	3	0	1	0	0	0	1	2	0	0	2	1	1	2	2	3	2	6	1	0	0	7	2	0	1	0	1	0	0	0	1	2
CUT_GIM_0511	CUT_GIM_0511	CUT_GIM_0511	1	0	0	0	1	0	0	3	0	4	0	0	0	0	0	0	0	2	0	0	0	1	0	0	1	0	0	0	1	0	0	1	0	1	0	0	0	0	0	0	0	1	0	0	0	1	0
CUT_GIM_0512	CUT_GIM_0512	CUT_GIM_0512	237	54	180	52	77	74	2334	148	227	963	2	939	19	43	33	465	232	335	13	37	56	118	384	529	254	92	179	35	78	65	201	62	103	237	27	438	67	75	86	229	214	211	50	93	123	105	317
CUT_GIM_0513	CUT_GIM_0513	CUT_GIM_0513	0	0	2	0	0	0	18	14	11	2	0	0	0	0	0	0	0	0	0	0	1	0	0	0	0	0	2	0	0	0	2	6	5	0	0	0	0	0	0	0	0	0	0	0	2	0	0
CUT_GIM_0514	CUT_GIM_0514	CUT_GIM_0514	14	4	6	15	5	3	196	52	58	65	0	17	2	6	1	13	10	7	2	9	2	6	9	21	15	7	6	10	5	3	17	22	26	16	0	8	7	10	3	6	9	4	8	23	4	5	7
CUT_GIM_0515	CUT_GIM_0515	CUT_GIM_0515	1	0	1	2	1	1	44	14	20	6	0	1	1	1	0	2	1	2	0	0	0	0	2	1	1	0	1	1	1	1	4	6	9	1	0	0	4	2	0	1	1	1	0	0	0	0	2
CUT_GIM_0516	CUT_GIM_0516	CUT_GIM_0516	1	2	2	0	1	2	80	41	31	10	0	3	1	0	2	4	0	1	3	0	0	0	0	0	1	3	2	0	1	2	7	17	14	2	0	1	4	0	5	2	0	1	12	0	0	0	0
CUT_GIM_0517	CUT_GIM_0517	CUT_GIM_0517	0	0	0	3	0	0	42	10	18	4	0	0	0	1	1	0	0	0	0	0	2	2	1	5	0	0	0	2	0	0	4	4	8	1	0	0	0	2	3	0	0	0	0	0	4	2	1
CUT_GIM_0518	CUT_GIM_0518	CUT_GIM_0518	2	3	4	13	6	7	240	40	32	25	1	16	3	1	0	13	2	8	0	2	4	8	2	14	2	5	4	9	6	6	21	17	15	6	14	7	11	2	0	6	2	5	0	5	9	7	2
CUT_GIM_0519	CUT_GIM_0519	CUT_GIM_0519	1	0	3	5	1	2	106	36	39	10	0	5	1	5	0	2	4	4	2	0	2	3	0	7	1	0	3	3	1	2	9	15	18	2	0	2	4	9	0	1	4	3	8	0	4	3	0
CUT_GIM_0520	CUT_GIM_0520	CUT_GIM_0520	2	1	0	7	2	0	54	14	12	5	0	4	1	1	0	1	2	1	2	1	0	2	1	1	2	2	0	5	2	0	5	6	5	1	0	2	4	2	0	0	2	1	8	3	0	2	1
CUT_GIM_0521	CUT_GIM_0521	CUT_GIM_0521	1	2	2	3	2	1	54	38	35	9	0	2	0	1	1	4	2	1	0	1	1	1	1	2	1	3	2	2	2	1	5	16	16	2	0	1	0	2	3	2	2	1	0	3	2	1	1
CUT_GIM_0522	CUT_GIM_0522	CUT_GIM_0522	7	2	6	8	0	11	114	17	31	20	0	11	1	2	1	8	2	6	1	3	2	3	3	5	8	3	6	5	0	10	10	7	14	5	0	5	4	3	3	4	2	4	4	8	4	3	2
CUT_GIM_0523	CUT_GIM_0523	CUT_GIM_0523	0	0	0	0	0	0	0	3	2	0	0	0	0	0	0	0	0	0	0	0	0	0	0	0	0	0	0	0	0	0	0	1	1	0	0	0	0	0	0	0	0	0	0	0	0	0	0
CUT_GIM_0524	CUT_GIM_0524	CUT_GIM_0524	1	3	4	1	2	3	74	24	28	16	0	15	0	1	1	7	2	3	0	0	1	4	2	3	1	5	4	1	2	3	6	10	13	4	0	7	0	2	3	3	2	2	0	0	2	4	2
CUT_GIM_0525	CUT_GIM_0525	CUT_GIM_0525	0	3	5	4	1	1	58	52	78	3	0	2	0	0	0	6	2	2	0	0	1	2	2	5	0	5	5	3	1	1	5	22	35	1	0	1	0	0	0	3	2	1	0	0	2	2	2
CUT_GIM_0526	CUT_GIM_0526	CUT_GIM_0526	19	8	8	7	2	9	242	38	42	73	0	27	1	4	3	34	11	18	4	4	3	14	16	22	20	14	8	5	2	8	21	16	19	18	0	13	4	7	8	17	10	11	15	10	7	12	13
CUT_GIM_0527	CUT_GIM_0527	CUT_GIM_0527	0	0	0	0	0	0	12	6	4	0	0	0	0	0	0	0	0	0	0	0	0	0	0	0	0	0	0	0	0	0	1	2	2	0	0	0	0	0	0	0	0	0	0	0	0	0	0
CUT_GIM_0528	CUT_GIM_0528	CUT_GIM_0528	1	0	3	0	0	0	30	66	65	6	0	1	1	0	2	11	0	2	0	0	0	3	5	4	1	0	3	0	0	0	3	27	30	1	0	0	4	0	5	5	0	1	0	0	0	3	4
CUT_GIM_0529	CUT_GIM_0529	CUT_GIM_0529	5	2	3	12	1	9	194	74	80	13	0	5	3	0	0	13	3	9	0	2	2	5	2	5	5	3	3	8	1	8	17	31	36	3	0	2	11	0	0	6	3	6	0	5	4	4	2
CUT_GIM_0530	CUT_GIM_0530	CUT_GIM_0530	0	2	0	5	0	1	30	12	18	6	0	0	1	0	0	2	0	1	0	0	1	1	0	1	0	3	0	3	0	1	3	5	8	1	0	0	4	0	0	1	0	1	0	0	2	1	0
CUT_GIM_0531	CUT_GIM_0531	CUT_GIM_0531	1	2	1	2	0	1	60	32	39	9	0	2	1	3	0	9	4	6	0	0	1	5	2	4	1	3	1	1	0	1	5	13	18	2	0	1	4	5	0	4	4	4	0	0	2	4	2
CUT_GIM_0532	CUT_GIM_0532	CUT_GIM_0532	0	1	0	0	0	0	36	19	13	2	0	0	0	0	0	4	0	0	0	0	0	1	1	0	0	2	0	0	0	0	3	8	6	0	0	0	0	0	0	2	0	0	0	0	0	1	1
CUT_GIM_0533	CUT_GIM_0533	CUT_GIM_0533	26	8	14	89	37	34	1192	230	203	99	0	48	10	11	5	46	15	23	8	17	12	22	20	27	28	14	14	61	37	30	103	96	92	24	0	22	35	19	13	23	14	14	31	43	26	20	16
CUT_GIM_0534	CUT_GIM_0534	CUT_GIM_0534	0	1	1	0	0	0	4	0	6	1	0	0	0	0	0	0	0	1	0	0	0	0	0	0	0	2	1	0	0	0	0	0	3	0	0	0	0	0	0	0	0	1	0	0	0	0	0
CUT_GIM_0535	CUT_GIM_0535	CUT_GIM_0535	1	0	0	1	0	0	22	30	22	0	0	1	0	0	0	1	0	1	1	0	0	0	0	2	1	0	0	1	0	0	2	12	10	0	0	0	0	0	0	0	0	1	4	0	0	0	0
CUT_GIM_0536	CUT_GIM_0536	CUT_GIM_0536	1	1	0	1	0	0	30	11	25	1	0	0	0	0	0	0	0	0	0	0	0	1	0	0	1	2	0	1	0	0	3	5	11	0	0	0	0	0	0	0	0	0	0	0	0	1	0
CUT_GIM_0537	CUT_GIM_0537	CUT_GIM_0537	0	0	0	0	0	1	12	1	1	5	0	1	0	1	0	0	2	0	0	0	1	0	0	0	0	0	0	0	0	1	1	0	0	1	0	0	0	2	0	0	2	0	0	0	2	0	0
CUT_GIM_0538	CUT_GIM_0538	CUT_GIM_0538	47	46	73	188	163	153	3108	466	406	177	3	137	24	45	34	131	54	83	9	28	37	52	81	153	50	79	73	128	165	135	268	194	185	44	41	64	85	78	89	64	50	52	35	70	81	46	67
CUT_GIM_0539	CUT_GIM_0539	CUT_GIM_0539	2	0	0	2	1	3	34	5	7	4	0	1	0	0	0	10	0	2	1	0	1	2	3	6	2	0	0	1	1	3	3	2	3	1	0	0	0	0	0	5	0	1	4	0	2	2	2
CUT_GIM_0540	CUT_GIM_0540	CUT_GIM_0540	5	0	4	7	3	5	134	25	17	20	0	10	1	1	1	8	2	7	1	2	0	4	3	11	5	0	4	5	3	4	12	10	8	5	0	5	4	2	3	4	2	4	4	5	0	4	2
CUT_GIM_0541	CUT_GIM_0541	CUT_GIM_0541	0	3	5	4	1	1	64	56	83	3	0	4	0	0	0	6	2	2	0	0	1	2	2	5	0	5	5	3	1	1	6	23	38	1	0	2	0	0	0	3	2	1	0	0	2	2	2
CUT_GIM_0542	CUT_GIM_0542	CUT_GIM_0542	0	0	2	1	0	0	38	5	9	16	0	7	2	0	0	4	1	2	0	1	4	1	2	4	0	0	2	1	0	0	3	2	4	4	0	3	7	0	0	2	1	1	0	3	9	1	2
CUT_GIM_0543	CUT_GIM_0543	CUT_GIM_0543	5	1	6	7	6	6	322	65	84	22	0	15	4	4	4	18	10	13	0	4	4	3	9	26	5	2	6	5	6	5	28	27	38	5	0	7	14	7	10	9	9	8	0	10	9	3	7
CUT_GIM_0544	CUT_GIM_0544	CUT_GIM_0544	0	1	2	3	0	5	20	4	6	3	0	4	0	0	0	1	0	3	1	1	0	1	2	0	0	2	2	2	0	4	2	2	3	1	0	2	0	0	0	0	0	2	4	3	0	1	2
CUT_GIM_0545	CUT_GIM_0545	CUT_GIM_0545	1	3	1	4	1	2	94	67	57	6	0	3	1	1	1	3	2	3	2	1	2	0	0	2	1	5	1	3	1	2	8	28	26	1	0	1	4	2	3	1	2	2	8	3	4	0	0
CUT_GIM_0546	CUT_GIM_0546	CUT_GIM_0546	0	0	1	1	0	0	20	23	43	0	0	0	0	2	0	1	1	2	0	0	0	1	1	1	0	0	1	1	0	0	2	10	20	0	0	0	0	3	0	0	1	1	0	0	0	1	1
CUT_GIM_0547	CUT_GIM_0547	CUT_GIM_0547	1	1	0	0	0	1	34	10	25	3	0	2	0	0	0	2	1	1	0	0	0	0	0	6	1	2	0	0	0	1	3	4	11	1	0	1	0	0	0	1	1	1	0	0	0	0	0
CUT_GIM_0548	CUT_GIM_0548	CUT_GIM_0548	0	1	1	0	0	0	18	7	14	2	0	0	0	0	0	0	0	2	0	0	0	0	0	1	0	2	1	0	0	0	2	3	6	0	0	0	0	0	0	0	0	1	0	0	0	0	0
CUT_GIM_0549	CUT_GIM_0549	CUT_GIM_0549	121	58	133	118	145	107	4494	1490	1146	813	10	1476	29	84	48	289	192	267	27	59	74	118	342	387	130	99	132	80	147	95	387	620	521	200	137	689	103	146	126	142	177	168	104	148	163	105	282
CUT_GIM_0550	CUT_GIM_0550	CUT_GIM_0550	16	39	51	54	29	29	816	200	131	126	1	40	12	33	18	69	35	49	14	16	30	32	47	59	17	67	51	37	29	26	70	83	60	31	14	19	43	57	47	34	32	31	54	40	66	28	39
CUT_GIM_0551	CUT_GIM_0551	CUT_GIM_0551	8	2	4	7	8	13	114	17	26	26	0	11	1	1	4	18	10	17	0	5	2	13	7	25	9	3	4	5	8	11	10	7	12	6	0	5	4	2	10	9	9	11	0	13	4	12	6
CUT_GIM_0552	CUT_GIM_0552	CUT_GIM_0552	1	1	1	4	1	0	76	16	28	5	0	2	0	2	1	3	1	6	1	1	0	0	2	2	1	2	1	3	1	0	7	7	13	1	0	1	0	3	3	1	1	4	4	3	0	0	2
CUT_GIM_0553	CUT_GIM_0553	CUT_GIM_0553	4	4	6	24	13	13	174	40	35	55	0	27	6	5	5	16	10	10	2	8	4	7	9	15	4	7	6	16	13	11	15	17	16	14	0	13	21	9	13	8	9	6	8	20	9	6	7
CUT_GIM_0554	CUT_GIM_0554	CUT_GIM_0554	1	0	0	1	1	1	20	14	19	3	0	5	0	0	1	1	2	1	0	0	0	0	1	1	1	0	0	1	1	1	2	6	9	1	0	2	0	0	3	0	2	1	0	0	0	0	1
CUT_GIM_0555	CUT_GIM_0555	CUT_GIM_0555	15	8	17	14	65	55	512	147	118	42	0	19	3	11	3	52	36	33	1	10	7	13	28	53	16	14	17	10	66	49	44	61	54	10	0	9	11	19	8	26	33	21	4	25	15	12	23
CUT_GIM_0556	CUT_GIM_0556	CUT_GIM_0556	0	0	2	4	1	1	12	8	11	3	0	0	1	0	0	1	0	0	0	0	0	2	1	3	0	0	2	3	1	1	1	3	5	1	0	0	4	0	0	0	0	0	0	0	0	2	1
CUT_GIM_0557	CUT_GIM_0557	CUT_GIM_0557	1	0	1	2	1	1	96	24	20	5	0	9	0	1	0	3	1	0	1	1	0	1	4	4	1	0	1	1	1	1	8	10	9	1	0	4	0	2	0	1	1	0	4	3	0	1	3
CUT_GIM_0558	CUT_GIM_0558	CUT_GIM_0558	3	1	4	10	5	9	110	19	30	11	0	6	2	2	2	8	2	3	0	0	1	1	2	7	3	2	4	7	5	8	9	8	14	3	0	3	7	3	5	4	2	2	0	0	2	1	2
CUT_GIM_0559	CUT_GIM_0559	CUT_GIM_0559	2	1	9	9	1	4	976	174	148	27	0	20	1	7	1	6	3	5	1	1	1	8	5	12	2	2	9	6	1	4	84	72	67	7	0	9	4	12	3	3	3	3	4	3	2	7	4
CUT_GIM_0560	CUT_GIM_0560	CUT_GIM_0560	25	10	22	19	18	14	374	62	68	83	0	45	2	0	8	30	21	24	1	5	2	14	20	39	27	17	22	13	18	12	32	26	31	20	0	21	7	0	21	15	19	15	4	13	4	12	16
CUT_GIM_0561	CUT_GIM_0561	CUT_GIM_0561	0	0	0	0	0	0	22	7	5	0	0	0	0	0	1	0	1	2	1	0	0	0	1	2	0	0	0	0	0	0	2	3	2	0	0	0	0	0	3	0	1	1	4	0	0	0	1
CUT_GIM_0562	CUT_GIM_0562	CUT_GIM_0562	1	7	11	11	4	2	264	94	88	27	1	17	0	3	1	4	3	6	3	2	2	6	2	10	1	12	11	7	4	2	23	39	40	7	14	8	0	5	3	2	3	4	12	5	4	5	2
CUT_GIM_0563	CUT_GIM_0563	CUT_GIM_0563	0	2	0	0	7	2	52	13	23	9	0	3	0	0	1	4	2	0	2	1	1	1	2	2	0	3	0	0	7	2	4	5	10	2	0	1	0	0	3	2	2	0	8	3	2	1	2
CUT_GIM_0564	CUT_GIM_0564	CUT_GIM_0564	12	4	15	26	22	18	480	80	80	38	3	50	3	10	5	23	8	13	2	4	3	7	10	26	13	7	15	18	22	16	41	33	36	9	41	23	11	17	13	11	7	8	8	10	7	6	8
CUT_GIM_0565	CUT_GIM_0565	CUT_GIM_0565	4	3	10	17	8	5	198	107	112	36	1	1	3	2	2	8	8	8	1	3	4	7	6	16	4	5	10	12	8	4	17	45	51	9	14	0	11	3	5	4	7	5	4	8	9	6	5
CUT_GIM_0566	CUT_GIM_0566	CUT_GIM_0566	12	4	18	27	22	18	516	105	98	38	3	51	3	10	5	25	8	13	4	6	6	14	22	38	13	7	18	18	22	16	44	44	45	9	41	24	11	17	13	12	7	8	15	15	13	12	18
CUT_GIM_0567	CUT_GIM_0567	CUT_GIM_0567	0	0	0	0	0	0	6	2	3	0	0	0	0	0	0	0	0	0	0	0	0	0	0	1	0	0	0	0	0	0	1	1	1	0	0	0	0	0	0	0	0	0	0	0	0	0	0
CUT_GIM_0568	CUT_GIM_0568	CUT_GIM_0568	10	4	18	10	2	12	690	116	81	35	0	20	4	7	3	13	7	6	3	2	5	4	10	13	11	7	18	7	2	11	59	48	37	9	0	9	14	12	8	6	6	4	12	5	11	4	8
CUT_GIM_0569	CUT_GIM_0569	CUT_GIM_0569	1	0	3	0	0	0	28	66	65	6	0	1	1	0	2	11	0	2	0	0	0	3	5	4	1	0	3	0	0	0	2	27	30	1	0	0	4	0	5	5	0	1	0	0	0	3	4
CUT_GIM_0570	CUT_GIM_0570	CUT_GIM_0570	0	0	0	1	0	0	4	0	2	1	0	0	0	0	0	0	0	0	0	0	0	0	1	0	0	0	0	1	0	0	0	0	1	0	0	0	0	0	0	0	0	0	0	0	0	0	1
CUT_GIM_0571	CUT_GIM_0571	CUT_GIM_0571	4	1	4	1	0	2	58	18	21	17	0	14	2	1	2	18	5	9	1	4	1	4	9	18	4	2	4	1	0	2	5	7	10	4	0	7	7	2	5	9	5	6	4	10	2	4	7
CUT_GIM_0572	CUT_GIM_0572	CUT_GIM_0572	2	2	2	4	3	2	94	10	16	24	0	4	0	1	0	4	1	4	2	2	0	1	3	5	2	3	2	3	3	2	8	4	7	6	0	2	0	2	0	2	1	3	8	5	0	1	2
CUT_GIM_0573	CUT_GIM_0573	CUT_GIM_0573	13	24	40	60	31	33	770	159	95	83	1	29	11	25	13	67	24	47	10	13	25	19	44	52	14	41	40	41	31	29	66	66	43	20	14	14	39	44	34	33	22	30	38	33	55	17	36
CUT_GIM_0574	CUT_GIM_0574	CUT_GIM_0574	0	0	0	1	0	0	2	1	2	0	0	0	0	0	0	1	0	0	0	0	0	1	0	0	0	0	0	1	0	0	0	0	1	0	0	0	0	0	0	0	0	0	0	0	0	1	0
CUT_GIM_0575	CUT_GIM_0575	CUT_GIM_0575	94	51	132	52	122	86	4468	1567	1183	756	11	1527	23	57	31	270	162	201	20	48	52	95	305	314	101	87	131	35	123	76	385	653	538	186	150	712	82	99	81	133	149	126	77	121	114	84	251
CUT_GIM_0576	CUT_GIM_0576	CUT_GIM_0576	1	0	2	1	1	2	14	3	5	4	0	0	0	0	2	1	3	3	0	0	1	2	2	2	1	0	2	1	1	2	1	1	2	1	0	0	0	0	5	0	3	2	0	0	2	2	2
CUT_GIM_0577	CUT_GIM_0577	CUT_GIM_0577	1	7	11	11	4	2	268	96	89	27	1	17	0	3	1	4	3	6	3	2	2	6	2	10	1	12	11	7	4	2	23	40	40	7	14	8	0	5	3	2	3	4	12	5	4	5	2
CUT_GIM_0578	CUT_GIM_0578	CUT_GIM_0578	8161	2798	7733	4026	5383	6907	32678	3547	3341	24522	136	7049	858	2798	1993	17906	13512	22975	742	1773	2739	8011	16640	25169	8753	4780	7692	2743	5445	6106	2817	1477	1519	6043	1857	3289	3043	4871	5218	8801	12468	14441	2849	4459	6024	7117	13720
CUT_GIM_0579	CUT_GIM_0579	CUT_GIM_0579	1	0	0	0	1	3	32	5	7	3	0	5	0	0	0	0	0	1	1	0	0	1	0	0	1	0	0	0	1	3	3	2	3	1	0	2	0	0	0	0	0	1	4	0	0	1	0
CUT_GIM_0580	CUT_GIM_0580	CUT_GIM_0580	19	5	15	6	6	7	236	31	27	110	0	72	2	6	6	26	15	29	2	0	2	21	21	28	20	9	15	4	6	6	20	13	12	27	0	34	7	10	16	13	14	18	8	0	4	19	17
CUT_GIM_0581	CUT_GIM_0581	CUT_GIM_0581	1	0	1	0	0	0	46	9	7	3	0	1	0	0	0	2	0	0	0	0	0	2	0	0	1	0	1	0	0	0	4	4	3	1	0	0	0	0	0	1	0	0	0	0	0	2	0
CUT_GIM_0582	CUT_GIM_0582	CUT_GIM_0582	30	10	14	18	30	26	238	51	63	113	0	38	4	10	7	41	25	31	4	13	3	17	34	45	32	17	14	12	30	23	21	21	29	28	0	18	14	17	18	20	23	19	15	33	7	15	28
CUT_GIM_0583	CUT_GIM_0583	CUT_GIM_0583	7	6	16	16	6	19	540	135	100	98	0	18	6	4	3	27	7	9	3	2	3	15	12	20	8	10	16	11	6	17	47	56	45	24	0	8	21	7	8	13	6	6	12	5	7	13	10
CUT_GIM_0584	CUT_GIM_0584	CUT_GIM_0584	0	3	0	2	2	1	68	48	83	2	0	2	0	0	0	3	3	1	2	0	1	2	1	4	0	5	0	1	2	1	6	20	38	0	0	1	0	0	0	1	3	1	8	0	2	2	1
CUT_GIM_0585	CUT_GIM_0585	CUT_GIM_0585	6	1	3	2	3	5	78	13	16	45	1	14	0	1	2	7	10	11	1	0	2	4	7	11	6	2	3	1	3	4	7	5	7	11	14	7	0	2	5	3	9	7	4	0	4	4	6
CUT_GIM_0586	CUT_GIM_0586	CUT_GIM_0586	2	3	1	4	0	0	176	74	82	5	1	5	0	2	0	5	1	1	0	2	0	2	1	8	2	5	1	3	0	0	15	31	37	1	14	2	0	3	0	2	1	1	0	5	0	2	1
CUT_GIM_0587	CUT_GIM_0587	CUT_GIM_0587	40	5	27	83	135	199	1794	111	85	176	1	24	24	50	64	235	127	181	26	56	75	152	99	175	43	9	27	57	137	176	155	46	39	43	14	11	85	87	168	115	117	114	100	141	165	135	82
CUT_GIM_0588	CUT_GIM_0588	CUT_GIM_0588	1	3	4	5	3	4	60	56	72	12	1	9	1	2	1	4	5	5	0	2	1	3	4	14	1	5	4	3	3	4	5	23	33	3	14	4	4	3	3	2	5	3	0	5	2	3	3
CUT_GIM_0589	CUT_GIM_0589	CUT_GIM_0589	0	0	0	0	0	0	12	8	13	0	0	0	0	0	0	1	1	0	0	0	0	0	0	2	0	0	0	0	0	0	1	3	6	0	0	0	0	0	0	0	1	0	0	0	0	0	0
CUT_GIM_0590	CUT_GIM_0590	CUT_GIM_0590	28	10	36	5	1	3	90	9	5	52	1	30	1	0	1	8	1	2	0	2	1	5	4	0	30	17	36	3	1	3	8	4	2	13	14	14	4	0	3	4	1	1	0	5	2	4	3
CUT_GIM_0591	CUT_GIM_0591	CUT_GIM_0591	32	5	21	18	27	33	324	50	52	135	0	53	7	18	9	80	47	69	6	12	18	36	57	81	34	9	21	12	27	29	28	21	24	33	0	25	25	31	24	39	43	43	23	30	40	32	47
CUT_GIM_0592	CUT_GIM_0592	CUT_GIM_0592	31	4	22	82	41	48	454	94	118	95	2	93	2	12	3	40	20	34	3	4	5	11	23	42	33	7	22	56	41	42	39	39	54	23	27	43	7	21	8	20	18	21	12	10	11	10	19
CUT_GIM_0593	CUT_GIM_0593	CUT_GIM_0593	16	8	17	10	14	9	408	64	56	84	2	69	6	4	7	27	10	30	1	2	3	21	24	30	17	14	17	7	14	8	35	27	25	21	27	32	21	7	18	13	9	19	4	5	7	19	20
CUT_GIM_0594	CUT_GIM_0594	CUT_GIM_0594	28	5	7	37	27	36	222	102	83	77	0	23	3	7	8	34	14	10	3	6	4	20	10	34	30	9	7	25	27	32	19	42	38	19	0	11	11	12	21	17	13	6	12	15	9	18	8
CUT_GIM_0595	CUT_GIM_0595	CUT_GIM_0595	0	0	0	1	0	1	6	1	7	1	0	0	0	0	0	1	0	0	0	0	0	0	2	0	0	0	0	1	0	1	1	0	3	0	0	0	0	0	0	0	0	0	0	0	0	0	2
CUT_GIM_0596	CUT_GIM_0596	CUT_GIM_0596	8	9	7	12	13	13	240	113	124	22	1	17	3	5	1	16	6	15	2	2	2	6	5	15	9	15	7	8	13	11	21	47	56	5	14	8	11	9	3	8	6	9	8	5	4	5	4
CUT_GIM_0597	CUT_GIM_0597	CUT_GIM_0597	0	1	4	1	2	2	164	41	36	7	0	3	0	1	1	5	1	1	0	0	1	7	3	5	0	2	4	1	2	2	14	17	16	2	0	1	0	2	3	2	1	1	0	0	2	6	2
CUT_GIM_0598	CUT_GIM_0598	CUT_GIM_0598	2	0	9	27	19	8	132	43	46	35	1	7	2	2	2	12	8	6	0	3	4	8	8	10	2	0	9	18	19	7	11	18	21	9	14	3	7	3	5	6	7	4	0	8	9	7	7
CUT_GIM_0599	CUT_GIM_0599	CUT_GIM_0599	0	0	0	0	0	0	4	5	3	1	0	0	0	0	0	0	0	0	0	0	0	0	0	0	0	0	0	0	0	0	0	2	1	0	0	0	0	0	0	0	0	0	0	0	0	0	0
CUT_GIM_0600	CUT_GIM_0600	CUT_GIM_0600	0	0	0	0	0	0	6	3	7	0	0	0	0	0	0	1	0	0	0	0	0	0	0	0	0	0	0	0	0	0	1	1	3	0	0	0	0	0	0	0	0	0	0	0	0	0	0
CUT_GIM_0601	CUT_GIM_0601	CUT_GIM_0601	28	15	29	19	36	34	478	75	79	202	1	47	1	21	14	56	42	60	6	7	11	50	52	76	30	26	29	13	36	30	41	31	36	50	14	22	4	37	37	28	39	38	23	18	24	44	43
CUT_GIM_0602	CUT_GIM_0602	CUT_GIM_0602	0	0	1	0	0	0	4	3	3	0	0	0	0	0	0	0	0	0	0	0	0	0	0	0	0	0	1	0	0	0	0	1	1	0	0	0	0	0	0	0	0	0	0	0	0	0	0
CUT_GIM_0603	CUT_GIM_0603	CUT_GIM_0603	1	1	1	7	2	1	48	33	40	5	0	3	0	2	1	3	2	0	1	0	0	1	2	8	1	2	1	5	2	1	4	14	18	1	0	1	0	3	3	1	2	0	4	0	0	1	2
CUT_GIM_0604	CUT_GIM_0604	CUT_GIM_0604	25	15	14	57	23	29	180	57	53	45	1	25	8	14	15	50	18	29	8	8	9	28	34	35	27	26	14	39	23	26	16	24	24	11	14	12	28	24	39	25	17	18	31	20	20	25	28
CUT_GIM_0605	CUT_GIM_0605	CUT_GIM_0605	11	2	1	7	17	18	90	14	11	46	0	8	2	3	3	6	8	14	1	4	3	4	15	18	12	3	1	5	17	16	8	6	5	11	0	4	7	5	8	3	7	9	4	10	7	4	12
CUT_GIM_0606	CUT_GIM_0606	CUT_GIM_0606	2489	889	1930	783	881	674	26962	5764	2891	6976	121	1954	186	539	341	2101	2192	3526	191	431	467	1398	2497	2975	2669	1519	1920	534	891	596	2324	2400	1314	1719	1652	912	660	938	893	1033	2023	2216	733	1084	1027	1242	2059
CUT_GIM_0607	CUT_GIM_0607	CUT_GIM_0607	0	0	0	0	0	0	10	4	7	0	0	0	0	1	0	0	0	0	0	0	0	1	0	0	0	0	0	0	0	0	1	2	3	0	0	0	0	2	0	0	0	0	0	0	0	1	0
CUT_GIM_0608	CUT_GIM_0608	CUT_GIM_0608	16	8	17	10	14	9	410	65	58	84	2	69	6	4	7	28	10	30	1	2	3	21	24	30	17	14	17	7	14	8	35	27	26	21	27	32	21	7	18	14	9	19	4	5	7	19	20
CUT_GIM_0609	CUT_GIM_0609	CUT_GIM_0609	28	10	7	67	36	48	258	113	94	90	0	26	7	9	9	37	18	16	3	7	6	22	13	34	30	17	7	46	36	42	22	47	43	22	0	12	25	16	24	18	17	10	12	18	13	20	11
CUT_GIM_0610	CUT_GIM_0610	CUT_GIM_0610	0	0	2	0	0	0	16	6	9	1	1	0	0	0	0	0	0	0	0	0	0	0	0	0	0	0	2	0	0	0	1	2	4	0	14	0	0	0	0	0	0	0	0	0	0	0	0
CUT_GIM_0611	CUT_GIM_0611	CUT_GIM_0611	18	13	20	37	25	30	408	82	74	179	4	24	4	11	4	47	35	52	5	12	8	24	37	41	19	22	20	25	25	27	35	34	34	44	55	11	14	19	10	23	32	33	19	30	18	21	31
CUT_GIM_0612	CUT_GIM_0612	CUT_GIM_0612	2	1	2	3	2	3	86	19	11	6	0	12	2	2	0	7	4	6	0	2	1	1	3	7	2	2	2	2	2	3	7	8	5	1	0	6	7	3	0	3	4	4	0	5	2	1	2
CUT_GIM_0613	CUT_GIM_0613	CUT_GIM_0613	0	0	0	0	0	0	6	4	7	0	0	0	0	0	0	1	0	0	0	0	0	0	0	0	0	0	0	0	0	0	1	2	3	0	0	0	0	0	0	0	0	0	0	0	0	0	0
CUT_GIM_0614	CUT_GIM_0614	CUT_GIM_0614	1	0	0	2	2	0	16	11	10	2	0	1	0	0	1	0	2	0	1	0	0	0	1	2	1	0	0	1	2	0	1	5	5	0	0	0	0	0	3	0	2	0	4	0	0	0	1
CUT_GIM_0615	CUT_GIM_0615	CUT_GIM_0615	15	2	6	10	10	19	106	28	37	79	0	9	5	8	5	36	16	30	2	2	9	28	21	21	16	3	6	7	10	17	9	12	17	19	0	4	18	14	13	18	15	19	8	5	20	25	17
CUT_GIM_0616	CUT_GIM_0616	CUT_GIM_0616	0	0	0	0	0	0	26	7	12	0	0	0	0	0	0	0	1	0	0	0	0	1	0	0	0	0	0	0	0	0	2	3	5	0	0	0	0	0	0	0	1	0	0	0	0	1	0
CUT_GIM_0617	CUT_GIM_0617	CUT_GIM_0617	0	2	1	0	0	0	12	6	6	2	0	0	0	0	0	2	0	2	1	1	0	1	0	0	0	3	1	0	0	0	1	2	3	0	0	0	0	0	0	1	0	1	4	3	0	1	0
CUT_GIM_0618	CUT_GIM_0618	CUT_GIM_0618	0	3	1	2	0	4	46	45	34	11	0	2	0	1	1	3	3	0	0	1	1	1	1	2	0	5	1	1	0	4	4	19	15	3	0	1	0	2	3	1	3	0	0	3	2	1	1
CUT_GIM_0619	CUT_GIM_0619	CUT_GIM_0619	8	9	7	12	13	13	236	110	118	22	1	17	3	5	1	16	6	15	2	2	2	5	5	15	9	15	7	8	13	11	20	46	54	5	14	8	11	9	3	8	6	9	8	5	4	4	4
CUT_GIM_0620	CUT_GIM_0620	CUT_GIM_0620	0	0	0	0	0	0	10	7	13	0	0	0	0	0	0	1	1	0	0	0	0	0	0	2	0	0	0	0	0	0	1	3	6	0	0	0	0	0	0	0	1	0	0	0	0	0	0
CUT_GIM_0621	CUT_GIM_0621	CUT_GIM_0621	11	6	4	28	20	23	140	36	39	66	1	25	4	10	5	41	11	19	1	12	7	13	14	20	12	10	4	19	20	20	12	15	18	16	14	12	14	17	13	20	10	12	4	30	15	12	12
CUT_GIM_0622	CUT_GIM_0622	CUT_GIM_0622	10	4	14	85	77	60	242	65	56	117	1	62	13	21	11	40	24	43	8	10	21	23	22	34	11	7	14	58	78	53	21	27	25	29	14	29	46	37	29	20	22	27	31	25	46	20	18
CUT_GIM_0623	CUT_GIM_0623	CUT_GIM_0623	33	16	28	43	15	20	1000	246	238	163	2	66	7	12	6	62	30	61	8	11	6	32	46	53	35	27	28	29	15	18	86	102	108	40	27	31	25	21	16	30	28	38	31	28	13	28	38
CUT_GIM_0624	CUT_GIM_0624	CUT_GIM_0624	0	0	1	0	0	0	12	12	17	0	0	0	0	0	0	1	0	0	0	0	0	0	0	0	0	0	1	0	0	0	1	5	8	0	0	0	0	0	0	0	0	0	0	0	0	0	0
CUT_GIM_0625	CUT_GIM_0625	CUT_GIM_0625	6	0	8	13	17	15	186	30	38	56	0	14	1	8	5	17	26	29	2	7	5	11	11	42	6	0	8	9	17	13	16	12	17	14	0	7	4	14	13	8	24	18	8	18	11	10	9
CUT_GIM_0626	CUT_GIM_0626	CUT_GIM_0626	72	5	25	11	30	28	116	25	20	250	0	35	1	11	15	96	61	98	0	9	12	28	71	144	77	9	25	7	30	25	10	10	9	62	0	16	4	19	39	47	56	62	0	23	26	25	59
CUT_GIM_0627	CUT_GIM_0627	CUT_GIM_0627	0	1	1	1	1	1	20	14	14	3	0	1	0	1	1	3	3	1	0	0	0	1	0	4	0	2	1	1	1	1	2	6	6	1	0	0	0	2	3	1	3	1	0	0	0	1	0
CUT_GIM_0628	CUT_GIM_0628	CUT_GIM_0628	43	10	30	27	41	57	564	50	58	130	0	35	8	25	19	123	50	79	7	22	20	46	68	127	46	17	30	18	41	50	49	21	26	32	0	16	28	44	50	60	46	50	27	55	44	41	56
CUT_GIM_0629	CUT_GIM_0629	CUT_GIM_0629	1	2	9	21	11	17	162	33	25	21	0	11	0	2	1	10	4	8	1	0	5	10	13	14	1	3	9	14	11	15	14	14	11	5	0	5	0	3	3	5	4	5	4	0	11	9	11
CUT_GIM_0630	CUT_GIM_0630	CUT_GIM_0630	144	55	103	49	28	33	1570	370	301	443	4	174	12	40	43	149	93	157	11	32	34	71	142	212	154	94	102	33	28	29	135	154	137	109	55	81	43	70	113	73	86	99	42	80	75	63	117
CUT_GIM_0631	CUT_GIM_0631	CUT_GIM_0631	3	2	6	12	8	4	186	84	87	25	0	14	1	3	2	15	5	5	0	2	1	4	3	8	3	3	6	8	8	4	16	35	40	6	0	7	4	5	5	7	5	3	0	5	2	4	2
CUT_GIM_0632	CUT_GIM_0632	CUT_GIM_0632	0	2	3	11	9	5	260	114	118	13	1	7	0	5	2	7	7	3	0	3	4	1	4	10	0	3	3	7	9	4	22	47	54	3	14	3	0	9	5	3	6	2	0	8	9	1	3
CUT_GIM_0633	CUT_GIM_0633	CUT_GIM_0633	0	3	3	2	0	1	30	31	28	9	0	3	1	1	2	5	2	5	0	0	0	2	2	2	0	5	3	1	0	1	3	13	13	2	0	1	4	2	5	2	2	3	0	0	0	2	2
CUT_GIM_0634	CUT_GIM_0634	CUT_GIM_0634	0	2	1	1	0	0	16	20	25	1	0	0	0	1	0	1	0	0	0	1	1	2	0	3	0	3	1	1	0	0	1	8	11	0	0	0	0	2	0	0	0	0	0	3	2	2	0
CUT_GIM_0635	CUT_GIM_0635	CUT_GIM_0635	0	0	0	1	1	0	6	4	7	0	0	2	0	0	0	1	0	0	0	0	0	0	0	0	0	0	0	1	1	0	1	2	3	0	0	1	0	0	0	0	0	0	0	0	0	0	0
CUT_GIM_0636	CUT_GIM_0636	CUT_GIM_0636	0	0	1	0	0	0	24	26	32	0	0	0	0	0	0	1	0	0	0	0	0	0	0	0	0	0	1	0	0	0	2	11	15	0	0	0	0	0	0	0	0	0	0	0	0	0	0
CUT_GIM_0637	CUT_GIM_0637	CUT_GIM_0637	2	0	9	28	19	8	132	43	48	35	1	7	2	2	2	12	8	6	0	3	4	8	8	10	2	0	9	19	19	7	11	18	22	9	14	3	7	3	5	6	7	4	0	8	9	7	7
CUT_GIM_0638	CUT_GIM_0638	CUT_GIM_0638	8	3	6	20	4	11	194	29	29	23	0	23	5	3	4	20	13	7	3	4	3	18	9	8	9	5	6	14	4	10	17	12	13	6	0	11	18	5	10	10	12	4	12	10	7	16	7
CUT_GIM_0639	CUT_GIM_0639	CUT_GIM_0639	1	0	0	0	0	0	16	11	9	0	0	1	0	1	0	1	0	0	0	0	0	0	0	1	1	0	0	0	0	0	1	5	4	0	0	0	0	2	0	0	0	0	0	0	0	0	0
CUT_GIM_0640	CUT_GIM_0640	CUT_GIM_0640	35	17	24	100	70	72	932	217	193	173	2	74	8	17	10	61	45	55	11	19	13	30	37	72	38	29	24	68	71	64	80	90	88	43	27	35	28	30	26	30	42	35	42	48	29	27	31
CUT_GIM_0641	CUT_GIM_0641	CUT_GIM_0641	0	0	3	1	0	0	12	14	10	1	0	2	0	0	1	2	1	1	1	0	0	0	0	1	0	0	3	1	0	0	1	6	5	0	0	1	0	0	3	1	1	1	4	0	0	0	0
CUT_GIM_0642	CUT_GIM_0642	CUT_GIM_0642	0	1	0	3	3	4	26	9	7	4	0	3	1	1	5	3	2	7	0	1	0	0	3	5	0	2	0	2	3	4	2	4	3	1	0	1	4	2	13	1	2	4	0	3	0	0	2
CUT_GIM_0643	CUT_GIM_0643	CUT_GIM_0643	1	0	1	0	0	1	18	14	12	0	0	0	0	0	0	0	0	0	0	0	0	0	0	0	1	0	1	0	0	1	2	6	5	0	0	0	0	0	0	0	0	0	0	0	0	0	0
CUT_GIM_0644	CUT_GIM_0644	CUT_GIM_0644	0	1	0	0	1	0	12	3	6	0	0	0	0	0	0	2	0	1	0	0	0	2	0	0	0	2	0	0	1	0	1	1	3	0	0	0	0	0	0	1	0	1	0	0	0	2	0
CUT_GIM_0645	CUT_GIM_0645	CUT_GIM_0645	0	0	0	4	1	1	36	12	10	1	0	1	0	2	1	1	0	4	0	1	0	1	1	0	0	0	0	3	1	1	3	5	5	0	0	0	0	3	3	0	0	3	0	3	0	1	1
CUT_GIM_0646	CUT_GIM_0646	CUT_GIM_0646	0	0	1	0	0	0	14	4	2	3	0	1	0	0	0	0	0	1	1	0	0	2	1	0	0	0	1	0	0	0	1	2	1	1	0	0	0	0	0	0	0	1	4	0	0	2	1
CUT_GIM_0647	CUT_GIM_0647	CUT_GIM_0647	182	31	83	83	167	208	538	124	130	388	5	187	10	48	27	248	144	264	9	35	46	74	260	324	195	53	83	57	169	184	46	52	59	96	68	87	35	84	71	122	133	166	35	88	101	66	214
CUT_GIM_0648	CUT_GIM_0648	CUT_GIM_0648	119	32	93	115	119	158	1068	277	253	385	0	146	16	58	34	280	177	291	19	46	71	114	230	391	128	55	93	78	120	140	92	115	115	95	0	68	57	101	89	138	163	183	73	116	156	101	190
CUT_GIM_0649	CUT_GIM_0649	CUT_GIM_0649	4	3	0	38	50	40	288	80	75	31	0	6	2	5	3	22	7	20	3	9	4	13	11	20	4	5	0	26	51	35	25	33	34	8	0	3	7	9	8	11	6	13	12	23	9	12	9
CUT_GIM_0650	CUT_GIM_0650	CUT_GIM_0650	16	3	14	11	11	12	256	37	42	66	2	32	2	6	3	20	10	14	3	1	3	12	10	26	17	5	14	7	11	11	22	15	19	16	27	15	7	10	8	10	9	9	12	3	7	11	8
CUT_GIM_0651	CUT_GIM_0651	CUT_GIM_0651	18	11	16	17	27	35	184	37	33	97	1	23	4	5	7	45	20	48	8	10	8	17	33	53	19	19	16	12	27	31	16	15	15	24	14	11	14	9	18	22	18	30	31	25	18	15	27
CUT_GIM_0652	CUT_GIM_0652	CUT_GIM_0652	10	2	12	30	53	43	396	68	60	145	2	56	19	42	24	85	57	97	12	25	39	38	58	112	11	3	12	20	54	38	34	28	27	36	27	26	67	73	63	42	53	61	46	63	86	34	48
CUT_GIM_0653	CUT_GIM_0653	CUT_GIM_0653	2	0	2	1	2	0	120	37	34	6	0	5	0	1	1	1	2	0	0	1	0	3	0	3	2	0	2	1	2	0	10	15	15	1	0	2	0	2	3	0	2	0	0	3	0	3	0
CUT_GIM_0654	CUT_GIM_0654	CUT_GIM_0654	1	1	0	4	1	1	50	23	27	2	0	1	0	0	1	2	1	3	0	0	0	0	4	1	1	2	0	3	1	1	4	10	12	0	0	0	0	0	3	1	1	2	0	0	0	0	3
CUT_GIM_0655	CUT_GIM_0655	CUT_GIM_0655	125	42	91	75	50	56	1716	376	361	310	8	183	19	28	24	88	68	120	17	22	20	43	104	127	134	72	91	51	51	50	148	157	164	76	109	85	67	49	63	43	63	75	65	55	44	38	86
CUT_GIM_0656	CUT_GIM_0656	CUT_GIM_0656	0	1	1	0	0	0	20	18	20	0	0	0	0	0	0	1	2	2	0	0	0	1	0	1	0	2	1	0	0	0	2	7	9	0	0	0	0	0	0	0	2	1	0	0	0	1	0
CUT_GIM_0657	CUT_GIM_0657	CUT_GIM_0657	6	1	1	5	5	6	288	49	59	28	0	8	0	5	3	17	6	13	0	1	5	5	2	7	6	2	1	3	5	5	25	20	27	7	0	4	0	9	8	8	6	8	0	3	11	4	2
CUT_GIM_0658	CUT_GIM_0658	CUT_GIM_0658	8	3	7	24	7	10	152	31	32	16	0	8	1	2	1	11	2	2	1	0	0	3	4	8	9	5	7	16	7	9	13	13	15	4	0	4	4	3	3	5	2	1	4	0	0	3	3
CUT_GIM_0659	CUT_GIM_0659	CUT_GIM_0659	8	1	1	5	2	0	88	18	15	13	0	12	0	2	1	11	2	4	1	1	1	1	0	2	9	2	1	3	2	0	8	7	7	3	0	6	0	3	3	5	2	3	4	3	2	1	0
CUT_GIM_0660	CUT_GIM_0660	CUT_GIM_0660	1	0	0	0	0	0	14	9	16	1	0	0	0	0	0	1	3	1	0	0	0	0	0	0	1	0	0	0	0	0	1	4	7	0	0	0	0	0	0	0	3	1	0	0	0	0	0
CUT_GIM_0661	CUT_GIM_0661	CUT_GIM_0661	1	1	6	3	1	2	88	24	29	5	2	1	2	0	0	5	1	3	1	0	2	3	4	3	1	2	6	2	1	2	8	10	13	1	27	0	7	0	0	2	1	2	4	0	4	3	3
CUT_GIM_0662	CUT_GIM_0662	CUT_GIM_0662	1	2	2	8	4	6	20	18	15	8	0	7	3	5	1	6	2	5	3	0	1	5	5	9	1	3	2	5	4	5	2	7	7	2	0	3	11	9	3	3	2	3	12	0	2	4	4
CUT_GIM_0663	CUT_GIM_0663	CUT_GIM_0663	0	0	0	1	1	1	12	7	6	1	0	1	1	0	0	2	1	0	3	0	0	0	1	1	0	0	0	1	1	1	1	3	3	0	0	0	4	0	0	1	1	0	12	0	0	0	1
CUT_GIM_0664	CUT_GIM_0664	CUT_GIM_0664	3	1	1	22	7	10	82	25	26	43	1	13	3	2	2	19	3	4	1	4	4	8	2	11	3	2	1	15	7	9	7	10	12	11	14	6	11	3	5	9	3	3	4	10	9	7	2
CUT_GIM_0665	CUT_GIM_0665	CUT_GIM_0665	0	1	2	0	0	0	66	18	28	1	0	0	0	1	0	2	1	0	0	0	0	1	0	3	0	2	2	0	0	0	6	7	13	0	0	0	0	2	0	1	1	0	0	0	0	1	0
CUT_GIM_0666	CUT_GIM_0666	CUT_GIM_0666	4	0	4	6	6	3	52	18	29	11	0	9	0	4	6	10	3	5	1	1	0	6	3	5	4	0	4	4	6	3	4	7	13	3	0	4	0	7	16	5	3	3	4	3	0	5	2
CUT_GIM_0667	CUT_GIM_0667	CUT_GIM_0667	40	13	44	45	92	151	1266	352	337	228	3	33	12	20	19	93	57	68	2	20	33	29	45	88	43	22	44	31	93	133	109	147	153	56	41	15	43	35	50	46	53	43	8	50	73	26	37
CUT_GIM_0668	CUT_GIM_0668	CUT_GIM_0668	3	0	3	10	10	10	182	47	26	19	1	13	2	2	4	6	3	13	0	2	2	0	4	17	3	0	3	7	10	9	16	20	12	5	14	6	7	3	10	3	3	8	0	5	4	0	3
CUT_GIM_0669	CUT_GIM_0669	CUT_GIM_0669	10	9	10	12	8	17	296	109	120	144	1	31	4	8	7	23	16	20	1	6	4	9	19	21	11	15	10	8	8	15	26	45	55	35	14	14	14	14	18	11	15	13	4	15	9	8	16
CUT_GIM_0670	CUT_GIM_0670	CUT_GIM_0670	41	29	53	94	82	67	1266	287	246	143	2	133	9	14	13	76	29	45	11	13	12	28	39	69	44	50	53	64	83	59	109	120	112	35	27	62	32	24	34	37	27	28	42	33	26	25	32
CUT_GIM_0671	CUT_GIM_0671	CUT_GIM_0671	0	0	1	1	0	0	36	5	11	4	0	1	0	0	1	3	0	1	0	0	0	1	1	0	0	0	1	1	0	0	3	2	5	1	0	0	0	0	3	1	0	1	0	0	0	1	1
CUT_GIM_0672	CUT_GIM_0672	CUT_GIM_0672	1	1	2	4	5	3	122	27	33	10	0	7	0	1	0	6	0	3	0	0	2	1	4	1	1	2	2	3	5	3	11	11	15	2	0	3	0	2	0	3	0	2	0	0	4	1	3
CUT_GIM_0673	CUT_GIM_0673	CUT_GIM_0673	31	8	29	37	32	51	626	24	32	76	0	33	8	11	7	47	19	31	3	8	12	20	40	38	33	14	29	25	32	45	54	10	15	19	0	15	28	19	18	23	18	19	12	20	26	18	33
CUT_GIM_0674	CUT_GIM_0674	CUT_GIM_0674	1	0	1	1	1	1	18	4	7	0	0	1	0	0	0	1	0	0	0	0	1	0	0	0	1	0	1	1	1	1	2	2	3	0	0	0	0	0	0	0	0	0	0	0	2	0	0
CUT_GIM_0675	CUT_GIM_0675	CUT_GIM_0675	2	1	1	2	1	0	34	16	14	16	0	3	0	2	1	3	1	6	0	0	2	3	0	6	2	2	1	1	1	0	3	7	6	4	0	1	0	3	3	1	1	4	0	0	4	3	0
CUT_GIM_0676	CUT_GIM_0676	CUT_GIM_0676	1	1	0	4	1	1	50	23	26	2	0	1	0	0	1	2	1	3	0	0	0	0	4	1	1	2	0	3	1	1	4	10	12	0	0	0	0	0	3	1	1	2	0	0	0	0	3
CUT_GIM_0677	CUT_GIM_0677	CUT_GIM_0677	0	0	1	0	0	0	18	8	8	2	0	0	0	0	1	1	1	0	2	0	0	1	0	0	0	0	1	0	0	0	2	3	4	0	0	0	0	0	3	0	1	0	8	0	0	1	0
CUT_GIM_0678	CUT_GIM_0678	CUT_GIM_0678	12	6	7	15	11	10	170	9	17	116	1	64	3	11	5	29	24	32	4	3	7	22	21	48	13	10	7	10	11	9	15	4	8	29	14	30	11	19	13	14	22	20	15	8	15	20	17
CUT_GIM_0679	CUT_GIM_0679	CUT_GIM_0679	25	9	11	13	27	35	264	41	42	98	0	48	0	11	2	41	22	27	4	3	9	18	16	39	27	15	11	9	27	31	23	17	19	24	0	22	0	19	5	20	20	17	15	8	20	16	13
CUT_GIM_0680	CUT_GIM_0680	CUT_GIM_0680	0	0	1	1	0	1	4	4	3	0	0	0	0	0	1	2	0	0	0	0	1	1	0	0	0	0	1	1	0	1	0	2	1	0	0	0	0	0	3	1	0	0	0	0	2	1	0
CUT_GIM_0681	CUT_GIM_0681	CUT_GIM_0681	30	20	30	59	21	24	184	51	43	70	1	97	12	26	12	74	25	62	17	16	9	38	40	74	32	34	30	40	21	21	16	21	20	17	14	45	43	45	31	36	23	39	65	40	20	34	33
CUT_GIM_0682	CUT_GIM_0682	CUT_GIM_0682	20	2	17	5	9	12	124	31	22	85	0	24	2	5	1	39	19	37	0	5	7	16	30	33	21	3	17	3	9	11	11	13	10	21	0	11	7	9	3	19	18	23	0	13	15	14	25
CUT_GIM_0683	CUT_GIM_0683	CUT_GIM_0683	6	2	3	12	19	6	110	60	84	91	3	18	6	15	9	66	18	50	9	11	8	30	27	41	6	3	3	8	19	5	9	25	38	22	41	8	21	26	24	32	17	31	35	28	18	27	22
CUT_GIM_0684	CUT_GIM_0684	CUT_GIM_0684	25	13	24	19	23	41	410	80	94	161	2	38	4	21	10	51	28	40	6	9	12	26	36	51	27	22	24	13	23	36	35	33	43	40	27	18	14	37	26	25	26	25	23	23	26	23	30
CUT_GIM_0685	CUT_GIM_0685	CUT_GIM_0685	0	2	2	2	2	1	62	26	28	4	0	2	0	1	1	2	5	4	0	1	0	1	1	5	0	3	2	1	2	1	5	11	13	1	0	1	0	2	3	1	5	3	0	3	0	1	1
CUT_GIM_0686	CUT_GIM_0686	CUT_GIM_0686	8	5	4	5	3	10	116	29	36	47	0	6	0	3	2	8	4	8	0	1	2	6	9	12	9	9	4	3	3	9	10	12	16	12	0	3	0	5	5	4	4	5	0	3	4	5	7
CUT_GIM_0687	CUT_GIM_0687	CUT_GIM_0687	0	1	6	5	4	2	96	52	57	2	0	1	0	0	0	11	2	6	0	1	1	4	3	3	0	2	6	3	4	2	8	22	26	0	0	0	0	0	0	5	2	4	0	3	2	4	2
CUT_GIM_0688	CUT_GIM_0688	CUT_GIM_0688	5	2	7	3	3	4	70	21	10	41	0	2	0	5	1	13	10	12	2	0	0	5	7	18	5	3	7	2	3	4	6	9	5	10	0	1	0	9	3	6	9	8	8	0	0	4	6
CUT_GIM_0689	CUT_GIM_0689	CUT_GIM_0689	12	2	10	15	21	16	234	53	48	45	0	14	5	10	4	19	13	11	2	5	8	10	12	26	13	3	10	10	21	14	20	22	22	11	0	7	18	17	10	9	12	7	8	13	18	9	10
CUT_GIM_0690	CUT_GIM_0690	CUT_GIM_0690	1	0	0	0	0	0	10	4	5	1	0	1	0	0	0	0	0	0	0	0	0	1	0	2	1	0	0	0	0	0	1	2	2	0	0	0	0	0	0	0	0	0	0	0	0	1	0
CUT_GIM_0691	CUT_GIM_0691	CUT_GIM_0691	2	0	0	0	1	1	24	8	6	5	0	1	0	2	2	3	3	2	0	1	1	2	4	0	2	0	0	0	1	1	2	3	3	1	0	0	0	3	5	1	3	1	0	3	2	2	3
CUT_GIM_0692	CUT_GIM_0692	CUT_GIM_0692	1	1	2	2	1	1	34	12	17	4	1	13	0	0	0	2	1	2	0	1	1	0	0	1	1	2	2	1	1	1	3	5	8	1	14	6	0	0	0	1	1	1	0	3	2	0	0
CUT_GIM_0693	CUT_GIM_0693	CUT_GIM_0693	63	38	86	55	72	77	1338	232	202	397	0	88	17	59	32	189	154	256	14	42	41	113	218	292	68	65	86	37	73	68	115	97	92	98	0	41	60	103	84	93	142	161	54	106	90	100	180
CUT_GIM_0694	CUT_GIM_0694	CUT_GIM_0694	8	1	3	4	2	12	82	19	17	52	0	10	2	4	3	17	9	16	4	1	2	10	9	9	9	2	3	3	2	11	7	8	8	13	0	5	7	7	8	8	8	10	15	3	4	9	7
CUT_GIM_0695	CUT_GIM_0695	CUT_GIM_0695	5	1	2	14	7	12	192	51	48	25	1	26	1	4	1	11	4	12	3	3	3	9	3	15	5	2	2	10	7	11	17	21	22	6	14	12	4	7	3	5	4	8	12	8	7	8	2
CUT_GIM_0696	CUT_GIM_0696	CUT_GIM_0696	1	2	0	0	0	1	72	25	32	20	0	0	0	1	0	3	2	0	0	0	0	0	0	2	1	3	0	0	0	1	6	10	15	5	0	0	0	2	0	1	2	0	0	0	0	0	0
CUT_GIM_0697	CUT_GIM_0697	CUT_GIM_0697	5	2	4	6	2	2	34	5	8	8	0	1	0	0	2	2	3	0	0	0	0	0	1	0	5	3	4	4	2	2	3	2	4	2	0	0	0	0	5	1	3	0	0	0	0	0	1
CUT_GIM_0698	CUT_GIM_0698	CUT_GIM_0698	0	1	6	3	3	2	84	56	62	3	0	1	0	0	0	11	1	6	0	1	1	4	3	2	0	2	6	2	3	2	7	23	28	1	0	0	0	0	0	5	1	4	0	3	2	4	2
CUT_GIM_0699	CUT_GIM_0699	CUT_GIM_0699	7	2	3	20	22	10	158	75	94	104	4	22	7	19	11	76	28	58	13	12	9	40	29	50	8	3	3	14	22	9	14	31	43	26	55	10	25	33	29	37	26	36	50	30	20	36	24
CUT_GIM_0700	CUT_GIM_0700	CUT_GIM_0700	2	2	3	7	1	7	224	42	43	8	0	5	0	1	1	9	1	2	3	1	0	2	1	12	2	3	3	5	1	6	19	17	20	2	0	2	0	2	3	4	1	1	12	3	0	2	1
CUT_GIM_0701	CUT_GIM_0701	CUT_GIM_0701	0	1	5	2	2	1	80	52	57	3	0	1	0	0	0	11	1	4	0	0	1	4	3	2	0	2	5	1	2	1	7	22	26	1	0	0	0	0	0	5	1	3	0	0	2	4	2
CUT_GIM_0702	CUT_GIM_0702	CUT_GIM_0702	1	0	2	2	2	1	32	17	20	2	0	2	1	0	1	3	0	1	1	0	0	2	2	2	1	0	2	1	2	1	3	7	9	0	0	1	4	0	3	1	0	1	4	0	0	2	2
CUT_GIM_0703	CUT_GIM_0703	CUT_GIM_0703	0	1	0	0	0	2	42	32	45	3	0	0	0	0	2	3	1	0	0	0	1	0	0	2	0	2	0	0	0	2	4	13	20	1	0	0	0	0	5	1	1	0	0	0	2	0	0
CUT_GIM_0704	CUT_GIM_0704	CUT_GIM_0704	2	0	3	3	8	8	44	8	5	11	0	15	2	3	1	10	8	4	1	2	0	2	2	7	2	0	3	2	8	7	4	3	2	3	0	7	7	5	3	5	7	3	4	5	0	2	2
CUT_GIM_0705	CUT_GIM_0705	CUT_GIM_0705	2	2	2	0	0	0	48	22	20	3	0	0	0	0	0	1	1	0	1	0	0	1	0	0	2	3	2	0	0	0	4	9	9	1	0	0	0	0	0	0	1	0	4	0	0	1	0
CUT_GIM_0706	CUT_GIM_0706	CUT_GIM_0706	882	236	779	392	751	886	8100	933	899	2256	14	522	59	268	170	1158	977	1593	46	184	244	447	1153	1674	946	403	775	267	760	783	698	389	409	556	191	244	209	467	445	569	902	1001	177	463	537	397	951
CUT_GIM_0707	CUT_GIM_0707	CUT_GIM_0707	1	1	2	0	2	0	76	22	23	6	0	11	1	4	2	0	0	4	1	1	0	3	1	2	1	2	2	0	2	0	7	9	10	1	0	5	4	7	5	0	0	3	4	3	0	3	1
CUT_GIM_0708	CUT_GIM_0708	CUT_GIM_0708	0	1	2	4	0	1	70	7	13	1	0	2	1	2	1	6	1	1	2	1	0	0	0	1	0	2	2	3	0	1	6	3	6	0	0	1	4	3	3	3	1	1	8	3	0	0	0
CUT_GIM_0709	CUT_GIM_0709	CUT_GIM_0709	157	96	155	316	331	265	1498	595	382	565	8	259	40	81	78	191	174	234	29	93	75	99	180	251	168	164	154	215	335	234	129	248	174	139	109	121	142	141	204	94	161	147	111	234	165	88	148
CUT_GIM_0710	CUT_GIM_0710	CUT_GIM_0710	0	0	1	0	1	1	30	11	19	2	0	0	0	0	0	2	2	0	1	0	0	0	1	2	0	0	1	0	1	1	3	5	9	0	0	0	0	0	0	1	2	0	4	0	0	0	1
CUT_GIM_0711	CUT_GIM_0711	CUT_GIM_0711	0	1	0	1	1	0	30	8	4	4	0	6	0	2	1	3	0	1	0	0	0	3	1	1	0	2	0	1	1	0	3	3	2	1	0	3	0	3	3	1	0	1	0	0	0	3	1
CUT_GIM_0712	CUT_GIM_0712	CUT_GIM_0712	0	0	0	0	0	1	14	11	22	0	0	0	0	0	0	1	0	0	0	0	0	0	0	0	0	0	0	0	0	1	1	5	10	0	0	0	0	0	0	0	0	0	0	0	0	0	0
CUT_GIM_0713	CUT_GIM_0713	CUT_GIM_0713	0	0	0	0	0	1	8	10	19	0	0	0	0	0	0	1	0	0	0	0	0	0	0	0	0	0	0	0	0	1	1	4	9	0	0	0	0	0	0	0	0	0	0	0	0	0	0
CUT_GIM_0714	CUT_GIM_0714	CUT_GIM_0714	1	0	4	5	3	5	108	60	67	14	0	10	1	2	1	4	2	5	0	2	1	5	3	7	1	0	4	3	3	4	9	25	30	3	0	5	4	3	3	2	2	3	0	5	2	4	2
CUT_GIM_0715	CUT_GIM_0715	CUT_GIM_0715	0	0	0	0	0	0	8	3	5	0	0	0	0	0	0	0	0	0	0	0	0	2	0	0	0	0	0	0	0	0	1	1	2	0	0	0	0	0	0	0	0	0	0	0	0	2	0
CUT_GIM_0716	CUT_GIM_0716	CUT_GIM_0716	2	0	3	2	3	7	64	23	15	12	0	4	1	2	0	10	2	7	0	2	2	3	10	6	2	0	3	1	3	6	6	10	7	3	0	2	4	3	0	5	2	4	0	5	4	3	8
CUT_GIM_0717	CUT_GIM_0717	CUT_GIM_0717	2	0	1	11	8	8	240	48	43	10	0	16	0	1	2	8	4	3	2	2	2	3	6	9	2	0	1	7	8	7	21	20	20	2	0	7	0	2	5	4	4	2	8	5	4	3	5
CUT_GIM_0718	CUT_GIM_0718	CUT_GIM_0718	17	4	9	6	5	11	144	79	96	29	0	6	0	6	2	23	7	13	0	1	4	11	6	15	18	7	9	4	5	10	12	33	44	7	0	3	0	10	5	11	6	8	0	3	9	10	5
CUT_GIM_0719	CUT_GIM_0719	CUT_GIM_0719	16	14	23	17	24	16	828	131	115	117	0	51	1	10	7	38	24	28	5	5	14	19	37	49	17	24	23	12	24	14	71	55	52	29	0	24	4	17	18	19	22	18	19	13	31	17	31
CUT_GIM_0720	CUT_GIM_0720	CUT_GIM_0720	55	7	23	4	12	21	160	39	31	206	1	120	3	18	8	63	29	40	2	6	7	32	51	49	59	12	23	3	12	19	14	16	14	51	14	56	11	31	21	31	27	25	8	15	15	28	42
CUT_GIM_0721	CUT_GIM_0721	CUT_GIM_0721	3	2	1	9	5	2	88	18	13	16	0	17	4	5	1	6	2	6	0	2	0	0	4	8	3	3	1	6	5	2	8	7	6	4	0	8	14	9	3	3	2	4	0	5	0	0	3
CUT_GIM_0722	CUT_GIM_0722	CUT_GIM_0722	0	0	0	0	0	0	2	2	1	0	0	0	0	0	0	0	0	0	0	0	0	0	0	0	0	0	0	0	0	0	0	1	0	0	0	0	0	0	0	0	0	0	0	0	0	0	0
CUT_GIM_0723	CUT_GIM_0723	CUT_GIM_0723	1	1	1	2	4	3	54	11	7	21	0	7	0	3	3	5	3	4	0	3	2	2	6	5	1	2	1	1	4	3	5	5	3	5	0	3	0	5	8	2	3	3	0	8	4	2	5
CUT_GIM_0724	CUT_GIM_0724	CUT_GIM_0724	0	1	1	0	0	0	24	11	7	1	0	1	0	0	0	0	0	0	0	0	0	0	0	1	0	2	1	0	0	0	2	5	3	0	0	0	0	0	0	0	0	0	0	0	0	0	0
CUT_GIM_0725	CUT_GIM_0725	CUT_GIM_0725	0	1	0	0	0	0	18	13	18	0	0	0	0	0	0	0	0	1	0	0	0	2	1	2	0	2	0	0	0	0	2	5	8	0	0	0	0	0	0	0	0	1	0	0	0	2	1
CUT_GIM_0726	CUT_GIM_0726	CUT_GIM_0726	1	0	1	9	7	8	144	31	28	7	0	12	0	0	2	6	3	3	2	2	2	3	6	7	1	0	1	6	7	7	12	13	13	2	0	6	0	0	5	3	3	2	8	5	4	3	5
CUT_GIM_0727	CUT_GIM_0727	CUT_GIM_0727	11	1	6	7	2	0	368	59	80	57	1	15	0	1	3	7	4	4	0	0	0	7	6	7	12	2	6	5	2	0	32	25	36	14	14	7	0	2	8	3	4	3	0	0	0	6	5
CUT_GIM_0728	CUT_GIM_0728	CUT_GIM_0728	8	6	11	11	4	10	488	128	116	36	0	25	2	4	3	10	4	10	1	3	3	5	14	9	9	10	11	7	4	9	42	53	53	9	0	12	7	7	8	5	4	6	4	8	7	4	12
CUT_GIM_0729	CUT_GIM_0729	CUT_GIM_0729	16	13	16	64	53	35	758	128	115	101	2	81	10	10	7	57	15	26	2	9	16	22	37	53	17	22	16	44	54	31	65	53	52	25	27	38	35	17	18	28	14	16	8	23	35	20	31
CUT_GIM_0730	CUT_GIM_0730	CUT_GIM_0730	1	2	2	0	4	4	106	43	39	8	0	4	0	2	0	10	1	5	1	1	2	3	5	12	1	3	2	0	4	4	9	18	18	2	0	2	0	3	0	5	1	3	4	3	4	3	4
CUT_GIM_0731	CUT_GIM_0731	CUT_GIM_0731	2	0	0	2	0	1	46	9	4	2	0	1	0	1	1	5	0	1	0	0	2	3	2	1	2	0	0	1	0	1	4	4	2	0	0	0	0	2	3	2	0	1	0	0	4	3	2
CUT_GIM_0732	CUT_GIM_0732	CUT_GIM_0732	2	0	1	11	1	5	82	32	29	19	0	6	2	9	5	14	7	12	3	5	2	5	6	14	2	0	1	7	1	4	7	13	13	5	0	3	7	16	13	7	6	8	12	13	4	4	5
CUT_GIM_0733	CUT_GIM_0733	CUT_GIM_0733	0	0	0	0	1	0	2	4	1	0	0	0	0	0	0	0	0	0	0	0	0	0	0	0	0	0	0	0	1	0	0	2	0	0	0	0	0	0	0	0	0	0	0	0	0	0	0
CUT_GIM_0734	CUT_GIM_0734	CUT_GIM_0734	0	0	0	1	0	0	4	4	1	0	0	0	0	0	0	1	1	2	0	0	0	0	0	0	0	0	0	1	0	0	0	2	0	0	0	0	0	0	0	0	1	1	0	0	0	0	0
CUT_GIM_0735	CUT_GIM_0735	CUT_GIM_0735	7	2	5	3	3	3	36	5	3	34	0	12	2	0	0	7	4	8	1	0	0	6	4	5	8	3	5	2	3	3	3	2	1	8	0	6	7	0	0	3	4	5	4	0	0	5	3
CUT_GIM_0736	CUT_GIM_0736	CUT_GIM_0736	0	1	1	0	2	0	52	8	8	2	0	1	0	1	0	1	0	0	0	0	0	1	2	1	0	2	1	0	2	0	4	3	4	0	0	0	0	2	0	0	0	0	0	0	0	1	2
CUT_GIM_0737	CUT_GIM_0737	CUT_GIM_0737	8	4	6	7	4	7	400	106	92	21	0	18	0	1	2	4	2	5	0	2	2	3	11	3	9	7	6	5	4	6	34	44	42	5	0	8	0	2	5	2	2	3	0	5	4	3	9
CUT_GIM_0738	CUT_GIM_0738	CUT_GIM_0738	0	0	0	0	0	0	0	1	1	0	0	0	0	0	0	0	0	0	0	0	0	0	0	0	0	0	0	0	0	0	0	0	0	0	0	0	0	0	0	0	0	0	0	0	0	0	0
CUT_GIM_0739	CUT_GIM_0739	CUT_GIM_0739	0	1	0	3	2	0	48	12	14	8	0	4	1	2	1	7	0	2	1	0	0	5	2	3	0	2	0	2	2	0	4	5	6	2	0	2	4	3	3	3	0	1	4	0	0	4	2
CUT_GIM_0740	CUT_GIM_0740	CUT_GIM_0740	4	1	4	7	8	8	130	25	26	41	2	20	3	2	0	13	9	8	2	1	3	11	4	11	4	2	4	5	8	7	11	10	12	10	27	9	11	3	0	6	8	5	8	3	7	10	3
CUT_GIM_0741	CUT_GIM_0741	CUT_GIM_0741	0	1	0	0	1	1	12	9	15	1	0	1	0	1	1	0	0	0	0	1	0	0	1	1	0	2	0	0	1	1	1	4	7	0	0	0	0	2	3	0	0	0	0	3	0	0	1
CUT_GIM_0742	CUT_GIM_0742	CUT_GIM_0742	0	0	7	2	1	1	34	75	43	2	0	1	1	0	0	3	2	0	0	0	1	1	2	1	0	0	7	1	1	1	3	31	20	0	0	0	4	0	0	1	2	0	0	0	2	1	2
CUT_GIM_0743	CUT_GIM_0743	CUT_GIM_0743	0	0	0	0	0	0	28	8	8	0	0	0	0	0	0	0	0	0	0	0	0	1	1	1	0	0	0	0	0	0	2	3	4	0	0	0	0	0	0	0	0	0	0	0	0	1	1
CUT_GIM_0744	CUT_GIM_0744	CUT_GIM_0744	0	0	0	0	0	0	8	3	2	3	0	1	0	0	0	0	1	0	0	0	0	0	0	0	0	0	0	0	0	0	1	1	1	1	0	0	0	0	0	0	1	0	0	0	0	0	0
CUT_GIM_0745	CUT_GIM_0745	CUT_GIM_0745	16	2	6	6	18	10	108	15	17	46	1	7	1	4	6	15	8	26	1	4	7	8	16	25	17	3	6	4	18	9	9	6	8	11	14	3	4	7	16	7	7	16	4	10	15	7	13
CUT_GIM_0746	CUT_GIM_0746	CUT_GIM_0746	0	2	1	5	1	3	98	15	8	7	0	3	1	2	0	1	0	3	0	0	0	2	1	4	0	3	1	3	1	3	8	6	4	2	0	1	4	3	0	0	0	2	0	0	0	2	1
CUT_GIM_0747	CUT_GIM_0747	CUT_GIM_0747	4	3	3	2	2	1	122	26	38	18	0	5	0	0	0	3	2	3	0	0	0	0	3	2	4	5	3	1	2	1	11	11	17	4	0	2	0	0	0	1	2	2	0	0	0	0	2
CUT_GIM_0748	CUT_GIM_0748	CUT_GIM_0748	371	159	334	342	431	444	2968	1084	1002	1194	25	419	61	158	130	798	615	1122	46	122	158	349	829	957	398	272	332	233	436	393	256	451	455	294	341	195	216	275	340	392	567	705	177	307	348	310	684
CUT_GIM_0749	CUT_GIM_0749	CUT_GIM_0749	54	17	39	13	23	44	720	139	155	192	1	118	9	16	11	69	50	83	4	15	7	41	63	79	58	29	39	9	23	39	62	58	70	47	14	55	32	28	29	34	46	52	15	38	15	36	52
CUT_GIM_0750	CUT_GIM_0750	CUT_GIM_0750	116	16	52	49	54	68	788	129	125	426	3	132	8	31	24	171	113	162	7	22	36	82	108	186	124	27	52	33	55	60	68	54	57	105	41	62	28	54	63	84	104	102	27	55	79	73	89
CUT_GIM_0751	CUT_GIM_0751	CUT_GIM_0751	0	0	0	0	1	0	2	6	7	1	1	0	0	1	0	4	2	2	1	0	1	2	0	2	0	0	0	0	1	0	0	2	3	0	14	0	0	2	0	2	2	1	4	0	2	2	0
CUT_GIM_0752	CUT_GIM_0752	CUT_GIM_0752	21	11	27	34	16	22	406	101	126	87	0	43	11	10	4	45	26	38	2	14	8	19	23	42	23	19	27	23	16	19	35	42	57	21	0	20	39	17	10	22	24	24	8	35	18	17	19
CUT_GIM_0753	CUT_GIM_0753	CUT_GIM_0753	2	1	1	3	3	5	30	6	9	12	0	0	0	1	0	5	1	5	1	1	1	2	4	2	2	2	1	2	3	4	3	2	4	3	0	0	0	2	0	2	1	3	4	3	2	2	3
CUT_GIM_0754	CUT_GIM_0754	CUT_GIM_0754	7	4	5	4	2	2	142	44	66	21	1	5	0	3	0	10	4	3	1	1	0	4	4	12	8	7	5	3	2	2	12	18	30	5	14	2	0	5	0	5	4	2	4	3	0	4	3
CUT_GIM_0755	CUT_GIM_0755	CUT_GIM_0755	18	9	6	19	10	19	538	133	101	131	0	15	4	6	8	16	19	21	9	5	7	12	13	21	19	15	6	13	10	17	46	55	46	32	0	7	14	10	21	8	18	13	35	13	15	11	11
CUT_GIM_0756	CUT_GIM_0756	CUT_GIM_0756	0	0	0	0	0	0	6	3	6	2	0	0	0	0	0	0	0	0	0	0	0	0	0	0	0	0	0	0	0	0	1	1	3	0	0	0	0	0	0	0	0	0	0	0	0	0	0
CUT_GIM_0757	CUT_GIM_0757	CUT_GIM_0757	4	3	1	3	0	0	84	14	14	5	0	0	0	2	1	0	0	1	0	0	0	1	0	3	4	5	1	2	0	0	7	6	6	1	0	0	0	3	3	0	0	1	0	0	0	1	0
CUT_GIM_0758	CUT_GIM_0758	CUT_GIM_0758	0	1	3	2	1	1	66	21	22	3	0	4	1	1	1	5	1	3	1	0	1	1	1	3	0	2	3	1	1	1	6	9	10	1	0	2	4	2	3	2	1	2	4	0	2	1	1
CUT_GIM_0759	CUT_GIM_0759	CUT_GIM_0759	1	0	0	2	0	2	48	16	5	6	0	1	0	1	1	4	2	1	1	0	0	2	3	2	1	0	0	1	0	2	4	7	2	1	0	0	0	2	3	2	2	1	4	0	0	2	2
CUT_GIM_0760	CUT_GIM_0760	CUT_GIM_0760	3	9	3	6	1	1	156	86	106	9	1	4	2	2	1	12	6	7	2	6	3	4	5	13	3	15	3	4	1	1	13	36	48	2	14	2	7	3	3	6	6	4	8	15	7	4	4
CUT_GIM_0761	CUT_GIM_0761	CUT_GIM_0761	15	7	23	94	43	43	698	178	134	95	2	47	16	14	9	58	16	35	12	15	15	26	17	32	16	12	23	64	43	38	60	74	61	23	27	22	57	24	24	29	15	22	46	38	33	23	14
CUT_GIM_0762	CUT_GIM_0762	CUT_GIM_0762	0	1	1	1	0	0	28	22	24	3	0	1	0	0	0	0	0	0	0	2	0	0	0	0	0	2	1	1	0	0	2	9	11	1	0	0	0	0	0	0	0	0	0	5	0	0	0
CUT_GIM_0763	CUT_GIM_0763	CUT_GIM_0763	1	2	1	13	8	10	62	18	22	13	0	3	1	2	1	4	2	5	0	1	3	8	9	7	1	3	1	9	8	9	5	7	10	3	0	1	4	3	3	2	2	3	0	3	7	7	7
CUT_GIM_0764	CUT_GIM_0764	CUT_GIM_0764	4	2	0	4	0	2	146	16	12	58	0	13	3	7	4	23	8	15	1	3	4	10	6	22	4	3	0	3	0	2	13	7	5	14	0	6	11	12	10	11	7	9	4	8	9	9	5
CUT_GIM_0765	CUT_GIM_0765	CUT_GIM_0765	1	1	4	2	0	0	46	15	15	13	0	1	1	3	1	3	1	0	1	1	0	3	2	6	1	2	4	1	0	0	4	6	7	3	0	0	4	5	3	1	1	0	4	3	0	3	2
CUT_GIM_0766	CUT_GIM_0766	CUT_GIM_0766	4	1	6	6	6	3	88	36	62	10	0	1	0	0	3	6	5	0	0	1	0	2	2	2	4	2	6	4	6	3	8	15	28	2	0	0	0	0	8	3	5	0	0	3	0	2	2
CUT_GIM_0767	CUT_GIM_0767	CUT_GIM_0767	1349	552	1507	1010	1022	1301	9652	1395	1016	4763	17	1026	211	699	471	3347	3046	5567	184	403	549	1959	3691	4997	1447	943	1499	688	1034	1150	832	581	462	1174	232	479	748	1217	1233	1645	2811	3499	707	1013	1208	1740	3043
CUT_GIM_0768	CUT_GIM_0768	CUT_GIM_0768	0	2	1	1	0	4	128	40	35	12	1	0	0	1	1	4	0	3	0	1	0	1	1	1	0	3	1	1	0	4	11	17	16	3	14	0	0	2	3	2	0	2	0	3	0	1	1
CUT_GIM_0769	CUT_GIM_0769	CUT_GIM_0769	12	4	4	29	52	36	234	32	50	58	1	18	6	3	9	22	21	16	8	2	5	10	11	21	13	7	4	20	53	32	20	13	23	14	14	8	21	5	24	11	19	10	31	5	11	9	9
CUT_GIM_0770	CUT_GIM_0770	CUT_GIM_0770	78	34	55	68	53	69	1568	321	289	366	1	129	21	27	24	145	72	98	17	13	32	56	87	151	84	58	55	46	54	61	135	134	131	90	14	60	74	47	63	71	66	62	65	33	70	50	72
CUT_GIM_0771	CUT_GIM_0771	CUT_GIM_0771	0	1	0	0	0	0	0	1	5	0	1	2	0	0	0	0	0	0	0	0	0	0	0	0	0	2	0	0	0	0	0	0	2	0	14	1	0	0	0	0	0	0	0	0	0	0	0
CUT_GIM_0772	CUT_GIM_0772	CUT_GIM_0772	0	0	0	0	0	0	12	7	10	0	0	1	0	0	0	0	0	0	0	0	0	0	0	0	0	0	0	0	0	0	1	3	5	0	0	0	0	0	0	0	0	0	0	0	0	0	0
CUT_GIM_0773	CUT_GIM_0773	CUT_GIM_0773	4	1	6	2	3	1	70	22	49	10	0	1	0	0	3	6	3	0	0	1	0	2	2	2	4	2	6	1	3	1	6	9	22	2	0	0	0	0	8	3	3	0	0	3	0	2	2
CUT_GIM_0774	CUT_GIM_0774	CUT_GIM_0774	6	4	7	15	18	15	230	186	169	33	1	27	1	8	5	20	9	25	3	2	5	16	12	21	6	7	7	10	18	13	20	77	77	8	14	13	4	14	13	10	8	16	12	5	11	14	10
CUT_GIM_0775	CUT_GIM_0775	CUT_GIM_0775	0	1	1	0	1	1	22	5	4	0	0	0	0	0	1	2	0	1	0	0	0	1	2	2	0	2	1	0	1	1	2	2	2	0	0	0	0	0	3	1	0	1	0	0	0	1	2
CUT_GIM_0776	CUT_GIM_0776	CUT_GIM_0776	0	0	0	0	0	0	0	1	2	0	0	0	0	0	0	0	0	0	0	0	0	0	0	0	0	0	0	0	0	0	0	0	1	0	0	0	0	0	0	0	0	0	0	0	0	0	0
CUT_GIM_0777	CUT_GIM_0777	CUT_GIM_0777	0	0	1	2	0	1	30	5	7	3	0	4	0	0	0	2	1	0	0	1	0	1	0	1	0	0	1	1	0	1	3	2	3	1	0	2	0	0	0	1	1	0	0	3	0	1	0
CUT_GIM_0778	CUT_GIM_0778	CUT_GIM_0778	1	2	4	5	3	2	44	9	13	16	0	8	0	0	1	13	3	7	1	0	1	0	2	8	1	3	4	3	3	2	4	4	6	4	0	4	0	0	3	6	3	4	4	0	2	0	2
CUT_GIM_0779	CUT_GIM_0779	CUT_GIM_0779	113	32	75	42	58	90	476	67	56	400	2	82	17	32	26	216	102	179	11	13	21	131	131	212	121	55	75	29	59	80	41	28	25	99	27	38	60	56	68	106	94	113	42	33	46	116	108
CUT_GIM_0780	CUT_GIM_0780	CUT_GIM_0780	3	3	3	12	10	13	64	13	16	25	2	19	4	3	4	15	10	10	2	2	7	4	6	8	3	5	3	8	10	11	6	5	7	6	27	9	14	5	10	7	9	6	8	5	15	4	5
CUT_GIM_0781	CUT_GIM_0781	CUT_GIM_0781	7	3	3	12	8	9	288	45	60	33	1	53	3	5	0	38	14	17	1	2	11	9	22	27	8	5	3	8	8	8	25	19	27	8	14	25	11	9	0	19	13	11	4	5	24	8	18
CUT_GIM_0782	CUT_GIM_0782	CUT_GIM_0782	0	0	0	0	0	0	2	0	2	0	0	0	0	1	0	1	0	1	0	0	0	0	0	0	0	0	0	0	0	0	0	0	1	0	0	0	0	2	0	0	0	1	0	0	0	0	0
CUT_GIM_0783	CUT_GIM_0783	CUT_GIM_0783	1483	1083	2160	2194	1444	1650	16754	6676	4438	4864	57	2092	597	1225	877	6220	4672	9030	489	1100	1000	3686	6825	8122	1591	1850	2148	1495	1461	1459	1444	2780	2017	1199	778	976	2118	2132	2296	3057	4311	5676	1878	2766	2199	3275	5627
CUT_GIM_0784	CUT_GIM_0784	CUT_GIM_0784	2	0	1	1	2	2	18	3	10	6	0	6	0	2	0	2	4	4	0	1	0	2	2	2	2	0	1	1	2	2	2	1	5	1	0	3	0	3	0	1	4	3	0	3	0	2	2
CUT_GIM_0785	CUT_GIM_0785	CUT_GIM_0785	3	5	1	11	8	8	116	37	43	30	0	13	1	1	1	7	5	5	1	1	2	5	3	7	3	9	1	7	8	7	10	15	20	7	0	6	4	2	3	3	5	3	4	3	4	4	2
CUT_GIM_0786	CUT_GIM_0786	CUT_GIM_0786	8	4	5	105	60	93	96	23	23	19	0	13	4	5	5	30	12	25	4	3	6	13	20	26	9	7	5	72	61	82	8	10	10	5	0	6	14	9	13	15	11	16	15	8	13	12	16
CUT_GIM_0787	CUT_GIM_0787	CUT_GIM_0787	0	0	0	10	3	4	40	11	14	30	0	6	1	3	3	4	5	5	0	2	0	4	10	7	0	0	0	7	3	4	3	5	6	7	0	3	4	5	8	2	5	3	0	5	0	4	8
CUT_GIM_0788	CUT_GIM_0788	CUT_GIM_0788	0	0	0	0	0	0	2	0	1	0	0	0	0	1	0	0	1	2	0	0	0	0	0	0	0	0	0	0	0	0	0	0	0	0	0	0	0	2	0	0	1	1	0	0	0	0	0
CUT_GIM_0789	CUT_GIM_0789	CUT_GIM_0789	12	4	4	36	57	40	266	38	56	62	1	24	7	3	10	22	22	17	8	3	8	11	12	22	13	7	4	25	58	35	23	16	25	15	14	11	25	5	26	11	20	11	31	8	18	10	10
CUT_GIM_0790	CUT_GIM_0790	CUT_GIM_0790	10	5	15	34	17	10	440	92	68	36	0	23	2	10	4	8	4	10	2	7	7	6	14	15	11	9	15	23	17	9	38	38	31	9	0	11	7	17	10	4	4	6	8	18	15	5	12
CUT_GIM_0791	CUT_GIM_0791	CUT_GIM_0791	1	0	0	0	0	0	2	0	0	2	0	1	0	0	1	0	1	1	0	0	0	0	0	0	1	0	0	0	0	0	0	0	0	0	0	0	0	0	3	0	1	1	0	0	0	0	0
CUT_GIM_0792	CUT_GIM_0792	CUT_GIM_0792	3	0	2	5	1	2	46	23	18	3	0	0	0	1	1	2	1	2	0	0	0	2	1	8	3	0	2	3	1	2	4	10	8	1	0	0	0	2	3	1	1	1	0	0	0	2	1
CUT_GIM_0793	CUT_GIM_0793	CUT_GIM_0793	4	3	0	2	0	0	84	13	12	5	0	0	0	2	1	0	0	1	0	0	0	0	0	2	4	5	0	1	0	0	7	5	5	1	0	0	0	3	3	0	0	1	0	0	0	0	0
CUT_GIM_0794	CUT_GIM_0794	CUT_GIM_0794	8	0	13	20	10	6	306	114	90	24	0	9	2	8	7	11	9	8	1	1	5	4	5	16	9	0	13	14	10	5	26	47	41	6	0	4	7	14	18	5	8	5	4	3	11	4	4
CUT_GIM_0795	CUT_GIM_0795	CUT_GIM_0795	0	2	2	1	0	0	34	50	49	2	0	1	0	0	0	0	1	0	2	0	0	0	0	3	0	3	2	1	0	0	3	21	22	0	0	0	0	0	0	0	1	0	8	0	0	0	0
CUT_GIM_0796	CUT_GIM_0796	CUT_GIM_0796	0	1	1	3	4	1	14	22	8	10	0	7	0	4	0	3	3	1	1	1	0	8	3	5	0	2	1	2	4	1	1	9	4	2	0	3	0	7	0	1	3	1	4	3	0	7	2
CUT_GIM_0797	CUT_GIM_0797	CUT_GIM_0797	1	2	2	2	4	0	20	10	14	1	0	1	0	1	0	1	1	3	0	0	1	1	1	4	1	3	2	1	4	0	2	4	6	0	0	0	0	2	0	0	1	2	0	0	2	1	1
CUT_GIM_0798	CUT_GIM_0798	CUT_GIM_0798	12	12	19	107	102	101	356	128	133	80	0	71	8	18	10	34	15	35	4	13	13	19	20	40	13	21	19	73	103	89	31	53	60	20	0	33	28	31	26	17	14	22	15	33	29	17	16
CUT_GIM_0799	CUT_GIM_0799	CUT_GIM_0799	2	7	7	4	2	3	206	90	64	9	0	2	2	1	0	6	3	4	1	1	5	4	5	7	2	12	7	3	2	3	18	37	29	2	0	1	7	2	0	3	3	3	4	3	11	4	4
CUT_GIM_0800	CUT_GIM_0800	CUT_GIM_0800	10	3	9	7	7	9	128	37	34	70	0	19	0	7	2	15	9	16	2	4	5	8	14	22	11	5	9	5	7	8	11	15	15	17	0	9	0	12	5	7	8	10	8	10	11	7	12
CUT_GIM_0801	CUT_GIM_0801	CUT_GIM_0801	4	1	8	14	7	15	204	44	31	52	0	30	2	9	6	23	13	13	7	6	5	8	9	36	4	2	8	10	7	13	18	18	14	13	0	14	7	16	16	11	12	8	27	15	11	7	7
CUT_GIM_0802	CUT_GIM_0802	CUT_GIM_0802	0	0	0	0	0	1	4	2	5	1	0	1	0	0	0	0	0	0	0	0	0	1	0	0	0	0	0	0	0	1	0	1	2	0	0	0	0	0	0	0	0	0	0	0	0	1	0
CUT_GIM_0803	CUT_GIM_0803	CUT_GIM_0803	12	6	14	30	21	15	598	130	88	58	1	29	5	2	7	25	12	16	6	4	4	11	15	21	13	10	14	20	21	13	52	54	40	14	14	14	18	3	18	12	11	10	23	10	9	10	12
CUT_GIM_0804	CUT_GIM_0804	CUT_GIM_0804	4	1	1	0	1	0	20	15	15	2	0	0	0	0	1	0	0	0	0	0	0	0	0	0	4	2	1	0	1	0	2	6	7	0	0	0	0	0	3	0	0	0	0	0	0	0	0
CUT_GIM_0805	CUT_GIM_0805	CUT_GIM_0805	5	4	9	8	7	8	204	47	39	2	0	5	0	2	2	13	1	4	0	1	1	3	5	3	5	7	9	5	7	7	18	20	18	0	0	2	0	3	5	6	1	3	0	3	2	3	4
CUT_GIM_0806	CUT_GIM_0806	CUT_GIM_0806	0	0	1	1	0	0	22	16	22	3	0	2	0	0	0	0	0	0	0	0	0	0	0	0	0	0	1	1	0	0	2	7	10	1	0	1	0	0	0	0	0	0	0	0	0	0	0
CUT_GIM_0807	CUT_GIM_0807	CUT_GIM_0807	8	0	13	20	10	6	298	113	87	24	0	9	2	8	7	11	9	8	1	1	5	4	5	16	9	0	13	14	10	5	26	47	40	6	0	4	7	14	18	5	8	5	4	3	11	4	4
CUT_GIM_0808	CUT_GIM_0808	CUT_GIM_0808	2	1	2	2	1	1	12	5	5	10	0	4	0	0	1	1	1	1	1	0	1	0	2	0	2	2	2	1	1	1	1	2	2	2	0	2	0	0	3	0	1	1	4	0	2	0	2
CUT_GIM_0809	CUT_GIM_0809	CUT_GIM_0809	1	1	2	1	0	1	32	14	10	1	0	0	1	0	0	1	1	0	0	0	0	0	2	0	1	2	2	1	0	1	3	6	5	0	0	0	4	0	0	0	1	0	0	0	0	0	2
CUT_GIM_0810	CUT_GIM_0810	CUT_GIM_0810	241	46	90	84	83	104	778	124	157	733	3	200	20	59	37	294	139	242	17	35	46	130	193	283	258	79	90	57	84	92	67	52	71	181	41	93	71	103	97	144	128	152	65	88	101	115	159
CUT_GIM_0811	CUT_GIM_0811	CUT_GIM_0811	1	2	3	8	7	7	126	43	33	18	0	10	3	3	2	12	4	5	1	4	3	2	5	9	1	3	3	5	7	6	11	18	15	4	0	5	11	5	5	6	4	3	4	10	7	2	4
CUT_GIM_0812	CUT_GIM_0812	CUT_GIM_0812	0	0	0	1	0	0	4	6	7	0	0	0	0	0	0	0	0	0	0	0	0	0	0	0	0	0	0	1	0	0	0	2	3	0	0	0	0	0	0	0	0	0	0	0	0	0	0
CUT_GIM_0813	CUT_GIM_0813	CUT_GIM_0813	0	2	3	0	3	1	60	8	10	0	0	5	1	2	0	3	0	1	0	0	0	2	0	0	0	3	3	0	3	1	5	3	5	0	0	2	4	3	0	1	0	1	0	0	0	2	0
CUT_GIM_0814	CUT_GIM_0814	CUT_GIM_0814	0	0	3	2	1	0	10	18	12	2	0	2	0	0	1	1	0	0	0	0	0	1	1	3	0	0	3	1	1	0	1	7	5	0	0	1	0	0	3	0	0	0	0	0	0	1	1
CUT_GIM_0815	CUT_GIM_0815	CUT_GIM_0815	0	0	0	0	1	0	22	8	12	0	0	0	0	0	0	0	0	0	0	0	0	1	0	1	0	0	0	0	1	0	2	3	5	0	0	0	0	0	0	0	0	0	0	0	0	1	0
CUT_GIM_0816	CUT_GIM_0816	CUT_GIM_0816	3705	1934	4140	2022	1634	1550	49642	10253	7325	12927	206	5316	345	916	628	3339	2345	4787	318	605	621	2129	3265	4108	3974	3304	4118	1378	1653	1370	4279	4270	3329	3186	2813	2480	1224	1595	1644	1641	2164	3009	1221	1521	1366	1891	2692
CUT_GIM_0817	CUT_GIM_0817	CUT_GIM_0817	33	20	44	84	73	72	726	124	154	167	4	66	8	35	24	91	63	108	12	25	28	42	79	112	35	34	44	57	74	64	63	52	70	41	55	31	28	61	63	45	58	68	46	63	62	37	65
CUT_GIM_0818	CUT_GIM_0818	CUT_GIM_0818	0	0	0	0	0	0	4	1	2	0	0	1	0	0	0	0	0	0	0	0	0	1	1	2	0	0	0	0	0	0	0	0	1	0	0	0	0	0	0	0	0	0	0	0	0	1	1
CUT_GIM_0819	CUT_GIM_0819	CUT_GIM_0819	0	1	3	3	2	2	42	4	12	15	0	25	1	0	0	1	1	2	0	0	0	1	2	0	0	2	3	2	2	2	4	2	5	4	0	12	4	0	0	0	1	1	0	0	0	1	2
CUT_GIM_0820	CUT_GIM_0820	CUT_GIM_0820	15	6	23	13	15	18	738	57	67	77	0	18	3	7	10	53	20	31	4	6	5	32	28	57	16	10	23	9	15	16	64	24	30	19	0	8	11	12	26	26	18	19	15	15	11	28	23
CUT_GIM_0821	CUT_GIM_0821	CUT_GIM_0821	30	13	23	28	35	46	304	69	58	119	0	50	1	18	9	39	22	50	11	21	17	23	41	60	32	22	23	19	35	41	26	29	26	29	0	23	4	31	24	19	20	31	42	53	37	20	34
CUT_GIM_0822	CUT_GIM_0822	CUT_GIM_0822	1	1	0	0	0	0	16	1	7	1	0	0	0	0	0	1	1	0	0	0	0	0	0	0	1	2	0	0	0	0	1	0	3	0	0	0	0	0	0	0	1	0	0	0	0	0	0
CUT_GIM_0823	CUT_GIM_0823	CUT_GIM_0823	37	19	37	69	51	52	814	177	155	211	10	131	12	34	25	79	34	67	15	16	24	39	33	82	40	32	37	47	52	46	70	74	70	52	137	61	43	59	65	39	31	42	58	40	53	35	27
CUT_GIM_0824	CUT_GIM_0824	CUT_GIM_0824	0	1	2	2	0	0	44	21	16	1	0	0	0	0	0	0	1	1	1	1	0	3	1	0	0	2	2	1	0	0	4	9	7	0	0	0	0	0	0	0	1	1	4	3	0	3	1
CUT_GIM_0825	CUT_GIM_0825	CUT_GIM_0825	13	2	11	11	3	8	224	43	31	18	0	14	1	3	1	7	2	11	1	0	0	5	5	11	14	3	11	7	3	7	19	18	14	4	0	7	4	5	3	3	2	7	4	0	0	4	4
CUT_GIM_0826	CUT_GIM_0826	CUT_GIM_0826	9	4	11	47	29	24	346	91	101	41	0	33	7	5	4	18	12	21	2	1	10	13	18	28	10	7	11	32	29	21	30	38	46	10	0	15	25	9	10	9	11	13	8	3	22	12	15
CUT_GIM_0827	CUT_GIM_0827	CUT_GIM_0827	0	0	0	0	1	0	30	19	27	0	0	1	0	0	0	3	0	1	1	0	0	1	1	2	0	0	0	0	1	0	3	8	12	0	0	0	0	0	0	1	0	1	4	0	0	1	1
CUT_GIM_0828	CUT_GIM_0828	CUT_GIM_0828	1	1	0	5	0	0	10	13	23	2	0	1	0	0	0	3	0	1	1	0	0	0	2	0	1	2	0	3	0	0	1	5	10	0	0	0	0	0	0	1	0	1	4	0	0	0	2
CUT_GIM_0829	CUT_GIM_0829	CUT_GIM_0829	0	0	0	5	1	1	74	13	16	13	0	4	0	3	1	2	1	4	1	0	2	0	3	2	0	0	0	3	1	1	6	5	7	3	0	2	0	5	3	1	1	3	4	0	4	0	2
CUT_GIM_0830	CUT_GIM_0830	CUT_GIM_0830	12	10	13	21	20	17	304	128	152	51	0	24	4	6	2	18	14	7	3	3	4	10	10	15	13	17	13	14	20	15	26	53	69	13	0	11	14	10	5	9	13	4	12	8	9	9	8
CUT_GIM_0831	CUT_GIM_0831	CUT_GIM_0831	26	6	19	9	24	29	324	47	29	145	0	23	10	5	4	57	38	68	2	8	10	19	48	71	28	10	19	6	24	26	28	20	13	36	0	11	35	9	10	28	35	43	8	20	22	17	40
CUT_GIM_0832	CUT_GIM_0832	CUT_GIM_0832	0	0	0	0	0	1	40	0	1	5	0	3	0	0	1	1	2	1	0	0	0	1	0	1	0	0	0	0	0	1	3	0	0	1	0	1	0	0	3	0	2	1	0	0	0	1	0
CUT_GIM_0833	CUT_GIM_0833	CUT_GIM_0833	1	0	0	1	0	0	14	1	5	1	1	0	0	0	0	0	1	0	0	0	0	1	0	1	1	0	0	1	0	0	1	0	2	0	14	0	0	0	0	0	1	0	0	0	0	1	0
CUT_GIM_0834	CUT_GIM_0834	CUT_GIM_0834	0	0	0	0	0	0	16	12	12	3	0	0	0	0	0	0	0	0	0	1	0	0	0	1	0	0	0	0	0	0	1	5	5	1	0	0	0	0	0	0	0	0	0	3	0	0	0
CUT_GIM_0835	CUT_GIM_0835	CUT_GIM_0835	1	1	5	1	3	2	64	27	38	25	0	7	2	2	1	11	2	9	0	1	2	2	5	13	1	2	5	1	3	2	6	11	17	6	0	3	7	3	3	5	2	6	0	3	4	2	4
CUT_GIM_0836	CUT_GIM_0836	CUT_GIM_0836	0	0	0	0	0	0	12	3	4	1	0	0	0	0	0	0	0	0	0	0	0	0	0	1	0	0	0	0	0	0	1	1	2	0	0	0	0	0	0	0	0	0	0	0	0	0	0
CUT_GIM_0837	CUT_GIM_0837	CUT_GIM_0837	0	0	0	0	0	0	12	1	4	1	0	0	0	0	0	1	0	0	0	0	0	0	1	1	0	0	0	0	0	0	1	0	2	0	0	0	0	0	0	0	0	0	0	0	0	0	1
CUT_GIM_0838	CUT_GIM_0838	CUT_GIM_0838	0	1	1	1	0	0	48	16	32	0	0	0	0	0	0	2	2	0	0	0	1	0	0	1	0	2	1	1	0	0	4	7	15	0	0	0	0	0	0	1	2	0	0	0	2	0	0
CUT_GIM_0839	CUT_GIM_0839	CUT_GIM_0839	1	1	1	0	3	1	30	27	17	5	0	4	0	0	0	3	7	2	1	1	0	3	2	3	1	2	1	0	3	1	3	11	8	1	0	2	0	0	0	1	6	1	4	3	0	3	2
CUT_GIM_0840	CUT_GIM_0840	CUT_GIM_0840	230	106	264	338	276	300	4158	683	373	838	7	337	39	72	44	406	232	389	41	68	71	177	316	480	247	181	263	230	279	265	358	284	170	207	96	157	138	125	115	200	214	245	157	171	156	157	261
CUT_GIM_0841	CUT_GIM_0841	CUT_GIM_0841	19	18	19	82	60	40	588	193	198	85	0	54	7	11	4	29	24	18	4	10	10	13	15	27	20	31	19	56	61	35	51	80	90	21	0	25	25	19	10	14	22	11	15	25	22	12	12
CUT_GIM_0842	CUT_GIM_0842	CUT_GIM_0842	1	0	1	2	1	0	26	11	9	1	0	2	0	0	0	1	0	0	0	1	0	2	0	0	1	0	1	1	1	0	2	5	4	0	0	1	0	0	0	0	0	0	0	3	0	2	0
CUT_GIM_0843	CUT_GIM_0843	CUT_GIM_0843	5	1	13	50	56	55	286	56	48	116	2	70	8	17	6	49	26	48	10	13	19	36	40	49	5	2	13	34	57	49	25	23	22	29	27	33	28	30	16	24	24	30	38	33	42	32	33
CUT_GIM_0844	CUT_GIM_0844	CUT_GIM_0844	50	37	59	100	80	120	1354	388	253	181	1	56	14	29	17	109	41	80	21	22	21	61	57	102	54	63	59	68	81	106	117	162	115	45	14	26	50	50	45	54	38	50	81	55	46	54	47
CUT_GIM_0845	CUT_GIM_0845	CUT_GIM_0845	141	32	62	63	54	64	1614	409	403	314	2	233	26	45	34	183	111	200	11	36	43	64	129	242	151	55	62	43	55	57	139	170	183	77	27	109	92	78	89	90	102	126	42	91	95	57	106
CUT_GIM_0846	CUT_GIM_0846	CUT_GIM_0846	5	5	6	5	2	2	186	39	33	25	0	10	2	0	0	7	2	8	0	0	1	4	3	9	5	9	6	3	2	2	16	16	15	6	0	5	7	0	0	3	2	5	0	0	2	4	2
CUT_GIM_0847	CUT_GIM_0847	CUT_GIM_0847	0	1	0	0	0	0	14	10	11	0	0	0	0	0	0	1	0	0	1	1	0	1	2	1	0	2	0	0	0	0	1	4	5	0	0	0	0	0	0	0	0	0	4	3	0	1	2
CUT_GIM_0848	CUT_GIM_0848	CUT_GIM_0848	0	0	0	0	0	0	40	16	16	5	0	0	1	0	1	3	0	1	0	0	0	2	1	3	0	0	0	0	0	0	3	7	7	1	0	0	4	0	3	1	0	1	0	0	0	2	1
CUT_GIM_0849	CUT_GIM_0849	CUT_GIM_0849	1	0	1	3	5	4	54	3	8	40	0	5	1	5	7	30	8	12	2	1	5	4	5	21	1	0	1	2	5	4	5	1	4	10	0	2	4	9	18	15	7	8	8	3	11	4	4
CUT_GIM_0850	CUT_GIM_0850	CUT_GIM_0850	5	5	4	15	14	15	226	54	42	21	0	9	0	2	1	10	6	7	1	0	1	6	10	11	5	9	4	10	14	13	19	22	19	5	0	4	0	3	3	5	6	4	4	0	2	5	8
CUT_GIM_0851	CUT_GIM_0851	CUT_GIM_0851	1	0	1	1	1	1	26	9	11	8	0	3	0	2	0	3	1	1	0	0	0	1	2	2	1	0	1	1	1	1	2	4	5	2	0	1	0	3	0	1	1	1	0	0	0	1	2
CUT_GIM_0852	CUT_GIM_0852	CUT_GIM_0852	3	0	3	2	4	3	32	18	16	4	0	4	0	1	0	0	0	1	1	0	0	0	0	4	3	0	3	1	4	3	3	7	7	1	0	2	0	2	0	0	0	1	4	0	0	0	0
CUT_GIM_0853	CUT_GIM_0853	CUT_GIM_0853	0	0	2	1	1	0	22	15	17	1	0	1	0	0	0	1	3	2	0	0	0	0	1	3	0	0	2	1	1	0	2	6	8	0	0	0	0	0	0	0	3	1	0	0	0	0	1
CUT_GIM_0854	CUT_GIM_0854	CUT_GIM_0854	2	0	6	3	2	2	154	34	51	13	2	10	0	0	1	5	1	4	0	2	1	4	0	5	2	0	6	2	2	2	13	14	23	3	27	5	0	0	3	2	1	3	0	5	2	4	0
CUT_GIM_0855	CUT_GIM_0855	CUT_GIM_0855	8	2	8	19	25	19	126	35	32	26	0	21	2	4	0	8	11	15	1	0	3	7	13	10	9	3	8	13	25	17	11	15	15	6	0	10	7	7	0	4	10	9	4	0	7	6	11
CUT_GIM_0856	CUT_GIM_0856	CUT_GIM_0856	1	0	0	0	0	3	12	6	1	3	0	1	0	0	0	5	0	0	0	1	1	3	0	2	1	0	0	0	0	3	1	2	0	1	0	0	0	0	0	2	0	0	0	3	2	3	0
CUT_GIM_0857	CUT_GIM_0857	CUT_GIM_0857	0	1	0	0	0	0	14	3	9	0	0	1	0	0	0	1	0	0	0	0	0	0	0	0	0	2	0	0	0	0	1	1	4	0	0	0	0	0	0	0	0	0	0	0	0	0	0
CUT_GIM_0858	CUT_GIM_0858	CUT_GIM_0858	0	1	3	3	1	1	52	25	44	0	0	3	2	2	0	1	0	0	0	0	0	1	0	3	0	2	3	2	1	1	4	10	20	0	0	1	7	3	0	0	0	0	0	0	0	1	0
CUT_GIM_0859	CUT_GIM_0859	CUT_GIM_0859	118	53	91	131	142	165	1138	372	289	422	8	134	13	55	35	219	124	213	19	33	47	132	158	252	127	91	91	89	144	146	98	155	131	104	109	63	46	96	92	108	114	134	73	83	103	117	130
CUT_GIM_0860	CUT_GIM_0860	CUT_GIM_0860	14	12	23	33	32	36	276	44	22	48	0	30	5	6	4	24	8	21	1	5	3	8	18	26	15	21	23	22	32	32	24	18	10	12	0	14	18	10	10	12	7	13	4	13	7	7	15
CUT_GIM_0861	CUT_GIM_0861	CUT_GIM_0861	191	67	116	164	98	128	2184	577	546	413	6	373	66	86	82	316	177	331	33	87	86	112	202	382	205	114	115	112	99	113	188	240	248	102	82	174	234	150	215	155	163	208	127	219	189	99	167
CUT_GIM_0862	CUT_GIM_0862	CUT_GIM_0862	1	0	0	3	0	0	26	8	6	2	0	1	0	0	0	1	0	0	0	0	0	0	3	2	1	0	0	2	0	0	2	3	3	0	0	0	0	0	0	0	0	0	0	0	0	0	2
CUT_GIM_0863	CUT_GIM_0863	CUT_GIM_0863	14	1	9	23	13	13	208	50	41	40	1	42	4	14	3	14	11	9	3	4	4	14	6	17	15	2	9	16	13	11	18	21	19	10	14	20	14	24	8	7	10	6	12	10	9	12	5
CUT_GIM_0864	CUT_GIM_0864	CUT_GIM_0864	0	1	2	1	0	0	20	11	9	1	1	1	0	0	0	0	0	0	2	0	0	0	1	2	0	2	2	1	0	0	2	5	4	0	14	0	0	0	0	0	0	0	8	0	0	0	1
CUT_GIM_0865	CUT_GIM_0865	CUT_GIM_0865	4	4	4	3	3	2	76	27	32	21	0	17	0	5	0	15	9	5	1	2	2	4	6	12	4	7	4	2	3	2	7	11	15	5	0	8	0	9	0	7	8	3	4	5	4	4	5
CUT_GIM_0866	CUT_GIM_0866	CUT_GIM_0866	1	0	1	8	6	3	36	21	28	11	0	5	0	2	2	10	5	2	0	0	2	7	3	7	1	0	1	5	6	3	3	9	13	3	0	2	0	3	5	5	5	1	0	0	4	6	2
CUT_GIM_0867	CUT_GIM_0867	CUT_GIM_0867	1	2	0	2	3	2	64	33	68	7	0	1	2	1	1	8	0	5	1	2	4	2	2	2	1	3	0	1	3	2	6	14	31	2	0	0	7	2	3	4	0	3	4	5	9	2	2
CUT_GIM_0868	CUT_GIM_0868	CUT_GIM_0868	0	0	0	0	0	0	2	3	8	1	0	0	0	0	0	2	0	0	0	0	1	0	0	0	0	0	0	0	0	0	0	1	4	0	0	0	0	0	0	1	0	0	0	0	2	0	0
CUT_GIM_0869	CUT_GIM_0869	CUT_GIM_0869	0	1	0	0	0	0	20	8	7	2	0	1	0	1	0	0	1	0	0	0	0	1	0	1	0	2	0	0	0	0	2	3	3	0	0	0	0	2	0	0	1	0	0	0	0	1	0
CUT_GIM_0870	CUT_GIM_0870	CUT_GIM_0870	0	0	0	0	0	0	36	19	30	1	0	0	0	0	0	0	0	2	0	0	0	2	1	4	0	0	0	0	0	0	3	8	14	0	0	0	0	0	0	0	0	1	0	0	0	2	1
CUT_GIM_0871	CUT_GIM_0871	CUT_GIM_0871	2	0	7	6	10	10	50	24	35	15	0	19	0	0	0	2	0	3	0	0	0	1	1	2	2	0	7	4	10	9	4	10	16	4	0	9	0	0	0	1	0	2	0	0	0	1	1
CUT_GIM_0872	CUT_GIM_0872	CUT_GIM_0872	7	6	2	35	21	19	108	56	66	11	1	16	3	3	4	12	4	10	1	4	3	4	5	9	8	10	2	24	21	17	9	23	30	3	14	7	11	5	10	6	4	6	4	10	7	4	4
CUT_GIM_0873	CUT_GIM_0873	CUT_GIM_0873	1	0	3	2	0	0	32	6	9	7	0	1	1	0	0	5	1	1	0	0	0	0	2	1	1	0	3	1	0	0	3	2	4	2	0	0	4	0	0	2	1	1	0	0	0	0	2
CUT_GIM_0874	CUT_GIM_0874	CUT_GIM_0874	0	1	0	1	0	0	18	18	22	3	0	2	0	0	0	1	0	0	0	0	0	0	1	3	0	2	0	1	0	0	2	7	10	1	0	1	0	0	0	0	0	0	0	0	0	0	1
CUT_GIM_0875	CUT_GIM_0875	CUT_GIM_0875	0	0	0	0	0	0	8	7	14	1	0	1	0	1	1	1	1	1	0	1	0	1	0	0	0	0	0	0	0	0	1	3	6	0	0	0	0	2	3	0	1	1	0	3	0	1	0
CUT_GIM_0876	CUT_GIM_0876	CUT_GIM_0876	1176	695	1337	1196	1545	1493	10296	3022	2359	3936	71	2383	287	793	487	3058	2614	4299	261	558	715	2017	3027	4181	1261	1187	1330	815	1563	1320	887	1258	1072	970	969	1112	1018	1380	1275	1503	2412	2702	1002	1403	1573	1792	2496
CUT_GIM_0877	CUT_GIM_0877	CUT_GIM_0877	0	2	5	5	8	13	206	25	31	17	0	4	1	0	3	4	3	7	0	1	1	2	3	3	0	3	5	3	8	11	18	10	14	4	0	2	4	0	8	2	3	4	0	3	2	2	2
CUT_GIM_0878	CUT_GIM_0878	CUT_GIM_0878	4	6	5	14	7	4	280	58	63	29	1	10	0	1	1	5	3	0	2	1	0	5	2	6	4	10	5	10	7	4	24	24	29	7	14	5	0	2	3	2	3	0	8	3	0	4	2
CUT_GIM_0879	CUT_GIM_0879	CUT_GIM_0879	0	0	0	0	0	0	32	11	12	5	0	0	0	0	0	1	1	0	0	0	0	0	0	2	0	0	0	0	0	0	3	5	5	1	0	0	0	0	0	0	1	0	0	0	0	0	0
CUT_GIM_0880	CUT_GIM_0880	CUT_GIM_0880	0	0	0	0	0	0	2	6	8	1	0	1	0	0	0	0	0	0	0	0	0	0	1	0	0	0	0	0	0	0	0	2	4	0	0	0	0	0	0	0	0	0	0	0	0	0	1
CUT_GIM_0881	CUT_GIM_0881	CUT_GIM_0881	0	0	0	0	0	0	2	4	8	1	0	0	0	0	0	2	0	0	0	0	1	0	0	0	0	0	0	0	0	0	0	2	4	0	0	0	0	0	0	1	0	0	0	0	2	0	0
CUT_GIM_0882	CUT_GIM_0882	CUT_GIM_0882	0	0	1	2	0	0	34	16	23	5	0	0	0	1	0	3	1	1	1	0	0	2	0	4	0	0	1	1	0	0	3	7	10	1	0	0	0	2	0	1	1	1	4	0	0	2	0
CUT_GIM_0883	CUT_GIM_0883	CUT_GIM_0883	1	0	0	2	0	0	16	5	3	1	0	1	0	0	0	2	0	2	0	0	1	0	0	0	1	0	0	1	0	0	1	2	1	0	0	0	0	0	0	1	0	1	0	0	2	0	0
CUT_GIM_0884	CUT_GIM_0884	CUT_GIM_0884	20	7	22	45	63	61	1506	272	218	134	3	56	14	22	7	46	20	31	6	14	12	20	19	48	21	12	22	31	64	54	130	113	99	33	41	26	50	38	18	23	18	19	23	35	26	18	16
CUT_GIM_0885	CUT_GIM_0885	CUT_GIM_0885	0	0	0	0	0	0	2	2	2	0	0	0	0	0	0	0	0	1	0	0	0	0	0	0	0	0	0	0	0	0	0	1	1	0	0	0	0	0	0	0	0	1	0	0	0	0	0
CUT_GIM_0886	CUT_GIM_0886	CUT_GIM_0886	14	12	20	20	21	19	800	149	153	74	1	60	7	10	7	45	11	34	3	3	8	18	14	29	15	21	20	14	21	17	69	62	70	18	14	28	25	17	18	22	10	21	12	8	18	16	12
CUT_GIM_0887	CUT_GIM_0887	CUT_GIM_0887	1	0	0	0	0	1	30	8	3	2	0	1	0	0	0	1	0	0	0	0	0	1	0	1	1	0	0	0	0	1	3	3	1	0	0	0	0	0	0	0	0	0	0	0	0	1	0
CUT_GIM_0888	CUT_GIM_0888	CUT_GIM_0888	3	0	5	1	1	0	150	31	18	1	0	1	0	1	0	1	1	1	1	0	0	0	1	2	3	0	5	1	1	0	13	13	8	0	0	0	0	2	0	0	1	1	4	0	0	0	1
CUT_GIM_0889	CUT_GIM_0889	CUT_GIM_0889	7	2	3	8	5	4	240	63	50	28	0	14	0	1	2	10	3	3	1	0	1	5	2	12	8	3	3	5	5	4	21	26	23	7	0	7	0	2	5	5	3	2	4	0	2	4	2
CUT_GIM_0890	CUT_GIM_0890	CUT_GIM_0890	6	4	5	23	13	14	126	44	47	41	0	24	5	11	2	25	10	11	2	3	2	9	8	18	6	7	5	16	13	12	11	18	21	10	0	11	18	19	5	12	9	7	8	8	4	8	7
CUT_GIM_0891	CUT_GIM_0891	CUT_GIM_0891	11	4	7	20	13	10	800	162	136	44	1	42	4	2	4	18	4	9	4	0	2	6	8	18	12	7	7	14	13	9	69	67	62	11	14	20	14	3	10	9	4	6	15	0	4	5	7
CUT_GIM_0892	CUT_GIM_0892	CUT_GIM_0892	50	8	26	28	31	32	362	75	76	227	2	52	3	8	5	54	28	44	1	8	10	21	30	58	54	14	26	19	31	28	31	31	35	56	27	24	11	14	13	27	26	28	4	20	22	19	25
CUT_GIM_0893	CUT_GIM_0893	CUT_GIM_0893	25	9	33	84	83	84	1790	338	268	155	4	75	16	29	10	59	27	39	6	17	14	28	29	56	27	15	33	57	84	74	154	141	122	38	55	35	57	50	26	29	25	25	23	43	31	25	24
CUT_GIM_0894	CUT_GIM_0894	CUT_GIM_0894	18	7	18	44	55	23	442	78	82	161	3	61	14	17	15	44	40	49	8	9	8	26	24	47	19	12	18	30	56	20	38	32	37	40	41	28	50	30	39	22	37	31	31	23	18	23	20
CUT_GIM_0895	CUT_GIM_0895	CUT_GIM_0895	15	4	11	25	26	22	148	31	36	44	1	19	2	11	6	17	6	11	3	8	4	15	18	20	16	7	11	17	26	19	13	13	16	11	14	9	7	19	16	8	6	7	12	20	9	13	15
CUT_GIM_0896	CUT_GIM_0896	CUT_GIM_0896	15	1	2	5	8	14	100	19	25	33	0	3	2	2	3	18	13	14	4	3	3	19	9	15	16	2	2	3	8	12	9	8	11	8	0	1	7	3	8	9	12	9	15	8	7	17	7
CUT_GIM_0897	CUT_GIM_0897	CUT_GIM_0897	87	26	62	65	58	44	910	205	230	322	2	129	9	44	23	152	77	128	16	25	40	89	99	147	93	44	62	44	59	39	78	85	105	79	27	60	32	77	60	75	71	80	61	63	88	79	82
CUT_GIM_0898	CUT_GIM_0898	CUT_GIM_0898	2	0	1	1	9	2	16	7	4	4	0	4	1	1	1	9	0	0	1	2	1	2	0	2	2	0	1	1	9	2	1	3	2	1	0	2	4	2	3	4	0	0	4	5	2	2	0
CUT_GIM_0899	CUT_GIM_0899	CUT_GIM_0899	1105	497	1068	809	1265	1261	8664	2357	1887	3704	45	2056	206	613	380	2621	2235	3754	176	445	598	1570	2635	3639	1185	849	1062	551	1279	1115	747	982	858	913	614	959	731	1067	995	1288	2062	2360	676	1119	1315	1395	2173
CUT_GIM_0900	CUT_GIM_0900	CUT_GIM_0900	0	2	0	0	2	2	50	20	26	7	0	5	0	0	0	4	3	2	1	0	2	2	0	3	0	3	0	0	2	2	4	8	12	2	0	2	0	0	0	2	3	1	4	0	4	2	0
CUT_GIM_0901	CUT_GIM_0901	CUT_GIM_0901	0	3	0	0	0	0	14	38	26	0	0	1	2	0	0	1	0	0	0	0	0	2	0	1	0	5	0	0	0	0	1	16	12	0	0	0	7	0	0	0	0	0	0	0	0	2	0
CUT_GIM_0902	CUT_GIM_0902	CUT_GIM_0902	3	2	8	3	0	0	98	22	28	17	0	6	2	1	1	6	2	5	3	0	0	4	2	3	3	3	8	2	0	0	8	9	13	4	0	3	7	2	3	3	2	3	12	0	0	4	2
CUT_GIM_0903	CUT_GIM_0903	CUT_GIM_0903	6	2	3	16	12	13	86	30	31	35	0	16	1	10	2	19	10	10	1	3	1	7	7	16	6	3	3	11	12	11	7	12	14	9	0	7	4	17	5	9	9	6	4	8	2	6	6
CUT_GIM_0904	CUT_GIM_0904	CUT_GIM_0904	15	6	1	5	3	5	286	52	38	69	3	37	3	6	2	18	5	13	3	2	2	12	9	22	16	10	1	3	3	4	25	22	17	17	41	17	11	10	5	9	5	8	12	5	4	11	7
CUT_GIM_0905	CUT_GIM_0905	CUT_GIM_0905	0	2	0	1	2	1	38	69	51	2	0	1	0	0	0	5	1	4	0	2	0	1	2	2	0	3	0	1	2	1	3	29	23	0	0	0	0	0	0	2	1	3	0	5	0	1	2
CUT_GIM_0906	CUT_GIM_0906	CUT_GIM_0906	0	0	3	2	1	1	48	19	14	6	0	4	0	1	0	2	4	6	0	1	0	3	2	2	0	0	3	1	1	1	4	8	6	1	0	2	0	2	0	1	4	4	0	3	0	3	2
CUT_GIM_0907	CUT_GIM_0907	CUT_GIM_0907	1	3	1	0	4	2	64	5	10	12	0	5	2	2	3	5	2	7	0	3	1	2	3	5	1	5	1	0	4	2	6	2	5	3	0	2	7	3	8	2	2	4	0	8	2	2	2
CUT_GIM_0908	CUT_GIM_0908	CUT_GIM_0908	0	1	1	3	0	0	28	14	20	3	1	0	0	0	1	0	1	0	0	0	0	0	0	1	0	2	1	2	0	0	2	6	9	1	14	0	0	0	3	0	1	0	0	0	0	0	0
CUT_GIM_0909	CUT_GIM_0909	CUT_GIM_0909	0	0	0	0	0	0	28	41	36	1	0	0	0	0	0	2	0	1	0	0	0	0	0	2	0	0	0	0	0	0	2	17	16	0	0	0	0	0	0	1	0	1	0	0	0	0	0
CUT_GIM_0910	CUT_GIM_0910	CUT_GIM_0910	128	49	100	75	131	139	804	144	114	420	1	92	19	61	32	218	155	314	14	66	64	120	266	389	137	84	99	51	132	123	69	60	52	104	14	43	67	106	84	107	143	197	54	166	141	107	219
CUT_GIM_0911	CUT_GIM_0911	CUT_GIM_0911	0	1	0	4	2	6	46	13	11	18	0	4	0	2	1	2	3	4	2	1	1	2	4	5	0	2	0	3	2	5	4	5	5	4	0	2	0	3	3	1	3	3	8	3	2	2	3
CUT_GIM_0912	CUT_GIM_0912	CUT_GIM_0912	1	1	1	0	2	1	56	22	12	1	0	0	0	0	0	1	0	1	0	0	0	0	0	3	1	2	1	0	2	1	5	9	5	0	0	0	0	0	0	0	0	1	0	0	0	0	0
CUT_GIM_0913	CUT_GIM_0913	CUT_GIM_0913	1	0	1	1	1	0	18	8	8	6	0	2	0	1	3	3	4	0	1	0	0	1	0	2	1	0	1	1	1	0	2	3	4	1	0	1	0	2	8	1	4	0	4	0	0	1	0
CUT_GIM_0914	CUT_GIM_0914	CUT_GIM_0914	0	0	0	0	0	0	10	11	7	0	0	0	0	0	0	0	0	0	0	0	0	0	0	0	0	0	0	0	0	0	1	5	3	0	0	0	0	0	0	0	0	0	0	0	0	0	0
CUT_GIM_0915	CUT_GIM_0915	CUT_GIM_0915	2	1	2	4	2	3	124	24	23	14	1	4	0	0	0	3	0	3	0	0	0	1	0	5	2	2	2	3	2	3	11	10	10	3	14	2	0	0	0	1	0	2	0	0	0	1	0
CUT_GIM_0916	CUT_GIM_0916	CUT_GIM_0916	1	2	2	3	1	2	288	94	98	7	0	3	0	2	0	7	1	2	1	1	0	2	1	9	1	3	2	2	1	2	25	39	45	2	0	1	0	3	0	3	1	1	4	3	0	2	1
CUT_GIM_0917	CUT_GIM_0917	CUT_GIM_0917	411	211	377	522	658	668	3706	1242	785	1313	29	742	94	298	211	836	936	1573	82	211	225	491	963	1363	441	360	375	356	666	591	319	517	357	324	396	346	333	519	552	411	864	989	315	531	495	436	794
CUT_GIM_0918	CUT_GIM_0918	CUT_GIM_0918	0	1	0	2	0	0	68	11	15	2	0	0	1	0	0	0	0	0	0	0	0	1	1	1	0	2	0	1	0	0	6	5	7	0	0	0	4	0	0	0	0	0	0	0	0	1	1
CUT_GIM_0919	CUT_GIM_0919	CUT_GIM_0919	1	3	2	3	0	1	44	16	27	6	0	2	0	2	0	5	1	4	1	1	0	4	3	5	1	5	2	2	0	1	4	7	12	1	0	1	0	3	0	2	1	3	4	3	0	4	2
CUT_GIM_0920	CUT_GIM_0920	CUT_GIM_0920	1	0	0	0	0	0	10	8	3	0	0	1	0	0	0	0	0	0	0	0	0	3	0	0	1	0	0	0	0	0	1	3	1	0	0	0	0	0	0	0	0	0	0	0	0	3	0
CUT_GIM_0921	CUT_GIM_0921	CUT_GIM_0921	1	0	1	0	1	0	80	14	22	2	0	1	0	1	0	2	2	1	0	0	3	1	0	0	1	0	1	0	1	0	7	6	10	0	0	0	0	2	0	1	2	1	0	0	7	1	0
CUT_GIM_0922	CUT_GIM_0922	CUT_GIM_0922	0	2	1	5	2	1	50	15	16	3	0	1	0	0	1	1	2	0	1	0	0	2	2	1	0	3	1	3	2	1	4	6	7	1	0	0	0	0	3	0	2	0	4	0	0	2	2
CUT_GIM_0923	CUT_GIM_0923	CUT_GIM_0923	5	0	5	5	9	11	68	36	61	26	0	5	0	6	4	19	7	16	0	0	0	15	13	18	5	0	5	3	9	10	6	15	28	6	0	2	0	10	10	9	6	10	0	0	0	13	11
CUT_GIM_0924	CUT_GIM_0924	CUT_GIM_0924	0	1	0	0	0	0	8	7	7	2	0	0	0	0	0	0	0	0	0	0	0	0	2	0	0	2	0	0	0	0	1	3	3	0	0	0	0	0	0	0	0	0	0	0	0	0	2
CUT_GIM_0925	CUT_GIM_0925	CUT_GIM_0925	0	0	0	0	0	0	12	7	8	0	0	0	0	0	0	0	0	0	0	0	0	2	1	0	0	0	0	0	0	0	1	3	4	0	0	0	0	0	0	0	0	0	0	0	0	2	1
CUT_GIM_0926	CUT_GIM_0926	CUT_GIM_0926	2	1	0	0	0	1	78	12	9	8	0	8	0	0	0	1	0	1	0	0	1	1	1	1	2	2	0	0	0	1	7	5	4	2	0	4	0	0	0	0	0	1	0	0	2	1	1
CUT_GIM_0927	CUT_GIM_0927	CUT_GIM_0927	0	2	6	1	6	5	184	29	17	6	0	8	0	3	2	5	1	1	1	0	1	3	4	5	0	3	6	1	6	4	16	12	8	1	0	4	0	5	5	2	1	1	4	0	2	3	3
CUT_GIM_0928	CUT_GIM_0928	CUT_GIM_0928	1	0	0	0	0	0	10	6	3	0	0	1	0	0	0	0	0	0	0	0	0	3	0	0	1	0	0	0	0	0	1	2	1	0	0	0	0	0	0	0	0	0	0	0	0	3	0
CUT_GIM_0929	CUT_GIM_0929	CUT_GIM_0929	2	5	2	3	7	4	142	41	50	32	1	12	7	3	5	8	6	15	3	4	2	8	5	14	2	9	2	2	7	4	12	17	23	8	14	6	25	5	13	4	6	9	12	10	4	7	4
CUT_GIM_0930	CUT_GIM_0930	CUT_GIM_0930	1	0	4	0	1	2	70	22	15	6	0	0	1	1	0	2	0	0	0	0	0	0	1	0	1	0	4	0	1	2	6	9	7	1	0	0	4	2	0	1	0	0	0	0	0	0	1
CUT_GIM_0931	CUT_GIM_0931	CUT_GIM_0931	0	1	2	3	0	2	60	26	24	17	0	11	1	0	1	7	0	1	1	1	3	8	6	3	0	2	2	2	0	2	5	11	11	4	0	5	4	0	3	3	0	1	4	3	7	7	5
CUT_GIM_0932	CUT_GIM_0932	CUT_GIM_0932	0	2	1	5	1	2	40	13	23	4	0	2	0	2	0	1	1	1	1	0	1	0	1	5	0	3	1	3	1	2	3	5	10	1	0	1	0	3	0	0	1	1	4	0	2	0	1
CUT_GIM_0933	CUT_GIM_0933	CUT_GIM_0933	14	4	20	13	11	24	416	118	90	75	0	23	2	11	5	28	19	32	3	3	5	11	22	43	15	7	20	9	11	21	36	49	41	18	0	11	7	19	13	14	18	20	12	8	11	10	18
CUT_GIM_0934	CUT_GIM_0934	CUT_GIM_0934	10	7	17	90	57	59	376	69	87	179	2	99	14	17	17	51	25	50	8	8	12	28	31	60	11	12	17	61	58	52	32	29	40	44	27	46	50	30	45	25	23	31	31	20	26	25	26
CUT_GIM_0935	CUT_GIM_0935	CUT_GIM_0935	4	0	6	11	4	10	166	80	68	35	2	27	3	3	2	16	9	9	0	3	2	3	6	17	4	0	6	7	4	9	14	33	31	9	27	13	11	5	5	8	8	6	0	8	4	3	5
CUT_GIM_0936	CUT_GIM_0936	CUT_GIM_0936	0	0	2	4	1	1	26	12	10	9	0	3	2	5	1	9	3	2	0	2	2	3	1	2	0	0	2	3	1	1	2	5	5	2	0	1	7	9	3	4	3	1	0	5	4	3	1
CUT_GIM_0937	CUT_GIM_0937	CUT_GIM_0937	180	16	73	44	74	114	940	86	136	524	2	59	6	45	28	177	150	217	3	27	48	22	141	289	193	27	73	30	75	101	81	36	62	129	27	28	21	78	73	87	138	136	12	68	106	20	116
CUT_GIM_0938	CUT_GIM_0938	CUT_GIM_0938	0	0	2	2	3	0	42	6	9	11	0	4	1	0	1	4	3	3	2	1	0	2	3	4	0	0	2	1	3	0	4	2	4	3	0	2	4	0	3	2	3	2	8	3	0	2	2
CUT_GIM_0939	CUT_GIM_0939	CUT_GIM_0939	0	0	1	1	0	0	24	7	7	1	0	1	0	0	0	0	0	0	0	0	0	1	0	0	0	0	1	1	0	0	2	3	3	0	0	0	0	0	0	0	0	0	0	0	0	1	0
CUT_GIM_0940	CUT_GIM_0940	CUT_GIM_0940	1	0	0	0	0	0	10	12	7	0	0	1	0	0	0	0	0	0	0	0	0	3	1	0	1	0	0	0	0	0	1	5	3	0	0	0	0	0	0	0	0	0	0	0	0	3	1
CUT_GIM_0941	CUT_GIM_0941	CUT_GIM_0941	64	39	83	128	146	134	2668	669	557	296	3	325	19	43	34	168	87	157	14	63	46	58	130	191	69	67	83	87	148	118	230	279	253	73	41	152	67	75	89	83	80	99	54	158	101	52	107
CUT_GIM_0942	CUT_GIM_0942	CUT_GIM_0942	3	5	3	7	2	4	156	29	27	11	1	5	0	0	0	2	1	0	0	1	3	0	0	2	3	9	3	5	2	4	13	12	12	3	14	2	0	0	0	1	1	0	0	3	7	0	0
CUT_GIM_0943	CUT_GIM_0943	CUT_GIM_0943	1	2	2	7	2	4	110	41	19	7	1	24	2	2	0	6	1	1	1	1	2	2	3	4	1	3	2	5	2	4	9	17	9	2	14	11	7	3	0	3	1	1	4	3	4	2	2
CUT_GIM_0944	CUT_GIM_0944	CUT_GIM_0944	1	1	0	0	3	4	68	14	15	6	0	0	2	1	0	5	2	4	1	3	1	2	1	1	1	2	0	0	3	4	6	6	7	1	0	0	7	2	0	2	2	3	4	8	2	2	1
CUT_GIM_0945	CUT_GIM_0945	CUT_GIM_0945	0	1	0	0	0	0	14	13	31	1	0	1	0	0	0	3	0	0	0	0	0	1	0	2	0	2	0	0	0	0	1	5	14	0	0	0	0	0	0	1	0	0	0	0	0	1	0
CUT_GIM_0946	CUT_GIM_0946	CUT_GIM_0946	0	0	0	1	1	0	12	6	17	2	0	0	0	0	0	1	0	0	0	0	0	1	0	0	0	0	0	1	1	0	1	2	8	0	0	0	0	0	0	0	0	0	0	0	0	1	0
CUT_GIM_0947	CUT_GIM_0947	CUT_GIM_0947	0	0	0	0	0	0	8	3	4	0	0	0	0	0	0	0	0	0	0	0	0	0	0	1	0	0	0	0	0	0	1	1	2	0	0	0	0	0	0	0	0	0	0	0	0	0	0
CUT_GIM_0948	CUT_GIM_0948	CUT_GIM_0948	20	2	14	10	34	45	116	28	23	102	0	17	8	7	9	111	36	66	2	14	16	26	50	87	21	3	14	7	34	40	10	12	10	25	0	8	28	12	24	55	33	41	8	35	35	23	41
CUT_GIM_0949	CUT_GIM_0949	CUT_GIM_0949	4	2	4	5	1	2	128	31	36	7	0	6	0	0	1	4	0	2	0	1	1	3	0	2	4	3	4	3	1	2	11	13	16	2	0	3	0	0	3	2	0	1	0	3	2	3	0
CUT_GIM_0950	CUT_GIM_0950	CUT_GIM_0950	44	5	19	13	12	17	346	32	30	293	0	69	0	3	2	33	20	32	2	4	9	6	20	39	47	9	19	9	12	15	30	13	14	72	0	32	0	5	5	16	18	20	8	10	20	5	16
CUT_GIM_0951	CUT_GIM_0951	CUT_GIM_0951	52	21	46	41	37	49	614	147	156	330	1	58	5	22	13	80	48	54	7	18	22	51	44	102	56	36	46	28	37	43	53	61	71	81	14	27	18	38	34	39	44	34	27	45	48	45	36
CUT_GIM_0952	CUT_GIM_0952	CUT_GIM_0952	29	20	25	116	130	114	750	183	182	117	0	179	16	20	12	86	37	44	15	25	23	24	54	76	31	34	25	79	131	101	65	76	83	29	0	84	57	35	31	42	34	28	58	63	51	21	45
CUT_GIM_0953	CUT_GIM_0953	CUT_GIM_0953	1	0	2	4	0	3	58	13	13	8	0	3	1	1	3	7	4	10	0	1	3	5	4	9	1	0	2	3	0	3	5	5	6	2	0	1	4	2	8	3	4	6	0	3	7	4	3
CUT_GIM_0954	CUT_GIM_0954	CUT_GIM_0954	10	4	10	38	39	27	330	81	59	63	1	66	6	9	7	31	17	25	4	4	13	20	21	49	11	7	10	26	39	24	28	34	27	16	14	31	21	16	18	15	16	16	15	10	29	18	17
CUT_GIM_0955	CUT_GIM_0955	CUT_GIM_0955	1	0	0	1	0	0	18	17	32	1	0	1	0	0	0	2	0	1	0	0	0	1	0	0	1	0	0	1	0	0	2	7	15	0	0	0	0	0	0	1	0	1	0	0	0	1	0
CUT_GIM_0956	CUT_GIM_0956	CUT_GIM_0956	3	3	2	29	16	17	190	43	30	32	0	12	4	6	3	15	5	10	2	2	1	3	8	9	3	5	2	20	16	15	16	18	14	8	0	6	14	10	8	7	5	6	8	5	2	3	7
CUT_GIM_0957	CUT_GIM_0957	CUT_GIM_0957	45	34	64	114	79	104	1616	492	358	194	3	91	20	47	26	83	57	89	5	23	32	30	75	113	48	58	64	78	80	92	139	205	163	48	41	42	71	82	68	41	53	56	19	58	70	27	62
CUT_GIM_0958	CUT_GIM_0958	CUT_GIM_0958	0	1	0	1	0	0	6	5	16	0	0	0	0	0	0	1	1	1	0	0	0	0	0	0	0	2	0	1	0	0	1	2	7	0	0	0	0	0	0	0	1	1	0	0	0	0	0
CUT_GIM_0959	CUT_GIM_0959	CUT_GIM_0959	433	259	442	677	751	738	3984	1383	870	1361	36	802	113	330	229	906	995	1660	93	234	243	545	1038	1452	464	442	440	461	760	652	343	576	395	335	492	374	401	574	600	445	918	1043	357	588	534	484	856
CUT_GIM_0960	CUT_GIM_0960	CUT_GIM_0960	1	2	2	7	2	5	128	45	26	7	1	24	2	2	1	8	1	2	1	1	2	2	3	4	1	3	2	5	2	4	11	19	12	2	14	11	7	3	3	4	1	1	4	3	4	2	2
CUT_GIM_0961	CUT_GIM_0961	CUT_GIM_0961	1	0	4	11	11	3	44	16	13	19	1	14	1	6	3	8	3	4	0	2	1	5	5	7	1	0	4	7	11	3	4	7	6	5	14	7	4	10	8	4	3	3	0	5	2	4	4
CUT_GIM_0962	CUT_GIM_0962	CUT_GIM_0962	31	16	37	39	35	59	1198	142	189	121	1	128	11	16	16	36	33	43	5	15	12	26	43	63	33	27	37	27	35	52	103	59	86	30	14	60	39	28	42	18	30	27	19	38	26	23	35
CUT_GIM_0963	CUT_GIM_0963	CUT_GIM_0963	2	1	2	4	1	2	134	22	23	17	0	11	1	1	0	9	7	3	0	1	0	0	2	2	2	2	2	3	1	2	12	9	10	4	0	5	4	2	0	4	6	2	0	3	0	0	2
CUT_GIM_0964	CUT_GIM_0964	CUT_GIM_0964	15	5	9	0	3	9	80	20	18	57	1	28	2	4	0	8	7	12	0	2	4	7	11	29	16	9	9	0	3	8	7	8	8	14	14	13	7	7	0	4	6	8	0	5	9	6	9
CUT_GIM_0965	CUT_GIM_0965	CUT_GIM_0965	2	1	1	1	0	0	88	18	10	2	0	2	0	0	0	2	0	0	0	0	0	1	0	2	2	2	1	1	0	0	8	7	5	0	0	1	0	0	0	1	0	0	0	0	0	1	0
CUT_GIM_0966	CUT_GIM_0966	CUT_GIM_0966	0	0	2	4	0	2	48	41	53	2	0	1	0	1	0	4	3	1	0	0	1	1	1	1	0	0	2	3	0	2	4	17	24	0	0	0	0	2	0	2	3	1	0	0	2	1	1
CUT_GIM_0967	CUT_GIM_0967	CUT_GIM_0967	4	3	6	4	2	2	202	47	35	11	0	8	2	0	1	9	3	6	1	4	3	1	8	7	4	5	6	3	2	2	17	20	16	3	0	4	7	0	3	4	3	4	4	10	7	1	7
CUT_GIM_0968	CUT_GIM_0968	CUT_GIM_0968	2	3	6	8	3	0	130	36	36	11	0	6	0	0	0	7	1	1	2	0	0	0	0	5	2	5	6	5	3	0	11	15	16	3	0	3	0	0	0	3	1	1	8	0	0	0	0
CUT_GIM_0969	CUT_GIM_0969	CUT_GIM_0969	5	1	2	13	5	11	56	11	8	10	0	10	0	2	0	9	3	6	0	0	3	1	6	4	5	2	2	9	5	10	5	5	4	2	0	5	0	3	0	4	3	4	0	0	7	1	5
CUT_GIM_0970	CUT_GIM_0970	CUT_GIM_0970	8	4	9	31	38	14	236	78	65	35	3	29	4	7	5	19	13	22	5	4	3	5	14	25	9	7	9	21	38	12	20	32	30	9	41	14	14	12	13	9	12	14	19	10	7	4	12
CUT_GIM_0971	CUT_GIM_0971	CUT_GIM_0971	0	0	2	1	1	0	4	5	3	3	0	2	0	0	0	3	0	0	0	0	0	1	4	2	0	0	2	1	1	0	0	2	1	1	0	1	0	0	0	1	0	0	0	0	0	1	3
CUT_GIM_0972	CUT_GIM_0972	CUT_GIM_0972	3	1	1	6	2	10	48	36	25	17	0	10	1	4	7	17	3	8	3	2	3	3	6	11	3	2	1	4	2	9	4	15	11	4	0	5	4	7	18	8	3	5	12	5	7	3	5
CUT_GIM_0973	CUT_GIM_0973	CUT_GIM_0973	0	0	0	1	1	0	40	7	10	1	0	1	0	0	0	2	2	2	0	1	0	0	0	1	0	0	0	1	1	0	3	3	5	0	0	0	0	0	0	1	2	1	0	3	0	0	0
CUT_GIM_0974	CUT_GIM_0974	CUT_GIM_0974	39	21	55	65	51	52	484	287	208	117	1	34	7	43	23	49	79	102	7	26	28	33	65	104	42	36	55	44	52	46	42	120	95	29	14	16	25	75	60	24	73	64	27	65	62	29	54
CUT_GIM_0975	CUT_GIM_0975	CUT_GIM_0975	5	2	2	4	0	1	108	36	21	5	1	4	2	1	2	4	1	4	0	2	0	3	2	2	5	3	2	3	0	1	9	15	10	1	14	2	7	2	5	2	1	3	0	5	0	3	2
CUT_GIM_0976	CUT_GIM_0976	CUT_GIM_0976	5	2	1	10	12	11	98	36	39	18	0	5	0	2	0	13	5	5	1	1	1	3	3	7	5	3	1	7	12	10	8	15	18	4	0	2	0	3	0	6	5	3	4	3	2	3	2
CUT_GIM_0977	CUT_GIM_0977	CUT_GIM_0977	4	3	6	4	2	2	206	48	35	11	0	8	2	0	1	9	3	6	1	4	3	1	8	8	4	5	6	3	2	2	18	20	16	3	0	4	7	0	3	4	3	4	4	10	7	1	7
CUT_GIM_0978	CUT_GIM_0978	CUT_GIM_0978	1	2	1	1	0	1	14	22	31	2	0	1	1	0	2	7	1	2	0	1	0	0	1	5	1	3	1	1	0	1	1	9	14	0	0	0	4	0	5	3	1	1	0	3	0	0	1
CUT_GIM_0979	CUT_GIM_0979	CUT_GIM_0979	6	3	9	33	25	22	222	108	141	79	0	24	4	13	4	30	19	19	5	5	6	15	23	30	6	5	9	22	25	19	19	45	64	19	0	11	14	23	10	15	18	12	19	13	13	13	19
CUT_GIM_0980	CUT_GIM_0980	CUT_GIM_0980	0	1	1	2	1	2	16	14	10	2	0	1	0	0	1	4	3	0	0	1	0	1	2	0	0	2	1	1	1	2	1	6	5	0	0	0	0	0	3	2	3	0	0	3	0	1	2
CUT_GIM_0981	CUT_GIM_0981	CUT_GIM_0981	0	0	0	0	0	0	4	3	2	2	0	2	0	0	3	4	0	4	2	0	0	0	2	2	0	0	0	0	0	0	0	1	1	0	0	1	0	0	8	2	0	3	8	0	0	0	2
CUT_GIM_0982	CUT_GIM_0982	CUT_GIM_0982	5	2	4	2	0	5	500	24	21	19	0	26	0	3	0	5	2	1	0	1	1	8	3	5	5	3	4	1	0	4	43	10	10	5	0	12	0	5	0	2	2	1	0	3	2	7	2
CUT_GIM_0983	CUT_GIM_0983	CUT_GIM_0983	0	3	3	7	1	3	38	16	11	10	0	3	3	2	1	4	0	2	2	2	1	0	4	1	0	5	3	5	1	3	3	7	5	2	0	1	11	3	3	2	0	1	8	5	2	0	3
CUT_GIM_0984	CUT_GIM_0984	CUT_GIM_0984	75	11	51	23	27	36	1208	62	73	173	0	30	14	16	8	112	55	65	3	23	15	19	65	125	80	19	51	16	27	32	104	26	33	43	0	14	50	28	21	55	51	41	12	58	33	17	54
CUT_GIM_0985	CUT_GIM_0985	CUT_GIM_0985	7	5	6	16	11	12	170	55	39	33	2	13	2	6	2	13	8	4	2	4	0	9	11	11	8	9	6	11	11	11	15	23	18	8	27	6	7	10	5	6	7	3	8	10	0	8	9
CUT_GIM_0986	CUT_GIM_0986	CUT_GIM_0986	95	45	99	193	132	133	2126	375	345	340	4	176	15	40	31	138	61	101	11	28	25	64	76	105	102	77	98	132	134	118	183	156	157	84	55	82	53	70	81	68	56	63	42	70	55	57	63
CUT_GIM_0987	CUT_GIM_0987	CUT_GIM_0987	79	13	76	18	20	16	2146	131	130	406	6	38	5	14	18	90	31	72	7	16	14	38	103	103	85	22	76	12	20	14	185	55	59	100	82	18	18	24	47	44	29	45	27	40	31	34	85
CUT_GIM_0988	CUT_GIM_0988	CUT_GIM_0988	0	0	0	1	1	0	0	6	4	1	0	1	1	0	0	2	0	0	0	1	0	0	0	0	0	0	0	1	1	0	0	2	2	0	0	0	4	0	0	1	0	0	0	3	0	0	0
CUT_GIM_0989	CUT_GIM_0989	CUT_GIM_0989	154	58	120	28	75	59	1614	392	343	455	5	348	8	51	14	177	209	312	8	35	33	83	275	359	165	99	119	19	76	52	139	163	156	112	68	162	28	89	37	87	193	196	31	88	73	74	227
CUT_GIM_0990	CUT_GIM_0990	CUT_GIM_0990	36	5	9	75	42	54	308	74	52	135	0	27	10	19	13	78	27	24	8	10	9	42	24	41	39	9	9	51	42	48	27	31	24	33	0	13	35	33	34	38	25	15	31	25	20	37	20
CUT_GIM_0991	CUT_GIM_0991	CUT_GIM_0991	3	0	2	0	0	0	28	3	6	5	0	4	0	0	0	3	1	1	0	1	0	1	1	3	3	0	2	0	0	0	2	1	3	1	0	2	0	0	0	1	1	1	0	3	0	1	1
CUT_GIM_0992	CUT_GIM_0992	CUT_GIM_0992	147	83	115	164	227	190	932	354	291	406	7	206	20	57	42	165	146	240	9	69	51	64	189	248	158	142	114	112	230	168	80	147	132	100	96	96	71	99	110	81	135	151	35	174	112	57	156
CUT_GIM_0993	CUT_GIM_0993	CUT_GIM_0993	1	0	1	3	5	4	22	12	12	6	1	1	1	0	0	1	2	0	2	1	0	1	1	0	1	0	1	2	5	4	2	5	5	1	14	0	4	0	0	0	2	0	8	3	0	1	1
CUT_GIM_0994	CUT_GIM_0994	CUT_GIM_0994	0	1	0	1	0	0	16	17	5	6	0	3	1	0	1	4	0	1	0	0	0	0	1	2	0	2	0	1	0	0	1	7	2	1	0	1	4	0	3	2	0	1	0	0	0	0	1
CUT_GIM_0995	CUT_GIM_0995	CUT_GIM_0995	272	170	276	405	389	379	2668	830	814	1062	19	344	76	174	121	626	641	908	94	122	131	443	638	806	292	290	275	276	393	335	230	346	370	262	259	160	270	303	317	308	591	571	361	307	288	394	526
CUT_GIM_0996	CUT_GIM_0996	CUT_GIM_0996	181	44	107	111	64	67	1412	443	469	528	10	268	18	41	25	137	61	187	18	24	30	75	111	146	194	75	106	76	65	59	122	184	213	130	137	125	64	71	65	67	56	118	69	60	66	67	92
CUT_GIM_0997	CUT_GIM_0997	CUT_GIM_0997	0	0	0	1	0	1	26	9	13	6	0	2	2	0	2	2	1	1	0	1	1	0	1	2	0	0	0	1	0	1	2	4	6	1	0	1	7	0	5	1	1	1	0	3	2	0	1
CUT_GIM_0998	CUT_GIM_0998	CUT_GIM_0998	0	2	0	1	1	0	24	4	7	5	0	0	2	1	0	3	0	1	1	0	0	1	0	2	0	3	0	1	1	0	2	2	3	1	0	0	7	2	0	1	0	1	4	0	0	1	0
CUT_GIM_0999	CUT_GIM_0999	CUT_GIM_0999	0	0	0	1	0	0	18	9	14	2	0	2	0	1	1	3	2	0	1	1	0	1	3	3	0	0	0	1	0	0	2	4	6	0	0	1	0	2	3	1	2	0	4	3	0	1	2
CUT_GIM_1000	CUT_GIM_1000	CUT_GIM_1000	1	0	1	1	0	1	12	2	3	1	0	1	0	0	0	4	2	3	0	0	1	1	2	0	1	0	1	1	0	1	1	1	1	0	0	0	0	0	0	2	2	2	0	0	2	1	2
CUT_GIM_1001	CUT_GIM_1001	CUT_GIM_1001	19	10	9	4	8	12	208	25	53	74	0	34	2	5	4	29	11	23	3	5	10	11	13	30	20	17	9	3	8	11	18	10	24	18	0	16	7	9	10	14	10	14	12	13	22	10	11
CUT_GIM_1002	CUT_GIM_1002	CUT_GIM_1002	1	2	0	1	0	0	4	3	0	1	0	0	2	1	0	1	0	0	0	1	0	1	0	1	1	3	0	1	0	0	0	1	0	0	0	0	7	2	0	0	0	0	0	3	0	1	0
CUT_GIM_1003	CUT_GIM_1003	CUT_GIM_1003	22	12	12	39	14	20	506	172	180	62	3	52	4	4	5	27	20	18	2	10	7	19	19	20	24	21	12	27	14	18	44	72	82	15	41	24	14	7	13	13	18	11	8	25	15	17	16
CUT_GIM_1004	CUT_GIM_1004	CUT_GIM_1004	0	0	1	0	1	0	12	15	8	1	0	0	0	0	0	0	0	0	0	0	0	2	1	0	0	0	1	0	1	0	1	6	4	0	0	0	0	0	0	0	0	0	0	0	0	2	1
CUT_GIM_1005	CUT_GIM_1005	CUT_GIM_1005	31	11	16	27	53	61	576	140	98	120	1	65	7	20	19	54	96	143	4	24	20	35	92	133	33	19	16	18	54	54	50	58	45	30	14	30	25	35	50	27	89	90	15	60	44	31	76
CUT_GIM_1006	CUT_GIM_1006	CUT_GIM_1006	0	0	3	0	0	0	28	15	17	2	0	1	0	0	0	4	0	1	0	0	0	1	1	0	0	0	3	0	0	0	2	6	8	0	0	0	0	0	0	2	0	1	0	0	0	1	1
CUT_GIM_1007	CUT_GIM_1007	CUT_GIM_1007	1	0	0	6	0	2	14	11	9	3	1	5	0	0	1	2	2	1	0	0	1	1	0	4	1	0	0	4	0	2	1	5	4	1	14	2	0	0	3	1	2	1	0	0	2	1	0
CUT_GIM_1008	CUT_GIM_1008	CUT_GIM_1008	0	0	1	3	0	1	50	13	16	3	0	6	0	0	0	2	0	0	1	0	1	0	1	0	0	0	1	2	0	1	4	5	7	1	0	3	0	0	0	1	0	0	4	0	2	0	1
CUT_GIM_1009	CUT_GIM_1009	CUT_GIM_1009	1	2	3	13	15	7	184	38	33	17	2	18	1	1	2	3	1	3	0	3	3	5	8	7	1	3	3	9	15	6	16	16	15	4	27	8	4	2	5	1	1	2	0	8	7	4	7
CUT_GIM_1010	CUT_GIM_1010	CUT_GIM_1010	22	12	12	39	13	20	504	171	177	62	3	52	4	4	5	27	20	18	2	10	7	19	19	20	24	21	12	27	13	18	43	71	80	15	41	24	14	7	13	13	18	11	8	25	15	17	16
CUT_GIM_1011	CUT_GIM_1011	CUT_GIM_1011	0	0	0	1	0	1	12	8	9	2	0	0	2	0	2	2	1	0	0	1	1	0	0	2	0	0	0	1	0	1	1	3	4	0	0	0	7	0	5	1	1	0	0	3	2	0	0
CUT_GIM_1012	CUT_GIM_1012	CUT_GIM_1012	0	0	1	2	0	1	10	7	3	0	0	0	0	0	0	0	0	0	0	1	0	1	0	1	0	0	1	1	0	1	1	3	1	0	0	0	0	0	0	0	0	0	0	3	0	1	0
CUT_GIM_1013	CUT_GIM_1013	CUT_GIM_1013	22	11	17	26	16	22	370	56	53	87	2	26	7	6	8	37	16	20	4	11	11	23	24	44	24	19	17	18	16	19	32	23	24	21	27	12	25	10	21	18	15	13	15	28	24	20	20
CUT_GIM_1014	CUT_GIM_1014	CUT_GIM_1014	2	4	3	2	0	0	64	50	70	2	0	0	1	2	0	6	3	1	0	0	1	2	6	3	2	7	3	1	0	0	6	21	32	0	0	0	4	3	0	3	3	1	0	0	2	2	5
CUT_GIM_1015	CUT_GIM_1015	CUT_GIM_1015	0	0	0	0	0	0	6	0	2	2	0	0	0	0	0	0	0	0	0	0	0	0	0	0	0	0	0	0	0	0	1	0	1	0	0	0	0	0	0	0	0	0	0	0	0	0	0
CUT_GIM_1016	CUT_GIM_1016	CUT_GIM_1016	3	1	5	17	9	15	198	40	41	35	1	13	3	3	3	17	4	10	3	0	3	9	11	17	3	2	5	12	9	13	17	17	19	9	14	6	11	5	8	8	4	6	12	0	7	8	9
CUT_GIM_1017	CUT_GIM_1017	CUT_GIM_1017	1	1	0	4	6	11	56	29	19	0	0	10	3	1	0	6	0	1	0	1	1	1	1	4	1	2	0	3	6	10	5	12	9	0	0	5	11	2	0	3	0	1	0	3	2	1	1
CUT_GIM_1018	CUT_GIM_1018	CUT_GIM_1018	24	12	14	15	7	15	602	71	76	94	0	149	4	10	4	47	26	24	4	6	3	18	25	33	26	21	14	10	7	13	52	30	35	23	0	70	14	17	10	23	24	15	15	15	7	16	21
CUT_GIM_1019	CUT_GIM_1019	CUT_GIM_1019	11	7	16	29	26	37	344	113	74	64	1	92	10	20	10	47	12	24	6	16	9	26	24	33	12	12	16	20	26	33	30	47	34	16	14	43	35	35	26	23	11	15	23	40	20	23	20
CUT_GIM_1020	CUT_GIM_1020	CUT_GIM_1020	2	1	5	5	2	1	114	52	62	7	0	3	0	0	1	4	7	4	0	0	2	4	2	7	2	2	5	3	2	1	10	22	28	2	0	1	0	0	3	2	6	3	0	0	4	4	2
CUT_GIM_1021	CUT_GIM_1021	CUT_GIM_1021	0	0	0	1	0	1	10	7	9	2	0	0	2	0	2	2	1	0	0	1	1	0	0	2	0	0	0	1	0	1	1	3	4	0	0	0	7	0	5	1	1	0	0	3	2	0	0
CUT_GIM_1022	CUT_GIM_1022	CUT_GIM_1022	174	40	264	29	68	73	2306	340	345	428	6	415	20	34	41	368	124	183	5	45	46	50	308	335	187	68	263	20	69	65	199	142	157	105	82	194	71	59	107	181	114	115	19	113	101	44	254
CUT_GIM_1023	CUT_GIM_1023	CUT_GIM_1023	0	0	0	0	0	0	4	3	2	0	0	0	0	0	0	0	0	0	0	0	0	0	0	0	0	0	0	0	0	0	0	1	1	0	0	0	0	0	0	0	0	0	0	0	0	0	0
CUT_GIM_1024	CUT_GIM_1024	CUT_GIM_1024	7	1	2	3	3	2	1168	284	174	14	0	8	1	2	1	12	1	5	1	2	1	3	2	3	8	2	2	2	3	2	101	118	79	3	0	4	4	3	3	6	1	3	4	5	2	3	2
CUT_GIM_1025	CUT_GIM_1025	CUT_GIM_1025	121	28	86	72	106	121	670	90	81	559	3	195	13	48	24	280	147	241	10	33	51	119	190	319	130	48	86	49	107	107	58	37	37	138	41	91	46	84	63	138	136	151	38	83	112	106	157
CUT_GIM_1026	CUT_GIM_1026	CUT_GIM_1026	197	52	179	115	339	389	2928	339	234	778	1	338	54	200	145	798	677	1128	45	188	185	346	925	1218	211	89	178	78	343	344	252	141	106	192	14	158	192	348	380	392	625	709	173	473	407	307	763
CUT_GIM_1027	CUT_GIM_1027	CUT_GIM_1027	3	2	1	11	9	14	202	34	25	39	0	29	3	7	3	19	9	13	4	2	3	11	7	11	3	3	1	7	9	12	17	14	11	10	0	14	11	12	8	9	8	8	15	5	7	10	6
CUT_GIM_1028	CUT_GIM_1028	CUT_GIM_1028	1	0	0	0	0	0	44	20	28	1	0	2	0	0	0	2	0	2	0	0	1	0	2	1	1	0	0	0	0	0	4	8	13	0	0	1	0	0	0	1	0	1	0	0	2	0	2
CUT_GIM_1029	CUT_GIM_1029	CUT_GIM_1029	0	0	0	0	0	1	2	3	6	0	0	0	1	0	0	0	1	0	0	0	0	0	0	0	0	0	0	0	0	1	0	1	3	0	0	0	4	0	0	0	1	0	0	0	0	0	0
CUT_GIM_1030	CUT_GIM_1030	CUT_GIM_1030	186	40	144	86	300	337	2604	274	221	749	1	296	40	168	128	704	604	1022	36	165	165	286	831	1105	199	68	143	59	303	298	224	114	100	185	14	138	142	292	335	346	557	642	138	415	363	254	685
CUT_GIM_1031	CUT_GIM_1031	CUT_GIM_1031	5	4	4	13	16	25	234	44	49	23	0	12	3	11	7	34	4	12	0	3	9	12	13	19	5	7	4	9	16	22	20	18	22	6	0	6	11	19	18	17	4	8	0	8	20	11	11
CUT_GIM_1032	CUT_GIM_1032	CUT_GIM_1032	4	2	4	4	4	2	238	38	38	11	2	13	1	2	0	9	1	4	0	2	1	3	3	2	4	3	4	3	4	2	21	16	17	3	27	6	4	3	0	4	1	3	0	5	2	3	2
CUT_GIM_1033	CUT_GIM_1033	CUT_GIM_1033	0	0	1	5	1	0	60	37	43	5	0	1	1	2	1	4	1	2	0	1	1	0	3	5	0	0	1	3	1	0	5	15	20	1	0	0	4	3	3	2	1	1	0	3	2	0	2
CUT_GIM_1034	CUT_GIM_1034	CUT_GIM_1034	2	1	1	1	0	1	54	12	14	7	0	6	1	3	1	3	3	4	0	0	2	3	5	9	2	2	1	1	0	1	5	5	6	2	0	3	4	5	3	1	3	3	0	0	4	3	4
CUT_GIM_1035	CUT_GIM_1035	CUT_GIM_1035	0	0	0	0	0	0	4	3	2	0	0	0	0	0	0	0	0	0	0	0	0	0	0	0	0	0	0	0	0	0	0	1	1	0	0	0	0	0	0	0	0	0	0	0	0	0	0
CUT_GIM_1036	CUT_GIM_1036	CUT_GIM_1036	6	1	6	8	6	10	232	34	43	26	1	8	0	6	5	5	6	6	3	6	2	5	9	10	6	2	6	5	6	9	20	14	20	6	14	4	0	10	13	2	6	4	12	15	4	4	7
CUT_GIM_1037	CUT_GIM_1037	CUT_GIM_1037	2	3	4	4	6	3	108	41	32	14	0	9	0	3	0	7	3	11	2	2	2	5	5	6	2	5	4	3	6	3	9	17	15	3	0	4	0	5	0	3	3	7	8	5	4	4	4
CUT_GIM_1038	CUT_GIM_1038	CUT_GIM_1038	0	0	0	10	9	9	22	2	4	19	1	13	1	0	2	6	4	6	2	1	3	2	0	5	0	0	0	7	9	8	2	1	2	5	14	6	4	0	5	3	4	4	8	3	7	2	0
CUT_GIM_1039	CUT_GIM_1039	CUT_GIM_1039	20	9	16	24	16	31	324	43	54	76	2	43	7	14	7	46	20	34	5	7	15	21	30	45	21	15	16	16	16	27	28	18	25	19	27	20	25	24	18	23	18	21	19	18	33	19	25
CUT_GIM_1040	CUT_GIM_1040	CUT_GIM_1040	1	2	2	0	2	0	64	14	27	2	0	0	0	0	0	0	0	0	1	0	0	0	0	0	1	3	2	0	2	0	6	6	12	0	0	0	0	0	0	0	0	0	4	0	0	0	0
CUT_GIM_1041	CUT_GIM_1041	CUT_GIM_1041	1	1	1	0	2	3	24	17	15	1	0	3	0	1	0	4	0	2	0	0	0	0	2	2	1	2	1	0	2	3	2	7	7	0	0	1	0	2	0	2	0	1	0	0	0	0	2
CUT_GIM_1042	CUT_GIM_1042	CUT_GIM_1042	2	3	5	2	1	3	48	23	24	27	0	7	2	1	4	18	1	6	0	4	4	7	7	8	2	5	5	1	1	3	4	10	11	7	0	3	7	2	10	9	1	4	0	10	9	6	6
CUT_GIM_1043	CUT_GIM_1043	CUT_GIM_1043	0	0	0	1	0	1	12	0	0	2	1	0	0	1	1	0	0	1	0	0	0	0	2	1	0	0	0	1	0	1	1	0	0	0	14	0	0	2	3	0	0	1	0	0	0	0	2
CUT_GIM_1044	CUT_GIM_1044	CUT_GIM_1044	4	7	8	5	1	0	324	172	203	8	0	6	0	1	0	5	1	2	0	2	2	4	4	12	4	12	8	3	1	0	28	72	92	2	0	3	0	2	0	2	1	1	0	5	4	4	3
CUT_GIM_1045	CUT_GIM_1045	CUT_GIM_1045	18	4	12	55	42	41	524	78	75	65	0	37	6	9	4	52	17	27	4	3	12	20	12	32	19	7	12	37	42	36	45	32	34	16	0	17	21	16	10	26	16	17	15	8	26	18	10
CUT_GIM_1046	CUT_GIM_1046	CUT_GIM_1046	0	0	1	2	0	0	34	17	28	6	0	1	0	0	1	0	1	1	0	0	1	0	0	1	0	0	1	1	0	0	3	7	13	1	0	0	0	0	3	0	1	1	0	0	2	0	0
CUT_GIM_1047	CUT_GIM_1047	CUT_GIM_1047	3733	940	2379	1109	2158	2839	10328	1201	1158	6783	54	3354	237	873	587	4685	3443	5399	152	647	809	1432	3837	5897	4004	1606	2366	756	2183	2510	890	500	526	1672	737	1565	841	1520	1537	2303	3177	3394	584	1627	1779	1272	3164
CUT_GIM_1048	CUT_GIM_1048	CUT_GIM_1048	32	33	76	280	162	157	2370	448	280	293	4	143	35	79	46	154	55	95	31	48	65	93	75	136	34	56	76	191	164	139	204	187	127	72	55	67	124	138	120	76	51	60	119	121	143	83	62
CUT_GIM_1049	CUT_GIM_1049	CUT_GIM_1049	4	0	4	6	5	4	64	14	13	35	1	15	0	2	2	11	7	8	2	2	1	4	7	15	4	0	4	4	5	4	6	6	6	9	14	7	0	3	5	5	6	5	8	5	2	4	6
CUT_GIM_1050	CUT_GIM_1050	CUT_GIM_1050	0	1	0	1	0	0	12	8	9	1	0	0	0	0	0	0	0	0	0	1	0	0	2	1	0	2	0	1	0	0	1	3	4	0	0	0	0	0	0	0	0	0	0	3	0	0	2
CUT_GIM_1051	CUT_GIM_1051	CUT_GIM_1051	21	9	19	38	26	37	1482	267	255	125	1	97	7	19	13	41	29	57	2	15	16	9	58	70	23	15	19	26	26	33	128	111	116	31	14	45	25	33	34	20	27	36	8	38	35	8	48
CUT_GIM_1052	CUT_GIM_1052	CUT_GIM_1052	3	1	2	1	1	4	28	15	15	11	0	10	0	1	1	3	1	4	0	3	1	1	3	5	3	2	2	1	1	4	2	6	7	3	0	5	0	2	3	1	1	3	0	8	2	1	2
CUT_GIM_1053	CUT_GIM_1053	CUT_GIM_1053	4	3	6	0	0	0	108	13	29	8	0	1	1	0	0	1	0	1	1	0	0	0	0	4	4	5	6	0	0	0	9	5	13	2	0	0	4	0	0	0	0	1	4	0	0	0	0
CUT_GIM_1054	CUT_GIM_1054	CUT_GIM_1054	0	0	2	3	0	1	24	7	11	3	1	2	0	2	2	4	2	3	0	0	0	2	1	4	0	0	2	2	0	1	2	3	5	1	14	1	0	3	5	2	2	2	0	0	0	2	1
CUT_GIM_1055	CUT_GIM_1055	CUT_GIM_1055	1	0	2	1	0	0	20	5	7	3	0	3	0	1	0	1	0	1	1	0	2	3	1	2	1	0	2	1	0	0	2	2	3	1	0	1	0	2	0	0	0	1	4	0	4	3	1
CUT_GIM_1056	CUT_GIM_1056	CUT_GIM_1056	0	0	1	0	0	0	26	14	21	3	0	3	0	0	2	4	0	0	1	2	0	1	1	1	0	0	1	0	0	0	2	6	10	1	0	1	0	0	5	2	0	0	4	5	0	1	1
CUT_GIM_1057	CUT_GIM_1057	CUT_GIM_1057	0	0	0	6	1	1	50	18	21	12	0	4	0	2	1	3	1	1	1	2	0	3	1	2	0	0	0	4	1	1	4	7	10	3	0	2	0	3	3	1	1	1	4	5	0	3	1
CUT_GIM_1058	CUT_GIM_1058	CUT_GIM_1058	1	3	4	2	0	1	94	70	74	9	0	12	0	1	0	2	2	4	1	0	0	2	2	8	1	5	4	1	0	1	8	29	34	2	0	6	0	2	0	1	2	3	4	0	0	2	2
CUT_GIM_1059	CUT_GIM_1059	CUT_GIM_1059	189	103	225	119	124	148	894	195	214	45	0	41	9	20	20	108	102	166	2	17	14	28	140	159	203	176	224	81	125	131	77	81	97	11	0	19	32	35	52	53	94	104	8	43	31	25	115
CUT_GIM_1060	CUT_GIM_1060	CUT_GIM_1060	6	1	3	35	47	30	160	43	37	39	2	11	3	6	5	24	16	14	2	7	4	10	12	21	6	2	3	24	48	27	14	18	17	10	27	5	11	10	13	12	15	9	8	18	9	9	10
CUT_GIM_1061	CUT_GIM_1061	CUT_GIM_1061	1	3	4	2	0	1	92	70	74	8	0	7	0	1	0	2	2	4	1	0	0	2	2	7	1	5	4	1	0	1	8	29	34	2	0	3	0	2	0	1	2	3	4	0	0	2	2
CUT_GIM_1062	CUT_GIM_1062	CUT_GIM_1062	0	0	0	1	0	1	18	7	3	3	0	0	0	0	0	1	1	1	0	0	0	0	0	0	0	0	0	1	0	1	2	3	1	1	0	0	0	0	0	0	1	1	0	0	0	0	0
CUT_GIM_1063	CUT_GIM_1063	CUT_GIM_1063	194	80	158	314	339	332	1982	371	411	704	2	249	57	96	70	480	304	477	39	66	94	271	346	532	208	137	157	214	343	294	171	154	187	173	27	116	202	167	183	236	281	300	150	166	207	241	285
CUT_GIM_1064	CUT_GIM_1064	CUT_GIM_1064	0	1	0	1	0	1	26	13	13	2	0	0	0	0	0	2	0	0	0	0	1	0	0	0	0	2	0	1	0	1	2	5	6	0	0	0	0	0	0	1	0	0	0	0	2	0	0
CUT_GIM_1065	CUT_GIM_1065	CUT_GIM_1065	0	1	0	0	0	0	26	33	36	0	0	0	0	0	0	0	0	0	1	0	0	2	0	2	0	2	0	0	0	0	2	14	16	0	0	0	0	0	0	0	0	0	4	0	0	2	0
CUT_GIM_1066	CUT_GIM_1066	CUT_GIM_1066	0	0	1	2	0	1	102	19	13	4	0	4	0	1	1	1	2	0	0	0	1	2	0	1	0	0	1	1	0	1	9	8	6	1	0	2	0	2	3	0	2	0	0	0	2	2	0
CUT_GIM_1067	CUT_GIM_1067	CUT_GIM_1067	2	2	2	4	1	2	194	32	33	11	0	10	1	2	1	5	1	0	2	1	3	7	0	7	2	3	2	3	1	2	17	13	15	3	0	5	4	3	3	2	1	0	8	3	7	6	0
CUT_GIM_1068	CUT_GIM_1068	CUT_GIM_1068	1	2	1	4	5	3	24	25	28	0	0	4	1	0	1	2	1	2	1	0	2	1	0	1	1	3	1	3	5	3	2	10	13	0	0	2	4	0	3	1	1	1	4	0	4	1	0
CUT_GIM_1069	CUT_GIM_1069	CUT_GIM_1069	3	13	18	12	9	6	496	125	117	65	0	25	6	23	9	24	12	24	7	13	12	19	10	24	3	22	18	8	9	5	43	52	53	16	0	12	21	40	24	12	11	15	27	33	26	17	8
CUT_GIM_1070	CUT_GIM_1070	CUT_GIM_1070	1	0	0	1	2	0	40	9	20	0	0	3	0	0	1	0	3	1	0	0	0	0	3	2	1	0	0	1	2	0	3	4	9	0	0	1	0	0	3	0	3	1	0	0	0	0	2
CUT_GIM_1071	CUT_GIM_1071	CUT_GIM_1071	0	0	0	1	0	2	16	10	5	1	0	0	0	2	0	1	1	1	1	0	0	3	1	2	0	0	0	1	0	2	1	4	2	0	0	0	0	3	0	0	1	1	4	0	0	3	1
CUT_GIM_1072	CUT_GIM_1072	CUT_GIM_1072	4	2	6	8	12	21	160	31	25	22	0	11	0	4	5	16	11	9	1	1	5	6	9	15	4	3	6	5	12	19	14	13	11	5	0	5	0	7	13	8	10	6	4	3	11	5	7
CUT_GIM_1073	CUT_GIM_1073	CUT_GIM_1073	0	0	1	5	2	3	40	19	17	7	0	4	1	1	0	2	5	2	1	0	0	2	3	4	0	0	1	3	2	3	3	8	8	2	0	2	4	2	0	1	5	1	4	0	0	2	2
CUT_GIM_1074	CUT_GIM_1074	CUT_GIM_1074	0	0	0	2	0	0	8	5	7	1	0	0	0	0	0	2	0	2	0	1	1	0	0	0	0	0	0	1	0	0	1	2	3	0	0	0	0	0	0	1	0	1	0	3	2	0	0
CUT_GIM_1075	CUT_GIM_1075	CUT_GIM_1075	2	2	4	3	3	2	144	32	27	17	0	17	1	0	1	6	1	3	2	0	2	2	5	2	2	3	4	2	3	2	12	13	12	4	0	8	4	0	3	3	1	2	8	0	4	2	4
CUT_GIM_1076	CUT_GIM_1076	CUT_GIM_1076	0	0	1	4	0	2	40	16	15	6	0	4	0	1	0	2	5	2	1	0	0	1	3	4	0	0	1	3	0	2	3	7	7	1	0	2	0	2	0	1	5	1	4	0	0	1	2
CUT_GIM_1077	CUT_GIM_1077	CUT_GIM_1077	0	0	0	2	0	0	48	38	32	2	0	1	0	0	0	1	0	1	0	0	0	1	1	1	0	0	0	1	0	0	4	16	15	0	0	0	0	0	0	0	0	1	0	0	0	1	1
CUT_GIM_1078	CUT_GIM_1078	CUT_GIM_1078	34	4	16	33	34	53	642	52	54	146	0	31	10	16	9	105	52	60	4	9	15	39	52	70	36	7	16	22	34	47	55	22	25	36	0	14	35	28	24	52	48	38	15	23	33	35	43
CUT_GIM_1079	CUT_GIM_1079	CUT_GIM_1079	4	3	7	8	7	8	152	62	113	25	0	10	2	6	7	27	12	15	1	2	4	9	8	28	4	5	7	5	7	7	13	26	51	6	0	5	7	10	18	13	11	9	4	5	9	8	7
CUT_GIM_1080	CUT_GIM_1080	CUT_GIM_1080	1	0	2	0	0	0	10	3	4	2	0	0	0	0	0	1	0	0	0	0	1	0	1	0	1	0	2	0	0	0	1	1	2	0	0	0	0	0	0	0	0	0	0	0	2	0	1
CUT_GIM_1081	CUT_GIM_1081	CUT_GIM_1081	0	0	2	2	1	1	70	38	32	8	1	4	1	1	0	4	0	7	1	0	1	1	2	5	0	0	2	1	1	1	6	16	15	2	14	2	4	2	0	2	0	4	4	0	2	1	2
CUT_GIM_1082	CUT_GIM_1082	CUT_GIM_1082	34	9	23	25	14	13	670	148	144	111	2	47	3	12	4	31	8	21	11	8	11	14	25	31	36	15	23	17	14	11	58	62	65	27	27	22	11	21	10	15	7	13	42	20	24	12	21
CUT_GIM_1083	CUT_GIM_1083	CUT_GIM_1083	0	1	0	0	3	0	100	22	25	17	0	10	1	0	1	6	0	4	0	0	0	4	1	5	0	2	0	0	3	0	9	9	11	4	0	5	4	0	3	3	0	3	0	0	0	4	1
CUT_GIM_1084	CUT_GIM_1084	CUT_GIM_1084	0	0	8	3	5	2	128	33	49	17	0	18	0	0	1	10	3	5	0	0	1	4	1	7	0	0	8	2	5	2	11	14	22	4	0	8	0	0	3	5	3	3	0	0	2	4	1
CUT_GIM_1085	CUT_GIM_1085	CUT_GIM_1085	9	5	3	16	13	20	460	51	58	102	0	37	0	18	3	21	22	44	6	5	9	18	23	43	10	9	3	11	13	18	40	21	26	25	0	17	0	31	8	10	20	28	23	13	20	16	19
CUT_GIM_1086	CUT_GIM_1086	CUT_GIM_1086	223	129	268	405	839	789	7262	669	471	947	5	259	81	234	184	916	808	1379	60	147	183	536	935	1270	239	220	267	276	849	698	626	279	214	233	68	121	287	407	482	450	746	867	230	370	403	476	771
CUT_GIM_1087	CUT_GIM_1087	CUT_GIM_1087	4	1	6	11	11	7	106	27	23	16	0	10	2	3	0	6	2	6	0	3	0	4	3	8	4	2	6	7	11	6	9	11	10	4	0	5	7	5	0	3	2	4	0	8	0	4	2
CUT_GIM_1088	CUT_GIM_1088	CUT_GIM_1088	0	1	6	3	0	4	50	35	49	2	0	0	1	0	0	1	0	0	0	0	1	2	2	4	0	2	6	2	0	4	4	15	22	0	0	0	4	0	0	0	0	0	0	0	2	2	2
CUT_GIM_1089	CUT_GIM_1089	CUT_GIM_1089	3	0	0	1	0	1	62	23	25	6	0	5	0	3	0	4	1	4	1	0	0	4	2	3	3	0	0	1	0	1	5	10	11	1	0	2	0	5	0	2	1	3	4	0	0	4	2
CUT_GIM_1090	CUT_GIM_1090	CUT_GIM_1090	0	0	1	1	1	2	22	6	9	3	0	1	0	0	0	1	1	0	0	0	0	0	0	1	0	0	1	1	1	2	2	2	4	1	0	0	0	0	0	0	1	0	0	0	0	0	0
CUT_GIM_1091	CUT_GIM_1091	CUT_GIM_1091	8	2	1	7	7	14	52	11	6	8	0	3	0	2	1	22	8	10	0	3	2	10	7	12	9	3	1	5	7	12	4	5	3	2	0	1	0	3	3	11	7	6	0	8	4	9	6
CUT_GIM_1092	CUT_GIM_1092	CUT_GIM_1092	0	0	1	1	0	0	12	4	7	0	0	0	0	0	0	1	0	1	0	0	0	0	0	1	0	0	1	1	0	0	1	2	3	0	0	0	0	0	0	0	0	1	0	0	0	0	0
CUT_GIM_1093	CUT_GIM_1093	CUT_GIM_1093	0	1	1	1	2	1	52	29	35	7	0	1	0	1	1	1	1	0	0	0	1	4	1	5	0	2	1	1	2	1	4	12	16	2	0	0	0	2	3	0	1	0	0	0	2	4	1
CUT_GIM_1094	CUT_GIM_1094	CUT_GIM_1094	136	21	79	66	87	114	394	55	68	581	0	169	10	49	40	273	199	349	13	27	42	173	244	384	146	36	79	45	88	101	34	23	31	143	0	79	35	85	105	134	184	219	50	68	92	154	201
CUT_GIM_1095	CUT_GIM_1095	CUT_GIM_1095	2	0	6	4	3	1	160	46	44	11	0	9	0	0	1	7	6	4	0	0	0	3	1	5	2	0	6	3	3	1	14	19	20	3	0	4	0	0	3	3	6	3	0	0	0	3	1
CUT_GIM_1096	CUT_GIM_1096	CUT_GIM_1096	1	0	2	1	1	0	96	43	37	2	0	1	2	0	0	0	1	3	1	0	1	2	2	4	1	0	2	1	1	0	8	18	17	0	0	0	7	0	0	0	1	2	4	0	2	2	2
CUT_GIM_1097	CUT_GIM_1097	CUT_GIM_1097	7	1	4	11	14	8	264	59	38	25	1	17	2	3	3	17	4	8	1	2	2	8	6	16	8	2	4	7	14	7	23	25	17	6	14	8	7	5	8	8	4	5	4	5	4	7	5
CUT_GIM_1098	CUT_GIM_1098	CUT_GIM_1098	1	0	0	2	1	1	18	6	7	0	0	2	0	0	2	3	1	0	0	0	1	1	0	0	1	0	0	1	1	1	2	2	3	0	0	1	0	0	5	1	1	0	0	0	2	1	0
CUT_GIM_1099	CUT_GIM_1099	CUT_GIM_1099	8	2	5	2	6	6	76	11	3	12	0	14	1	2	0	12	2	5	0	2	1	4	5	11	9	3	5	1	6	5	7	5	1	3	0	7	4	3	0	6	2	3	0	5	2	4	4
CUT_GIM_1100	CUT_GIM_1100	CUT_GIM_1100	117	22	53	68	38	56	652	205	206	261	1	105	10	29	17	169	55	107	11	22	21	85	110	166	125	38	53	46	38	50	56	85	94	64	14	49	35	50	45	83	51	67	42	55	46	76	91
CUT_GIM_1101	CUT_GIM_1101	CUT_GIM_1101	1	0	1	2	2	2	36	8	10	6	0	3	0	0	0	2	0	2	0	0	1	2	1	3	1	0	1	1	2	2	3	3	5	1	0	1	0	0	0	1	0	1	0	0	2	2	1
CUT_GIM_1102	CUT_GIM_1102	CUT_GIM_1102	0	0	0	0	0	0	2	5	8	0	0	0	0	0	0	0	1	0	0	0	0	0	0	0	0	0	0	0	0	0	0	2	4	0	0	0	0	0	0	0	1	0	0	0	0	0	0
CUT_GIM_1103	CUT_GIM_1103	CUT_GIM_1103	2	0	2	5	10	4	54	13	7	16	0	12	0	3	0	8	5	10	0	1	2	2	3	7	2	0	2	3	10	4	5	5	3	4	0	6	0	5	0	4	5	6	0	3	4	2	2
CUT_GIM_1104	CUT_GIM_1104	CUT_GIM_1104	19	6	5	12	14	16	158	48	53	83	2	18	2	15	4	30	19	20	1	7	8	20	15	35	20	10	5	8	14	14	14	20	24	20	27	8	7	26	10	15	18	13	4	18	18	18	12
CUT_GIM_1105	CUT_GIM_1105	CUT_GIM_1105	1	3	2	4	7	7	78	8	22	9	0	1	1	3	2	6	0	6	3	0	1	3	7	3	1	5	2	3	7	6	7	3	10	2	0	0	4	5	5	3	0	4	12	0	2	3	6
CUT_GIM_1106	CUT_GIM_1106	CUT_GIM_1106	9	8	14	18	18	15	994	241	154	33	1	58	0	2	3	18	10	8	1	5	2	5	9	22	10	14	14	12	18	13	86	100	70	8	14	27	0	3	8	9	9	5	4	13	4	4	7
CUT_GIM_1107	CUT_GIM_1107	CUT_GIM_1107	2	0	1	0	1	0	8	6	10	3	0	1	0	0	0	3	1	0	0	0	2	0	0	4	2	0	1	0	1	0	1	2	5	1	0	0	0	0	0	1	1	0	0	0	4	0	0
CUT_GIM_1108	CUT_GIM_1108	CUT_GIM_1108	6	1	6	10	6	12	176	56	68	20	0	9	1	5	3	7	11	14	1	3	3	8	10	14	6	2	6	7	6	11	15	23	31	5	0	4	4	9	8	3	10	9	4	8	7	7	8
CUT_GIM_1109	CUT_GIM_1109	CUT_GIM_1109	0	0	0	1	1	0	16	6	13	6	0	3	0	0	0	0	0	2	0	0	0	2	0	0	0	0	0	1	1	0	1	2	6	1	0	1	0	0	0	0	0	1	0	0	0	2	0
CUT_GIM_1110	CUT_GIM_1110	CUT_GIM_1110	0	0	1	2	2	1	42	9	10	3	0	4	0	1	0	4	1	1	1	1	0	0	1	2	0	0	1	1	2	1	4	4	5	1	0	2	0	2	0	2	1	1	4	3	0	0	1
CUT_GIM_1111	CUT_GIM_1111	CUT_GIM_1111	1	0	1	1	5	4	54	14	11	18	0	4	2	4	0	11	6	7	0	2	3	2	2	4	1	0	1	1	5	4	5	6	5	4	0	2	7	7	0	5	6	4	0	5	7	2	2
CUT_GIM_1112	CUT_GIM_1112	CUT_GIM_1112	3	3	1	7	8	4	332	79	58	54	0	8	2	3	4	12	4	9	2	1	0	5	5	6	3	5	1	5	8	4	29	33	26	13	0	4	7	5	10	6	4	6	8	3	0	4	4
CUT_GIM_1113	CUT_GIM_1113	CUT_GIM_1113	1	0	2	2	1	1	106	50	42	2	0	1	2	0	0	0	1	3	2	0	2	2	2	4	1	0	2	1	1	1	9	21	19	0	0	0	7	0	0	0	1	2	8	0	4	2	2
CUT_GIM_1114	CUT_GIM_1114	CUT_GIM_1114	0	0	0	6	8	4	30	4	7	18	1	13	1	1	3	16	3	9	3	2	3	7	6	6	0	0	0	4	8	4	3	2	3	4	14	6	4	2	8	8	3	6	12	5	7	6	5
CUT_GIM_1115	CUT_GIM_1115	CUT_GIM_1115	0	0	1	0	1	0	16	15	23	1	0	0	0	0	0	3	1	4	0	0	0	0	0	4	0	0	1	0	1	0	1	6	10	0	0	0	0	0	0	1	1	3	0	0	0	0	0
CUT_GIM_1116	CUT_GIM_1116	CUT_GIM_1116	0	0	0	1	0	0	6	9	9	2	0	0	0	0	0	0	0	0	0	0	0	1	0	0	0	0	0	1	0	0	1	4	4	0	0	0	0	0	0	0	0	0	0	0	0	1	0
CUT_GIM_1117	CUT_GIM_1117	CUT_GIM_1117	0	2	1	5	0	0	46	33	50	3	0	2	1	1	0	2	2	0	0	1	0	1	0	0	0	3	1	3	0	0	4	14	23	1	0	1	4	2	0	1	2	0	0	3	0	1	0
CUT_GIM_1118	CUT_GIM_1118	CUT_GIM_1118	11	3	10	20	12	28	188	46	51	98	0	39	7	14	7	22	14	16	4	7	13	6	14	22	12	5	10	14	12	25	16	19	23	24	0	18	25	24	18	11	13	10	15	18	29	5	12
CUT_GIM_1119	CUT_GIM_1119	CUT_GIM_1119	12	7	11	78	39	38	396	76	86	97	4	38	9	16	14	63	26	28	10	15	9	29	27	42	13	12	11	53	39	34	34	32	39	24	55	18	32	28	37	31	24	18	38	38	20	26	22
CUT_GIM_1120	CUT_GIM_1120	CUT_GIM_1120	8	8	4	14	9	9	114	40	50	19	0	11	2	5	3	11	8	7	3	1	2	4	8	9	9	14	4	10	9	8	10	17	23	5	0	5	7	9	8	5	7	4	12	3	4	4	7
CUT_GIM_1121	CUT_GIM_1121	CUT_GIM_1121	0	2	4	5	1	3	64	14	9	3	0	5	1	0	0	5	0	2	0	1	0	2	0	7	0	3	4	3	1	3	6	6	4	1	0	2	4	0	0	2	0	1	0	3	0	2	0
CUT_GIM_1122	CUT_GIM_1122	CUT_GIM_1122	1	0	0	4	1	2	18	4	2	5	0	0	0	0	0	2	1	2	0	1	2	4	1	0	1	0	0	3	1	2	2	2	1	1	0	0	0	0	0	1	1	1	0	3	4	4	1
CUT_GIM_1123	CUT_GIM_1123	CUT_GIM_1123	1	4	3	8	7	6	42	25	46	7	1	8	3	7	4	10	3	7	1	1	6	8	5	8	1	7	3	5	7	5	4	10	21	2	14	4	11	12	10	5	3	4	4	3	13	7	4
CUT_GIM_1124	CUT_GIM_1124	CUT_GIM_1124	0	0	0	0	0	2	34	10	18	3	0	0	1	0	0	0	0	2	0	0	0	1	0	0	0	0	0	0	0	2	3	4	8	1	0	0	4	0	0	0	0	1	0	0	0	1	0
CUT_GIM_1125	CUT_GIM_1125	CUT_GIM_1125	2	0	0	0	1	0	8	24	14	0	0	0	0	0	0	0	0	2	0	0	0	3	1	0	2	0	0	0	1	0	1	10	6	0	0	0	0	0	0	0	0	1	0	0	0	3	1
CUT_GIM_1126	CUT_GIM_1126	CUT_GIM_1126	19	6	18	36	33	42	324	48	55	94	1	38	1	6	10	39	18	36	3	2	7	19	18	41	20	10	18	25	33	37	28	20	25	23	14	18	4	10	26	19	17	23	12	5	15	17	15
CUT_GIM_1127	CUT_GIM_1127	CUT_GIM_1127	0	0	2	1	0	0	14	15	4	2	1	4	0	1	0	1	2	4	0	0	0	1	0	1	0	0	2	1	0	0	1	6	2	0	14	2	0	2	0	0	2	3	0	0	0	1	0
CUT_GIM_1128	CUT_GIM_1128	CUT_GIM_1128	0	0	1	0	1	0	12	13	20	1	0	0	0	0	0	2	1	4	0	0	0	0	0	4	0	0	1	0	1	0	1	5	9	0	0	0	0	0	0	1	1	3	0	0	0	0	0
CUT_GIM_1129	CUT_GIM_1129	CUT_GIM_1129	0	1	1	0	0	0	4	5	10	0	0	1	0	0	0	1	1	0	0	0	0	0	0	0	0	2	1	0	0	0	0	2	5	0	0	0	0	0	0	0	1	0	0	0	0	0	0
CUT_GIM_1130	CUT_GIM_1130	CUT_GIM_1130	32	14	25	67	56	61	1544	254	203	203	5	98	6	19	11	63	36	43	9	7	14	33	41	63	34	24	25	46	57	54	133	106	92	50	68	46	21	33	29	31	33	27	35	18	31	29	34
CUT_GIM_1131	CUT_GIM_1131	CUT_GIM_1131	42	30	55	260	178	212	2542	525	412	189	1	133	36	51	36	171	75	81	24	40	47	88	73	147	45	51	55	177	180	187	219	219	187	47	14	62	128	89	94	84	69	51	92	101	103	78	60
CUT_GIM_1132	CUT_GIM_1132	CUT_GIM_1132	0	0	0	1	0	0	22	9	5	0	0	0	0	0	0	0	0	0	0	0	0	1	0	0	0	0	0	1	0	0	2	4	2	0	0	0	0	0	0	0	0	0	0	0	0	1	0
CUT_GIM_1133	CUT_GIM_1133	CUT_GIM_1133	0	0	2	2	1	1	54	26	19	3	0	2	0	1	0	5	3	2	1	0	1	2	1	6	0	0	2	1	1	1	5	11	9	1	0	1	0	2	0	2	3	1	4	0	2	2	1
CUT_GIM_1134	CUT_GIM_1134	CUT_GIM_1134	3	3	2	8	8	4	358	81	63	56	0	8	2	3	5	13	5	9	3	1	2	6	5	7	3	5	2	5	8	4	31	34	29	14	0	4	7	5	13	6	5	6	12	3	4	5	4
CUT_GIM_1135	CUT_GIM_1135	CUT_GIM_1135	0	3	8	9	7	8	132	52	54	9	0	21	0	3	2	9	4	4	1	0	3	3	7	11	0	5	8	6	7	7	11	22	25	2	0	10	0	5	5	4	4	3	4	0	7	3	6
CUT_GIM_1136	CUT_GIM_1136	CUT_GIM_1136	60	16	45	50	69	104	442	73	63	198	1	56	5	34	26	158	119	197	7	23	19	99	154	219	64	27	45	34	70	92	38	30	29	49	14	26	18	59	68	78	110	124	27	58	42	88	127
CUT_GIM_1137	CUT_GIM_1137	CUT_GIM_1137	0	0	1	2	1	0	24	11	6	4	0	2	1	0	1	0	1	0	0	0	0	1	0	1	0	0	1	1	1	0	2	5	3	1	0	1	4	0	3	0	1	0	0	0	0	1	0
CUT_GIM_1138	CUT_GIM_1138	CUT_GIM_1138	10	2	10	49	48	55	180	26	24	66	2	67	1	6	3	14	18	17	1	5	2	12	13	13	11	3	10	33	49	49	16	11	11	16	27	31	4	10	8	7	17	11	4	13	4	11	11
CUT_GIM_1139	CUT_GIM_1139	CUT_GIM_1139	9	8	12	15	8	9	382	92	102	38	2	22	1	3	4	15	7	11	0	2	6	10	6	17	10	14	12	10	8	8	33	38	46	9	27	10	4	5	10	7	6	7	0	5	13	9	5
CUT_GIM_1140	CUT_GIM_1140	CUT_GIM_1140	13	2	7	14	10	4	206	44	25	23	0	16	0	3	2	11	3	5	3	4	3	6	12	14	14	3	7	10	10	4	18	18	11	6	0	7	0	5	5	5	3	3	12	10	7	5	10
CUT_GIM_1141	CUT_GIM_1141	CUT_GIM_1141	0	0	0	0	0	0	10	8	17	0	0	0	0	0	0	0	0	0	0	0	0	0	1	0	0	0	0	0	0	0	1	3	8	0	0	0	0	0	0	0	0	0	0	0	0	0	1
CUT_GIM_1142	CUT_GIM_1142	CUT_GIM_1142	289	88	190	141	176	223	4670	465	532	1875	18	818	27	84	65	242	209	338	16	72	54	134	228	358	310	150	189	96	178	197	403	194	242	462	246	382	96	146	170	119	193	212	61	181	119	119	188
CUT_GIM_1143	CUT_GIM_1143	CUT_GIM_1143	1	1	1	2	2	1	50	13	12	7	0	2	1	1	1	3	1	0	0	0	0	0	0	3	1	2	1	1	2	1	4	5	5	2	0	1	4	2	3	1	1	0	0	0	0	0	0
CUT_GIM_1144	CUT_GIM_1144	CUT_GIM_1144	2	0	3	0	0	2	94	34	41	5	0	3	0	0	0	8	0	2	0	0	0	1	1	2	2	0	3	0	0	2	8	14	19	1	0	1	0	0	0	4	0	1	0	0	0	1	1
CUT_GIM_1145	CUT_GIM_1145	CUT_GIM_1145	0	0	0	0	0	0	8	3	3	1	0	0	0	1	0	0	0	0	1	0	0	1	0	0	0	0	0	0	0	0	1	1	1	0	0	0	0	2	0	0	0	0	4	0	0	1	0
CUT_GIM_1146	CUT_GIM_1146	CUT_GIM_1146	0	0	0	0	1	0	0	1	0	2	0	0	0	0	0	0	0	0	0	0	0	0	0	0	0	0	0	0	1	0	0	0	0	0	0	0	0	0	0	0	0	0	0	0	0	0	0
CUT_GIM_1147	CUT_GIM_1147	CUT_GIM_1147	8	1	1	1	6	8	64	6	7	28	0	12	1	3	0	5	6	5	0	2	1	6	11	10	9	2	1	1	6	7	6	2	3	7	0	6	4	5	0	2	6	3	0	5	2	5	9
CUT_GIM_1148	CUT_GIM_1148	CUT_GIM_1148	4	3	3	10	8	12	134	61	50	24	0	7	2	7	4	29	5	12	3	3	4	7	13	14	4	5	3	7	8	11	12	25	23	6	0	3	7	12	10	14	5	8	12	8	9	6	11
CUT_GIM_1149	CUT_GIM_1149	CUT_GIM_1149	1	2	1	4	1	3	50	38	49	13	0	10	0	2	2	11	2	4	1	1	1	4	0	5	1	3	1	3	1	3	4	16	22	3	0	5	0	3	5	5	2	3	4	3	2	4	0
CUT_GIM_1150	CUT_GIM_1150	CUT_GIM_1150	12	4	9	5	7	9	122	55	61	31	1	17	0	2	2	12	7	11	1	2	1	8	14	21	13	7	9	3	7	8	11	23	28	8	14	8	0	3	5	6	6	7	4	5	2	7	12
CUT_GIM_1151	CUT_GIM_1151	CUT_GIM_1151	9	2	4	0	2	1	110	31	39	16	0	31	1	2	0	13	3	8	0	1	1	3	5	13	10	3	4	0	2	1	9	13	18	4	0	14	4	3	0	6	3	5	0	3	2	3	4
CUT_GIM_1152	CUT_GIM_1152	CUT_GIM_1152	0	0	0	0	0	0	24	10	11	1	0	0	0	0	0	0	0	0	0	0	1	1	0	1	0	0	0	0	0	0	2	4	5	0	0	0	0	0	0	0	0	0	0	0	2	1	0
CUT_GIM_1153	CUT_GIM_1153	CUT_GIM_1153	17	1	5	17	23	26	192	49	33	58	1	25	3	5	2	53	35	43	0	8	5	16	30	35	18	2	5	12	23	23	17	20	15	14	14	12	11	9	5	26	32	27	0	20	11	14	25
CUT_GIM_1154	CUT_GIM_1154	CUT_GIM_1154	5	3	2	8	3	1	204	62	42	15	1	13	1	3	1	8	6	2	1	3	2	3	5	7	5	5	2	5	3	1	18	26	19	4	14	6	4	5	3	4	6	1	4	8	4	3	4
CUT_GIM_1155	CUT_GIM_1155	CUT_GIM_1155	0	2	2	2	2	1	56	30	23	9	0	4	0	0	0	3	2	2	1	0	0	2	2	1	0	3	2	1	2	1	5	12	10	2	0	2	0	0	0	1	2	1	4	0	0	2	2
CUT_GIM_1156	CUT_GIM_1156	CUT_GIM_1156	299	57	182	101	152	166	1074	142	117	1156	4	751	28	78	43	445	271	494	18	54	58	308	334	519	321	97	181	69	154	147	93	59	53	285	55	350	99	136	113	219	250	311	69	136	128	274	275
CUT_GIM_1157	CUT_GIM_1157	CUT_GIM_1157	15	6	14	17	14	24	568	61	71	172	0	45	5	20	17	70	30	40	10	17	18	40	27	74	16	10	14	12	14	21	49	25	32	42	0	21	18	35	45	34	28	25	38	43	40	36	22
CUT_GIM_1158	CUT_GIM_1158	CUT_GIM_1158	2	6	5	4	4	1	70	36	47	10	0	6	0	1	1	4	5	10	0	1	1	0	8	9	2	10	5	3	4	1	6	15	21	2	0	3	0	2	3	2	5	6	0	3	2	0	7
CUT_GIM_1159	CUT_GIM_1159	CUT_GIM_1159	173	44	98	66	70	112	1056	282	301	458	8	261	12	67	45	108	135	250	13	58	57	61	155	240	186	75	97	45	71	99	91	117	137	113	109	122	43	117	118	53	125	157	50	146	125	54	128
CUT_GIM_1160	CUT_GIM_1160	CUT_GIM_1160	21	6	29	14	10	8	1212	109	111	153	0	25	3	11	6	60	21	38	5	5	8	36	34	39	23	10	29	10	10	7	104	45	50	38	0	12	11	19	16	29	19	24	19	13	18	32	28
CUT_GIM_1161	CUT_GIM_1161	CUT_GIM_1161	4	2	5	7	5	4	130	53	32	16	0	11	2	4	0	6	3	5	1	2	1	6	3	4	4	3	5	5	5	4	11	22	15	4	0	5	7	7	0	3	3	3	4	5	2	5	2
CUT_GIM_1162	CUT_GIM_1162	CUT_GIM_1162	827	122	414	260	427	585	3582	293	373	2955	5	956	53	187	159	904	570	1051	56	196	239	426	688	1032	887	208	412	177	432	517	309	122	170	728	68	446	188	326	416	444	526	661	215	493	526	378	567
CUT_GIM_1163	CUT_GIM_1163	CUT_GIM_1163	0	0	0	0	0	0	52	23	13	1	0	0	0	2	0	0	1	0	0	0	2	1	0	0	0	0	0	0	0	0	4	10	6	0	0	0	0	3	0	0	1	0	0	0	4	1	0
CUT_GIM_1164	CUT_GIM_1164	CUT_GIM_1164	12	5	14	8	14	12	310	75	76	59	0	22	3	5	7	28	15	27	1	3	1	12	18	27	13	9	14	5	14	11	27	31	35	15	0	10	11	9	18	14	14	17	4	8	2	11	15
CUT_GIM_1165	CUT_GIM_1165	CUT_GIM_1165	0	0	1	0	7	2	10	6	6	0	0	0	0	2	2	1	3	0	0	0	0	1	0	3	0	0	1	0	7	2	1	2	3	0	0	0	0	3	5	0	3	0	0	0	0	1	0
CUT_GIM_1166	CUT_GIM_1166	CUT_GIM_1166	13	4	11	8	19	20	178	20	18	81	1	17	4	6	8	47	19	22	3	9	11	23	26	47	14	7	11	5	19	18	15	8	8	20	14	8	14	10	21	23	18	14	12	23	24	20	21
CUT_GIM_1167	CUT_GIM_1167	CUT_GIM_1167	1	0	0	1	2	3	40	20	21	5	0	5	1	1	1	4	2	1	0	1	1	3	2	3	1	0	0	1	2	3	3	8	10	1	0	2	4	2	3	2	2	1	0	3	2	3	2
CUT_GIM_1168	CUT_GIM_1168	CUT_GIM_1168	174	79	128	222	221	250	2854	511	460	938	7	511	44	145	81	506	265	384	41	86	107	343	218	502	187	135	127	151	224	221	246	213	209	231	96	238	156	252	212	249	245	241	157	216	235	305	180
CUT_GIM_1169	CUT_GIM_1169	CUT_GIM_1169	2	1	4	1	0	1	40	16	26	3	0	8	0	1	0	2	2	2	1	0	0	0	3	4	2	2	4	1	0	1	3	7	12	1	0	4	0	2	0	1	2	1	4	0	0	0	2
CUT_GIM_1170	CUT_GIM_1170	CUT_GIM_1170	0	1	5	0	0	0	40	26	26	0	0	0	0	1	0	2	0	1	0	0	1	1	0	3	0	2	5	0	0	0	3	11	12	0	0	0	0	2	0	1	0	1	0	0	2	1	0
CUT_GIM_1171	CUT_GIM_1171	CUT_GIM_1171	5	6	5	4	2	1	118	49	35	24	0	4	1	5	0	9	3	5	0	1	1	7	4	11	5	10	5	3	2	1	10	20	16	6	0	2	4	9	0	4	3	3	0	3	2	6	3
CUT_GIM_1172	CUT_GIM_1172	CUT_GIM_1172	8	5	4	6	11	11	180	22	27	68	0	26	1	7	3	37	7	24	3	3	5	17	17	38	9	9	4	4	11	10	16	9	12	17	0	12	4	12	8	18	6	15	12	8	11	15	14
CUT_GIM_1173	CUT_GIM_1173	CUT_GIM_1173	0	0	3	1	0	3	22	5	8	2	0	1	0	0	0	1	1	0	0	1	0	1	0	0	0	0	3	1	0	3	2	2	4	0	0	0	0	0	0	0	1	0	0	3	0	1	0
CUT_GIM_1174	CUT_GIM_1174	CUT_GIM_1174	0	0	0	0	0	1	12	11	18	2	0	1	0	0	0	0	0	0	0	0	0	0	0	2	0	0	0	0	0	1	1	5	8	0	0	0	0	0	0	0	0	0	0	0	0	0	0
CUT_GIM_1175	CUT_GIM_1175	CUT_GIM_1175	0	1	1	0	0	0	22	10	6	4	0	2	1	0	0	1	0	0	0	1	2	3	0	3	0	2	1	0	0	0	2	4	3	1	0	1	4	0	0	0	0	0	0	3	4	3	0
CUT_GIM_1176	CUT_GIM_1176	CUT_GIM_1176	0	1	0	2	0	2	14	1	0	3	0	0	0	6	3	5	4	4	1	1	5	6	3	10	0	2	0	1	0	2	1	0	0	1	0	0	0	10	8	2	4	3	4	3	11	5	2
CUT_GIM_1177	CUT_GIM_1177	CUT_GIM_1177	5	2	5	27	20	24	152	25	45	24	1	15	3	2	3	11	7	6	4	3	3	8	8	7	5	3	5	18	20	21	13	10	20	6	14	7	11	3	8	5	6	4	15	8	7	7	7
CUT_GIM_1178	CUT_GIM_1178	CUT_GIM_1178	1	1	4	3	2	1	58	17	28	2	0	1	0	0	0	3	0	1	0	2	3	2	1	2	1	2	4	2	2	1	5	7	13	0	0	0	0	0	0	1	0	1	0	5	7	2	1
CUT_GIM_1179	CUT_GIM_1179	CUT_GIM_1179	1	5	7	11	2	5	156	62	72	17	0	2	1	3	2	10	6	7	0	4	1	3	5	5	1	9	7	7	2	4	13	26	33	4	0	1	4	5	5	5	6	4	0	10	2	3	4
CUT_GIM_1180	CUT_GIM_1180	CUT_GIM_1180	0	2	1	1	1	2	30	16	11	2	0	2	0	1	0	3	0	0	0	0	0	1	0	4	0	3	1	1	1	2	3	7	5	0	0	1	0	2	0	1	0	0	0	0	0	1	0
CUT_GIM_1181	CUT_GIM_1181	CUT_GIM_1181	0	0	1	2	1	0	108	21	28	4	0	6	0	0	1	6	2	3	0	0	1	1	1	1	0	0	1	1	1	0	9	9	13	1	0	3	0	0	3	3	2	2	0	0	2	1	1
CUT_GIM_1182	CUT_GIM_1182	CUT_GIM_1182	5	0	5	1	3	0	96	38	50	5	0	3	2	1	1	5	2	6	2	0	1	1	3	6	5	0	5	1	3	0	8	16	23	1	0	1	7	2	3	2	2	4	8	0	2	1	2
CUT_GIM_1183	CUT_GIM_1183	CUT_GIM_1183	4	7	9	33	34	37	128	35	22	53	2	16	6	9	11	50	18	28	6	15	9	16	16	38	4	12	9	22	34	33	11	15	10	13	27	7	21	16	29	25	17	18	23	38	20	14	13
CUT_GIM_1184	CUT_GIM_1184	CUT_GIM_1184	8	2	8	16	7	14	134	67	47	24	1	19	0	18	8	12	6	11	3	8	9	13	12	20	9	3	8	11	7	12	12	28	21	6	14	9	0	31	21	6	6	7	12	20	20	12	10
CUT_GIM_1185	CUT_GIM_1185	CUT_GIM_1185	2	1	6	11	7	5	138	44	33	14	0	9	1	0	3	5	3	2	0	2	3	3	5	6	2	2	6	7	7	4	12	18	15	3	0	4	4	0	8	2	3	1	0	5	7	3	4
CUT_GIM_1186	CUT_GIM_1186	CUT_GIM_1186	0	1	1	3	3	5	12	2	9	4	0	4	0	2	0	2	1	1	1	0	0	3	0	1	0	2	1	2	3	4	1	1	4	1	0	2	0	3	0	1	1	1	4	0	0	3	0
CUT_GIM_1187	CUT_GIM_1187	CUT_GIM_1187	0	2	1	2	2	0	28	6	10	6	0	2	2	0	0	0	0	0	0	0	1	0	0	0	0	3	1	1	2	0	2	2	5	1	0	1	7	0	0	0	0	0	0	0	2	0	0
CUT_GIM_1188	CUT_GIM_1188	CUT_GIM_1188	0	0	2	5	0	1	16	7	15	1	0	0	1	1	0	5	0	3	0	0	0	1	3	3	0	0	2	3	0	1	1	3	7	0	0	0	4	2	0	2	0	2	0	0	0	1	2
CUT_GIM_1189	CUT_GIM_1189	CUT_GIM_1189	1	2	1	1	0	1	26	20	29	5	0	3	0	0	0	6	0	1	0	0	0	0	2	0	1	3	1	1	0	1	2	8	13	1	0	1	0	0	0	3	0	1	0	0	0	0	2
CUT_GIM_1190	CUT_GIM_1190	CUT_GIM_1190	0	1	1	0	0	0	36	6	8	1	0	0	0	0	0	2	0	0	0	0	0	1	0	0	0	2	1	0	0	0	3	2	4	0	0	0	0	0	0	1	0	0	0	0	0	1	0
CUT_GIM_1191	CUT_GIM_1191	CUT_GIM_1191	1	0	1	2	0	0	16	7	7	4	0	3	1	3	0	3	3	0	1	0	0	0	2	1	1	0	1	1	0	0	1	3	3	1	0	1	4	5	0	1	3	0	4	0	0	0	2
CUT_GIM_1192	CUT_GIM_1192	CUT_GIM_1192	402	158	370	680	903	818	11318	2104	1931	1856	21	1051	99	246	179	783	577	724	95	194	181	470	698	949	431	270	368	463	913	723	976	876	878	457	287	490	351	428	469	385	532	455	365	488	398	418	576
CUT_GIM_1193	CUT_GIM_1193	CUT_GIM_1193	37	14	39	20	20	16	280	56	59	197	0	160	2	4	2	55	34	50	1	6	17	28	22	67	40	24	39	14	20	14	24	23	27	49	0	75	7	7	5	27	31	31	4	15	37	25	18
CUT_GIM_1194	CUT_GIM_1194	CUT_GIM_1194	15	1	21	10	8	12	354	76	73	72	1	20	2	13	2	35	13	21	4	3	5	18	23	43	16	2	21	7	8	11	31	32	33	18	14	9	7	23	5	17	12	13	15	8	11	16	19
CUT_GIM_1195	CUT_GIM_1195	CUT_GIM_1195	267	110	217	296	363	388	2008	683	515	678	10	370	43	116	64	265	254	440	25	115	99	159	318	397	286	188	216	202	367	343	173	284	234	167	137	173	153	202	168	130	234	277	96	289	218	141	262
CUT_GIM_1196	CUT_GIM_1196	CUT_GIM_1196	0	1	8	2	2	1	140	121	148	3	0	2	1	0	1	10	5	3	0	0	0	4	1	7	0	2	8	1	2	1	12	50	67	1	0	1	4	0	3	5	5	2	0	0	0	4	1
CUT_GIM_1197	CUT_GIM_1197	CUT_GIM_1197	5	2	5	27	20	24	150	24	44	24	1	15	3	2	3	11	7	6	4	3	3	8	8	7	5	3	5	18	20	21	13	10	20	6	14	7	11	3	8	5	6	4	15	8	7	7	7
CUT_GIM_1198	CUT_GIM_1198	CUT_GIM_1198	8	8	11	9	6	4	276	73	52	38	3	8	2	2	3	9	5	6	0	3	1	8	6	14	9	14	11	6	6	4	24	30	24	9	41	4	7	3	8	4	5	4	0	8	2	7	5
CUT_GIM_1199	CUT_GIM_1199	CUT_GIM_1199	9	1	0	12	10	7	144	20	36	26	0	11	3	5	1	11	5	7	0	3	5	7	8	13	10	2	0	8	10	6	12	8	16	6	0	5	11	9	3	5	5	4	0	8	11	6	7
CUT_GIM_1200	CUT_GIM_1200	CUT_GIM_1200	5	2	10	12	9	14	206	136	150	61	0	30	13	14	7	45	22	30	9	6	17	31	24	38	5	3	10	8	9	12	18	57	68	15	0	14	46	24	18	22	20	19	35	15	37	28	20
CUT_GIM_1201	CUT_GIM_1201	CUT_GIM_1201	1	1	3	4	1	1	30	35	41	2	0	3	0	1	0	4	3	6	0	1	1	3	0	3	1	2	3	3	1	1	3	15	19	0	0	1	0	2	0	2	3	4	0	3	2	3	0
CUT_GIM_1202	CUT_GIM_1202	CUT_GIM_1202	2	1	2	6	3	8	104	40	54	16	0	10	2	3	1	15	2	4	1	1	1	4	4	11	2	2	2	4	3	7	9	17	25	4	0	5	7	5	3	7	2	3	4	3	2	4	3
CUT_GIM_1203	CUT_GIM_1203	CUT_GIM_1203	0	0	0	1	0	0	4	0	1	2	0	0	0	0	0	0	0	0	0	0	0	0	0	1	0	0	0	1	0	0	0	0	0	0	0	0	0	0	0	0	0	0	0	0	0	0	0
CUT_GIM_1204	CUT_GIM_1204	CUT_GIM_1204	0	0	0	1	0	0	22	12	18	4	0	4	0	0	0	1	0	3	1	0	0	1	1	0	0	0	0	1	0	0	2	5	8	1	0	2	0	0	0	0	0	2	4	0	0	1	1
CUT_GIM_1205	CUT_GIM_1205	CUT_GIM_1205	32	5	20	11	19	26	140	19	16	145	1	26	4	9	8	51	51	57	3	10	11	30	46	58	34	9	20	7	19	23	12	8	7	36	14	12	14	16	21	25	47	36	12	25	24	27	38
CUT_GIM_1206	CUT_GIM_1206	CUT_GIM_1206	0	1	1	0	0	0	22	21	32	0	0	0	0	0	1	2	2	2	0	1	0	0	0	3	0	2	1	0	0	0	2	9	15	0	0	0	0	0	3	1	2	1	0	3	0	0	0
CUT_GIM_1207	CUT_GIM_1207	CUT_GIM_1207	408	152	359	598	841	779	10976	2047	1889	1838	22	1224	96	241	170	774	556	714	91	188	183	455	693	937	438	260	357	407	851	689	946	852	859	453	300	571	341	420	445	380	513	449	349	473	403	404	571
CUT_GIM_1208	CUT_GIM_1208	CUT_GIM_1208	32	15	20	14	17	42	326	79	113	119	0	26	1	17	12	66	48	73	4	7	12	28	53	82	34	26	20	10	17	37	28	33	51	29	0	12	4	30	31	32	44	46	15	18	26	25	44
CUT_GIM_1209	CUT_GIM_1209	CUT_GIM_1209	4233	1313	3077	1769	2071	2704	22364	3612	4256	10917	144	5925	370	894	598	5064	3881	7817	269	661	893	2203	5187	6731	4540	2243	3060	1205	2095	2390	1928	1504	1934	2690	1966	2764	1312	1556	1566	2489	3581	4913	1033	1662	1964	1957	4277
CUT_GIM_1210	CUT_GIM_1210	CUT_GIM_1210	0	0	0	1	0	0	34	21	23	3	0	1	0	0	0	0	1	1	0	0	1	0	0	1	0	0	0	1	0	0	3	9	10	1	0	0	0	0	0	0	1	1	0	0	2	0	0
CUT_GIM_1211	CUT_GIM_1211	CUT_GIM_1211	0	1	1	1	0	0	2	12	16	0	0	0	0	0	0	1	0	0	0	0	0	0	0	1	0	2	1	1	0	0	0	5	7	0	0	0	0	0	0	0	0	0	0	0	0	0	0
CUT_GIM_1212	CUT_GIM_1212	CUT_GIM_1212	23	9	21	23	14	12	682	144	135	113	1	329	8	6	4	71	20	39	1	6	9	14	50	59	25	15	21	16	14	11	59	60	61	28	14	153	28	10	10	35	18	25	4	15	20	12	41
CUT_GIM_1213	CUT_GIM_1213	CUT_GIM_1213	1	0	1	5	1	5	12	8	1	4	0	1	1	2	0	4	1	3	1	1	1	0	0	6	1	0	1	3	1	4	1	3	0	1	0	0	4	3	0	2	1	2	4	3	2	0	0
CUT_GIM_1214	CUT_GIM_1214	CUT_GIM_1214	0	0	0	0	1	0	4	3	1	0	0	1	0	0	0	0	0	0	0	0	0	0	0	0	0	0	0	0	1	0	0	1	0	0	0	0	0	0	0	0	0	0	0	0	0	0	0
CUT_GIM_1215	CUT_GIM_1215	CUT_GIM_1215	2	3	2	0	0	4	84	49	30	3	0	7	1	0	0	3	0	1	0	0	1	0	1	2	2	5	2	0	0	4	7	20	14	1	0	3	4	0	0	1	0	1	0	0	2	0	1
CUT_GIM_1216	CUT_GIM_1216	CUT_GIM_1216	0	2	1	2	2	0	30	8	11	6	0	2	2	0	0	0	0	0	0	0	1	0	0	1	0	3	1	1	2	0	3	3	5	1	0	1	7	0	0	0	0	0	0	0	2	0	0
CUT_GIM_1217	CUT_GIM_1217	CUT_GIM_1217	0	0	0	1	0	0	4	4	2	0	0	0	0	0	0	0	0	0	0	0	0	0	0	0	0	0	0	1	0	0	0	2	1	0	0	0	0	0	0	0	0	0	0	0	0	0	0
CUT_GIM_1218	CUT_GIM_1218	CUT_GIM_1218	0	0	1	0	1	0	18	13	14	1	0	5	0	0	1	2	0	2	0	1	1	0	1	1	0	0	1	0	1	0	2	5	6	0	0	2	0	0	3	1	0	1	0	3	2	0	1
CUT_GIM_1219	CUT_GIM_1219	CUT_GIM_1219	1	1	2	5	2	5	138	27	32	15	0	9	1	1	2	12	3	2	0	0	1	3	1	4	1	2	2	3	2	4	12	11	15	4	0	4	4	2	5	6	3	1	0	0	2	3	1
CUT_GIM_1220	CUT_GIM_1220	CUT_GIM_1220	2	2	0	2	4	5	30	5	6	5	0	3	0	1	0	2	1	0	0	0	0	1	1	2	2	3	0	1	4	4	3	2	3	1	0	1	0	2	0	1	1	0	0	0	0	1	1
CUT_GIM_1221	CUT_GIM_1221	CUT_GIM_1221	66	21	36	54	29	30	386	67	70	168	2	58	13	22	14	102	46	72	3	15	15	30	52	106	71	36	36	37	29	27	33	28	32	41	27	27	46	38	37	50	42	45	12	38	33	27	43
CUT_GIM_1222	CUT_GIM_1222	CUT_GIM_1222	2	2	3	3	4	5	158	43	42	7	0	20	2	2	3	14	2	6	1	3	0	7	4	8	2	3	3	2	4	4	14	18	19	2	0	9	7	3	8	7	2	4	4	8	0	6	3
CUT_GIM_1223	CUT_GIM_1223	CUT_GIM_1223	1	0	1	4	1	1	52	24	20	5	0	5	1	2	1	2	0	1	0	0	0	1	0	5	1	0	1	3	1	1	4	10	9	1	0	2	4	3	3	1	0	1	0	0	0	1	0
CUT_GIM_1224	CUT_GIM_1224	CUT_GIM_1224	11	3	11	17	13	10	246	54	62	46	0	28	4	12	6	27	9	22	4	7	4	10	16	27	12	5	11	12	13	9	21	22	28	11	0	13	14	21	16	13	8	14	15	18	9	9	13
CUT_GIM_1225	CUT_GIM_1225	CUT_GIM_1225	2984	2112	2879	1982	1086	1197	23688	2950	2326	13424	183	5166	292	437	283	3369	2988	4612	286	431	294	2039	3600	5074	3200	3608	2864	1350	1098	1058	2042	1229	1057	3308	2499	2410	1036	761	741	1656	2757	2899	1098	1084	647	1811	2968
CUT_GIM_1226	CUT_GIM_1226	CUT_GIM_1226	3	0	7	6	6	10	182	42	56	22	0	10	2	5	1	15	6	6	0	4	2	6	6	3	3	0	7	4	6	9	16	17	25	5	0	5	7	9	3	7	6	4	0	10	4	5	5
CUT_GIM_1227	CUT_GIM_1227	CUT_GIM_1227	3	0	1	3	1	6	10	5	5	1	0	0	0	0	0	4	2	1	0	0	0	2	0	0	3	0	1	2	1	5	1	2	2	0	0	0	0	0	0	2	2	1	0	0	0	2	0
CUT_GIM_1228	CUT_GIM_1228	CUT_GIM_1228	3	3	2	3	2	2	162	81	90	20	0	8	0	1	1	5	2	1	1	1	1	6	3	5	3	5	2	2	2	2	14	34	41	5	0	4	0	2	3	2	2	1	4	3	2	5	2
CUT_GIM_1229	CUT_GIM_1229	CUT_GIM_1229	8	5	4	9	3	3	246	85	97	31	0	10	2	3	0	10	3	5	0	3	4	10	6	14	9	9	4	6	3	3	21	35	44	8	0	5	7	5	0	5	3	3	0	8	9	9	5
CUT_GIM_1230	CUT_GIM_1230	CUT_GIM_1230	255	121	219	97	114	102	2390	394	408	828	11	542	20	77	62	285	271	439	20	47	51	146	274	410	273	207	218	66	115	90	206	164	185	204	150	253	71	134	162	140	250	276	77	118	112	130	226
CUT_GIM_1231	CUT_GIM_1231	CUT_GIM_1231	9	4	4	23	6	10	278	47	45	85	0	38	10	23	9	22	10	20	4	6	6	12	15	32	10	7	4	16	6	9	24	20	20	21	0	18	35	40	24	11	9	13	15	15	13	11	12
CUT_GIM_1232	CUT_GIM_1232	CUT_GIM_1232	4	1	4	24	20	24	128	24	37	22	1	15	2	2	3	11	7	6	4	3	2	7	8	7	4	2	4	16	20	21	11	10	17	5	14	7	7	3	8	5	6	4	15	8	4	6	7
CUT_GIM_1233	CUT_GIM_1233	CUT_GIM_1233	0	0	2	3	0	0	16	6	14	1	0	0	1	1	0	4	0	2	0	0	0	1	3	1	0	0	2	2	0	0	1	2	6	0	0	0	4	2	0	2	0	1	0	0	0	1	2
CUT_GIM_1234	CUT_GIM_1234	CUT_GIM_1234	2	4	2	6	3	6	98	37	46	13	0	8	0	1	1	10	2	2	1	2	0	1	4	4	2	7	2	4	3	5	8	15	21	3	0	4	0	2	3	5	2	1	4	5	0	1	3
CUT_GIM_1235	CUT_GIM_1235	CUT_GIM_1235	149	44	91	85	140	161	2220	307	293	818	1	344	25	102	57	373	196	300	16	62	81	239	176	385	160	75	91	58	142	142	191	128	133	202	14	160	89	178	149	183	181	189	61	156	178	212	145
CUT_GIM_1236	CUT_GIM_1236	CUT_GIM_1236	33	16	24	99	105	118	680	112	101	230	5	149	8	31	13	85	54	62	13	23	23	60	59	88	35	27	24	67	106	104	59	47	46	57	68	70	28	54	34	42	50	39	50	58	51	53	49
CUT_GIM_1237	CUT_GIM_1237	CUT_GIM_1237	1	5	7	12	2	6	160	63	73	17	0	2	1	3	2	10	6	7	0	4	2	3	6	5	1	9	7	8	2	5	14	26	33	4	0	1	4	5	5	5	6	4	0	10	4	3	5
CUT_GIM_1238	CUT_GIM_1238	CUT_GIM_1238	0	0	2	5	2	8	14	6	15	7	0	1	0	5	2	6	1	3	0	1	1	3	1	4	0	0	2	3	2	7	1	2	7	2	0	0	0	9	5	3	1	2	0	3	2	3	1
CUT_GIM_1239	CUT_GIM_1239	CUT_GIM_1239	2	2	2	0	0	0	62	13	20	3	0	5	0	0	0	2	1	0	1	0	1	2	2	2	2	3	2	0	0	0	5	5	9	1	0	2	0	0	0	1	1	0	4	0	2	2	2
CUT_GIM_1240	CUT_GIM_1240	CUT_GIM_1240	0	0	0	0	1	0	18	4	2	1	0	2	0	0	0	0	0	2	0	0	0	0	2	0	0	0	0	0	1	0	2	2	1	0	0	1	0	0	0	0	0	1	0	0	0	0	2
CUT_GIM_1241	CUT_GIM_1241	CUT_GIM_1241	15	3	6	10	9	7	508	60	53	64	1	41	5	8	3	55	8	18	1	6	6	5	26	29	16	5	6	7	9	6	44	25	24	16	14	19	18	14	8	27	7	11	4	15	13	4	21
CUT_GIM_1242	CUT_GIM_1242	CUT_GIM_1242	0	0	0	0	0	0	2	22	17	0	0	0	0	0	0	1	1	0	0	0	1	0	1	2	0	0	0	0	0	0	0	9	8	0	0	0	0	0	0	0	1	0	0	0	2	0	1
CUT_GIM_1243	CUT_GIM_1243	CUT_GIM_1243	0	0	0	0	0	2	14	5	11	3	0	0	1	0	0	3	1	0	0	2	0	4	0	6	0	0	0	0	0	2	1	2	5	1	0	0	4	0	0	1	1	0	0	5	0	4	0
CUT_GIM_1244	CUT_GIM_1244	CUT_GIM_1244	0	0	1	2	2	1	214	14	18	8	1	3	0	1	0	1	1	6	0	1	1	4	1	6	0	0	1	1	2	1	18	6	8	2	14	1	0	2	0	0	1	4	0	3	2	4	1
CUT_GIM_1245	CUT_GIM_1245	CUT_GIM_1245	0	0	0	0	0	1	14	7	9	0	0	1	1	0	0	1	0	0	0	0	0	0	0	1	0	0	0	0	0	1	1	3	4	0	0	0	4	0	0	0	0	0	0	0	0	0	0
CUT_GIM_1246	CUT_GIM_1246	CUT_GIM_1246	2	2	0	1	2	3	74	28	26	15	1	7	3	2	0	9	2	1	2	1	2	3	3	4	2	3	0	1	2	3	6	12	12	4	14	3	11	3	0	4	2	1	8	3	4	3	2
CUT_GIM_1247	CUT_GIM_1247	CUT_GIM_1247	1	1	1	0	0	0	12	9	7	1	0	1	0	0	0	0	0	0	0	0	0	0	1	1	1	2	1	0	0	0	1	4	3	0	0	0	0	0	0	0	0	0	0	0	0	0	1
CUT_GIM_1248	CUT_GIM_1248	CUT_GIM_1248	4	0	3	7	1	4	172	45	45	26	0	11	3	6	0	5	8	7	2	3	1	4	1	6	4	0	3	5	1	4	15	19	20	6	0	5	11	10	0	2	7	4	8	8	2	4	1
CUT_GIM_1249	CUT_GIM_1249	CUT_GIM_1249	0	0	0	0	0	0	8	5	9	1	0	0	0	0	0	1	0	0	0	1	0	1	0	4	0	0	0	0	0	0	1	2	4	0	0	0	0	0	0	0	0	0	0	3	0	1	0
CUT_GIM_1250	CUT_GIM_1250	CUT_GIM_1250	79	16	60	34	23	37	614	112	120	234	3	109	10	24	13	78	60	96	4	12	14	29	52	89	85	27	60	23	23	33	53	47	55	58	41	51	35	42	34	38	55	60	15	30	31	26	43
CUT_GIM_1251	CUT_GIM_1251	CUT_GIM_1251	1485	341	1230	708	1154	1523	5850	509	418	4851	14	1290	156	605	495	4599	3127	5192	129	374	619	2087	3798	5670	1593	583	1223	482	1167	1346	504	212	190	1196	191	602	553	1053	1296	2260	2885	3263	495	940	1361	1854	3131
CUT_GIM_1252	CUT_GIM_1252	CUT_GIM_1252	1	1	1	1	3	3	92	18	16	7	0	1	0	1	2	4	2	4	0	2	1	0	6	1	1	2	1	1	3	3	8	7	7	2	0	0	0	2	5	2	2	3	0	5	2	0	5
CUT_GIM_1253	CUT_GIM_1253	CUT_GIM_1253	0	1	2	2	2	0	28	21	27	4	0	0	0	0	0	3	0	1	0	0	0	0	0	2	0	2	2	1	2	0	2	9	12	1	0	0	0	0	0	1	0	1	0	0	0	0	0
CUT_GIM_1254	CUT_GIM_1254	CUT_GIM_1254	0	2	2	0	0	0	68	26	49	3	0	2	0	2	3	3	3	0	0	1	0	0	0	1	0	3	2	0	0	0	6	11	22	1	0	1	0	3	8	1	3	0	0	3	0	0	0
CUT_GIM_1255	CUT_GIM_1255	CUT_GIM_1255	3	0	3	18	6	10	128	29	27	23	0	3	4	10	7	24	6	9	3	2	9	13	9	14	3	0	3	12	6	9	11	12	12	6	0	1	14	17	18	12	6	6	12	5	20	12	7
CUT_GIM_1256	CUT_GIM_1256	CUT_GIM_1256	1	6	12	17	12	10	270	229	275	32	1	16	4	2	1	29	12	16	2	3	8	8	5	16	1	10	12	12	12	9	23	95	125	8	14	7	14	3	3	14	11	10	8	8	18	7	4
CUT_GIM_1257	CUT_GIM_1257	CUT_GIM_1257	5	3	2	10	4	5	88	32	38	9	0	6	1	2	2	4	4	3	1	1	0	1	2	8	5	5	2	7	4	4	8	13	17	2	0	3	4	3	5	2	4	2	4	3	0	1	2
CUT_GIM_1258	CUT_GIM_1258	CUT_GIM_1258	7	5	8	13	11	10	300	61	54	46	1	18	2	8	2	22	12	17	3	2	9	8	12	21	8	9	8	9	11	9	26	25	25	11	14	8	7	14	5	11	11	11	12	5	20	7	10
CUT_GIM_1259	CUT_GIM_1259	CUT_GIM_1259	8	1	8	3	9	9	86	12	4	26	0	7	3	4	0	15	7	15	0	1	2	3	11	14	9	2	8	2	9	8	7	5	2	6	0	3	11	7	0	7	6	9	0	3	4	3	9
CUT_GIM_1260	CUT_GIM_1260	CUT_GIM_1260	1	2	2	0	1	1	54	12	23	7	0	5	1	4	0	4	2	4	2	1	0	1	4	5	1	3	2	0	1	1	5	5	10	2	0	2	4	7	0	2	2	3	8	3	0	1	3
CUT_GIM_1261	CUT_GIM_1261	CUT_GIM_1261	2	0	4	8	9	16	58	17	17	56	0	16	3	12	1	26	14	15	4	6	1	14	9	23	2	0	4	5	9	14	5	7	8	14	0	7	11	21	3	13	13	9	15	15	2	12	7
CUT_GIM_1262	CUT_GIM_1262	CUT_GIM_1262	0	0	0	0	0	0	6	1	0	2	0	0	0	0	0	1	1	0	1	0	1	1	0	1	0	0	0	0	0	0	1	0	0	0	0	0	0	0	0	0	1	0	4	0	2	1	0
CUT_GIM_1263	CUT_GIM_1263	CUT_GIM_1263	68	36	73	379	212	211	1736	422	314	297	2	123	52	93	62	191	92	126	39	38	73	87	102	166	73	62	73	258	214	187	150	176	143	73	27	57	184	162	162	94	85	79	150	96	161	77	84
CUT_GIM_1264	CUT_GIM_1264	CUT_GIM_1264	0	0	0	4	2	3	64	38	40	3	0	2	0	2	0	2	1	1	0	1	0	1	0	0	0	0	0	3	2	3	6	16	18	1	0	1	0	3	0	1	1	1	0	3	0	1	0
CUT_GIM_1265	CUT_GIM_1265	CUT_GIM_1265	88	35	68	73	71	77	766	92	114	470	4	121	7	29	21	138	105	184	11	19	29	97	134	199	94	60	68	50	72	68	66	38	52	116	55	56	25	50	55	68	97	116	42	48	64	86	110
CUT_GIM_1266	CUT_GIM_1266	CUT_GIM_1266	27537	5198	9877	1619	192089	308126	127690	1451	1600	55275	45	3803	359	444810	401803	10048	54115	71944	281	536735	298498	4155	14709	18382	29534	8881	9824	1103	194288	272397	11007	604	727	13622	614	1774	1273	774330	1052017	4938	49934	45221	1079	1349713	656535	3691	12128
CUT_GIM_1267	CUT_GIM_1267	CUT_GIM_1267	216	36	120	65	121	157	1056	82	105	756	0	297	9	62	46	439	245	479	10	48	73	182	340	513	232	62	119	44	122	139	91	34	48	186	0	139	32	108	120	216	226	301	38	121	161	162	280
CUT_GIM_1268	CUT_GIM_1268	CUT_GIM_1268	8	5	17	11	16	16	698	51	49	92	1	63	0	9	9	51	27	52	1	5	6	36	43	67	9	9	17	7	16	14	60	21	22	23	14	29	0	16	24	25	25	33	4	13	13	32	35
CUT_GIM_1269	CUT_GIM_1269	CUT_GIM_1269	206	106	206	261	322	300	1310	356	347	745	9	212	34	102	61	324	260	435	38	66	68	222	314	423	221	181	205	178	326	265	113	148	158	184	123	99	121	178	160	159	240	273	146	166	150	197	259
CUT_GIM_1270	CUT_GIM_1270	CUT_GIM_1270	1	0	0	0	0	0	10	10	14	0	0	0	0	0	0	1	0	0	0	1	0	0	0	0	1	0	0	0	0	0	1	4	6	0	0	0	0	0	0	0	0	0	0	3	0	0	0
CUT_GIM_1271	CUT_GIM_1271	CUT_GIM_1271	16	8	13	34	27	17	366	58	63	91	0	28	7	7	5	22	20	23	2	6	3	14	13	33	17	14	13	23	27	15	32	24	29	22	0	13	25	12	13	11	18	14	8	15	7	12	11
CUT_GIM_1272	CUT_GIM_1272	CUT_GIM_1272	184	62	152	117	197	205	990	223	242	657	8	162	19	63	37	253	184	329	23	42	46	159	244	326	197	106	151	80	199	181	85	93	110	162	109	76	67	110	97	124	170	207	88	106	101	141	201
CUT_GIM_1273	CUT_GIM_1273	CUT_GIM_1273	3	0	10	10	7	3	134	55	62	18	0	10	1	3	1	15	6	3	1	3	1	2	12	8	3	0	10	7	7	3	12	23	28	4	0	5	4	5	3	7	6	2	4	8	2	2	10
CUT_GIM_1274	CUT_GIM_1274	CUT_GIM_1274	1	6	2	4	0	1	102	60	62	1	0	4	0	1	0	6	3	2	2	0	0	1	3	4	1	10	2	3	0	1	9	25	28	0	0	2	0	2	0	3	3	1	8	0	0	1	2
CUT_GIM_1275	CUT_GIM_1275	CUT_GIM_1275	1	0	2	2	1	3	40	23	30	5	0	2	2	1	0	2	1	1	0	1	1	3	2	1	1	0	2	1	1	3	3	10	14	1	0	1	7	2	0	1	1	1	0	3	2	3	2
CUT_GIM_1276	CUT_GIM_1276	CUT_GIM_1276	3	1	3	2	0	3	92	12	16	17	0	4	1	2	1	8	7	3	2	2	1	3	6	12	3	2	3	1	0	3	8	5	7	4	0	2	4	3	3	4	6	2	8	5	2	3	5
CUT_GIM_1277	CUT_GIM_1277	CUT_GIM_1277	1	1	1	9	7	4	76	27	21	14	0	9	0	1	2	4	2	3	2	1	2	4	5	4	1	2	1	6	7	4	7	11	10	3	0	4	0	2	5	2	2	2	8	3	4	4	4
CUT_GIM_1278	CUT_GIM_1278	CUT_GIM_1278	7	5	8	12	6	8	308	47	36	26	0	21	0	5	4	17	4	5	1	2	1	8	8	5	8	9	8	8	6	7	27	20	16	6	0	10	0	9	10	8	4	3	4	5	2	7	7
CUT_GIM_1279	CUT_GIM_1279	CUT_GIM_1279	30662	6174	11370	2187	213974	344790	145748	1856	1953	62357	87	4571	470	503000	451551	11709	61019	80953	353	599879	333358	5045	17054	21319	32886	10548	11309	1490	216424	304810	12563	773	888	15368	1188	2133	1667	875628	1182269	5755	56305	50884	1355	1508500	733208	4482	14061
CUT_GIM_1280	CUT_GIM_1280	CUT_GIM_1280	1	0	0	1	0	1	20	8	7	2	0	4	0	2	1	6	2	2	0	0	3	0	1	3	1	0	0	1	0	1	2	3	3	0	0	2	0	3	3	3	2	1	0	0	7	0	1
CUT_GIM_1281	CUT_GIM_1281	CUT_GIM_1281	42	19	46	21	13	10	3658	460	301	161	3	107	7	15	18	42	17	19	3	3	5	11	17	35	45	32	46	14	13	9	315	192	137	40	41	50	25	26	47	21	16	12	12	8	11	10	14
CUT_GIM_1282	CUT_GIM_1282	CUT_GIM_1282	32	11	28	33	22	24	398	76	65	98	0	55	8	10	6	36	21	25	5	4	4	18	26	39	34	19	28	22	22	21	34	32	30	24	0	26	28	17	16	18	19	16	19	10	9	16	21
CUT_GIM_1283	CUT_GIM_1283	CUT_GIM_1283	3	0	2	3	4	7	70	34	25	28	0	2	0	2	2	8	5	9	3	0	1	9	7	17	3	0	2	2	4	6	6	14	11	7	0	1	0	3	5	4	5	6	12	0	2	8	6
CUT_GIM_1284	CUT_GIM_1284	CUT_GIM_1284	0	0	1	1	1	2	54	26	18	23	0	13	6	4	0	17	7	5	4	0	3	3	8	9	0	0	1	1	1	2	5	11	8	6	0	6	21	7	0	8	6	3	15	0	7	3	7
CUT_GIM_1285	CUT_GIM_1285	CUT_GIM_1285	0	0	0	2	1	0	16	11	15	3	0	2	0	2	0	2	1	2	1	0	0	1	3	2	0	0	0	1	1	0	1	5	7	1	0	1	0	3	0	1	1	1	4	0	0	1	2
CUT_GIM_1286	CUT_GIM_1286	CUT_GIM_1286	3	4	6	4	5	4	102	13	24	27	0	11	2	4	2	6	8	16	0	1	3	3	5	18	3	7	6	3	5	4	9	5	11	7	0	5	7	7	5	3	7	10	0	3	7	3	4
CUT_GIM_1287	CUT_GIM_1287	CUT_GIM_1287	1	2	0	1	0	0	100	21	36	4	0	2	0	0	0	2	0	1	0	0	0	1	2	0	1	3	0	1	0	0	9	9	16	1	0	1	0	0	0	1	0	1	0	0	0	1	2
CUT_GIM_1288	CUT_GIM_1288	CUT_GIM_1288	2	0	0	0	0	0	6	5	5	1	0	1	0	0	1	0	0	0	0	1	0	2	0	0	2	0	0	0	0	0	1	2	2	0	0	0	0	0	3	0	0	0	0	3	0	2	0
CUT_GIM_1289	CUT_GIM_1289	CUT_GIM_1289	0	0	1	1	0	0	28	5	4	1	0	0	0	0	0	0	0	0	0	0	0	0	0	0	0	0	1	1	0	0	2	2	2	0	0	0	0	0	0	0	0	0	0	0	0	0	0
CUT_GIM_1290	CUT_GIM_1290	CUT_GIM_1290	7	5	5	4	5	5	238	44	50	26	0	11	0	1	0	5	5	5	1	0	0	6	2	9	8	9	5	3	5	4	21	18	23	6	0	5	0	2	0	2	5	3	4	0	0	5	2
CUT_GIM_1291	CUT_GIM_1291	CUT_GIM_1291	0	0	4	3	1	3	100	28	38	5	0	4	0	0	0	3	3	3	1	0	0	4	2	1	0	0	4	2	1	3	9	12	17	1	0	2	0	0	0	1	3	2	4	0	0	4	2
CUT_GIM_1292	CUT_GIM_1292	CUT_GIM_1292	0	0	0	5	0	0	8	13	12	0	0	1	0	0	0	0	1	1	1	0	0	1	0	1	0	0	0	3	0	0	1	5	5	0	0	0	0	0	0	0	1	1	4	0	0	1	0
CUT_GIM_1293	CUT_GIM_1293	CUT_GIM_1293	3	1	3	1	3	2	54	15	31	5	0	1	1	1	0	4	0	2	0	1	1	0	1	3	3	2	3	1	3	2	5	6	14	1	0	0	4	2	0	2	0	1	0	3	2	0	1
CUT_GIM_1294	CUT_GIM_1294	CUT_GIM_1294	1	0	0	0	0	0	22	6	12	2	0	0	0	0	0	2	0	1	0	0	0	0	0	1	1	0	0	0	0	0	2	2	5	0	0	0	0	0	0	1	0	1	0	0	0	0	0
CUT_GIM_1295	CUT_GIM_1295	CUT_GIM_1295	5	3	3	6	7	13	190	53	40	18	0	4	2	2	2	8	6	5	1	0	0	3	6	8	5	5	3	4	7	11	16	22	18	4	0	2	7	3	5	4	6	3	4	0	0	3	5
CUT_GIM_1296	CUT_GIM_1296	CUT_GIM_1296	0	0	0	0	0	0	56	28	42	2	0	4	0	0	0	0	1	1	0	0	0	0	1	0	0	0	0	0	0	0	5	12	19	0	0	2	0	0	0	0	1	1	0	0	0	0	1
CUT_GIM_1297	CUT_GIM_1297	CUT_GIM_1297	4	3	5	14	8	9	78	17	24	34	2	12	2	19	8	29	14	15	3	12	7	19	22	41	4	5	5	10	8	8	7	7	11	8	27	6	7	33	21	14	13	9	12	30	15	17	18
CUT_GIM_1298	CUT_GIM_1298	CUT_GIM_1298	0	0	0	1	0	0	24	10	11	0	0	0	0	1	0	0	1	0	0	0	0	0	0	1	0	0	0	1	0	0	2	4	5	0	0	0	0	2	0	0	1	0	0	0	0	0	0
CUT_GIM_1299	CUT_GIM_1299	CUT_GIM_1299	5	1	4	8	12	3	158	95	87	3	0	3	1	1	2	14	1	7	0	1	2	5	4	4	5	2	4	5	12	3	14	40	40	1	0	1	4	2	5	7	1	4	0	3	4	4	3
CUT_GIM_1300	CUT_GIM_1300	CUT_GIM_1300	75	25	44	49	66	93	378	69	74	361	2	97	11	20	24	93	62	148	8	17	14	44	90	177	80	43	44	33	67	82	33	29	34	89	27	45	39	35	63	46	57	93	31	43	31	39	74
CUT_GIM_1301	CUT_GIM_1301	CUT_GIM_1301	2	1	1	1	4	5	52	12	10	5	0	0	0	4	1	3	5	11	3	0	0	5	0	0	2	2	1	1	4	4	4	5	5	1	0	0	0	7	3	1	5	7	12	0	0	4	0
CUT_GIM_1302	CUT_GIM_1302	CUT_GIM_1302	2	1	3	7	4	4	70	15	14	16	0	10	0	1	1	3	3	7	2	1	1	0	3	6	2	2	3	5	4	4	6	6	6	4	0	5	0	2	3	1	3	4	8	3	2	0	2
CUT_GIM_1303	CUT_GIM_1303	CUT_GIM_1303	0	0	1	6	4	8	52	19	20	4	0	0	1	0	0	4	1	1	0	0	0	1	2	2	0	0	1	4	4	7	4	8	9	1	0	0	4	0	0	2	1	1	0	0	0	1	2
CUT_GIM_1304	CUT_GIM_1304	CUT_GIM_1304	1	0	1	12	8	5	42	16	12	6	0	11	1	1	0	7	3	7	1	2	1	2	3	3	1	0	1	8	8	4	4	7	5	1	0	5	4	2	0	3	3	4	4	5	2	2	2
CUT_GIM_1305	CUT_GIM_1305	CUT_GIM_1305	0	0	1	0	1	0	12	3	5	2	0	2	0	0	1	2	0	0	1	0	0	0	0	1	0	0	1	0	1	0	1	1	2	0	0	1	0	0	3	1	0	0	4	0	0	0	0
CUT_GIM_1306	CUT_GIM_1306	CUT_GIM_1306	0	0	2	1	0	0	22	9	23	1	0	0	1	1	1	5	1	3	0	0	1	0	0	2	0	0	2	1	0	0	2	4	10	0	0	0	4	2	3	2	1	2	0	0	2	0	0
CUT_GIM_1307	CUT_GIM_1307	CUT_GIM_1307	3	1	0	8	4	5	100	97	62	13	0	5	2	1	2	10	4	7	2	4	2	3	4	8	3	2	0	5	4	4	9	40	28	3	0	2	7	2	5	5	4	4	8	10	4	3	3
CUT_GIM_1308	CUT_GIM_1308	CUT_GIM_1308	6	5	4	11	6	2	110	23	42	37	0	30	1	7	9	18	7	13	1	6	2	8	7	13	6	9	4	7	6	2	9	10	19	9	0	14	4	12	24	9	6	8	4	15	4	7	6
CUT_GIM_1309	CUT_GIM_1309	CUT_GIM_1309	5	6	10	23	13	19	476	114	107	44	2	29	4	7	3	16	10	4	2	0	3	12	5	16	5	10	10	16	13	17	41	47	49	11	27	14	14	12	8	8	9	3	8	0	7	11	4
CUT_GIM_1310	CUT_GIM_1310	CUT_GIM_1310	3	2	0	4	2	4	38	30	30	9	0	3	0	0	2	4	2	4	2	0	2	3	5	5	3	3	0	3	2	4	3	12	14	2	0	1	0	0	5	2	2	3	8	0	4	3	4
CUT_GIM_1311	CUT_GIM_1311	CUT_GIM_1311	0	0	1	1	0	2	36	24	15	19	0	5	6	4	0	15	6	3	4	0	3	3	7	7	0	0	1	1	0	2	3	10	7	5	0	2	21	7	0	7	6	2	15	0	7	3	6
CUT_GIM_1312	CUT_GIM_1312	CUT_GIM_1312	11	4	9	19	32	35	214	51	39	43	0	20	5	1	2	12	9	23	5	6	5	10	14	31	12	7	9	13	32	31	18	21	18	11	0	9	18	2	5	6	8	14	19	15	11	9	12
CUT_GIM_1313	CUT_GIM_1313	CUT_GIM_1313	0	0	1	0	1	0	8	15	10	0	0	0	0	0	0	0	0	0	1	0	0	0	0	0	0	0	1	0	1	0	1	6	5	0	0	0	0	0	0	0	0	0	4	0	0	0	0
CUT_GIM_1314	CUT_GIM_1314	CUT_GIM_1314	2	2	4	5	4	6	118	11	14	12	0	3	0	1	0	2	2	3	0	1	0	3	1	2	2	3	4	3	4	5	10	5	6	3	0	1	0	2	0	1	2	2	0	3	0	3	1
CUT_GIM_1315	CUT_GIM_1315	CUT_GIM_1315	0	0	0	1	0	0	18	17	15	1	0	0	0	0	0	1	0	0	0	0	0	2	1	0	0	0	0	1	0	0	2	7	7	0	0	0	0	0	0	0	0	0	0	0	0	2	1
CUT001	CUT001	CUT001	0	4	3	9	2	5	142	55	93	15	0	5	4	1	1	19	5	3	0	1	5	5	6	9	0	7	3	6	2	4	12	23	42	4	0	2	14	2	3	9	5	2	0	3	11	4	5
CUT002	CUT002	CUT002	4	0	3	7	1	4	172	45	45	26	0	11	3	6	0	5	8	7	2	3	1	4	1	6	4	0	3	5	1	4	15	19	20	6	0	5	11	10	0	2	7	4	8	8	2	4	1
CUT003	CUT003	CUT003	129	84	139	365	377	357	1826	219	197	735	14	206	60	159	139	244	200	514	38	175	131	203	251	349	138	144	138	249	381	316	157	91	90	181	191	96	213	277	364	120	185	323	146	440	288	180	207
CUT004	CUT004	CUT004	5	6	14	44	31	39	248	45	22	48	0	19	5	3	1	13	9	17	2	3	2	3	9	18	5	10	14	30	31	34	21	19	10	12	0	9	18	5	3	6	8	11	8	8	4	3	7
CUT005	CUT005	CUT005	2	2	0	1	2	3	74	28	25	15	1	7	3	2	0	9	2	1	2	1	2	3	3	4	2	3	0	1	2	3	6	12	11	4	14	3	11	3	0	4	2	1	8	3	4	3	2
CUT006	CUT006	CUT006	0	0	0	3	1	0	154	63	45	6	0	3	0	1	0	2	1	0	0	1	1	3	1	2	0	0	0	2	1	0	13	26	20	1	0	1	0	2	0	1	1	0	0	3	2	3	1
CUT007	CUT007	CUT007	3	0	1	2	1	2	38	30	35	4	0	2	2	1	1	6	3	0	0	1	0	6	3	1	3	0	1	1	1	2	3	12	16	1	0	1	7	2	3	3	3	0	0	3	0	5	2
CUT008	CUT008	CUT008	0	0	0	1	0	2	20	10	14	1	0	2	0	0	0	0	1	0	0	0	0	1	0	0	0	0	0	1	0	2	2	4	6	0	0	1	0	0	0	0	1	0	0	0	0	1	0
CUT009	CUT009	CUT009	5	2	3	2	4	1	208	30	21	13	0	4	2	1	1	2	2	1	0	0	0	1	0	7	5	3	3	1	4	1	18	12	10	3	0	2	7	2	3	1	2	1	0	0	0	1	0
CUT010	CUT010	CUT010	0	0	0	3	1	4	88	9	7	12	0	1	0	2	1	2	3	4	0	0	1	0	2	3	0	0	0	2	1	4	8	4	3	3	0	0	0	3	3	1	3	3	0	0	2	0	2
CUT011	CUT011	CUT011	1	1	5	7	1	1	96	34	34	10	0	2	0	0	0	6	4	7	1	0	1	1	2	3	1	2	5	5	1	1	8	14	15	2	0	1	0	0	0	3	4	4	4	0	2	1	2
CUT012	CUT012	CUT012	0	1	4	6	1	2	74	12	17	8	0	2	0	0	0	4	4	8	1	0	2	2	1	2	0	2	4	4	1	2	6	5	8	2	0	1	0	0	0	2	4	5	4	0	4	2	1
CUT013	CUT013	CUT013	0	0	0	0	0	0	8	6	8	1	0	0	0	0	0	0	1	1	0	0	0	0	0	1	0	0	0	0	0	0	1	2	4	0	0	0	0	0	0	0	1	1	0	0	0	0	0
CUT014	CUT014	CUT014	1	1	0	1	3	3	20	5	9	6	0	18	0	1	1	1	2	0	0	1	1	0	2	2	1	2	0	1	3	3	2	2	4	1	0	8	0	2	3	0	2	0	0	3	2	0	2
CUT015	CUT015	CUT015	0	0	2	2	2	0	8	7	14	0	0	0	0	0	2	1	1	0	0	0	0	0	0	0	0	0	2	1	2	0	1	3	6	0	0	0	0	0	5	0	1	0	0	0	0	0	0
CUT016	CUT016	CUT016	0	3	3	1	2	0	70	31	44	3	0	4	0	1	0	6	0	0	0	1	0	0	2	2	0	5	3	1	2	0	6	13	20	1	0	2	0	2	0	3	0	0	0	3	0	0	2
CUT017	CUT017	CUT017	6	5	6	36	39	33	262	75	102	39	0	24	12	11	12	41	15	33	7	11	8	17	12	35	6	9	6	25	39	29	23	31	46	10	0	11	43	19	31	20	14	21	27	28	18	15	10
CUT018	CUT018	CUT018	0	1	1	3	0	1	42	16	20	2	0	5	0	0	0	1	3	2	0	0	0	1	4	3	0	2	1	2	0	1	4	7	9	0	0	2	0	0	0	0	3	1	0	0	0	1	3
CUT019	CUT019	CUT019	4	0	5	4	5	1	144	25	39	14	0	2	0	1	2	5	3	7	0	1	0	4	3	3	4	0	5	3	5	1	12	10	18	3	0	1	0	2	5	2	3	4	0	3	0	4	2
CUT020	CUT020	CUT020	2	3	4	6	3	6	88	28	19	25	0	8	1	2	0	10	4	9	3	1	2	5	5	12	2	5	4	4	3	5	8	12	9	6	0	4	4	3	0	5	4	6	12	3	4	4	4
CUT021	CUT021	CUT021	2	4	8	5	1	6	150	65	85	14	0	6	3	2	4	16	5	5	3	2	3	12	4	9	2	7	8	3	1	5	13	27	39	3	0	3	11	3	10	8	5	3	12	5	7	11	3
CUT022	CUT022	CUT022	1	1	0	1	0	1	22	8	28	4	0	0	0	0	0	5	1	0	1	0	1	1	1	1	1	2	0	1	0	1	2	3	13	1	0	0	0	0	0	2	1	0	4	0	2	1	1
CUT023	CUT023	CUT023	1	2	4	1	0	0	44	31	33	7	0	0	0	1	2	7	4	2	0	2	0	0	1	3	1	3	4	1	0	0	4	13	15	2	0	0	0	2	5	3	4	1	0	5	0	0	1
CUT024	CUT024	CUT024	9	3	8	5	5	8	114	30	27	40	1	23	1	6	3	5	6	11	1	2	2	2	5	8	10	5	8	3	5	7	10	12	12	10	14	11	4	10	8	2	6	7	4	5	4	2	4
CUT025	CUT025	CUT025	4	3	3	19	5	10	138	43	32	66	2	33	5	8	13	29	20	29	9	7	9	24	9	23	4	5	3	13	5	9	12	18	15	16	27	15	18	14	34	14	18	18	35	18	20	21	7
CUT026	CUT026	CUT026	2	0	2	1	1	2	42	15	25	5	0	2	0	0	1	4	0	5	0	0	0	2	3	5	2	0	2	1	1	2	4	6	11	1	0	1	0	0	3	2	0	3	0	0	0	2	2
CUT027	CUT027	CUT027	6	3	5	5	4	8	108	33	39	6	0	3	1	3	0	9	1	4	0	0	1	3	3	6	6	5	5	3	4	7	9	14	18	1	0	1	4	5	0	4	1	3	0	0	2	3	2
CUT028	CUT028	CUT028	0	1	0	0	0	1	20	11	22	0	0	0	0	0	0	1	1	1	0	1	0	0	0	2	0	2	0	0	0	1	2	5	10	0	0	0	0	0	0	0	1	1	0	3	0	0	0
CUT029	CUT029	CUT029	0	1	5	2	1	0	18	50	43	2	0	0	0	0	1	1	1	0	0	0	1	1	0	2	0	2	5	1	1	0	2	21	20	0	0	0	0	0	3	0	1	0	0	0	2	1	0
CUT030	CUT030	CUT030	9	7	8	28	13	37	404	109	107	30	1	20	4	9	5	14	6	14	3	9	5	8	15	22	10	12	8	19	13	33	35	45	49	7	14	9	14	16	13	7	6	9	12	23	11	7	12
CUT031	CUT031	CUT031	0	0	0	2	0	2	30	6	9	2	0	2	0	0	0	1	2	1	1	0	0	1	0	0	0	0	0	1	0	2	3	2	4	0	0	1	0	0	0	0	2	1	4	0	0	1	0
CUT032	CUT032	CUT032	7	7	8	65	36	47	84	39	26	48	1	16	6	11	10	23	21	25	6	8	12	14	26	32	8	12	8	44	36	42	7	16	12	12	14	7	21	19	26	11	19	16	23	20	26	12	21
CUT033	CUT033	CUT033	0	0	1	0	0	0	10	5	4	1	0	0	0	0	0	1	0	0	0	0	0	0	0	1	0	0	1	0	0	0	1	2	2	0	0	0	0	0	0	0	0	0	0	0	0	0	0
CUT034	CUT034	CUT034	0	0	0	1	0	0	6	13	5	1	0	0	0	0	0	0	0	0	0	0	1	0	0	1	0	0	0	1	0	0	1	5	2	0	0	0	0	0	0	0	0	0	0	0	2	0	0
CUT035	CUT035	CUT035	6	1	10	14	8	9	528	131	130	27	0	10	4	6	2	17	3	10	3	3	1	9	3	8	6	2	10	10	8	8	46	55	59	7	0	5	14	10	5	8	3	6	12	8	2	8	2
CUT036	CUT036	CUT036	0	2	3	3	2	2	74	16	15	18	0	13	0	1	0	0	2	1	0	2	2	1	3	6	0	3	3	2	2	2	6	7	7	4	0	6	0	2	0	0	2	1	0	5	4	1	2
CUT037	CUT037	CUT037	0	0	1	2	1	2	24	7	29	1	0	1	0	1	0	7	1	1	0	0	0	0	0	1	0	0	1	1	1	2	2	3	13	0	0	0	0	2	0	3	1	1	0	0	0	0	0
CUT038	CUT038	CUT038	2	0	0	6	2	4	36	20	26	6	0	2	1	1	0	3	0	5	1	1	0	3	2	4	2	0	0	4	2	4	3	8	12	1	0	1	4	2	0	1	0	3	4	3	0	3	2
CUT039	CUT039	CUT039	0	0	1	2	2	1	34	6	9	5	0	2	0	0	1	3	0	2	0	2	1	1	2	2	0	0	1	1	2	1	3	2	4	1	0	1	0	0	3	1	0	1	0	5	2	1	2
CUT040	CUT040	CUT040	4	3	6	4	2	2	204	48	35	11	0	8	2	0	1	9	3	6	1	4	3	1	8	8	4	5	6	3	2	2	18	20	16	3	0	4	7	0	3	4	3	4	4	10	7	1	7
CUT041	CUT041	CUT041	0	0	2	4	0	2	52	42	53	2	0	1	0	1	0	4	3	1	0	0	1	1	1	1	0	0	2	3	0	2	4	17	24	0	0	0	0	2	0	2	3	1	0	0	2	1	1
CUT042	CUT042	CUT042	0	1	0	0	0	0	10	12	9	0	0	0	0	0	0	4	0	0	0	0	0	0	2	0	0	2	0	0	0	0	1	5	4	0	0	0	0	0	0	2	0	0	0	0	0	0	2
CUT043	CUT043	CUT043	2	2	3	5	2	4	182	47	51	21	0	16	2	1	0	10	8	2	0	1	0	1	3	3	2	3	3	3	2	4	16	20	23	5	0	7	7	2	0	5	7	1	0	3	0	1	2
CUT044	CUT044	CUT044	2	1	1	1	1	0	88	19	11	2	0	3	0	0	0	2	0	0	0	0	0	1	1	2	2	2	1	1	1	0	8	8	5	0	0	1	0	0	0	1	0	0	0	0	0	1	1
CUT045	CUT045	CUT045	0	1	1	3	0	0	18	24	52	6	0	0	0	0	0	1	2	1	0	0	0	0	2	1	0	2	1	2	0	0	2	10	24	1	0	0	0	0	0	0	2	1	0	0	0	0	2
CUT046	CUT046	CUT046	87	45	76	1512	1137	1039	1468	146	146	1052	19	498	49	102	80	293	238	349	40	102	70	161	233	372	93	77	76	1030	1150	919	127	61	66	259	259	232	174	178	209	144	220	219	154	256	154	143	192
CUT047	CUT047	CUT047	6	1	1	10	5	14	76	44	29	26	0	17	2	5	7	20	3	13	3	2	4	5	8	14	6	2	1	7	5	12	7	18	13	6	0	8	7	9	18	10	3	8	12	5	9	4	7
CUT048	CUT048	CUT048	5	2	3	5	0	2	114	37	26	8	1	4	2	1	2	6	1	5	0	2	2	3	3	5	5	3	3	3	0	2	10	15	12	2	14	2	7	2	5	3	1	3	0	5	4	3	2
CUT049	CUT049	CUT049	1	0	2	1	1	0	102	46	38	2	0	1	2	0	0	0	1	3	1	0	2	2	2	4	1	0	2	1	1	0	9	19	17	0	0	0	7	0	0	0	1	2	4	0	4	2	2
CUT050	CUT050	CUT050	3	1	2	17	17	10	144	38	39	49	1	27	5	3	6	32	6	25	5	3	2	12	16	19	3	2	2	12	17	9	12	16	18	12	14	13	18	5	16	16	6	16	19	8	4	11	13
CUT051	CUT051	CUT051	1	1	0	3	1	2	24	8	11	3	0	4	0	0	0	0	0	0	1	0	0	0	0	1	1	2	0	2	1	2	2	3	5	1	0	2	0	0	0	0	0	0	4	0	0	0	0
CUT052	CUT052	CUT052	110	56	105	181	151	142	612	131	112	346	5	263	24	44	22	220	100	149	38	40	39	120	122	184	118	96	104	123	153	126	53	55	51	85	68	123	85	77	58	108	92	94	146	101	86	107	101
CUT053	CUT053	CUT053	0	0	0	0	0	0	2	5	8	0	0	0	0	0	0	0	0	0	0	0	0	0	0	0	0	0	0	0	0	0	0	2	4	0	0	0	0	0	0	0	0	0	0	0	0	0	0
CUT054	CUT054	CUT054	2	6	5	4	4	1	70	35	47	10	0	6	0	1	1	4	5	10	0	1	1	0	8	9	2	10	5	3	4	1	6	15	21	2	0	3	0	2	3	2	5	6	0	3	2	0	7
CUT055	CUT055	CUT055	27	18	29	37	17	33	198	28	28	102	2	46	13	16	17	48	30	42	12	13	13	32	26	43	29	31	29	25	17	29	17	12	13	25	27	21	46	28	45	24	28	26	46	33	29	28	21
CUT056	CUT056	CUT056	8	2	4	0	2	1	200	50	46	17	0	30	1	2	0	15	5	8	0	1	1	4	7	13	9	3	4	0	2	1	17	21	21	4	0	14	4	3	0	7	5	5	0	3	2	4	6
CUT057	CUT057	CUT057	2	1	3	6	5	2	104	20	26	6	0	0	0	1	2	9	2	5	1	0	0	1	1	3	2	2	3	4	5	2	9	8	12	1	0	0	0	2	5	4	2	3	4	0	0	1	1
CUT058	CUT058	CUT058	3	0	0	0	1	1	12	25	14	0	0	0	0	0	0	1	1	2	0	0	0	3	1	0	3	0	0	0	1	1	1	10	6	0	0	0	0	0	0	0	1	1	0	0	0	3	1
CUT059	CUT059	CUT059	2	1	1	2	2	1	52	13	12	8	0	2	1	1	1	4	1	0	0	0	0	0	1	3	2	2	1	1	2	1	4	5	5	2	0	1	4	2	3	2	1	0	0	0	0	0	1
CUT060	CUT060	CUT060	0	0	0	2	1	0	20	8	5	3	0	1	1	0	0	0	1	0	0	0	0	1	0	1	0	0	0	1	1	0	2	3	2	1	0	0	4	0	0	0	1	0	0	0	0	1	0
CUT061	CUT061	CUT061	578	263	456	997	1250	1145	2366	491	369	1600	22	1111	72	232	153	620	779	1395	71	197	206	354	915	1207	620	449	454	679	1264	1012	204	204	168	394	300	518	255	404	401	305	719	877	273	495	453	314	754
CUT062	CUT062	CUT062	2	2	6	5	9	10	118	30	27	13	1	12	3	2	6	9	2	8	0	0	3	3	7	11	2	3	6	3	9	9	10	12	12	3	14	6	11	3	16	4	2	5	0	0	7	3	6
CUT063	CUT063	CUT063	2	0	2	2	0	1	36	10	19	8	0	4	1	2	2	3	0	2	0	1	0	1	3	2	2	0	2	1	0	1	3	4	9	2	0	2	4	3	5	1	0	1	0	3	0	1	2
CUT064	CUT064	CUT064	7	2	3	7	3	4	190	74	49	17	1	13	0	2	3	10	6	5	1	0	1	5	2	11	8	3	3	5	3	4	16	31	22	4	14	6	0	3	8	5	6	3	4	0	2	4	2
CUT065	CUT065	CUT065	6	1	6	11	6	13	180	56	68	20	0	9	1	6	3	8	11	14	1	3	3	9	10	14	6	2	6	7	6	11	16	23	31	5	0	4	4	10	8	4	10	9	4	8	7	8	8
CUT066	CUT066	CUT066	2	2	0	8	5	7	48	17	12	11	0	7	2	1	0	3	5	3	0	1	3	5	2	5	2	3	0	5	5	6	4	7	5	3	0	3	7	2	0	1	5	2	0	3	7	4	2
CUT067	CUT067	CUT067	0	0	2	1	2	1	44	21	23	7	0	8	1	1	0	4	3	2	0	0	0	1	1	3	0	0	2	1	2	1	4	9	10	2	0	4	4	2	0	2	3	1	0	0	0	1	1
CUT068	CUT068	CUT068	0	0	0	2	0	0	12	7	13	1	0	1	0	0	1	1	0	1	0	0	0	2	1	0	0	0	0	1	0	0	1	3	6	0	0	0	0	0	3	0	0	1	0	0	0	2	1
CUT069	CUT069	CUT069	0	1	2	0	0	0	44	8	9	3	1	0	0	1	0	1	0	1	0	0	0	1	1	2	0	2	2	0	0	0	4	3	4	1	14	0	0	2	0	0	0	1	0	0	0	1	1
CUT070	CUT070	CUT070	62	32	44	61	50	43	306	66	52	142	1	123	17	22	15	102	104	153	16	25	24	51	83	130	66	55	44	42	51	38	26	27	24	35	14	57	60	38	39	50	96	96	61	63	53	45	68
CUT071	CUT071	CUT071	1	0	4	2	0	3	76	31	42	7	0	5	1	2	0	6	2	2	2	0	0	4	2	4	1	0	4	1	0	3	7	13	19	2	0	2	4	3	0	3	2	1	8	0	0	4	2
CUT072	CUT072	CUT072	1	0	3	5	1	6	68	9	6	6	0	8	1	4	0	8	2	1	2	0	0	2	2	5	1	0	3	3	1	5	6	4	3	1	0	4	4	7	0	4	2	1	8	0	0	2	2
CUT073	CUT073	CUT073	15	4	4	9	9	5	128	50	61	32	2	16	1	0	2	5	9	12	0	5	1	8	14	13	16	7	4	6	9	4	11	21	28	8	27	7	4	0	5	2	8	8	0	13	2	7	12
CUT074	CUT074	CUT074	16	8	8	36	26	37	148	45	28	37	0	27	5	12	15	36	21	19	5	5	11	22	15	19	17	14	8	25	26	33	13	19	13	9	0	13	18	21	39	18	19	12	19	13	24	20	12
CUT075	CUT075	CUT075	0	0	1	1	0	0	16	8	12	0	0	0	0	0	0	2	0	1	0	0	0	0	0	2	0	0	1	1	0	0	1	3	5	0	0	0	0	0	0	1	0	1	0	0	0	0	0
CUT076	CUT076	CUT076	0	1	1	1	3	1	58	30	39	7	0	2	0	1	1	1	1	0	0	0	1	4	1	5	0	2	1	1	3	1	5	12	18	2	0	1	0	2	3	0	1	0	0	0	2	4	1
CUT077	CUT077	CUT077	32	44	63	77	39	51	216	55	57	139	1	44	14	22	9	65	51	96	7	13	23	51	73	97	34	75	63	52	39	45	19	23	26	34	14	21	50	38	24	32	47	60	27	33	51	45	60
CUT078	CUT078	CUT078	5	3	2	7	3	1	138	51	37	11	1	11	1	3	0	8	3	2	0	2	2	3	5	5	5	5	2	5	3	1	12	21	17	3	14	5	4	5	0	4	3	1	0	5	4	3	4
CUT079	CUT079	CUT079	0	0	2	0	0	0	12	11	10	0	0	0	0	0	0	2	0	1	0	0	1	1	0	0	0	0	2	0	0	0	1	5	5	0	0	0	0	0	0	1	0	1	0	0	2	1	0
CUT080	CUT080	CUT080	0	1	1	1	2	0	12	7	16	1	0	4	1	1	0	4	0	0	0	0	0	3	1	2	0	2	1	1	2	0	1	3	7	0	0	2	4	2	0	2	0	0	0	0	0	3	1
CUT081	CUT081	CUT081	0	2	1	5	0	0	52	33	52	4	0	2	1	1	0	3	2	0	0	1	0	1	0	0	0	3	1	3	0	0	4	14	24	1	0	1	4	2	0	1	2	0	0	3	0	1	0
CUT082	CUT082	CUT082	0	1	1	0	0	0	4	5	9	0	0	1	0	0	0	1	1	0	0	0	0	0	0	0	0	2	1	0	0	0	0	2	4	0	0	0	0	0	0	0	1	0	0	0	0	0	0
CUT083	CUT083	CUT083	2	2	4	2	0	0	106	21	21	7	0	4	0	0	0	2	1	1	1	0	0	0	0	2	2	3	4	1	0	0	9	9	10	2	0	2	0	0	0	1	1	1	4	0	0	0	0
CUT084	CUT084	CUT084	0	0	1	1	2	0	14	13	10	6	0	7	1	0	0	5	0	1	0	1	0	2	2	2	0	0	1	1	2	0	1	5	5	1	0	3	4	0	0	2	0	1	0	3	0	2	2
CUT085	CUT085	CUT085	4	3	6	12	13	6	198	82	84	15	0	11	0	3	0	11	5	11	1	1	5	7	5	5	4	5	6	8	13	5	17	34	38	4	0	5	0	5	0	5	5	7	4	3	11	6	4
CUT086	CUT086	CUT086	8	6	12	34	30	32	158	27	37	31	0	8	3	5	4	39	10	20	5	4	8	22	20	21	9	10	12	23	30	28	14	11	17	8	0	4	11	9	10	19	9	13	19	10	18	20	16
CUT087	CUT087	CUT087	32	10	32	65	76	72	952	169	140	174	2	98	10	11	7	46	28	54	2	14	3	37	33	44	34	17	32	44	77	64	82	70	64	43	27	46	35	19	18	23	26	34	8	35	7	33	27
CUT088	CUT088	CUT088	0	3	2	11	10	8	62	35	32	17	0	3	1	1	1	5	6	4	2	3	1	5	3	9	0	5	2	7	10	7	5	15	15	4	0	1	4	2	3	2	6	3	8	8	2	4	2
CUT089	CUT089	CUT089	9	1	3	14	13	12	160	48	30	41	1	17	2	2	1	21	18	19	0	8	0	6	11	16	10	2	3	10	13	11	14	20	14	10	14	8	7	3	3	10	17	12	0	20	0	5	9
CUT090	CUT090	CUT090	208	82	177	195	178	218	3638	329	385	1245	17	643	31	85	56	220	190	242	25	61	48	128	162	262	223	140	176	133	180	193	314	137	175	307	232	300	110	148	147	108	175	152	96	153	106	114	134
CUT091	CUT091	CUT091	12	2	16	99	77	69	468	52	65	56	1	47	5	7	7	23	30	32	2	4	11	31	25	22	13	3	16	67	78	61	40	22	30	14	14	22	18	12	18	11	28	20	8	10	24	28	21
CUT092	CUT092	CUT092	2	0	3	0	1	2	94	34	41	5	0	3	0	0	0	8	0	2	0	0	0	1	1	2	2	0	3	0	1	2	8	14	19	1	0	1	0	0	0	4	0	1	0	0	0	1	1
CUT093	CUT093	CUT093	144	55	85	105	51	53	654	165	123	416	12	276	12	27	24	156	70	125	18	27	36	90	112	161	154	94	85	72	52	47	56	69	56	103	164	129	43	47	63	77	65	79	69	68	79	80	92
CUT094	CUT094	CUT094	1	2	1	0	1	1	28	30	32	6	0	1	0	0	1	5	1	2	0	0	1	3	3	4	1	3	1	0	1	1	2	12	15	1	0	0	0	0	3	2	1	1	0	0	2	3	2
CUT095	CUT095	CUT095	0	0	0	2	1	3	36	10	18	3	0	0	1	0	0	0	0	2	0	0	0	1	0	0	0	0	0	1	1	3	3	4	8	1	0	0	4	0	0	0	0	1	0	0	0	1	0
CUT096	CUT096	CUT096	10	4	7	19	15	10	116	20	29	43	1	46	2	4	3	12	7	6	2	1	1	11	7	12	11	7	7	13	15	9	10	8	13	11	14	21	7	7	8	6	6	4	8	3	2	10	6
CUT097	CUT097	CUT097	2	0	2	3	6	5	74	16	12	24	0	5	2	5	0	12	6	9	0	2	4	3	3	4	2	0	2	2	6	4	6	7	5	6	0	2	7	9	0	6	6	6	0	5	9	3	2
CUT098	CUT098	CUT098	0	0	2	2	1	1	56	26	19	3	0	2	0	1	0	5	3	2	1	0	1	2	1	6	0	0	2	1	1	1	5	11	9	1	0	1	0	2	0	2	3	1	4	0	2	2	1
CUT099	CUT099	CUT099	4	0	3	6	4	0	46	8	13	9	2	2	1	2	4	2	2	0	0	0	2	1	4	3	4	0	3	4	4	0	4	3	6	2	27	1	4	3	10	1	2	0	0	0	4	1	3
CUT100	CUT100	CUT100	3	2	4	18	6	4	86	15	14	27	2	13	6	2	4	13	6	8	2	4	4	8	7	11	3	3	4	12	6	4	7	6	6	7	27	6	21	3	10	6	6	5	8	10	9	7	6
CUT101	CUT101	CUT101	0	0	0	1	0	0	18	9	5	0	0	0	0	0	0	0	0	0	0	0	0	1	0	0	0	0	0	1	0	0	2	4	2	0	0	0	0	0	0	0	0	0	0	0	0	1	0
CUT102	CUT102	CUT102	3	0	0	4	1	3	166	17	18	13	0	6	0	0	1	9	3	5	0	2	1	1	2	5	3	0	0	3	1	3	14	7	8	3	0	3	0	0	3	4	3	3	0	5	2	1	2
CUT103	CUT103	CUT103	2	2	2	6	7	10	84	32	23	8	1	8	0	0	1	2	5	8	0	3	3	2	4	7	2	3	2	4	7	9	7	13	10	2	14	4	0	0	3	1	5	5	0	8	7	2	3
CUT104	CUT104	CUT104	3	0	0	0	1	0	26	5	0	8	0	3	0	2	0	5	2	1	0	1	1	0	1	1	3	0	0	0	1	0	2	2	0	2	0	1	0	3	0	2	2	1	0	3	2	0	1
CUT105	CUT105	CUT105	10	3	14	28	10	21	112	52	52	41	1	35	3	6	3	20	19	14	4	2	4	15	10	18	11	5	14	19	10	19	10	22	24	10	14	16	11	10	8	10	18	9	15	5	9	13	8
CUT106	CUT106	CUT106	1	1	3	15	4	9	192	56	56	21	2	20	3	3	0	10	6	8	1	0	0	8	11	11	1	2	3	10	4	8	17	23	25	5	27	9	11	5	0	5	6	5	4	0	0	7	9
CUT107	CUT107	CUT107	0	1	1	0	0	1	10	7	2	2	0	0	0	0	1	1	0	0	0	2	0	2	0	2	0	2	1	0	0	1	1	3	1	0	0	0	0	0	3	0	0	0	0	5	0	2	0
CUT108	CUT108	CUT108	0	0	1	0	1	1	14	16	19	5	0	1	1	1	0	1	0	0	0	0	0	1	0	3	0	0	1	0	1	1	1	7	9	1	0	0	4	2	0	0	0	0	0	0	0	1	0
CUT109	CUT109	CUT109	0	3	2	1	0	0	38	30	43	4	0	1	0	0	0	2	1	2	0	0	0	1	0	5	0	5	2	1	0	0	3	12	20	1	0	0	0	0	0	1	1	1	0	0	0	1	0
CUT110	CUT110	CUT110	0	0	3	2	0	0	26	41	30	1	0	2	0	1	0	1	1	3	2	0	0	1	1	2	0	0	3	1	0	0	2	17	14	0	0	1	0	2	0	0	1	2	8	0	0	1	1
CUT111	CUT111	CUT111	1	0	5	10	0	2	56	16	33	3	0	1	0	3	0	4	2	2	1	0	0	2	4	0	1	0	5	7	0	2	5	7	15	1	0	0	0	5	0	2	2	1	4	0	0	2	3
CUT112	CUT112	CUT112	0	0	1	1	0	0	30	5	14	0	0	0	0	0	0	3	2	1	0	0	0	0	0	0	0	0	1	1	0	0	3	2	6	0	0	0	0	0	0	1	2	1	0	0	0	0	0
CUT113	CUT113	CUT113	35	17	38	173	215	181	486	102	106	197	4	193	14	27	23	70	46	80	14	25	20	40	78	109	38	29	38	118	217	160	42	42	48	49	55	90	50	47	60	34	42	50	54	63	44	36	64
CUT114	CUT114	CUT114	0	0	1	3	1	3	66	24	25	8	0	5	0	1	0	3	1	0	0	0	1	2	0	1	0	0	1	2	1	3	6	10	11	2	0	2	0	2	0	1	1	0	0	0	2	2	0
CUT115	CUT115	CUT115	1	0	1	1	0	0	30	7	11	2	0	1	1	1	1	2	1	1	0	0	1	0	0	0	1	0	1	1	0	0	3	3	5	0	0	0	4	2	3	1	1	1	0	0	2	0	0
CUT116	CUT116	CUT116	0	0	1	0	0	0	8	7	17	1	0	0	0	0	0	1	1	0	0	1	1	0	0	0	0	0	1	0	0	0	1	3	8	0	0	0	0	0	0	0	1	0	0	3	2	0	0
CUT117	CUT117	CUT117	1	0	2	0	0	1	26	11	12	2	1	3	1	1	0	0	0	0	0	0	1	2	0	2	1	0	2	0	0	1	2	5	5	0	14	1	4	2	0	0	0	0	0	0	2	2	0
CUT118	CUT118	CUT118	1	4	4	3	2	5	142	41	57	15	0	6	1	2	1	6	4	5	1	1	1	5	2	6	1	7	4	2	2	4	12	17	26	4	0	3	4	3	3	3	4	3	4	3	2	4	2
CUT119	CUT119	CUT119	0	0	1	12	3	8	46	22	18	3	0	1	2	3	2	5	1	1	2	1	2	1	2	1	0	0	1	8	3	7	4	9	8	1	0	0	7	5	5	2	1	1	8	3	4	1	2
CUT120	CUT120	CUT120	0	0	0	0	0	0	10	3	9	2	0	1	0	0	0	1	0	0	1	0	0	0	0	1	0	0	0	0	0	0	1	1	4	0	0	0	0	0	0	0	0	0	4	0	0	0	0
CUT121	CUT121	CUT121	1	1	0	3	1	0	38	18	31	1	0	2	0	0	0	2	2	0	0	1	1	0	0	1	1	2	0	2	1	0	3	7	14	0	0	1	0	0	0	1	2	0	0	3	2	0	0
CUT122	CUT122	CUT122	2	0	1	3	3	0	120	18	79	51	1	47	0	2	1	4	4	2	0	0	2	4	5	12	2	0	1	2	3	0	10	7	36	13	14	22	0	3	3	2	4	1	0	0	4	4	4
CUT123	CUT123	CUT123	1	0	2	12	5	3	86	11	14	18	1	14	2	1	2	8	3	6	1	1	2	1	1	3	1	0	2	8	5	3	7	5	6	4	14	7	7	2	5	4	3	4	4	3	4	1	1
CUT124	CUT124	CUT124	7	1	3	9	9	6	74	24	34	16	0	13	1	2	2	16	7	8	1	3	1	4	6	8	8	2	3	6	9	5	6	10	15	4	0	6	4	3	5	8	6	5	4	8	2	4	5
CUT125	CUT125	CUT125	7	1	2	12	10	14	86	25	17	22	0	11	1	6	2	14	5	6	1	3	3	1	7	7	8	2	2	8	10	12	7	10	8	5	0	5	4	10	5	7	5	4	4	8	7	1	6
CUT126	CUT126	CUT126	3	1	2	13	12	13	86	28	39	13	0	14	5	3	1	2	2	8	0	3	2	6	4	6	3	2	2	9	12	11	7	12	18	3	0	7	18	5	3	1	2	5	0	8	4	5	3
CUT127	CUT127	CUT127	3	4	4	4	11	4	94	13	13	13	0	18	1	5	3	9	7	6	0	2	3	5	6	9	3	7	4	3	11	4	8	5	6	3	0	8	4	9	8	4	6	4	0	5	7	4	5
CUT128	CUT128	CUT128	6	1	5	9	3	1	54	15	17	18	1	6	0	2	0	3	3	3	0	0	2	1	2	4	6	2	5	6	3	1	5	6	8	4	14	3	0	3	0	1	3	2	0	0	4	1	2
CUT129	CUT129	CUT129	1	2	0	7	2	0	56	27	21	5	0	6	2	1	0	5	1	0	0	1	0	3	2	4	1	3	0	5	2	0	5	11	10	1	0	3	7	2	0	2	1	0	0	3	0	3	2
CUT130	CUT130	CUT130	0	0	0	4	0	0	38	13	19	4	0	0	0	1	1	0	0	0	0	1	2	2	1	5	0	0	0	3	0	0	3	5	9	1	0	0	0	2	3	0	0	0	0	3	4	2	1
CUT131	CUT131	CUT131	19	17	16	44	40	29	88	26	20	74	1	33	5	17	8	40	25	41	6	10	20	24	28	51	20	29	16	30	40	26	8	11	9	18	14	15	18	30	21	20	23	26	23	25	44	21	23
CUT132	CUT132	CUT132	16	4	5	3	2	4	74	16	8	37	1	7	1	2	2	16	5	17	0	2	4	9	13	14	17	7	5	2	2	4	6	7	4	9	14	3	4	3	5	8	5	11	0	5	9	8	11
CUT133	CUT133	CUT133	0	1	2	5	1	1	42	32	33	2	0	0	0	4	0	2	3	4	0	0	0	3	0	5	0	2	2	3	1	1	4	13	15	0	0	0	0	7	0	1	3	3	0	0	0	3	0
CUT134	CUT134	CUT134	1	1	0	1	0	1	38	23	29	4	0	3	0	1	0	5	0	1	0	1	0	2	0	4	1	2	0	1	0	1	3	10	13	1	0	1	0	2	0	2	0	1	0	3	0	2	0
CUT135	CUT135	CUT135	3	3	3	17	6	11	100	49	44	12	0	4	2	1	0	13	10	4	2	2	2	4	7	11	3	5	3	12	6	10	9	20	20	3	0	2	7	2	0	6	9	3	8	5	4	4	6
CUT136	CUT136	CUT136	5	2	8	23	7	14	128	30	30	21	0	10	3	6	1	14	3	7	2	1	3	6	5	6	5	3	8	16	7	12	11	12	14	5	0	5	11	10	3	7	3	4	8	3	7	5	4
CUT137	CUT137	CUT137	0	0	7	1	0	0	44	18	21	5	0	6	0	1	0	5	2	0	1	0	0	0	0	3	0	0	7	1	0	0	4	7	10	1	0	3	0	2	0	2	2	0	4	0	0	0	0
CUT138	CUT138	CUT138	0	0	3	0	0	0	20	11	15	2	0	0	0	1	0	2	0	0	0	0	0	0	0	0	0	0	3	0	0	0	2	5	7	0	0	0	0	2	0	1	0	0	0	0	0	0	0
CUT139	CUT139	CUT139	10	3	5	18	8	14	204	27	33	27	1	23	4	4	5	15	10	17	2	3	6	11	11	16	11	5	5	12	8	12	18	11	15	7	14	11	14	7	13	7	9	11	8	8	13	10	9
CUT140	CUT140	CUT140	0	0	0	0	0	1	14	9	9	2	0	0	0	0	0	0	0	1	1	0	0	0	0	0	0	0	0	0	0	1	1	4	4	0	0	0	0	0	0	0	0	1	4	0	0	0	0
CUT141	CUT141	CUT141	57	30	59	61	86	67	370	76	72	191	4	120	9	27	18	86	73	107	10	22	27	40	79	131	61	51	59	42	87	59	32	32	33	47	55	56	32	47	47	42	67	67	38	55	59	36	65
CUT142	CUT142	CUT142	0	2	1	1	2	3	42	8	18	5	0	0	2	1	0	3	0	3	0	0	0	2	3	0	0	3	1	1	2	3	4	3	8	1	0	0	7	2	0	1	0	2	0	0	0	2	2
CUT143	CUT143	CUT143	0	2	6	10	0	4	206	95	113	14	0	10	1	1	1	12	0	2	1	2	0	13	3	4	0	3	6	7	0	4	18	40	51	3	0	5	4	2	3	6	0	1	4	5	0	12	2
CUT144	CUT144	CUT144	1	3	1	3	6	1	88	30	35	3	0	5	1	0	0	4	7	2	1	1	1	3	1	2	1	5	1	2	6	1	8	12	16	1	0	2	4	0	0	2	6	1	4	3	2	3	1
CUT145	CUT145	CUT145	0	0	1	5	2	2	44	23	31	3	0	4	1	0	0	0	1	2	0	0	0	3	2	1	0	0	1	3	2	2	4	10	14	1	0	2	4	0	0	0	1	1	0	0	0	3	2
CUT146	CUT146	CUT146	6	2	15	7	1	4	262	50	83	57	0	24	4	2	4	12	6	7	3	3	0	6	10	11	6	3	15	5	1	4	23	21	38	14	0	11	14	3	10	6	6	4	12	8	0	5	8
CUT147	CUT147	CUT147	9	5	17	13	2	9	182	32	31	74	0	33	2	6	3	17	6	9	5	3	1	9	7	11	10	9	17	9	2	8	16	13	14	18	0	15	7	10	8	8	6	6	19	8	2	8	6
CUT148	CUT148	CUT148	23	13	20	33	30	17	606	146	109	60	1	59	1	14	6	22	28	16	1	5	11	10	19	30	25	22	20	22	30	15	52	61	50	15	14	28	4	24	16	11	26	10	4	13	24	9	16
CUT149	CUT149	CUT149	6	3	8	3	5	9	222	64	53	17	0	10	3	3	2	11	5	5	1	3	1	4	8	8	6	5	8	2	5	8	19	27	24	4	0	5	11	5	5	5	5	3	4	8	2	4	7
CUT150	CUT150	CUT150	1	5	14	7	0	1	66	34	66	10	0	19	1	1	0	8	5	4	2	0	0	6	2	4	1	9	14	5	0	1	6	14	30	2	0	9	4	2	0	4	5	3	8	0	0	5	2
CUT151	CUT151	CUT151	4	6	3	25	15	21	142	31	41	27	0	12	6	9	9	13	13	12	3	7	7	5	5	14	4	10	3	17	15	19	12	13	19	7	0	6	21	16	24	6	12	8	12	18	15	4	4
CUT152	CUT152	CUT152	0	0	0	2	0	3	12	11	11	0	0	0	1	0	0	1	0	3	0	0	0	1	2	1	0	0	0	1	0	3	1	5	5	0	0	0	4	0	0	0	0	2	0	0	0	1	2
CUT153	CUT153	CUT153	1	0	0	2	2	2	34	16	42	7	0	2	0	5	0	4	5	7	1	1	2	3	2	6	1	0	0	1	2	2	3	7	19	2	0	1	0	9	0	2	5	4	4	3	4	3	2
CUT154	CUT154	CUT154	4	1	1	11	11	7	56	11	9	22	0	15	4	1	2	18	10	5	4	2	3	4	7	15	4	2	1	7	11	6	5	5	4	5	0	7	14	2	5	9	9	3	15	5	7	4	6
CUT155	CUT155	CUT155	9	2	8	5	5	12	88	16	19	36	0	4	1	2	1	20	12	21	0	1	2	1	11	19	10	3	8	3	5	11	8	7	9	9	0	2	4	3	3	10	11	13	0	3	4	1	9
CUT156	CUT156	CUT156	0	5	7	22	10	19	154	49	64	31	0	19	1	6	2	7	4	10	3	5	3	1	8	6	0	9	7	15	10	17	13	20	29	8	0	9	4	10	5	3	4	6	12	13	7	1	7
CUT157	CUT157	CUT157	1	1	1	4	4	2	84	18	25	18	0	5	2	3	0	3	4	8	1	1	0	2	4	5	1	2	1	3	4	2	7	7	11	4	0	2	7	5	0	1	4	5	4	3	0	2	3
CUT158	CUT158	CUT158	3	5	2	33	12	8	68	11	3	5	1	9	4	5	4	12	6	15	3	2	2	10	5	16	3	9	2	22	12	7	6	5	1	1	14	4	14	9	10	6	6	9	12	5	4	9	4
CUT159	CUT159	CUT159	1	2	6	15	13	9	204	25	27	17	0	6	2	2	4	14	5	6	2	3	3	7	4	5	1	3	6	10	13	8	18	10	12	4	0	3	7	3	10	7	5	4	8	8	7	6	3
CUT160	CUT160	CUT160	1	1	3	2	1	5	102	24	31	16	0	3	0	0	0	8	1	2	0	1	2	4	6	5	1	2	3	1	1	4	9	10	14	4	0	1	0	0	0	4	1	1	0	3	4	4	5
CUT161	CUT161	CUT161	5	4	5	9	5	7	64	3	8	31	0	8	3	2	1	16	5	8	1	0	5	12	5	5	5	7	5	6	5	6	6	1	4	8	0	4	11	3	3	8	5	5	4	0	11	11	4
CUT162	CUT162	CUT162	36	7	27	20	35	29	460	68	72	274	3	60	2	9	5	21	24	64	2	5	8	14	37	56	39	12	27	14	35	26	40	28	33	68	41	28	7	16	13	10	22	40	8	13	18	12	31
CUT163	CUT163	CUT163	1	3	2	9	4	8	48	23	25	11	0	4	1	1	2	2	4	8	0	2	2	1	7	8	1	5	2	6	4	7	4	10	11	3	0	2	4	2	5	1	4	5	0	5	4	1	6
CUT164	CUT164	CUT164	0	0	1	0	0	1	22	35	29	1	0	1	0	1	1	2	0	3	0	1	1	1	2	0	0	0	1	0	0	1	2	15	13	0	0	0	0	2	3	1	0	2	0	3	2	1	2
CUT165	CUT165	CUT165	3	2	6	11	35	25	102	16	16	35	0	10	2	3	1	12	5	7	1	5	4	9	12	7	3	3	6	7	35	22	9	7	7	9	0	5	7	5	3	6	5	4	4	13	9	8	10
CUT166	CUT166	CUT166	14	2	8	3	0	4	96	17	17	29	1	16	0	3	2	19	10	17	1	2	0	2	9	23	15	3	8	2	0	4	8	7	8	7	14	7	0	5	5	9	9	11	4	5	0	2	7
CUT167	CUT167	CUT167	0	0	1	3	4	0	86	34	27	14	0	10	1	1	0	8	0	2	0	1	0	2	0	5	0	0	1	2	4	0	7	14	12	3	0	5	4	2	0	4	0	1	0	3	0	2	0
CUT168	CUT168	CUT168	0	0	0	0	0	0	10	2	9	2	0	0	0	0	0	1	0	2	0	0	0	0	0	0	0	0	0	0	0	0	1	1	4	0	0	0	0	0	0	0	0	1	0	0	0	0	0
CUT169	CUT169	CUT169	1	0	1	6	3	4	40	10	17	19	0	7	4	2	1	10	1	8	0	1	0	1	5	7	1	0	1	4	3	4	3	4	8	5	0	3	14	3	3	5	1	5	0	3	0	1	4
CUT170	CUT170	CUT170	1	1	2	0	0	0	56	16	14	6	0	4	0	0	0	4	1	0	0	0	0	0	0	4	1	2	2	0	0	0	5	7	6	1	0	2	0	0	0	2	1	0	0	0	0	0	0
CUT171	CUT171	CUT171	18	2	13	13	11	20	588	120	132	98	1	51	2	12	4	29	21	35	1	10	5	5	22	31	19	3	13	9	11	18	51	50	60	24	14	24	7	21	10	14	19	22	4	25	11	4	18
CUT172	CUT172	CUT172	1	0	3	6	2	6	28	10	4	9	0	5	2	3	4	9	4	3	1	0	5	5	4	6	1	0	3	4	2	5	2	4	2	2	0	2	7	5	10	4	4	2	4	0	11	4	3
CUT173	CUT173	CUT173	2	0	0	2	1	6	32	36	21	9	0	0	0	2	0	3	1	2	0	3	1	2	2	5	2	0	0	1	1	5	3	15	10	2	0	0	0	3	0	1	1	1	0	8	2	2	2
CUT174	CUT174	CUT174	2	2	1	2	1	1	52	6	6	5	0	6	0	1	1	2	1	4	2	1	0	1	3	4	2	3	1	1	1	1	4	2	3	1	0	3	0	2	3	1	1	3	8	3	0	1	2
CUT175	CUT175	CUT175	1	6	2	4	0	1	104	61	62	1	0	5	0	1	0	6	3	2	2	0	0	1	3	4	1	10	2	3	0	1	9	25	28	0	0	2	0	2	0	3	3	1	8	0	0	1	2
CUT176	CUT176	CUT176	0	3	1	1	0	0	2	7	3	0	0	0	0	0	0	0	1	0	0	0	0	0	0	1	0	5	1	1	0	0	0	3	1	0	0	0	0	0	0	0	1	0	0	0	0	0	0
CUT177	CUT177	CUT177	2	0	2	3	0	3	14	12	19	2	0	1	0	0	0	1	1	3	0	0	0	0	0	1	2	0	2	2	0	3	1	5	9	0	0	0	0	0	0	0	1	2	0	0	0	0	0
CUT178	CUT178	CUT178	2	0	2	2	2	3	40	24	30	5	0	2	2	1	0	2	1	1	0	1	1	3	2	1	2	0	2	1	2	3	3	10	14	1	0	1	7	2	0	1	1	1	0	3	2	3	2
CUT179	CUT179	CUT179	0	2	1	1	1	1	30	17	21	4	0	1	0	0	1	2	1	2	0	0	0	0	1	2	0	3	1	1	1	1	3	7	10	1	0	0	0	0	3	1	1	1	0	0	0	0	1
CUT180	CUT180	CUT180	0	1	1	3	3	1	44	11	13	9	0	11	1	1	0	9	0	1	0	2	1	2	4	4	0	2	1	2	3	1	4	5	6	2	0	5	4	2	0	4	0	1	0	5	2	2	3
CUT181	CUT181	CUT181	1	1	2	9	11	13	86	21	24	38	2	17	1	8	3	23	9	13	4	5	6	13	16	29	1	2	2	6	11	11	7	9	11	9	27	8	4	14	8	11	8	8	15	13	13	12	13
CUT182	CUT182	CUT182	3	0	5	3	6	3	228	47	37	25	1	10	0	3	1	6	6	4	2	0	1	2	3	10	3	0	5	2	6	3	20	20	17	6	14	5	0	5	3	3	6	3	8	0	2	2	2
CUT183	CUT183	CUT183	3	2	1	7	2	0	44	17	15	16	0	4	2	1	0	2	2	6	0	0	1	2	2	2	3	3	1	5	2	0	4	7	7	4	0	2	7	2	0	1	2	4	0	0	2	2	2
CUT184	CUT184	CUT184	1	1	0	6	1	0	44	7	3	13	0	4	1	1	0	3	2	5	0	0	2	2	1	1	1	2	0	4	1	0	4	3	1	3	0	2	4	2	0	1	2	3	0	0	4	2	1
CUT185	CUT185	CUT185	1	1	2	8	4	5	56	7	4	38	0	25	4	7	6	32	14	8	3	10	2	16	8	16	1	2	2	5	4	4	5	3	2	9	0	12	14	12	16	16	13	5	12	25	4	14	7
CUT186	CUT186	CUT186	0	0	1	3	1	2	36	11	12	3	0	4	0	3	0	0	2	2	1	2	2	1	2	2	0	0	1	2	1	2	3	5	5	1	0	2	0	5	0	0	2	1	4	5	4	1	2
CUT187	CUT187	CUT187	1	0	0	0	0	0	18	9	9	1	0	1	0	0	0	0	2	1	0	2	1	0	0	1	1	0	0	0	0	0	2	4	4	0	0	0	0	0	0	0	2	1	0	5	2	0	0
CUT188	CUT188	CUT188	0	0	0	0	0	1	14	11	22	0	0	0	0	0	0	1	0	0	0	0	0	0	0	0	0	0	0	0	0	1	1	5	10	0	0	0	0	0	0	0	0	0	0	0	0	0	0
CUT189	CUT189	CUT189	1	0	2	6	2	6	120	30	45	15	0	7	0	0	2	7	0	5	1	0	0	4	4	5	1	0	2	4	2	5	10	12	20	4	0	3	0	0	5	3	0	3	4	0	0	4	3
CUT190	CUT190	CUT190	11	1	1	4	4	6	44	9	5	40	0	11	0	3	2	12	6	13	0	0	3	9	9	13	12	2	1	3	4	5	4	4	2	10	0	5	0	5	5	6	6	8	0	0	7	8	7
CUT191	CUT191	CUT191	1	2	2	2	1	1	86	25	30	7	0	5	2	0	1	4	2	2	0	1	0	3	3	7	1	3	2	1	1	1	7	10	14	2	0	2	7	0	3	2	2	1	0	3	0	3	2
CUT192	CUT192	CUT192	0	0	1	0	0	0	26	9	9	0	0	0	1	1	0	0	0	1	0	0	0	2	0	2	0	0	1	0	0	0	2	4	4	0	0	0	4	2	0	0	0	1	0	0	0	2	0
CUT193	CUT193	CUT193	8	12	7	23	10	15	88	5	3	29	0	36	2	9	6	28	15	24	1	2	3	19	11	20	9	21	7	16	10	13	8	2	1	7	0	17	7	16	16	14	14	15	4	5	7	17	9
CUT194	CUT194	CUT194	0	0	1	0	1	1	32	12	19	1	0	0	0	0	0	2	2	0	1	0	0	0	0	2	0	0	1	0	1	1	3	5	9	0	0	0	0	0	0	1	2	0	4	0	0	0	0
CUT195	CUT195	CUT195	0	0	6	2	0	1	36	5	13	3	0	0	0	0	3	2	1	1	0	2	0	4	1	2	0	0	6	1	0	1	3	2	6	1	0	0	0	0	8	1	1	1	0	5	0	4	1
CUT196	CUT196	CUT196	0	1	2	1	3	3	48	12	14	19	0	7	1	4	6	11	6	4	1	1	2	3	4	13	0	2	2	1	3	3	4	5	6	5	0	3	4	7	16	5	6	3	4	3	4	3	3
CUT197	CUT197	CUT197	3	2	5	3	7	3	74	75	73	8	0	4	1	2	1	3	2	3	1	1	1	7	2	8	3	3	5	2	7	3	6	31	33	2	0	2	4	3	3	1	2	2	4	3	2	6	2
CUT198	CUT198	CUT198	3	0	2	3	4	3	44	19	17	10	0	9	2	2	2	5	4	5	0	1	3	2	1	6	3	0	2	2	4	3	4	8	8	2	0	4	7	3	5	2	4	3	0	3	7	2	1
CUT199	CUT199	CUT199	0	0	3	9	7	9	78	29	37	15	1	6	5	2	1	7	2	2	3	2	3	3	10	5	0	0	3	6	7	8	7	12	17	4	14	3	18	3	3	3	2	1	12	5	7	3	8
CUT200	CUT200	CUT200	2	4	3	2	0	0	64	50	70	2	0	0	1	2	0	6	3	1	0	0	1	2	6	3	2	7	3	1	0	0	6	21	32	0	0	0	4	3	0	3	3	1	0	0	2	2	5
CUT201	CUT201	CUT201	0	2	0	1	0	0	6	8	7	0	0	0	1	0	0	3	1	1	0	0	0	0	0	3	0	3	0	1	0	0	1	3	3	0	0	0	4	0	0	1	1	1	0	0	0	0	0
CUT202	CUT202	CUT202	12	8	14	76	93	78	50	18	20	90	1	21	4	5	5	18	17	37	7	8	9	15	27	40	13	14	14	52	94	69	4	7	9	22	14	10	14	9	13	9	16	23	27	20	20	13	22
CUT203	CUT203	CUT203	2	1	0	7	6	12	44	8	7	16	0	4	0	1	1	3	3	5	0	1	0	3	0	8	2	2	0	5	6	11	4	3	3	4	0	2	0	2	3	1	3	3	0	3	0	3	0
CUT204	CUT204	CUT204	0	2	0	2	5	4	24	13	18	14	0	4	2	0	1	4	3	2	0	1	0	1	2	5	0	3	0	1	5	4	2	5	8	3	0	2	7	0	3	2	3	1	0	3	0	1	2
CUT205	CUT205	CUT205	21	12	12	38	13	20	456	148	144	60	3	51	4	4	5	24	19	18	2	10	6	19	19	20	23	21	12	26	13	18	39	62	65	15	41	24	14	7	13	12	18	11	8	25	13	17	16
CUT206	CUT206	CUT206	0	0	0	4	4	9	62	28	39	1	0	12	4	0	0	7	1	0	1	1	1	1	1	3	0	0	0	3	4	8	5	12	18	0	0	6	14	0	0	3	1	0	4	3	2	1	1
CUT207	CUT207	CUT207	0	2	0	1	2	0	26	4	7	5	0	0	2	1	0	3	0	1	1	0	0	1	0	2	0	3	0	1	2	0	2	2	3	1	0	0	7	2	0	1	0	1	4	0	0	1	0
CUT208	CUT208	CUT208	3	4	4	17	12	9	54	10	3	9	0	9	0	0	1	4	5	6	0	1	0	4	3	6	3	7	4	12	12	8	5	4	1	2	0	4	0	0	3	2	5	4	0	3	0	4	2
CUT209	CUT209	CUT209	1	1	0	2	6	5	80	37	32	5	1	4	0	3	3	3	1	3	1	1	3	2	3	4	1	2	0	1	6	4	7	15	15	1	14	2	0	5	8	1	1	2	4	3	7	2	2
CUT210	CUT210	CUT210	2	1	3	2	7	6	116	37	42	9	1	9	0	2	3	12	2	2	1	0	3	3	7	5	2	2	3	1	7	5	10	15	19	2	14	4	0	3	8	6	2	1	4	0	7	3	6
CUT211	CUT211	CUT211	0	0	1	5	1	1	78	52	55	5	0	2	1	2	2	4	2	2	0	1	1	1	4	5	0	0	1	3	1	1	7	22	25	1	0	1	4	3	5	2	2	1	0	3	2	1	3
CUT212	CUT212	CUT212	2	0	3	3	3	3	32	9	7	8	1	12	2	3	0	1	0	2	1	2	1	5	2	7	2	0	3	2	3	3	3	4	3	2	14	6	7	5	0	0	0	1	4	5	2	4	2
CUT213	CUT213	CUT213	1	2	2	0	2	2	86	20	30	2	0	0	0	0	0	0	0	1	1	0	0	0	0	0	1	3	2	0	2	2	7	8	14	0	0	0	0	0	0	0	0	1	4	0	0	0	0
CUT214	CUT214	CUT214	0	1	1	0	0	3	56	14	15	2	0	0	0	1	1	0	1	1	1	1	0	0	0	0	0	2	1	0	0	3	5	6	7	0	0	0	0	2	3	0	1	1	4	3	0	0	0
CUT215	CUT215	CUT215	0	0	0	0	0	0	2	3	6	0	0	0	1	0	0	0	1	0	0	0	0	0	0	0	0	0	0	0	0	0	0	1	3	0	0	0	4	0	0	0	1	0	0	0	0	0	0
CUT216	CUT216	CUT216	0	1	1	3	2	1	112	36	25	12	0	6	2	1	1	7	2	4	0	0	0	1	2	5	0	2	1	2	2	1	10	15	11	3	0	3	7	2	3	3	2	3	0	0	0	1	2
CUT217	CUT217	CUT217	3	0	3	2	0	0	136	22	12	7	1	1	0	0	0	4	0	0	0	0	0	1	0	3	3	0	3	1	0	0	12	9	5	2	14	0	0	0	0	2	0	0	0	0	0	1	0
CUT218	CUT218	CUT218	1	0	0	0	0	0	46	27	31	2	0	2	0	0	0	4	0	2	0	0	1	0	2	1	1	0	0	0	0	0	4	11	14	0	0	1	0	0	0	2	0	1	0	0	2	0	2
CUT219	CUT219	CUT219	41	11	37	59	44	55	250	84	83	122	2	18	7	8	17	21	20	44	5	23	7	27	19	37	44	19	37	40	45	49	22	35	38	30	27	8	25	14	45	10	18	28	19	58	15	24	16
CUT220	CUT220	CUT220	3	0	8	22	17	13	108	15	15	21	2	15	3	4	2	14	7	6	3	2	6	16	13	9	3	0	8	15	17	11	9	6	7	5	27	7	11	7	5	7	6	4	12	5	13	14	11
CUT221	CUT221	CUT221	0	5	4	1	0	3	108	48	105	0	0	5	3	1	4	18	8	11	3	3	1	10	7	12	0	9	4	1	0	3	9	20	48	0	0	2	11	2	10	9	7	7	12	8	2	9	6
CUT222	CUT222	CUT222	0	1	0	2	1	2	18	12	20	0	0	1	1	1	1	2	0	1	1	0	0	1	0	0	0	2	0	1	1	2	2	5	9	0	0	0	4	2	3	1	0	1	4	0	0	1	0
CUT223	CUT223	CUT223	0	1	1	2	2	2	18	4	5	1	0	0	0	1	1	2	0	1	0	0	0	0	0	0	0	2	1	1	2	2	2	2	2	0	0	0	0	2	3	1	0	1	0	0	0	0	0
CUT224	CUT224	CUT224	16	6	16	18	14	17	126	12	27	48	0	36	5	5	4	22	13	6	2	4	6	8	8	21	17	10	16	12	14	15	11	5	12	12	0	17	18	9	10	11	12	4	8	10	13	7	7
CUT225	CUT225	CUT225	1	0	0	0	1	0	14	18	18	1	0	1	0	0	0	1	0	2	0	1	0	0	0	2	1	0	0	0	1	0	1	7	8	0	0	0	0	0	0	0	0	1	0	3	0	0	0
CUT226	CUT226	CUT226	7	9	15	11	2	2	274	136	181	30	2	19	1	2	1	17	5	4	2	0	0	12	4	12	8	15	15	7	2	2	24	57	82	7	27	9	4	3	3	8	5	3	8	0	0	11	3
CUT227	CUT227	CUT227	25	29	56	190	230	171	996	214	159	145	6	86	17	22	10	126	82	163	9	26	35	43	113	149	27	50	56	129	233	151	86	89	72	36	82	40	60	38	26	62	76	102	35	65	77	38	93
CUT228	CUT228	CUT228	1	1	2	1	3	5	74	34	26	5	0	6	0	2	1	3	5	2	2	1	1	2	2	3	1	2	2	1	3	4	6	14	12	1	0	3	0	3	3	1	5	1	8	3	2	2	2
CUT229	CUT229	CUT229	0	4	3	3	4	2	58	30	33	2	0	2	1	1	0	3	2	1	0	2	1	1	0	5	0	7	3	2	4	2	5	12	15	0	0	1	4	2	0	1	2	1	0	5	2	1	0
CUT230	CUT230	CUT230	0	1	0	0	0	0	6	8	14	2	1	1	0	0	0	4	0	0	0	0	0	1	0	2	0	2	0	0	0	0	1	3	6	0	14	0	0	0	0	2	0	0	0	0	0	1	0
CUT231	CUT231	CUT231	1	1	1	3	1	0	34	45	68	0	0	1	0	1	0	3	3	2	0	0	0	1	2	5	1	2	1	2	1	0	3	19	31	0	0	0	0	2	0	1	3	1	0	0	0	1	2
CUT232	CUT232	CUT232	0	6	11	4	0	1	78	35	43	11	0	5	1	4	3	4	3	3	0	0	0	3	4	4	0	10	11	3	0	1	7	15	20	3	0	2	4	7	8	2	3	2	0	0	0	3	3
CUT233	CUT233	CUT233	0	3	9	6	0	1	52	16	21	11	0	5	0	4	3	2	2	2	0	0	0	1	3	5	0	5	9	4	0	1	4	7	10	3	0	2	0	7	8	1	2	1	0	0	0	1	2
CUT234	CUT234	CUT234	0	1	1	0	0	0	30	9	17	5	0	1	0	0	0	1	0	0	0	1	0	2	0	1	0	2	1	0	0	0	3	4	8	1	0	0	0	0	0	0	0	0	0	3	0	2	0
CUT235	CUT235	CUT235	1	0	1	2	1	2	10	10	15	7	1	3	1	1	0	1	0	2	0	0	0	0	0	1	1	0	1	1	1	2	1	4	7	2	14	1	4	2	0	0	0	1	0	0	0	0	0
CUT236	CUT236	CUT236	4	0	2	3	3	7	124	62	55	9	0	8	1	0	0	6	3	2	3	1	1	3	4	6	4	0	2	2	3	6	11	26	25	2	0	4	4	0	0	3	3	1	12	3	2	3	3
CUT237	CUT237	CUT237	9	3	3	13	6	4	94	20	17	21	1	18	6	5	5	13	5	16	4	4	2	4	6	17	10	5	3	9	6	4	8	8	8	5	14	8	21	9	13	6	5	10	15	10	4	4	5
CUT238	CUT238	CUT238	1	1	0	1	0	1	50	8	15	3	0	1	0	0	0	1	0	0	0	0	0	0	1	0	1	2	0	1	0	1	4	3	7	1	0	0	0	0	0	0	0	0	0	0	0	0	1
CUT239	CUT239	CUT239	0	0	0	3	0	0	48	35	51	4	0	2	0	1	2	2	0	3	0	0	2	3	2	2	0	0	0	2	0	0	4	15	23	1	0	1	0	2	5	1	0	2	0	0	4	3	2
CUT240	CUT240	CUT240	0	0	1	6	1	1	18	18	17	4	0	4	0	1	0	3	0	1	0	1	2	2	0	0	0	0	1	4	1	1	2	7	8	1	0	2	0	2	0	1	0	1	0	3	4	2	0
CUT241	CUT241	CUT241	3	5	5	3	2	8	158	35	40	15	0	3	1	3	1	8	3	0	0	0	0	3	1	2	3	9	5	2	2	7	14	15	18	4	0	1	4	5	3	4	3	0	0	0	0	3	1
CUT242	CUT242	CUT242	0	0	1	1	0	0	8	6	7	4	0	0	0	1	0	1	0	1	0	0	0	1	1	0	0	0	1	1	0	0	1	2	3	1	0	0	0	2	0	0	0	1	0	0	0	1	1
CUT243	CUT243	CUT243	0	0	0	0	0	0	14	23	26	2	0	0	0	0	0	3	1	0	0	0	0	1	0	2	0	0	0	0	0	0	1	10	12	0	0	0	0	0	0	1	1	0	0	0	0	1	0
CUT244	CUT244	CUT244	0	1	1	1	1	4	24	15	12	4	0	11	0	0	1	4	4	1	1	1	1	3	2	5	0	2	1	1	1	4	2	6	5	1	0	5	0	0	3	2	4	1	4	3	2	3	2
CUT245	CUT245	CUT245	1	0	1	0	0	0	36	17	10	1	0	1	0	0	0	1	1	1	0	0	0	0	1	0	1	0	1	0	0	0	3	7	5	0	0	0	0	0	0	0	1	1	0	0	0	0	1
CUT246	CUT246	CUT246	4	9	4	7	5	1	202	130	137	11	2	8	2	4	1	18	6	9	4	6	5	8	6	16	4	15	4	5	5	1	17	54	62	3	27	4	7	7	3	9	6	6	15	15	11	7	5
CUT247	CUT247	CUT247	19	10	24	87	41	38	208	79	55	54	1	30	18	29	26	77	37	38	20	20	25	48	38	63	20	17	24	59	41	34	18	33	25	13	14	14	64	50	68	38	34	24	77	50	55	43	31
CUT248	CUT248	CUT248	1	0	0	1	0	1	24	11	10	2	0	0	0	0	0	0	0	0	0	0	0	1	0	0	1	0	0	1	0	1	2	5	5	0	0	0	0	0	0	0	0	0	0	0	0	1	0
CUT249	CUT249	CUT249	4	3	1	3	0	0	84	14	14	5	0	0	0	2	1	0	0	1	0	0	0	1	0	3	4	5	1	2	0	0	7	6	6	1	0	0	0	3	3	0	0	1	0	0	0	1	0
CUT250	CUT250	CUT250	1	1	0	0	0	4	78	18	36	9	0	3	0	0	0	2	0	3	0	1	1	0	1	1	1	2	0	0	0	4	7	7	16	2	0	1	0	0	0	1	0	2	0	3	2	0	1
CUT251	CUT251	CUT251	6	1	2	15	9	13	114	20	20	40	0	18	3	1	2	8	6	12	2	2	1	4	12	17	6	2	2	10	9	11	10	8	9	10	0	8	11	2	5	4	6	8	8	5	2	4	10
CUT252	CUT252	CUT252	1	2	2	1	4	0	20	11	14	1	0	1	0	1	0	1	1	3	0	0	1	1	1	4	1	3	2	1	4	0	2	5	6	0	0	0	0	2	0	0	1	2	0	0	2	1	1
CUT253	CUT253	CUT253	12	14	19	36	53	42	170	48	21	102	3	38	5	12	16	72	43	104	6	6	18	59	62	86	13	24	19	25	54	37	15	20	10	25	41	18	18	21	42	35	40	65	23	15	40	52	51
CUT254	CUT254	CUT254	1	1	1	8	6	4	42	26	24	5	0	2	0	1	0	0	0	0	0	2	0	2	2	0	1	2	1	5	6	4	4	11	11	1	0	1	0	2	0	0	0	0	0	5	0	2	2
CUT255	CUT255	CUT255	6	1	11	10	7	10	148	19	28	24	0	12	4	4	7	17	10	9	2	3	1	12	8	9	6	2	11	7	7	9	13	8	13	6	0	6	14	7	18	8	9	6	8	8	2	11	7
CUT256	CUT256	CUT256	0	1	3	7	2	3	26	3	4	22	1	13	6	11	8	20	6	8	3	2	4	10	2	19	0	2	3	5	2	3	2	1	2	5	14	6	21	19	21	10	6	5	12	5	9	9	2
CUT257	CUT257	CUT257	11	5	5	37	24	18	342	39	54	73	1	41	4	15	9	27	18	19	3	8	5	13	21	31	12	9	5	25	24	16	29	16	25	18	14	19	14	26	24	13	17	12	12	20	11	12	17
CUT258	CUT258	CUT258	3	1	0	8	6	9	106	11	15	15	0	11	0	3	3	7	5	3	1	3	1	5	6	8	3	2	0	5	6	8	9	5	7	4	0	5	0	5	8	3	5	2	4	8	2	4	5
CUT259	CUT259	CUT259	0	1	0	0	1	0	10	6	6	0	0	0	0	1	1	1	0	0	0	1	0	0	0	1	0	2	0	0	1	0	1	2	3	0	0	0	0	2	3	0	0	0	0	3	0	0	0
CUT260	CUT260	CUT260	2	2	3	2	3	6	38	24	33	9	0	4	2	1	2	1	2	2	1	0	2	3	2	3	2	3	3	1	3	5	3	10	15	2	0	2	7	2	5	0	2	1	4	0	4	3	2
CUT261	CUT261	CUT261	0	1	1	1	2	2	14	5	9	4	0	1	1	0	0	0	1	1	0	0	0	2	1	1	0	2	1	1	2	2	1	2	4	1	0	0	4	0	0	0	1	1	0	0	0	2	1
CUT262	CUT262	CUT262	10	11	15	13	7	7	218	65	64	52	3	45	2	1	1	22	12	11	2	1	0	11	9	22	11	19	15	9	7	6	19	27	29	13	41	21	7	2	3	11	11	7	8	3	0	10	7
CUT263	CUT263	CUT263	7	1	7	36	42	60	88	32	27	38	0	10	7	5	2	23	18	39	0	3	0	18	19	25	8	2	7	25	42	53	8	13	12	9	0	5	25	9	5	11	17	25	0	8	0	16	16
CUT264	CUT264	CUT264	0	1	1	0	2	3	218	53	49	4	0	6	1	0	1	2	2	4	0	1	1	0	1	1	0	2	1	0	2	3	19	22	22	1	0	3	4	0	3	1	2	3	0	3	2	0	1
CUT265	CUT265	CUT265	2	7	7	4	2	3	208	91	64	10	0	2	2	1	0	6	3	4	1	1	5	4	5	7	2	12	7	3	2	3	18	38	29	2	0	1	7	2	0	3	3	3	4	3	11	4	4
CUT266	CUT266	CUT266	3	3	2	10	7	5	222	33	48	24	1	20	3	4	0	13	9	12	1	0	3	5	3	14	3	5	2	7	7	4	19	14	22	6	14	9	11	7	0	6	8	8	4	0	7	4	2
CUT267	CUT267	CUT267	0	1	1	6	3	4	48	12	29	8	2	4	0	4	1	3	0	3	0	0	1	1	0	1	0	2	1	4	3	4	4	5	13	2	27	2	0	7	3	1	0	2	0	0	2	1	0
CUT268	CUT268	CUT268	0	0	0	11	10	3	68	14	24	27	1	9	1	0	1	12	5	6	2	0	1	7	6	9	0	0	0	7	10	3	6	6	11	7	14	4	4	0	3	6	5	4	8	0	2	6	5
CUT269	CUT269	CUT269	1	1	2	1	0	1	32	14	10	1	0	0	1	0	0	1	1	0	0	0	0	0	2	0	1	2	2	1	0	1	3	6	5	0	0	0	4	0	0	0	1	0	0	0	0	0	2
CUT270	CUT270	CUT270	4	1	6	8	6	4	88	36	63	10	0	1	0	0	3	7	5	0	0	1	1	2	2	2	4	2	6	5	6	4	8	15	29	2	0	0	0	0	8	3	5	0	0	3	2	2	2
CUT271	CUT271	CUT271	4	1	1	2	1	0	26	17	18	3	0	1	0	0	1	0	0	0	0	1	1	0	0	0	4	2	1	1	1	0	2	7	8	1	0	0	0	0	3	0	0	0	0	3	2	0	0
CUT272	CUT272	CUT272	0	2	4	0	3	1	68	27	29	0	0	5	1	2	0	3	0	1	0	0	0	2	0	0	0	3	4	0	3	1	6	11	13	0	0	2	4	3	0	1	0	1	0	0	0	2	0
CUT273	CUT273	CUT273	0	1	4	2	1	4	78	21	25	4	0	7	1	1	2	7	2	3	2	1	1	1	1	5	0	2	4	1	1	4	7	9	11	1	0	3	4	2	5	3	2	2	8	3	2	1	1
CUT274	CUT274	CUT274	0	0	3	3	0	2	64	10	13	4	0	4	0	1	0	0	1	1	0	2	1	0	1	1	0	0	3	2	0	2	6	4	6	1	0	2	0	2	0	0	1	1	0	5	2	0	1
CUT275	CUT275	CUT275	1	1	0	2	5	6	54	17	6	11	0	2	0	3	1	4	3	2	1	0	1	2	5	5	1	2	0	1	5	5	5	7	3	3	0	1	0	5	3	2	3	1	4	0	2	2	4
CUT276	CUT276	CUT276	0	0	1	7	2	7	44	7	3	17	1	11	2	5	0	9	2	7	4	3	2	7	2	10	0	0	1	5	2	6	4	3	1	4	14	5	7	9	0	4	2	4	15	8	4	6	2
CUT277	CUT277	CUT277	0	0	0	0	0	0	6	3	6	2	0	0	0	0	0	0	0	0	0	0	0	0	0	0	0	0	0	0	0	0	1	1	3	0	0	0	0	0	0	0	0	0	0	0	0	0	0
CUT278	CUT278	CUT278	4	5	1	13	10	9	134	42	50	36	0	14	2	3	1	7	6	6	1	1	2	7	3	8	4	9	1	9	10	8	12	17	23	9	0	7	7	5	3	3	6	4	4	3	4	6	2
CUT279	CUT279	CUT279	4	3	2	9	11	8	100	21	20	32	1	11	2	4	0	8	4	6	0	1	1	6	2	7	4	5	2	6	11	7	9	9	9	8	14	5	7	7	0	4	4	4	0	3	2	5	2
CUT280	CUT280	CUT280	0	1	0	1	0	0	18	18	23	3	0	2	0	0	0	1	0	0	0	0	0	0	1	3	0	2	0	1	0	0	2	7	10	1	0	1	0	0	0	0	0	0	0	0	0	0	1
CUT281	CUT281	CUT281	3	1	1	3	8	5	56	17	12	13	1	19	7	2	1	20	2	3	5	2	1	16	3	6	3	2	1	2	8	4	5	7	5	3	14	9	25	3	3	10	2	2	19	5	2	14	2
CUT282	CUT282	CUT282	8	7	9	21	15	23	102	16	13	37	0	25	2	6	5	17	12	11	2	4	3	15	9	16	9	12	9	14	15	20	9	7	6	9	0	12	7	10	13	8	11	7	8	10	7	13	7
CUT283	CUT283	CUT283	1	1	1	7	8	13	60	29	22	3	0	10	1	0	0	2	4	4	0	1	1	2	2	0	1	2	1	5	8	11	5	12	10	1	0	5	4	0	0	1	4	3	0	3	2	2	2
CUT284	CUT284	CUT284	6	4	4	38	42	34	140	34	28	61	0	25	7	10	5	21	12	20	6	6	6	15	10	11	6	7	4	26	42	30	12	14	13	15	0	12	25	17	13	10	11	13	23	15	13	13	8
CUT285	CUT285	CUT285	0	0	1	2	0	0	32	16	23	4	0	0	0	1	0	3	1	1	1	0	0	2	0	4	0	0	1	1	0	0	3	7	10	1	0	0	0	2	0	1	1	1	4	0	0	2	0
CUT286	CUT286	CUT286	0	0	0	2	0	0	14	13	18	1	0	0	0	0	0	1	0	0	0	0	0	1	0	3	0	0	0	1	0	0	1	5	8	0	0	0	0	0	0	0	0	0	0	0	0	1	0
CUT287	CUT287	CUT287	151	82	112	167	132	96	528	140	103	432	6	148	33	75	61	201	137	364	28	40	60	164	211	288	162	140	111	114	134	85	46	58	47	106	82	69	117	131	160	99	126	229	108	101	132	146	174
CUT288	CUT288	CUT288	0	0	0	2	0	0	20	15	21	1	0	0	1	0	0	3	0	1	1	0	1	0	0	2	0	0	0	1	0	0	2	6	10	0	0	0	4	0	0	1	0	1	4	0	2	0	0
CUT289	CUT289	CUT289	16	11	23	109	83	90	566	83	92	68	2	47	13	17	14	70	24	32	9	10	16	23	24	43	17	19	23	74	84	80	49	35	42	17	27	22	46	30	37	34	22	20	35	25	35	20	20
CUT290	CUT290	CUT290	12	4	11	45	27	25	590	115	84	38	0	24	9	16	15	43	15	23	11	16	14	27	14	39	13	7	11	31	27	22	51	48	38	9	0	11	32	28	39	21	14	14	42	40	31	24	12
CUT291	CUT291	CUT291	15	10	9	40	27	24	248	36	44	87	0	77	8	5	3	38	19	22	3	4	10	21	14	28	16	17	9	27	27	21	21	15	20	21	0	36	28	9	8	19	18	14	12	10	22	19	12
CUT292	CUT292	CUT292	4	3	9	29	13	15	72	8	10	17	1	18	3	5	5	10	6	2	5	1	2	6	3	10	4	5	9	20	13	13	6	3	5	4	14	8	11	9	13	5	6	1	19	3	4	5	2
CUT293	CUT293	CUT293	0	2	3	4	5	7	116	14	25	11	0	3	1	0	1	2	3	6	0	0	1	0	2	3	0	3	3	3	5	6	10	6	11	3	0	1	4	0	3	1	3	4	0	0	2	0	2
CUT294	CUT294	CUT294	0	1	0	0	1	1	18	27	61	1	0	0	1	1	1	3	0	3	0	0	2	1	1	0	0	2	0	0	1	1	2	11	28	0	0	0	4	2	3	1	0	2	0	0	4	1	1
CUT295	CUT295	CUT295	0	1	0	1	0	2	20	30	63	2	0	0	1	0	2	2	0	3	0	0	2	0	1	1	0	2	0	1	0	2	2	12	29	0	0	0	4	0	5	1	0	2	0	0	4	0	1
CUT296	CUT296	CUT296	0	1	2	2	3	1	122	13	22	24	0	3	2	4	1	10	6	13	0	2	3	0	7	7	0	2	2	1	3	1	11	5	10	6	0	1	7	7	3	5	6	8	0	5	7	0	6
CUT297	CUT297	CUT297	12	3	21	10	22	13	284	60	74	57	1	22	2	7	4	27	12	33	3	3	1	19	21	20	13	5	21	7	22	11	24	25	34	14	14	10	7	12	10	13	11	21	12	8	2	17	17
CUT298	CUT298	CUT298	4	1	1	2	2	3	20	9	18	18	0	5	0	7	2	4	2	3	3	3	3	2	4	7	4	2	1	1	2	3	2	4	8	4	0	2	0	12	5	2	2	2	12	8	7	2	3
CUT299	CUT299	CUT299	6	3	4	6	0	1	268	61	36	19	1	17	3	1	0	11	4	4	1	1	0	4	3	5	6	5	4	4	0	1	23	25	16	5	14	8	11	2	0	5	4	3	4	3	0	4	2
CUT300	CUT300	CUT300	3	0	2	6	2	2	82	25	42	8	0	0	1	3	1	4	4	4	1	0	2	1	5	6	3	0	2	4	2	2	7	10	19	2	0	0	4	5	3	2	4	3	4	0	4	1	4
CUT301	CUT301	CUT301	4	0	2	8	3	6	38	21	27	11	0	3	0	1	0	3	2	2	2	0	1	1	4	2	4	0	2	5	3	5	3	9	12	3	0	1	0	2	0	1	2	1	8	0	2	1	3
CUT302	CUT302	CUT302	1	0	0	4	2	3	16	9	10	5	0	0	0	1	0	1	1	1	0	0	1	0	2	1	1	0	0	3	2	3	1	4	5	1	0	0	0	2	0	0	1	1	0	0	2	0	2
CUT303	CUT303	CUT303	0	0	2	0	1	1	26	22	31	4	0	6	0	0	0	1	0	1	0	0	0	0	0	2	0	0	2	0	1	1	2	9	14	1	0	3	0	0	0	0	0	1	0	0	0	0	0
CUT304	CUT304	CUT304	0	0	1	2	0	0	52	8	18	3	0	3	0	0	1	1	1	0	2	0	1	2	0	3	0	0	1	1	0	0	4	3	8	1	0	1	0	0	3	0	1	0	8	0	2	2	0
CUT305	CUT305	CUT305	1	1	1	3	2	6	90	60	51	2	0	2	1	1	1	7	1	2	0	1	1	2	3	3	1	2	1	2	2	5	8	25	23	0	0	1	4	2	3	3	1	1	0	3	2	2	2
CUT306	CUT306	CUT306	19	16	19	15	7	16	910	181	201	61	1	42	9	12	5	43	23	23	7	2	5	26	18	44	20	27	19	10	7	14	78	75	91	15	14	20	32	21	13	21	21	14	27	5	11	23	15
CUT307	CUT307	CUT307	0	0	1	2	1	4	24	6	5	1	0	3	0	0	0	1	0	2	0	0	0	0	0	4	0	0	1	1	1	4	2	2	2	0	0	1	0	0	0	0	0	1	0	0	0	0	0
CUT308	CUT308	CUT308	1	1	1	3	8	6	70	12	9	15	0	10	0	0	0	5	1	4	0	0	1	1	2	6	1	2	1	2	8	5	6	5	4	4	0	5	0	0	0	2	1	3	0	0	2	1	2
CUT309	CUT309	CUT309	1	0	1	2	1	2	38	20	26	7	0	3	0	0	0	2	0	3	0	1	1	5	1	4	1	0	1	1	1	2	3	8	12	2	0	1	0	0	0	1	0	2	0	3	2	4	1
CUT310	CUT310	CUT310	0	0	0	0	0	4	38	18	14	10	0	3	1	0	0	2	1	2	0	0	1	0	2	5	0	0	0	0	0	4	3	7	6	2	0	1	4	0	0	1	1	1	0	0	2	0	2
CUT311	CUT311	CUT311	44	6	20	14	11	6	240	56	47	180	0	75	5	9	6	77	30	58	1	6	10	28	42	84	47	10	20	10	11	5	21	23	21	44	0	35	18	16	16	38	28	36	4	15	22	25	35
CUT312	CUT312	CUT312	6	3	3	22	19	11	82	22	27	17	0	11	2	2	2	19	8	12	1	2	0	5	18	16	6	5	3	15	19	10	7	9	12	4	0	5	7	3	5	9	7	8	4	5	0	4	15
CUT313	CUT313	CUT313	0	1	0	1	0	0	28	11	7	2	0	3	0	1	0	0	1	0	0	0	0	2	0	2	0	2	0	1	0	0	2	5	3	0	0	1	0	2	0	0	1	0	0	0	0	2	0
CUT314	CUT314	CUT314	4	3	16	6	3	4	368	52	78	47	0	30	1	1	0	3	1	0	0	1	2	1	0	0	4	5	16	4	3	4	32	22	35	12	0	14	4	2	0	1	1	0	0	3	4	1	0
CUT315	CUT315	CUT315	1	1	0	1	2	0	52	17	24	3	1	1	1	0	0	2	0	1	0	0	0	3	1	4	1	2	0	1	2	0	4	7	11	1	14	0	4	0	0	1	0	1	0	0	0	3	1
CUT316	CUT316	CUT316	37	20	28	69	80	74	296	63	54	103	2	50	4	9	8	49	32	63	7	6	9	30	39	52	40	34	28	47	81	65	26	26	25	25	27	23	14	16	21	24	30	40	27	15	20	27	32
CUT317	CUT317	CUT317	0	1	1	0	1	2	22	7	15	1	0	0	1	0	0	3	1	0	0	0	0	2	1	2	0	2	1	0	1	2	2	3	7	0	0	0	4	0	0	1	1	0	0	0	0	2	1
CUT318	CUT318	CUT318	0	1	0	0	1	1	6	5	4	1	0	0	0	0	0	0	0	0	0	0	0	1	0	2	0	2	0	0	1	1	1	2	2	0	0	0	0	0	0	0	0	0	0	0	0	1	0
CUT319	CUT319	CUT319	0	0	2	3	0	1	42	20	29	5	0	0	0	0	0	5	3	1	0	0	1	5	3	3	0	0	2	2	0	1	4	8	13	1	0	0	0	0	0	2	3	1	0	0	2	4	2
CUT320	CUT320	CUT320	1	1	0	0	0	0	10	11	22	2	0	0	0	0	1	2	0	0	0	0	0	2	0	0	1	2	0	0	0	0	1	5	10	0	0	0	0	0	3	1	0	0	0	0	0	2	0
CUT321	CUT321	CUT321	1	1	0	0	1	0	42	13	10	3	0	0	0	0	0	1	0	1	2	1	1	0	0	2	1	2	0	0	1	0	4	5	5	1	0	0	0	0	0	0	0	1	8	3	2	0	0
CUT322	CUT322	CUT322	0	0	0	0	0	0	26	13	26	0	0	1	1	0	0	1	0	1	0	0	0	0	0	3	0	0	0	0	0	0	2	5	12	0	0	0	4	0	0	0	0	1	0	0	0	0	0
CUT323	CUT323	CUT323	8	1	4	5	14	12	60	17	10	15	0	6	1	2	1	4	3	4	0	2	1	4	10	16	9	2	4	3	14	11	5	7	5	4	0	3	4	3	3	2	3	3	0	5	2	4	8
CUT324	CUT324	CUT324	0	2	2	4	2	1	54	29	19	1	0	1	1	0	0	4	2	0	0	0	0	3	3	2	0	3	2	3	2	1	5	12	9	0	0	0	4	0	0	2	2	0	0	0	0	3	2
CUT325	CUT325	CUT325	15	6	10	9	4	5	156	56	35	57	0	19	2	3	1	15	9	4	0	0	0	8	11	15	16	10	10	6	4	4	13	23	16	14	0	9	7	5	3	7	8	3	0	0	0	7	9
CUT326	CUT326	CUT326	14	8	10	30	43	35	172	95	48	54	2	41	5	7	8	36	29	46	4	10	14	21	37	55	15	14	10	20	43	31	15	40	22	13	27	19	18	12	21	18	27	29	15	25	31	19	31
CUT327	CUT327	CUT327	0	1	1	0	0	1	8	4	13	0	0	2	0	0	0	2	0	0	1	0	0	2	1	0	0	2	1	0	0	1	1	2	6	0	0	1	0	0	0	1	0	0	4	0	0	2	1
CUT328	CUT328	CUT328	3	1	0	19	11	14	106	10	13	23	0	16	1	5	3	18	4	13	5	2	1	7	4	11	3	2	0	13	11	12	9	4	6	6	0	7	4	9	8	9	4	8	19	5	2	6	3
CUT329	CUT329	CUT329	43	12	40	5	19	10	276	49	69	168	1	81	3	9	2	49	50	77	5	4	11	29	57	66	46	21	40	3	19	9	24	20	31	41	14	38	11	16	5	24	46	48	19	10	24	26	47
CUT330	CUT330	CUT330	3	4	3	4	3	4	90	39	42	19	0	13	7	9	3	21	6	19	3	4	5	8	9	11	3	7	3	3	3	4	8	16	19	5	0	6	25	16	8	10	6	12	12	10	11	7	7
CUT331	CUT331	CUT331	8	10	20	40	29	25	272	48	41	53	0	57	2	7	2	28	9	16	6	0	4	18	19	35	9	17	20	27	29	22	23	20	19	13	0	27	7	12	5	14	8	10	23	0	9	16	16
CUT332	CUT332	CUT332	0	0	0	0	0	1	22	10	15	1	0	0	0	0	1	1	0	1	0	0	1	0	0	1	0	0	0	0	0	1	2	4	7	0	0	0	0	0	3	0	0	1	0	0	2	0	0
CUT333	CUT333	CUT333	1	1	0	3	1	1	36	5	7	11	0	6	0	0	0	6	2	0	0	3	0	2	1	2	1	2	0	2	1	1	3	2	3	3	0	3	0	0	0	3	2	0	0	8	0	2	1
CUT334	CUT334	CUT334	4	2	2	6	5	7	86	19	10	20	0	13	3	1	2	11	4	3	0	0	2	3	3	8	4	3	2	4	5	6	7	8	5	5	0	6	11	2	5	5	4	2	0	0	4	3	2
CUT335	CUT335	CUT335	0	0	0	0	0	0	22	10	15	1	0	1	0	0	0	0	0	0	0	0	0	2	0	0	0	0	0	0	0	0	2	4	7	0	0	0	0	0	0	0	0	0	0	0	0	2	0
CUT336	CUT336	CUT336	1	2	0	6	1	8	34	16	7	11	0	3	0	5	0	4	2	2	1	1	0	3	3	4	1	3	0	4	1	7	3	7	3	3	0	1	0	9	0	2	2	1	4	3	0	3	2
CUT337	CUT337	CUT337	192	65	107	642	689	661	1074	238	305	513	9	221	33	48	36	190	151	279	29	58	51	131	210	263	206	111	106	437	697	584	93	99	139	126	123	103	117	84	94	93	139	175	111	146	112	116	173
CUT338	CUT338	CUT338	0	0	1	0	0	0	14	2	4	0	0	2	0	0	0	0	1	1	0	0	0	0	1	0	0	0	1	0	0	0	1	1	2	0	0	1	0	0	0	0	1	1	0	0	0	0	1
CUT339	CUT339	CUT339	8	4	10	17	9	6	136	14	13	44	1	27	2	2	1	12	5	8	3	3	2	8	5	11	9	7	10	12	9	5	12	6	6	11	14	13	7	3	3	6	5	5	12	8	4	7	4
CUT340	CUT340	CUT340	1	1	6	7	3	2	82	36	57	13	0	5	0	1	1	4	5	3	1	2	2	0	4	0	1	2	6	5	3	2	7	15	26	3	0	2	0	2	3	2	5	2	4	5	4	0	3
CUT341	CUT341	CUT341	1	0	1	2	1	5	54	26	22	7	0	1	2	0	0	4	1	1	0	0	1	6	3	5	1	0	1	1	1	4	5	11	10	2	0	0	7	0	0	2	1	1	0	0	2	5	2
CUT342	CUT342	CUT342	2	0	4	5	1	1	46	9	25	4	1	3	2	2	0	7	2	0	0	0	3	5	3	1	2	0	4	3	1	1	4	4	11	1	14	1	7	3	0	3	2	0	0	0	7	4	2
CUT343	CUT343	CUT343	2	2	3	8	4	6	60	13	27	6	0	1	1	0	0	5	3	2	0	0	2	3	2	3	2	3	3	5	4	5	5	5	12	1	0	0	4	0	0	2	3	1	0	0	4	3	2
CUT344	CUT344	CUT344	13	14	13	52	32	30	450	116	97	44	0	44	7	9	6	33	18	23	1	11	8	16	12	22	14	24	13	35	32	27	39	48	44	11	0	21	25	16	16	16	17	14	4	28	18	14	10
CUT345	CUT345	CUT345	0	3	2	1	1	1	24	22	24	8	0	2	0	0	0	3	2	2	0	0	0	2	0	3	0	5	2	1	1	1	2	9	11	2	0	1	0	0	0	1	2	1	0	0	0	2	0
CUT346	CUT346	CUT346	11	5	12	109	88	90	226	16	15	55	2	27	4	8	9	33	9	25	5	2	11	18	15	27	12	9	12	74	89	80	19	7	7	14	27	13	14	14	24	16	8	16	19	5	24	16	12
CUT347	CUT347	CUT347	2	1	2	6	2	6	174	26	36	22	0	10	0	1	1	3	1	6	0	1	0	1	3	1	2	2	2	4	2	5	15	11	16	5	0	5	0	2	3	1	1	4	0	3	0	1	2
CUT348	CUT348	CUT348	0	0	0	0	0	0	10	2	5	1	0	0	0	0	1	0	0	0	0	0	0	0	0	1	0	0	0	0	0	0	1	1	2	0	0	0	0	0	3	0	0	0	0	0	0	0	0
CUT349	CUT349	CUT349	4	2	3	40	17	24	126	63	47	10	0	9	5	12	6	36	16	22	6	8	10	22	9	14	4	3	3	27	17	21	11	26	21	2	0	4	18	21	16	18	15	14	23	20	22	20	7
CUT350	CUT350	CUT350	2	3	4	5	6	5	324	137	141	13	1	5	4	3	3	16	5	2	1	1	0	3	7	10	2	5	4	3	6	4	28	57	64	3	14	2	14	5	8	8	5	1	4	3	0	3	6
CUT351	CUT351	CUT351	1	0	1	0	0	0	8	8	7	1	0	0	0	0	0	1	0	0	0	0	0	0	1	0	1	0	1	0	0	0	1	3	3	0	0	0	0	0	0	0	0	0	0	0	0	0	1
CUT352	CUT352	CUT352	6	0	2	3	2	3	42	14	19	7	0	2	1	6	2	14	9	4	2	7	8	1	5	12	6	0	2	2	2	3	4	6	9	2	0	1	4	10	5	7	8	3	8	18	18	1	4
CUT353	CUT353	CUT353	2	2	4	5	3	1	116	18	22	7	0	4	1	1	1	6	4	2	0	2	0	1	2	7	2	3	4	3	3	1	10	7	10	2	0	2	4	2	3	3	4	1	0	5	0	1	2
CUT354	CUT354	CUT354	8	8	7	12	13	13	228	105	107	20	0	15	3	4	1	11	4	14	2	2	2	6	5	14	9	14	7	8	13	11	20	44	49	5	0	7	11	7	3	5	4	9	8	5	4	5	4
CUT355	CUT355	CUT355	4	0	0	8	2	6	32	13	9	16	1	8	1	1	2	4	6	7	1	2	3	6	5	6	4	0	0	5	2	5	3	5	4	4	14	4	4	2	5	2	6	4	4	5	7	5	4
CUT356	CUT356	CUT356	0	2	1	0	0	0	12	6	7	2	0	0	0	0	0	2	0	2	1	1	0	1	0	0	0	3	1	0	0	0	1	2	3	0	0	0	0	0	0	1	0	1	4	3	0	1	0
CUT357	CUT357	CUT357	6	3	11	10	7	10	238	28	30	41	1	19	1	4	2	7	7	11	1	1	4	6	10	3	6	5	11	7	7	9	21	12	14	10	14	9	4	7	5	3	6	7	4	3	9	5	8
CUT358	CUT358	CUT358	0	0	2	0	0	3	40	8	8	3	1	2	2	0	0	2	1	0	0	1	0	3	1	3	0	0	2	0	0	3	3	3	4	1	14	1	7	0	0	1	1	0	0	3	0	3	1
CUT359	CUT359	CUT359	33	19	25	100	120	127	214	62	43	140	0	55	11	36	23	65	64	92	17	22	24	46	74	94	35	32	25	68	121	112	18	26	20	35	0	26	39	63	60	32	59	58	65	55	53	41	61
CUT360	CUT360	CUT360	1	2	1	1	0	0	162	31	21	7	0	5	0	0	2	3	1	2	0	0	1	0	2	2	1	3	1	1	0	0	14	13	10	2	0	2	0	0	5	1	1	1	0	0	2	0	2
CUT361	CUT361	CUT361	4	0	5	8	8	6	104	22	25	42	0	10	0	6	5	9	14	21	2	7	3	8	9	22	4	0	5	5	8	5	9	9	11	10	0	5	0	10	13	4	13	13	8	18	7	7	7
CUT362	CUT362	CUT362	0	0	0	0	0	0	12	11	24	0	0	0	0	1	0	0	0	0	0	0	0	0	0	0	0	0	0	0	0	0	1	5	11	0	0	0	0	2	0	0	0	0	0	0	0	0	0
CUT363	CUT363	CUT363	0	0	0	1	1	0	6	9	10	1	0	0	0	0	1	3	1	1	0	1	0	1	0	1	0	0	0	1	1	0	1	4	5	0	0	0	0	0	3	1	1	1	0	3	0	1	0
CUT364	CUT364	CUT364	0	0	0	1	0	0	4	4	5	0	0	0	0	2	0	1	0	1	0	0	0	0	0	0	0	0	0	1	0	0	0	2	2	0	0	0	0	3	0	0	0	1	0	0	0	0	0
CUT365	CUT365	CUT365	3	2	2	2	2	0	150	25	43	11	0	4	1	1	1	8	3	2	2	0	0	2	5	4	3	3	2	1	2	0	13	10	20	3	0	2	4	2	3	4	3	1	8	0	0	2	4
CUT366	CUT366	CUT366	3	0	1	10	5	5	106	22	25	23	0	8	0	1	0	9	7	13	3	1	2	6	5	7	3	0	1	7	5	4	9	9	11	6	0	4	0	2	0	4	6	8	12	3	4	5	4
CUT367	CUT367	CUT367	2	1	2	1	0	1	40	12	12	8	0	10	2	6	3	10	4	7	1	0	2	2	4	11	2	2	2	1	0	1	3	5	5	2	0	5	7	10	8	5	4	4	4	0	4	2	3
CUT368	CUT368	CUT368	3	0	10	28	19	8	134	45	50	36	1	7	2	2	2	13	8	6	0	3	4	8	8	11	3	0	10	19	19	7	12	19	23	9	14	3	7	3	5	6	7	4	0	8	9	7	7
CUT369	CUT369	CUT369	3	0	2	3	2	1	32	17	23	7	0	4	2	1	0	2	0	1	0	2	2	3	0	1	3	0	2	2	2	1	3	7	10	2	0	2	7	2	0	1	0	1	0	5	4	3	0
CUT370	CUT370	CUT370	0	0	0	1	0	0	26	5	2	0	0	1	0	0	0	2	0	0	0	0	0	1	3	1	0	0	0	1	0	0	2	2	1	0	0	0	0	0	0	1	0	0	0	0	0	1	2
CUT371	CUT371	CUT371	1	0	1	1	3	5	52	7	22	8	0	5	0	1	3	12	5	4	2	3	4	3	4	18	1	0	1	1	3	4	4	3	10	2	0	2	0	2	8	6	5	3	8	8	9	3	3
CUT372	CUT372	CUT372	0	2	1	1	0	0	18	20	25	1	0	0	0	1	0	1	0	0	0	1	1	3	0	3	0	3	1	1	0	0	2	8	11	0	0	0	0	2	0	0	0	0	0	3	2	3	0
CUT373	CUT373	CUT373	1	1	3	9	5	3	130	72	76	16	0	5	0	0	1	7	4	2	0	0	1	3	1	5	1	2	3	6	5	3	11	30	35	4	0	2	0	0	3	3	4	1	0	0	2	3	1
CUT374	CUT374	CUT374	0	1	1	1	1	1	22	14	15	3	0	1	0	1	1	3	4	1	0	0	1	1	0	4	0	2	1	1	1	1	2	6	7	1	0	0	0	2	3	1	4	1	0	0	2	1	0
CUT375	CUT375	CUT375	5	10	9	17	12	16	162	66	93	82	0	46	15	27	16	77	37	51	12	14	20	52	40	67	5	17	9	12	12	14	14	27	42	20	0	21	53	47	42	38	34	32	46	35	44	46	33
CUT376	CUT376	CUT376	6	2	3	18	15	17	144	23	14	56	0	26	2	3	1	21	2	12	1	5	4	6	11	16	6	3	3	12	15	15	12	10	6	14	0	12	7	5	3	10	2	8	4	13	9	5	9
CUT377	CUT377	CUT377	4	4	5	18	12	17	146	27	22	30	0	20	4	8	4	19	9	14	3	2	2	10	11	21	4	7	5	12	12	15	13	11	10	7	0	9	14	14	10	9	8	9	12	5	4	9	9
CUT378	CUT378	CUT378	0	2	4	11	9	5	262	115	118	13	1	7	0	5	2	7	7	3	0	3	4	1	4	10	0	3	4	7	9	4	23	48	54	3	14	3	0	9	5	3	6	2	0	8	9	1	3
CUT379	CUT379	CUT379	1	0	2	2	1	1	84	47	44	6	0	4	0	1	0	4	5	1	0	0	0	4	1	4	1	0	2	1	1	1	7	20	20	1	0	2	0	2	0	2	5	1	0	0	0	4	1
CUT380	CUT380	CUT380	1	2	3	5	8	5	124	18	17	38	0	8	0	4	2	12	5	9	2	2	2	5	7	10	1	3	3	3	8	4	11	7	8	9	0	4	0	7	5	6	5	6	8	5	4	4	6
CUT381	CUT381	CUT381	1	0	4	3	4	3	28	10	9	14	0	4	0	0	0	3	0	1	0	2	0	1	2	3	1	0	4	2	4	3	2	4	4	3	0	2	0	0	0	1	0	1	0	5	0	1	2
CUT382	CUT382	CUT382	0	0	1	0	0	0	24	26	33	0	0	0	0	0	0	1	0	0	0	0	0	0	0	0	0	0	1	0	0	0	2	11	15	0	0	0	0	0	0	0	0	0	0	0	0	0	0
CUT383	CUT383	CUT383	0	2	3	0	1	2	62	44	72	2	0	2	0	0	0	6	1	4	0	1	2	5	1	5	0	3	3	0	1	2	5	18	33	0	0	1	0	0	0	3	1	3	0	3	4	4	1
CUT384	CUT384	CUT384	0	0	1	0	0	1	14	14	12	0	0	0	0	0	0	0	0	0	0	0	0	0	0	0	0	0	1	0	0	1	1	6	5	0	0	0	0	0	0	0	0	0	0	0	0	0	0
CUT385	CUT385	CUT385	0	0	0	6	2	3	76	16	18	14	0	7	0	1	0	9	2	3	0	2	2	3	1	8	0	0	0	4	2	3	7	7	8	3	0	3	0	2	0	4	2	2	0	5	4	3	1
CUT386	CUT386	CUT386	2	3	2	5	4	5	104	53	47	20	0	6	0	1	2	4	6	5	1	2	1	3	6	6	2	5	2	3	4	4	9	22	21	5	0	3	0	2	5	2	6	3	4	5	2	3	5
CUT387	CUT387	CUT387	2	2	1	2	0	2	40	18	23	10	0	5	2	2	0	3	2	2	0	0	1	2	2	1	2	3	1	1	0	2	3	7	10	2	0	2	7	3	0	1	2	1	0	0	2	2	2
CUT388	CUT388	CUT388	4	2	0	3	5	2	42	2	4	65	3	13	6	13	9	23	10	16	9	2	8	9	10	25	4	3	0	2	5	2	4	1	2	16	41	6	21	23	24	11	9	10	35	5	18	8	8
CUT389	CUT389	CUT389	1	1	1	8	2	1	58	33	40	5	0	3	0	2	1	4	2	0	1	0	0	1	2	8	1	2	1	5	2	1	5	14	18	1	0	1	0	3	3	2	2	0	4	0	0	1	2
CUT390	CUT390	CUT390	2	0	3	5	4	4	168	25	23	14	0	13	0	4	0	8	3	2	0	1	2	1	4	3	2	0	3	3	4	4	14	10	10	3	0	6	0	7	0	4	3	1	0	3	4	1	3
CUT391	CUT391	CUT391	5	2	3	1	3	5	54	16	10	14	0	3	0	1	3	9	3	6	1	2	3	5	4	9	5	3	3	1	3	4	5	7	5	3	0	1	0	2	8	4	3	4	4	5	7	4	3
CUT392	CUT392	CUT392	8	5	13	102	87	66	200	29	14	97	3	50	13	16	8	42	30	41	6	9	13	26	35	41	9	9	13	69	88	58	17	12	6	24	41	23	46	28	21	21	28	26	23	23	29	23	29
CUT393	CUT393	CUT393	1	0	0	2	1	1	38	6	9	5	0	0	0	0	0	3	1	0	1	1	1	0	1	2	1	0	0	1	1	1	3	2	4	1	0	0	0	0	0	1	1	0	4	3	2	0	1
CUT394	CUT394	CUT394	1	3	8	13	10	7	188	62	64	19	0	5	1	3	3	12	6	8	1	1	4	8	7	7	1	5	8	9	10	6	16	26	29	5	0	2	4	5	8	6	6	5	4	3	9	7	6
CUT395	CUT395	CUT395	0	0	2	8	0	2	38	14	14	9	0	2	1	2	3	10	4	8	2	2	4	6	4	9	0	0	2	5	0	2	3	6	6	2	0	1	4	3	8	5	4	5	8	5	9	5	3
CUT396	CUT396	CUT396	1	1	1	0	0	0	30	10	27	2	0	2	1	0	0	3	0	0	0	0	0	0	0	0	1	2	1	0	0	0	3	4	12	0	0	1	4	0	0	1	0	0	0	0	0	0	0
CUT397	CUT397	CUT397	1	1	0	1	0	0	8	2	6	1	0	1	0	0	0	2	0	0	0	0	0	0	0	0	1	2	0	1	0	0	1	1	3	0	0	0	0	0	0	1	0	0	0	0	0	0	0
CUT398	CUT398	CUT398	0	1	1	0	1	0	34	18	30	5	0	0	0	0	0	2	0	1	0	0	2	0	0	0	0	2	1	0	1	0	3	7	14	1	0	0	0	0	0	1	0	1	0	0	4	0	0
CUT399	CUT399	CUT399	0	0	2	2	0	2	26	22	27	7	0	0	0	3	0	5	0	1	0	0	2	1	1	2	0	0	2	1	0	2	2	9	12	2	0	0	0	5	0	2	0	1	0	0	4	1	1
CUT400	CUT400	CUT400	3	3	2	4	7	3	88	34	36	16	0	7	2	1	0	8	1	3	1	0	1	7	6	4	3	5	2	3	7	3	8	14	16	4	0	3	7	2	0	4	1	2	4	0	2	6	5
CUT401	CUT401	CUT401	1	2	2	5	3	1	22	6	14	4	0	4	0	2	1	1	0	2	0	1	0	1	0	3	1	3	2	3	3	1	2	2	6	1	0	2	0	3	3	0	0	1	0	3	0	1	0
CUT402	CUT402	CUT402	4	0	3	13	9	13	88	31	31	22	0	9	4	9	8	33	7	11	4	7	12	17	7	8	4	0	3	9	9	11	8	13	14	5	0	4	14	16	21	16	6	7	15	18	26	15	6
CUT403	CUT403	CUT403	1	2	4	4	2	3	88	32	46	25	1	11	2	1	2	6	4	10	1	3	4	7	3	15	1	3	4	3	2	3	8	13	21	6	14	5	7	2	5	3	4	6	4	8	9	6	2
CUT404	CUT404	CUT404	77	43	67	253	267	213	688	150	114	306	7	104	19	56	28	111	115	188	20	38	38	73	130	172	83	73	67	172	270	188	59	62	52	75	96	49	67	97	73	55	106	118	77	96	84	65	107
CUT405	CUT405	CUT405	2	2	5	7	1	4	94	30	46	7	0	2	0	1	1	3	4	5	0	1	2	4	2	4	2	3	5	5	1	4	8	12	21	2	0	1	0	2	3	1	4	3	0	3	4	4	2
CUT406	CUT406	CUT406	16	6	4	119	97	103	126	26	23	71	3	46	9	21	18	40	27	36	12	20	15	24	38	48	17	10	4	81	98	91	11	11	10	17	41	21	32	37	47	20	25	23	46	50	33	21	31
CUT407	CUT407	CUT407	0	2	3	9	11	11	86	32	33	6	0	8	1	1	3	7	1	2	1	2	0	2	3	4	0	3	3	6	11	10	7	13	15	1	0	4	4	2	8	3	1	1	4	5	0	2	2
CUT408	CUT408	CUT408	2	1	4	9	5	11	258	53	52	23	0	27	2	3	1	13	0	5	0	3	2	4	2	8	2	2	4	6	5	10	22	22	24	6	0	13	7	5	3	6	0	3	0	8	4	4	2
CUT409	CUT409	CUT409	1	0	1	3	2	3	60	19	27	5	0	4	0	1	0	3	4	1	1	0	0	1	1	3	1	0	1	2	2	3	5	8	12	1	0	2	0	2	0	1	4	1	4	0	0	1	1
CUT410	CUT410	CUT410	113	100	168	482	222	241	970	177	117	242	6	289	56	124	52	441	150	271	67	57	80	267	185	330	121	171	167	328	225	213	84	74	53	60	82	135	199	216	136	217	138	170	257	143	176	237	153
CUT411	CUT411	CUT411	1	0	0	3	2	0	54	12	13	8	0	7	0	2	0	1	0	0	0	2	2	0	2	2	1	0	0	2	2	0	5	5	6	2	0	3	0	3	0	0	0	0	0	5	4	0	2
CUT412	CUT412	CUT412	1	0	0	0	1	1	28	8	13	3	0	3	0	1	0	1	1	0	1	1	2	3	0	2	1	0	0	0	1	1	2	3	6	1	0	1	0	2	0	0	1	0	4	3	4	3	0
CUT413	CUT413	CUT413	380	218	431	606	490	480	1746	498	395	1371	21	986	108	244	164	1232	933	1620	139	131	194	931	1008	1598	408	372	429	413	496	424	151	207	180	338	287	460	383	425	429	606	861	1018	534	329	427	827	831
CUT414	CUT414	CUT414	0	1	4	1	0	1	38	16	20	6	0	2	0	1	2	2	0	0	0	1	0	0	0	1	0	2	4	1	0	1	3	7	9	1	0	1	0	2	5	1	0	0	0	3	0	0	0
CUT415	CUT415	CUT415	8	7	7	11	7	3	300	68	73	32	2	8	2	2	2	18	2	5	0	5	2	6	3	11	9	12	7	7	7	3	26	28	33	8	27	4	7	3	5	9	2	3	0	13	4	5	2
CUT416	CUT416	CUT416	0	0	0	1	0	1	14	3	5	2	0	0	0	0	0	1	0	2	0	0	0	1	0	3	0	0	0	1	0	1	1	1	2	0	0	0	0	0	0	0	0	1	0	0	0	1	0
CUT417	CUT417	CUT417	2	2	1	2	0	0	46	32	49	11	0	1	0	1	0	5	1	2	0	1	1	1	2	0	2	3	1	1	0	0	4	13	22	3	0	0	0	2	0	2	1	1	0	3	2	1	2
CUT418	CUT418	CUT418	2	2	2	3	2	5	98	22	20	29	0	5	1	2	0	13	5	7	1	0	3	5	11	8	2	3	2	2	2	4	8	9	9	7	0	2	4	3	0	6	5	4	4	0	7	4	9
CUT419	CUT419	CUT419	0	1	0	6	2	2	52	34	58	3	0	3	0	2	0	6	0	4	0	1	0	3	3	1	0	2	0	4	2	2	4	14	26	1	0	1	0	3	0	3	0	3	0	3	0	3	2
CUT420	CUT420	CUT420	3	0	3	11	8	13	90	50	28	30	0	23	0	7	0	12	3	4	2	0	1	8	4	6	3	0	3	7	8	11	8	21	13	7	0	11	0	12	0	6	3	3	8	0	2	7	3
CUT421	CUT421	CUT421	15	15	21	45	34	32	184	49	47	49	1	21	2	11	3	23	16	47	9	7	7	21	34	46	16	26	21	31	34	28	16	20	21	12	14	10	7	19	8	11	15	30	35	18	15	19	28
CUT422	CUT422	CUT422	1	2	0	3	0	1	50	28	50	5	0	2	0	0	0	7	0	3	0	1	0	2	1	3	1	3	0	2	0	1	4	12	23	1	0	1	0	0	0	3	0	2	0	3	0	2	1
CUT423	CUT423	CUT423	5	2	2	16	7	15	202	64	53	39	0	32	4	5	0	15	2	11	3	7	0	3	6	11	5	3	2	11	7	13	17	27	24	10	0	15	14	9	0	7	2	7	12	18	0	3	5
CUT424	CUT424	CUT424	1	1	1	0	2	1	42	17	25	3	0	2	0	0	0	2	0	2	0	1	0	2	2	4	1	2	1	0	2	1	4	7	11	1	0	1	0	0	0	1	0	1	0	3	0	2	2
CUT425	CUT425	CUT425	1	0	1	16	9	7	36	5	17	21	2	8	2	10	10	15	5	12	1	3	8	16	6	9	1	0	1	11	9	6	3	2	8	5	27	4	7	17	26	7	5	8	4	8	18	14	5
CUT426	CUT426	CUT426	13	2	5	26	23	33	114	15	13	65	4	41	5	7	5	41	20	20	2	7	6	22	13	30	14	3	5	18	23	29	10	6	6	16	55	19	18	12	13	20	18	13	8	18	13	20	11
CUT427	CUT427	CUT427	2	3	5	12	19	4	146	32	27	27	0	12	0	0	0	6	0	5	1	0	2	4	8	2	2	5	5	8	19	4	13	13	12	7	0	6	0	0	0	3	0	3	4	0	4	4	7
CUT428	CUT428	CUT428	1	1	1	5	3	5	22	7	23	4	0	1	0	1	0	3	1	1	0	0	0	1	0	3	1	2	1	3	3	4	2	3	10	1	0	0	0	2	0	1	1	1	0	0	0	1	0
CUT429	CUT429	CUT429	2	0	1	11	4	4	62	11	9	15	0	11	1	2	1	7	4	5	0	0	2	3	3	2	2	0	1	7	4	4	5	5	4	4	0	5	4	3	3	3	4	3	0	0	4	3	2
CUT430	CUT430	CUT430	0	1	2	0	2	0	78	13	12	7	1	2	0	1	1	2	1	0	0	0	0	2	2	1	0	2	2	0	2	0	7	5	5	2	14	1	0	2	3	1	1	0	0	0	0	2	2
CUT431	CUT431	CUT431	2	1	3	7	8	14	72	17	14	5	0	10	1	4	0	7	2	7	2	0	4	2	3	5	2	2	3	5	8	12	6	7	6	1	0	5	4	7	0	3	2	4	8	0	9	2	2
CUT432	CUT432	CUT432	9	4	10	17	12	18	380	104	116	43	0	22	2	1	0	14	8	11	0	2	5	9	10	16	10	7	10	12	12	16	33	43	53	11	0	10	7	2	0	7	7	7	0	5	11	8	8
CUT433	CUT433	CUT433	1	3	12	1	1	2	148	41	56	7	0	13	0	0	1	8	0	4	1	0	0	2	1	3	1	5	12	1	1	2	13	17	25	2	0	6	0	0	3	4	0	3	4	0	0	2	1
CUT434	CUT434	CUT434	1	2	2	7	6	2	184	52	62	6	0	2	1	1	2	5	2	2	0	2	0	0	1	1	1	3	2	5	6	2	16	22	28	1	0	1	4	2	5	2	2	1	0	5	0	0	1
CUT435	CUT435	CUT435	3	2	1	11	8	11	78	22	27	19	0	13	2	4	1	7	2	5	1	3	3	5	6	8	3	3	1	7	8	10	7	9	12	5	0	6	7	7	3	3	2	3	4	8	7	4	5
CUT436	CUT436	CUT436	0	1	0	0	0	0	2	1	2	0	0	0	0	0	0	1	0	0	0	0	0	0	0	1	0	2	0	0	0	0	0	0	1	0	0	0	0	0	0	0	0	0	0	0	0	0	0
CUT437	CUT437	CUT437	0	2	2	0	0	0	70	26	49	4	0	2	0	2	3	3	3	0	0	1	0	0	0	1	0	3	2	0	0	0	6	11	22	1	0	1	0	3	8	1	3	0	0	3	0	0	0
CUT438	CUT438	CUT438	1	0	0	3	2	2	24	16	17	14	0	2	0	1	0	7	1	4	0	3	1	2	3	5	1	0	0	2	2	2	2	7	8	3	0	1	0	2	0	3	1	3	0	8	2	2	2
CUT439	CUT439	CUT439	0	0	0	2	0	0	30	16	27	6	0	1	0	1	2	2	1	2	0	0	0	1	0	5	0	0	0	1	0	0	3	7	12	1	0	0	0	2	5	1	1	1	0	0	0	1	0
CUT440	CUT440	CUT440	0	0	1	1	3	0	18	11	6	2	0	0	0	1	0	2	0	0	0	0	2	0	1	1	0	0	1	1	3	0	2	5	3	0	0	0	0	2	0	1	0	0	0	0	4	0	1
CUT441	CUT441	CUT441	0	1	1	4	2	2	46	21	23	8	0	1	2	3	0	2	1	0	1	0	1	3	2	3	0	2	1	3	2	2	4	9	10	2	0	0	7	5	0	1	1	0	4	0	2	3	2
CUT442	CUT442	CUT442	1	3	2	8	3	7	114	21	19	19	0	15	0	3	3	11	4	7	0	1	9	3	4	9	1	5	2	5	3	6	10	9	9	5	0	7	0	5	8	5	4	4	0	3	20	3	3
CUT443	CUT443	CUT443	0	0	0	1	0	2	6	4	4	1	0	1	0	0	0	1	1	1	0	0	1	0	0	0	0	0	0	1	0	2	1	2	2	0	0	0	0	0	0	0	1	1	0	0	2	0	0
CUT444	CUT444	CUT444	0	0	0	0	0	0	24	5	23	3	0	2	0	0	0	1	0	2	0	0	1	0	0	2	0	0	0	0	0	0	2	2	10	1	0	1	0	0	0	0	0	1	0	0	2	0	0
CUT445	CUT445	CUT445	5	1	1	5	1	2	52	8	4	15	0	15	3	6	2	8	5	8	5	5	2	9	7	14	5	2	1	3	1	2	4	3	2	4	0	7	11	10	5	4	5	5	19	13	4	8	6
CUT446	CUT446	CUT446	0	1	1	0	1	0	8	14	21	1	0	1	0	0	0	0	0	2	0	0	0	1	0	2	0	2	1	0	1	0	1	6	10	0	0	0	0	0	0	0	0	1	0	0	0	1	0
CUT447	CUT447	CUT447	1	2	6	0	1	0	76	36	56	10	0	2	0	4	1	5	3	0	1	0	1	2	1	1	1	3	6	0	1	0	7	15	25	2	0	1	0	7	3	2	3	0	4	0	2	2	1
CUT448	CUT448	CUT448	1	2	2	0	2	1	54	24	33	7	0	3	0	0	0	4	2	2	1	1	0	3	1	0	1	3	2	0	2	1	5	10	15	2	0	1	0	0	0	2	2	1	4	3	0	3	1
CUT449	CUT449	CUT449	1	3	4	2	2	3	138	45	61	10	0	2	0	1	1	6	4	5	1	0	0	3	2	3	1	5	4	1	2	3	12	19	28	2	0	1	0	2	3	3	4	3	4	0	0	3	2
CUT450	CUT450	CUT450	6	3	2	14	13	6	86	16	13	18	0	14	1	5	1	7	10	11	1	2	3	5	4	8	6	5	2	10	13	5	7	7	6	4	0	7	4	9	3	3	9	7	4	5	7	4	3
CUT451	CUT451	CUT451	29	9	21	110	96	107	334	43	52	88	0	51	14	25	10	89	35	57	11	21	28	46	50	64	31	15	21	75	97	95	29	18	24	22	0	24	50	44	26	44	32	36	42	53	62	41	41
CUT452	CUT452	CUT452	84	50	104	464	491	415	1008	231	158	294	6	290	29	43	53	238	204	317	31	43	58	146	240	328	90	85	103	316	497	367	87	96	72	72	82	135	103	75	139	117	188	199	119	108	128	130	198
CUT453	CUT453	CUT453	2	3	2	5	5	4	162	57	65	11	0	6	0	0	1	7	3	2	0	1	2	1	4	3	2	5	2	3	5	4	14	24	30	3	0	3	0	0	3	3	3	1	0	3	4	1	3
CUT454	CUT454	CUT454	0	0	0	0	1	1	22	10	7	2	0	2	0	1	0	1	0	0	0	1	0	0	0	2	0	0	0	0	1	1	2	4	3	0	0	1	0	2	0	0	0	0	0	3	0	0	0
CUT455	CUT455	CUT455	1	1	1	4	3	2	78	18	23	14	0	4	0	2	2	4	3	5	2	0	0	2	1	4	1	2	1	3	3	2	7	7	10	3	0	2	0	3	5	2	3	3	8	0	0	2	1
CUT456	CUT456	CUT456	10	5	2	6	1	4	170	28	51	13	0	68	0	1	0	5	3	1	1	0	0	1	2	5	11	9	2	4	1	4	15	12	23	3	0	32	0	2	0	2	3	1	4	0	0	1	2
CUT457	CUT457	CUT457	0	0	0	0	1	0	18	9	10	4	0	0	0	1	2	2	1	1	0	0	0	0	0	3	0	0	0	0	1	0	2	4	5	1	0	0	0	2	5	1	1	1	0	0	0	0	0
CUT458	CUT458	CUT458	0	0	3	1	0	0	120	33	24	1	0	1	0	2	0	1	2	1	0	0	0	0	0	0	0	0	3	1	0	0	10	14	11	0	0	0	0	3	0	0	2	1	0	0	0	0	0
CUT459	CUT459	CUT459	22	9	11	48	54	56	676	161	129	188	5	114	8	19	17	68	37	60	12	12	12	31	32	70	24	15	11	33	55	50	58	67	59	46	68	53	28	33	45	33	34	38	46	30	26	28	26
CUT460	CUT460	CUT460	14	6	9	17	5	11	306	74	77	47	1	31	3	9	10	10	11	7	2	6	9	10	11	13	15	10	9	12	5	10	26	31	35	12	14	14	11	16	26	5	10	4	8	15	20	9	9
CUT461	CUT461	CUT461	8	0	3	6	0	3	76	31	31	13	0	3	2	2	3	2	1	5	0	5	3	2	4	9	9	0	3	4	0	3	7	13	14	3	0	1	7	3	8	1	1	3	0	13	7	2	3
CUT462	CUT462	CUT462	2	0	4	3	1	7	62	21	10	12	0	9	2	2	0	5	2	0	0	1	0	3	2	3	2	0	4	2	1	6	5	9	5	3	0	4	7	3	0	2	2	0	0	3	0	3	2
CUT463	CUT463	CUT463	4	3	8	20	19	16	90	17	24	36	0	18	1	3	2	10	8	12	1	6	5	6	8	15	4	5	8	14	19	14	8	7	11	9	0	8	4	5	5	5	7	8	4	15	11	5	7
CUT464	CUT464	CUT464	27	11	24	139	170	162	256	35	17	120	3	45	7	17	7	55	27	51	8	7	8	36	44	46	29	19	24	95	172	143	22	15	8	30	41	21	25	30	18	27	25	32	31	18	18	32	36
CUT465	CUT465	CUT465	54	27	67	181	87	101	1482	194	197	265	3	125	14	34	19	93	41	68	10	23	19	40	52	70	58	46	67	123	88	89	128	81	90	65	41	58	50	59	50	46	38	43	38	58	42	36	43
CUT466	CUT466	CUT466	2	3	5	8	7	10	94	24	31	16	0	5	0	3	0	0	8	11	0	1	1	3	8	10	2	5	5	5	7	9	8	10	14	4	0	2	0	5	0	0	7	7	0	3	2	3	7
CUT467	CUT467	CUT467	0	1	1	2	0	0	16	22	23	2	0	0	0	0	0	2	0	1	0	0	0	0	1	0	0	2	1	1	0	0	1	9	10	0	0	0	0	0	0	1	0	1	0	0	0	0	1
CUT468	CUT468	CUT468	2	2	2	3	3	3	82	26	39	10	0	7	0	0	1	8	2	2	0	2	0	0	4	4	2	3	2	2	3	3	7	11	18	2	0	3	0	0	3	4	2	1	0	5	0	0	3
CUT469	CUT469	CUT469	2	1	4	1	0	1	40	16	26	3	0	8	0	1	0	2	2	2	1	0	0	0	3	4	2	2	4	1	0	1	3	7	12	1	0	4	0	2	0	1	2	1	4	0	0	0	2
CUT470	CUT470	CUT470	0	0	0	2	3	1	12	5	7	1	0	1	0	4	0	7	1	0	0	0	1	1	4	2	0	0	0	1	3	1	1	2	3	0	0	0	0	7	0	3	1	0	0	0	2	1	3
CUT471	CUT471	CUT471	0	0	1	1	2	1	16	10	10	3	0	4	0	1	0	0	0	2	0	0	0	0	1	2	0	0	1	1	2	1	1	4	5	1	0	2	0	2	0	0	0	1	0	0	0	0	1
CUT472	CUT472	CUT472	0	1	1	3	3	5	10	2	9	3	0	4	0	2	0	2	1	1	1	0	0	3	0	1	0	2	1	2	3	4	1	1	4	1	0	2	0	3	0	1	1	1	4	0	0	3	0
CUT473	CUT473	CUT473	0	0	5	9	4	3	70	11	22	7	0	5	1	0	2	6	3	2	1	0	1	3	3	4	0	0	5	6	4	3	6	5	10	2	0	2	4	0	5	3	3	1	4	0	2	3	2
CUT474	CUT474	CUT474	1	1	2	3	4	8	68	14	16	8	0	2	1	2	0	10	4	2	2	1	2	1	3	5	1	2	2	2	4	7	6	6	7	2	0	1	4	3	0	5	4	1	8	3	4	1	2
CUT475	CUT475	CUT475	0	1	2	9	3	6	86	30	29	17	0	8	3	2	3	12	5	12	0	0	2	3	6	9	0	2	2	6	3	5	7	12	13	4	0	4	11	3	8	6	5	8	0	0	4	3	5
CUT476	CUT476	CUT476	2	1	1	4	2	2	62	32	27	8	0	6	1	2	1	4	1	1	0	0	0	2	1	6	2	2	1	3	2	2	5	13	12	2	0	3	4	3	3	2	1	1	0	0	0	2	1
CUT477	CUT477	CUT477	2	6	6	40	15	14	20	6	3	14	1	3	0	2	1	7	5	11	1	1	4	2	8	6	2	10	6	27	15	12	2	2	1	3	14	1	0	3	3	3	5	7	4	3	9	2	7
CUT478	CUT478	CUT478	4	5	9	34	13	18	82	21	17	20	0	28	4	8	4	39	16	17	2	4	5	20	9	31	4	9	9	23	13	16	7	9	8	5	0	13	14	14	10	19	15	11	8	10	11	18	7
CUT479	CUT479	CUT479	5	2	10	12	9	15	208	136	150	62	0	30	13	14	7	45	22	30	9	6	17	31	24	38	5	3	10	8	9	13	18	57	68	15	0	14	46	24	18	22	20	19	35	15	37	28	20
CUT480	CUT480	CUT480	1	2	6	20	11	23	70	20	28	45	0	32	12	11	9	35	9	27	7	5	15	23	20	32	1	3	6	14	11	20	6	8	13	11	0	15	43	19	24	17	8	17	27	13	33	20	16
CUT481	CUT481	CUT481	2	3	2	2	1	1	130	81	82	13	0	7	0	1	1	3	2	1	0	0	0	4	3	5	2	5	2	1	1	1	11	34	37	3	0	3	0	2	3	1	2	1	0	0	0	4	2
CUT482	CUT482	CUT482	1	1	2	5	2	5	130	23	29	15	0	7	1	1	2	11	3	2	0	0	1	3	1	4	1	2	2	3	2	4	11	10	13	4	0	3	4	2	5	5	3	1	0	0	2	3	1
CUT483	CUT483	CUT483	1	0	0	0	1	1	16	17	23	3	0	0	0	0	4	9	0	5	1	1	0	2	2	10	1	0	0	0	1	1	1	7	10	1	0	0	0	0	10	4	0	3	4	3	0	2	2
CUT484	CUT484	CUT484	3088	1769	3022	1759	1041	1112	53604	9785	8707	10819	155	5452	366	719	530	3564	2709	6212	337	549	512	2125	3864	4731	3312	3022	3006	1199	1053	983	4621	4075	3957	2666	2116	2544	1298	1252	1388	1752	2500	3905	1294	1381	1126	1888	3186
CUT485	CUT485	CUT485	52	38	85	119	118	95	808	184	149	314	9	96	18	41	38	137	95	189	23	34	33	113	124	162	56	65	85	81	119	84	70	77	68	77	123	45	64	71	99	67	88	119	88	85	73	100	102
CUT486	CUT486	CUT486	0	1	1	0	0	0	28	11	6	7	0	4	1	0	0	1	2	0	0	1	2	4	0	4	0	2	1	0	0	0	2	5	3	2	0	2	4	0	0	0	2	0	0	3	4	4	0
CUT487	CUT487	CUT487	0	1	2	2	0	0	12	13	17	1	1	0	0	0	0	4	0	1	0	0	0	2	3	0	0	2	2	1	0	0	1	5	8	0	14	0	0	0	0	2	0	1	0	0	0	2	2
CUT488	CUT488	CUT488	24	3	11	8	14	22	86	14	18	88	0	29	1	4	9	37	22	39	2	7	10	5	22	36	26	5	11	5	14	19	7	6	8	22	0	14	4	7	24	18	20	25	8	18	22	4	18
CUT489	CUT489	CUT489	2	4	0	6	6	5	90	91	76	7	0	4	0	1	0	11	6	5	0	1	1	4	3	8	2	7	0	4	6	4	8	38	35	2	0	2	0	2	0	5	6	3	0	3	2	4	2
CUT490	CUT490	CUT490	2	0	2	5	2	9	22	10	17	8	0	1	0	5	2	8	2	5	0	2	1	4	1	4	2	0	2	3	2	8	2	4	8	2	0	0	0	9	5	4	2	3	0	5	2	4	1
CUT491	CUT491	CUT491	1	0	3	4	0	0	70	30	34	5	0	8	0	1	1	5	2	3	0	0	1	2	0	6	1	0	3	3	0	0	6	12	15	1	0	4	0	2	3	2	2	2	0	0	2	2	0
CUT492	CUT492	CUT492	2	2	0	2	4	5	30	5	6	5	0	3	0	1	0	2	1	0	0	0	0	1	1	2	2	3	0	1	4	4	3	2	3	1	0	1	0	2	0	1	1	0	0	0	0	1	1
CUT493	CUT493	CUT493	2	2	1	13	13	17	116	18	26	83	1	39	4	8	4	24	12	20	2	1	3	7	8	17	2	3	1	9	13	15	10	7	12	20	14	18	14	14	10	12	11	13	8	3	7	6	7
CUT494	CUT494	CUT494	9	3	8	29	12	22	298	77	78	46	2	17	1	5	3	20	11	6	3	8	2	16	5	10	10	5	8	20	12	19	26	32	35	11	27	8	4	9	8	10	10	4	12	20	4	14	4
CUT495	CUT495	CUT495	127	54	107	324	368	332	1130	235	228	534	8	207	27	77	49	164	110	212	42	73	73	100	164	213	136	92	106	221	372	294	97	98	104	132	109	97	96	134	128	81	102	133	161	184	161	89	135
CUT496	CUT496	CUT496	3978	1895	3489	2738	2385	2951	22218	4006	4240	9540	201	6095	487	1066	685	5497	4360	8405	430	764	1007	2753	5519	7214	4266	3238	3470	1866	2412	2609	1915	1668	1927	2351	2745	2844	1727	1856	1793	2702	4023	5283	1651	1921	2215	2446	4550
CUT497	CUT497	CUT497	23	6	6	7	12	9	64	25	30	46	0	23	2	2	1	23	22	43	1	4	2	6	34	42	25	10	6	5	12	8	6	10	14	11	0	11	7	3	3	11	20	27	4	10	4	5	28
CUT498	CUT498	CUT498	1	0	2	2	7	8	44	18	16	11	0	5	0	0	1	3	2	3	0	1	1	1	4	6	1	0	2	1	7	7	4	7	7	3	0	2	0	0	3	1	2	2	0	3	2	1	3
CUT499	CUT499	CUT499	2	0	2	17	12	19	54	15	30	6	0	6	3	2	2	6	3	3	0	2	2	2	7	9	2	0	2	12	12	17	5	6	14	1	0	3	11	3	5	3	3	2	0	5	4	2	6
CUT500	CUT500	CUT500	2	0	0	9	4	8	82	15	25	14	0	10	1	1	1	8	2	3	1	0	1	5	2	8	2	0	0	6	4	7	7	6	11	3	0	5	4	2	3	4	2	2	4	0	2	4	2
CUT501	CUT501	CUT501	3	2	3	14	13	12	266	52	35	19	0	23	4	7	2	7	3	3	2	1	6	2	2	9	3	3	3	10	13	11	23	22	16	5	0	11	14	12	5	3	3	2	8	3	13	2	2
CUT502	CUT502	CUT502	5	3	2	54	43	39	274	48	44	55	2	67	5	12	5	36	22	15	3	9	4	10	17	41	5	5	2	37	43	34	24	20	20	14	27	31	18	21	13	18	20	9	12	23	9	9	14
CUT503	CUT503	CUT503	0	2	9	13	5	9	252	57	62	9	1	7	1	0	4	4	3	2	0	4	1	2	1	3	0	3	9	9	5	8	22	24	28	2	14	3	4	0	10	2	3	1	0	10	2	2	1
CUT504	CUT504	CUT504	4	1	2	14	9	8	70	41	39	21	0	7	2	4	2	14	5	5	2	1	2	5	6	8	4	2	2	10	9	7	6	17	18	5	0	3	7	7	5	7	5	3	8	3	4	4	5
CUT505	CUT505	CUT505	0	0	0	1	0	0	18	14	18	2	0	1	0	0	0	0	1	0	0	0	1	0	0	1	0	0	0	1	0	0	2	6	8	0	0	0	0	0	0	0	1	0	0	0	2	0	0
CUT506	CUT506	CUT506	2	6	5	18	15	13	302	63	46	20	1	30	2	3	3	17	4	9	2	4	1	8	5	10	2	10	5	12	15	11	26	26	21	5	14	14	7	5	8	8	4	6	8	10	2	7	4
CUT507	CUT507	CUT507	3	3	4	6	7	5	180	51	44	10	0	22	2	3	3	14	3	7	1	3	0	8	5	10	3	5	4	4	7	4	16	21	20	2	0	10	7	5	8	7	3	4	4	8	0	7	4
CUT508	CUT508	CUT508	1	0	0	0	0	0	22	5	3	2	0	0	0	1	1	2	2	3	0	1	0	2	4	0	1	0	0	0	0	0	2	2	1	0	0	0	0	2	3	1	2	2	0	3	0	2	3
CUT509	CUT509	CUT509	42	33	53	131	148	142	536	137	115	322	8	170	17	37	25	142	98	162	29	32	41	122	111	174	45	56	53	89	150	126	46	57	52	79	109	79	60	64	65	70	90	102	111	80	90	108	92
CUT510	CUT510	CUT510	1	1	3	4	1	0	30	40	43	2	0	3	0	1	0	4	3	6	0	1	1	4	0	3	1	2	3	3	1	0	3	17	20	0	0	1	0	2	0	2	3	4	0	3	2	4	0
CUT511	CUT511	CUT511	4	2	3	2	1	4	58	16	12	14	0	11	0	2	1	8	2	0	0	1	2	1	1	3	4	3	3	1	1	4	5	7	5	3	0	5	0	3	3	4	2	0	0	3	4	1	1
CUT512	CUT512	CUT512	1	0	2	1	1	1	12	4	4	1	0	2	0	0	0	1	1	0	0	0	0	1	0	1	1	0	2	1	1	1	1	2	2	0	0	1	0	0	0	0	1	0	0	0	0	1	0
CUT513	CUT513	CUT513	0	0	3	1	0	1	20	6	9	2	0	1	0	0	0	1	1	0	0	1	0	1	0	0	0	0	3	1	0	1	2	2	4	0	0	0	0	0	0	0	1	0	0	3	0	1	0
CUT514	CUT514	CUT514	8	5	8	8	7	10	308	38	30	62	0	37	1	3	2	11	10	15	3	3	6	9	12	13	9	9	8	5	7	9	27	16	14	15	0	17	4	5	5	5	9	9	12	8	13	8	10
CUT515	CUT515	CUT515	0	1	8	2	2	1	142	126	150	3	0	2	1	0	1	11	5	3	0	0	0	5	1	7	0	2	8	1	2	1	12	52	68	1	0	1	4	0	3	5	5	2	0	0	0	4	1
CUT516	CUT516	CUT516	3	0	7	6	6	10	182	42	56	22	0	10	2	5	1	15	6	6	0	4	2	6	6	3	3	0	7	4	6	9	16	17	25	5	0	5	7	9	3	7	6	4	0	10	4	5	5
CUT517	CUT517	CUT517	0	1	1	0	0	1	22	21	32	2	0	0	0	0	1	2	2	2	0	1	0	0	0	3	0	2	1	0	0	1	2	9	15	0	0	0	0	0	3	1	2	1	0	3	0	0	0
CUT518	CUT518	CUT518	0	1	1	0	0	0	36	6	8	1	0	0	0	0	0	2	0	0	0	0	0	1	0	0	0	2	1	0	0	0	3	2	4	0	0	0	0	0	0	1	0	0	0	0	0	1	0
CUT519	CUT519	CUT519	1	1	1	2	4	4	12	9	5	12	0	4	1	2	0	2	3	3	0	1	4	1	1	5	1	2	1	1	4	4	1	4	2	3	0	2	4	3	0	1	3	2	0	3	9	1	1
CUT520	CUT520	CUT520	0	0	1	0	0	1	4	11	14	0	0	0	0	0	1	1	0	0	0	0	0	2	0	1	0	0	1	0	0	1	0	5	6	0	0	0	0	0	3	0	0	0	0	0	0	2	0
CUT521	CUT521	CUT521	25	14	12	86	80	63	312	72	63	113	4	68	5	17	4	41	24	41	7	14	10	19	39	59	27	24	12	59	81	56	27	30	29	28	55	32	18	30	10	20	22	26	27	35	22	17	32
CUT522	CUT522	CUT522	2	2	2	0	0	1	64	13	20	3	0	5	0	0	0	2	1	0	1	0	1	2	2	2	2	3	2	0	0	1	6	5	9	1	0	2	0	0	0	1	1	0	4	0	2	2	2
CUT523	CUT523	CUT523	2	3	3	0	0	4	84	53	31	3	0	7	1	0	0	3	0	1	0	0	1	0	1	2	2	5	3	0	0	4	7	22	14	1	0	3	4	0	0	1	0	1	0	0	2	0	1
CUT524	CUT524	CUT524	5	2	8	5	5	3	130	46	59	6	0	6	2	3	2	6	5	7	2	0	1	1	6	8	5	3	8	3	5	3	11	19	27	1	0	3	7	5	5	3	5	4	8	0	2	1	5
CUT525	CUT525	CUT525	51	32	71	177	68	92	690	147	122	336	4	207	73	131	61	196	118	173	59	51	83	113	120	210	55	55	71	121	69	81	59	61	55	83	55	97	259	228	160	96	109	109	227	128	183	100	99
CUT526	CUT526	CUT526	6	1	3	22	22	14	244	48	44	55	1	29	2	4	4	15	4	9	2	3	4	11	7	14	6	2	3	15	22	12	21	20	20	14	14	14	7	7	10	7	4	6	8	8	9	10	6
CUT527	CUT527	CUT527	0	1	1	1	5	4	38	12	17	16	0	8	1	0	2	5	6	7	2	2	0	0	3	7	0	2	1	1	5	4	3	5	8	4	0	4	4	0	5	2	6	4	8	5	0	0	2
CUT528	CUT528	CUT528	1	1	1	3	1	3	36	22	28	1	0	2	1	0	0	2	2	0	0	0	1	2	2	3	1	2	1	2	1	3	3	9	13	0	0	1	4	0	0	1	2	0	0	0	2	2	2
CUT529	CUT529	CUT529	74	52	79	115	94	96	1160	238	237	344	2	182	13	33	30	99	60	80	13	32	26	45	63	113	79	89	79	78	95	85	100	99	108	85	27	85	46	57	79	49	55	50	50	80	57	40	52
CUT530	CUT530	CUT530	7	4	8	29	19	18	160	21	22	82	2	36	4	9	5	24	10	17	4	7	5	14	26	23	8	7	8	20	19	16	14	9	10	20	27	17	14	16	13	12	9	11	15	18	11	12	21
CUT531	CUT531	CUT531	1	0	0	0	0	0	12	4	3	0	0	1	0	0	0	1	0	1	0	0	0	1	0	0	1	0	0	0	0	0	1	2	1	0	0	0	0	0	0	0	0	1	0	0	0	1	0
CUT532	CUT532	CUT532	1	1	6	7	1	1	62	42	53	4	0	3	1	0	1	6	1	4	1	0	0	3	3	7	1	2	6	5	1	1	5	17	24	1	0	1	4	0	3	3	1	3	4	0	0	3	2
CUT533	CUT533	CUT533	0	0	0	2	4	0	28	6	1	5	0	4	0	0	0	2	0	0	0	0	0	1	0	1	0	0	0	1	4	0	2	2	0	1	0	2	0	0	0	1	0	0	0	0	0	1	0
CUT534	CUT534	CUT534	1	0	0	2	3	0	28	23	31	3	0	3	0	0	0	1	0	1	0	0	0	0	0	2	1	0	0	1	3	0	2	10	14	1	0	1	0	0	0	0	0	1	0	0	0	0	0
CUT535	CUT535	CUT535	0	0	0	1	1	0	38	8	14	4	0	3	0	0	0	1	0	2	1	0	0	1	2	0	0	0	0	1	1	0	3	3	6	1	0	1	0	0	0	0	0	1	4	0	0	1	2
CUT536	CUT536	CUT536	0	0	0	1	0	0	22	12	18	4	0	4	0	0	0	1	0	3	1	0	0	1	1	0	0	0	0	1	0	0	2	5	8	1	0	2	0	0	0	0	0	2	4	0	0	1	1
CUT537	CUT537	CUT537	13	7	9	19	4	6	504	125	111	54	1	118	6	4	3	30	9	16	1	5	4	5	18	27	14	12	9	13	4	5	43	52	50	13	14	55	21	7	8	15	8	10	4	13	9	4	15
CUT538	CUT538	CUT538	7	6	20	102	102	94	382	30	21	105	2	69	6	20	9	29	40	56	6	9	8	26	45	47	8	10	20	69	103	83	33	12	10	26	27	32	21	35	24	14	37	35	23	23	18	23	37
CUT539	CUT539	CUT539	1	2	4	11	6	4	96	18	28	7	0	6	2	3	2	1	4	8	1	1	0	6	7	11	1	3	4	7	6	4	8	7	13	2	0	3	7	5	5	0	4	5	4	3	0	5	6
CUT540	CUT540	CUT540	0	0	1	0	0	3	26	0	2	4	0	4	1	4	0	7	4	1	2	1	0	1	5	7	0	0	1	0	0	3	2	0	1	1	0	2	4	7	0	3	4	1	8	3	0	1	4
CUT541	CUT541	CUT541	0	4	2	3	1	0	60	19	18	6	0	2	0	0	1	6	2	0	1	1	1	1	0	3	0	7	2	2	1	0	5	8	8	1	0	1	0	0	3	3	2	0	4	3	2	1	0
CUT542	CUT542	CUT542	2	4	6	3	0	1	142	75	110	8	0	3	2	0	2	10	2	0	0	1	1	1	1	5	2	7	6	2	0	1	12	31	50	2	0	1	7	0	5	5	2	0	0	3	2	1	1
CUT543	CUT543	CUT543	2	3	2	0	2	3	40	32	32	3	0	0	0	0	1	2	2	1	0	0	0	0	2	1	2	5	2	0	2	3	3	13	15	1	0	0	0	0	3	1	2	1	0	0	0	0	2
CUT544	CUT544	CUT544	495	472	835	1044	908	962	4656	1288	1253	2473	46	1001	164	289	282	1243	917	1925	149	262	277	834	1275	1658	531	806	831	711	918	850	401	536	570	609	628	467	582	503	738	611	846	1210	572	659	609	741	1051
CUT545	CUT545	CUT545	1	1	0	0	0	1	12	9	19	0	0	0	1	0	0	0	0	0	0	0	0	0	0	1	1	2	0	0	0	1	1	4	9	0	0	0	4	0	0	0	0	0	0	0	0	0	0
CUT546	CUT546	CUT546	6	3	4	19	11	10	102	8	4	53	1	35	9	7	6	35	15	14	7	6	6	25	24	42	6	5	4	13	11	9	9	3	2	13	14	16	32	12	16	17	14	9	27	15	13	22	20
CUT547	CUT547	CUT547	1	0	0	1	1	0	10	4	9	1	0	0	0	0	0	0	2	0	0	0	1	0	0	0	1	0	0	1	1	0	1	2	4	0	0	0	0	0	0	0	2	0	0	0	2	0	0
CUT548	CUT548	CUT548	18	12	26	72	42	33	756	213	163	126	2	63	4	13	6	25	32	29	4	8	7	16	20	33	19	21	26	49	42	29	65	89	74	31	27	29	14	23	16	12	30	18	15	20	15	14	16
CUT549	CUT549	CUT549	1	0	2	1	2	4	48	13	12	8	0	6	0	0	0	1	0	3	0	2	0	0	0	1	1	0	2	1	2	4	4	5	5	2	0	3	0	0	0	0	0	2	0	5	0	0	0
CUT550	CUT550	CUT550	0	3	2	2	0	0	46	41	57	2	0	2	0	1	0	2	0	1	0	0	1	0	0	2	0	5	2	1	0	0	4	17	26	0	0	1	0	2	0	1	0	1	0	0	2	0	0
CUT551	CUT551	CUT551	83	74	83	173	71	103	948	165	152	278	10	200	54	77	49	292	147	250	45	39	46	219	140	249	89	126	83	118	72	91	82	69	69	69	137	93	192	134	128	144	136	157	173	98	101	195	115
CUT552	CUT552	CUT552	91	42	72	38	39	34	916	291	243	287	6	218	15	30	26	89	96	107	8	27	22	43	98	129	98	72	72	26	39	30	79	121	110	71	82	102	53	52	68	44	89	67	31	68	48	38	81
CUT553	CUT553	CUT553	5	5	4	6	6	14	166	36	23	21	1	44	7	4	5	20	5	9	0	7	7	4	6	16	5	9	4	4	6	12	14	15	10	5	14	21	25	7	13	10	5	6	0	18	15	4	5
CUT554	CUT554	CUT554	27	17	23	106	62	75	1014	153	135	163	1	63	11	35	32	72	38	54	15	25	33	62	52	78	29	29	23	72	63	66	87	64	61	40	14	29	39	61	84	35	35	34	58	63	73	55	43
CUT555	CUT555	CUT555	0	1	0	2	1	0	10	17	12	2	0	3	0	2	0	0	0	0	1	0	1	3	2	0	0	2	0	1	1	0	1	7	5	0	0	1	0	3	0	0	0	0	4	0	2	3	2
CUT556	CUT556	CUT556	0	1	6	8	3	3	56	16	14	7	0	15	5	10	1	12	3	14	5	2	7	4	4	11	0	2	6	5	3	3	5	7	6	2	0	7	18	17	3	6	3	9	19	5	15	4	3
CUT557	CUT557	CUT557	20	10	13	55	63	30	212	68	51	26	0	21	9	22	18	35	23	38	4	9	14	20	35	29	21	17	13	37	64	27	18	28	23	6	0	10	32	38	47	17	21	24	15	23	31	18	29
CUT558	CUT558	CUT558	0	0	1	1	1	2	42	16	12	3	0	4	0	0	0	1	0	2	0	0	0	2	2	2	0	0	1	1	1	2	4	7	5	1	0	2	0	0	0	0	0	1	0	0	0	2	2
CUT559	CUT559	CUT559	6	4	4	28	26	16	114	49	44	13	0	11	3	3	3	8	9	13	0	1	0	6	7	13	6	7	4	19	26	14	10	20	20	3	0	5	11	5	8	4	8	8	0	3	0	5	6
CUT560	CUT560	CUT560	11	6	13	16	25	19	346	92	80	35	0	23	1	3	1	8	21	17	0	3	3	6	15	10	12	10	13	11	25	17	30	38	36	9	0	11	4	5	3	4	19	11	0	8	7	5	12
CUT561	CUT561	CUT561	28	18	50	66	55	43	1838	423	294	134	4	124	11	15	6	56	32	31	6	8	11	27	41	34	30	31	50	45	56	38	158	176	134	33	55	58	39	26	16	28	30	19	23	20	24	24	34
CUT562	CUT562	CUT562	4	0	2	8	7	8	118	8	17	10	0	15	2	8	0	6	3	2	0	1	3	1	4	8	4	0	2	5	7	7	10	3	8	2	0	7	7	14	0	3	3	1	0	3	7	1	3
CUT563	CUT563	CUT563	0	3	1	0	0	0	40	31	45	3	0	0	0	0	0	2	0	0	0	0	0	0	0	2	0	5	1	0	0	0	3	13	20	1	0	0	0	0	0	1	0	0	0	0	0	0	0
CUT564	CUT564	CUT564	2	0	0	1	3	4	30	7	6	12	0	2	0	1	1	4	1	6	0	0	0	2	1	3	2	0	0	1	3	4	3	3	3	3	0	1	0	2	3	2	1	4	0	0	0	2	1
CUT565	CUT565	CUT565	0	0	3	0	0	2	40	6	7	1	0	1	0	0	0	1	0	0	1	1	1	0	0	0	0	0	3	0	0	2	3	2	3	0	0	0	0	0	0	0	0	0	4	3	2	0	0
CUT566	CUT566	CUT566	2	0	3	2	2	3	54	13	24	9	0	4	0	0	1	1	1	0	2	0	1	1	0	1	2	0	3	1	2	3	5	5	11	2	0	2	0	0	3	0	1	0	8	0	2	1	0
CUT567	CUT567	CUT567	1	4	6	0	0	0	48	18	15	18	0	32	0	1	1	3	0	2	0	1	0	4	1	5	1	7	6	0	0	0	4	7	7	4	0	15	0	2	3	1	0	1	0	3	0	4	1
CUT568	CUT568	CUT568	0	1	1	0	0	0	20	22	32	2	0	0	0	0	0	4	0	0	0	0	1	1	0	4	0	2	1	0	0	0	2	9	15	0	0	0	0	0	0	2	0	0	0	0	2	1	0
CUT569	CUT569	CUT569	8	5	6	5	7	14	134	20	22	42	1	23	0	5	4	19	12	16	2	5	7	7	13	19	9	9	6	3	7	12	12	8	10	10	14	11	0	9	10	9	11	10	8	13	15	6	11
CUT570	CUT570	CUT570	10	7	15	63	31	33	94	17	20	46	1	16	4	1	6	22	4	19	1	8	3	10	16	13	11	12	15	43	31	29	8	7	9	11	14	7	14	2	16	11	4	12	4	20	7	9	13
CUT571	CUT571	CUT571	1	2	2	3	2	1	42	37	41	3	0	0	0	0	0	7	0	4	0	0	1	4	3	6	1	3	2	2	2	1	4	15	19	1	0	0	0	0	0	3	0	3	0	0	2	4	2
CUT572	CUT572	CUT572	6	4	8	23	19	13	302	117	114	23	0	15	2	5	6	15	13	12	2	10	6	7	5	14	6	7	8	16	19	11	26	49	52	6	0	7	7	9	16	7	12	8	8	25	13	6	4
CUT573	CUT573	CUT573	5	0	1	4	4	6	110	12	9	55	0	17	1	8	3	23	10	10	2	3	1	12	10	22	5	0	1	3	4	5	9	5	4	14	0	8	4	14	8	11	9	6	8	8	2	11	8
CUT574	CUT574	CUT574	2	2	1	5	2	1	72	20	19	11	0	2	1	0	1	6	2	1	0	1	1	1	3	1	2	3	1	3	2	1	6	8	9	3	0	1	4	0	3	3	2	1	0	3	2	1	2
CUT575	CUT575	CUT575	0	1	1	7	7	6	40	18	15	13	0	2	0	4	0	5	1	3	0	0	2	0	6	1	0	2	1	5	7	5	3	7	7	3	0	1	0	7	0	2	1	2	0	0	4	0	5
CUT576	CUT576	CUT576	0	1	0	0	0	0	16	11	7	0	0	1	0	0	0	1	0	0	1	0	1	0	0	0	0	2	0	0	0	0	1	5	3	0	0	0	0	0	0	0	0	0	4	0	2	0	0
CUT577	CUT577	CUT577	1	1	2	2	4	5	84	17	23	8	0	4	1	0	0	7	4	1	2	2	0	4	2	5	1	2	2	1	4	4	7	7	10	2	0	2	4	0	0	3	4	1	8	5	0	4	2
CUT578	CUT578	CUT578	1	2	2	3	1	4	114	40	34	4	0	3	1	1	1	7	3	3	2	2	0	4	4	5	1	3	2	2	1	4	10	17	15	1	0	1	4	2	3	3	3	2	8	5	0	4	3
CUT579	CUT579	CUT579	0	2	0	1	0	1	22	16	21	6	0	2	0	3	1	7	1	2	0	0	0	4	3	4	0	3	0	1	0	1	2	7	10	1	0	1	0	5	3	3	1	1	0	0	0	4	2
CUT580	CUT580	CUT580	0	0	1	1	1	0	10	15	8	0	0	0	0	0	0	6	0	4	0	1	1	3	1	5	0	0	1	1	1	0	1	6	4	0	0	0	0	0	0	3	0	3	0	3	2	3	1
CUT581	CUT581	CUT581	1	0	3	14	12	10	168	33	39	17	0	13	1	5	1	11	2	5	1	3	3	8	3	8	1	0	3	10	12	9	14	14	18	4	0	6	4	9	3	5	2	3	4	8	7	7	2
CUT582	CUT582	CUT582	32	9	11	33	19	22	326	29	37	134	3	64	10	11	11	36	19	29	9	7	8	18	18	40	34	15	11	22	19	19	28	12	17	33	41	30	35	19	29	18	18	18	35	18	18	16	15
CUT583	CUT583	CUT583	1	1	1	2	5	4	76	41	51	11	1	17	0	1	1	4	2	2	0	0	1	6	2	5	1	2	1	1	5	4	7	17	23	3	14	8	0	2	3	2	2	1	0	0	2	5	2
CUT584	CUT584	CUT584	1	0	4	6	3	2	90	20	21	34	0	14	5	6	2	13	6	7	1	1	5	6	6	11	1	0	4	4	3	2	8	8	10	8	0	7	18	10	5	6	6	4	4	3	11	5	5
CUT585	CUT585	CUT585	2	3	1	5	1	1	176	74	83	6	1	5	0	3	0	6	1	1	0	2	0	2	1	8	2	5	1	3	1	1	15	31	38	1	14	2	0	5	0	3	1	1	0	5	0	2	1
CUT586	CUT586	CUT586	0	2	4	4	1	0	76	32	29	9	0	4	0	1	1	2	2	1	2	0	0	2	1	3	0	3	4	3	1	0	7	13	13	2	0	2	0	2	3	1	2	1	8	0	0	2	1
CUT587	CUT587	CUT587	1	2	1	2	0	1	62	32	39	9	0	4	1	3	0	9	4	6	0	0	2	5	2	4	1	3	1	1	0	1	5	13	18	2	0	2	4	5	0	4	4	4	0	0	4	4	2
CUT588	CUT588	CUT588	15	8	15	33	25	26	174	32	26	49	0	40	9	14	9	31	14	26	7	12	12	29	16	24	16	14	15	22	25	23	15	13	12	12	0	19	32	24	24	15	13	16	27	30	26	26	13
CUT589	CUT589	CUT589	6	1	4	11	9	8	50	5	2	20	0	24	0	1	4	5	7	8	1	0	0	7	3	13	6	2	4	7	9	7	4	2	1	5	0	11	0	2	10	2	6	5	4	0	0	6	2
CUT590	CUT590	CUT590	1	1	4	5	1	2	106	36	39	10	0	6	1	5	0	2	4	4	2	0	2	3	0	7	1	2	4	3	1	2	9	15	18	2	0	3	4	9	0	1	4	3	8	0	4	3	0
CUT591	CUT591	CUT591	1	0	1	5	3	1	30	8	5	7	0	8	2	8	3	13	7	2	1	0	2	13	4	12	1	0	1	3	3	1	3	3	2	2	0	4	7	14	8	6	6	1	4	0	4	12	3
CUT592	CUT592	CUT592	0	2	3	6	4	4	16	9	14	6	0	1	1	3	2	6	1	3	1	1	3	0	4	6	0	3	3	4	4	4	1	4	6	1	0	0	4	5	5	3	1	2	4	3	7	0	3
CUT593	CUT593	CUT593	0	0	0	0	0	0	24	8	5	2	0	1	0	0	1	0	2	2	1	0	0	0	2	2	0	0	0	0	0	0	2	3	2	0	0	0	0	0	3	0	2	1	4	0	0	0	2
CUT594	CUT594	CUT594	2	2	2	3	3	2	94	10	16	24	0	4	0	1	0	4	1	4	2	2	0	1	3	5	2	3	2	2	3	2	8	4	7	6	0	2	0	2	0	2	1	3	8	5	0	1	2
CUT595	CUT595	CUT595	1	0	1	0	0	0	46	9	7	3	0	1	0	0	0	2	0	0	0	0	0	2	0	0	1	0	1	0	0	0	4	4	3	1	0	0	0	0	0	1	0	0	0	0	0	2	0
CUT596	CUT596	CUT596	0	1	0	0	0	0	36	19	13	2	0	0	0	0	0	4	0	0	0	0	0	1	1	0	0	2	0	0	0	0	3	8	6	0	0	0	0	0	0	2	0	0	0	0	0	1	1
CUT597	CUT597	CUT597	0	1	1	4	1	0	64	13	27	3	0	1	0	2	1	3	1	6	1	1	0	0	2	1	0	2	1	3	1	0	6	5	12	1	0	0	0	3	3	1	1	4	4	3	0	0	2
CUT598	CUT598	CUT598	0	1	1	3	3	1	16	3	14	1	0	2	0	2	0	0	1	2	1	0	1	2	0	0	0	2	1	2	3	1	1	1	6	0	0	1	0	3	0	0	1	1	4	0	2	2	0
CUT599	CUT599	CUT599	16	6	13	39	25	26	696	111	140	48	1	32	5	4	7	20	14	26	7	7	9	13	17	26	17	10	13	27	25	23	60	46	64	12	14	15	18	7	18	10	13	16	27	18	20	12	14
CUT600	CUT600	CUT600	1	0	3	0	0	0	32	66	65	6	0	2	1	0	2	11	0	2	0	0	0	3	5	4	1	0	3	0	0	0	3	27	30	1	0	1	4	0	5	5	0	1	0	0	0	3	4
CUT601	CUT601	CUT601	4	2	6	6	2	3	58	35	25	12	0	9	0	0	0	1	3	2	0	1	0	2	1	3	4	3	6	4	2	3	5	15	11	3	0	4	0	0	0	0	3	1	0	3	0	2	1
CUT602	CUT602	CUT602	64	38	95	43	98	67	3252	1062	797	567	10	1187	20	44	24	216	122	167	12	37	44	69	236	238	69	65	94	29	99	59	280	442	362	140	137	554	71	77	63	106	113	105	46	93	97	61	195
CUT603	CUT603	CUT603	0	0	0	0	0	0	2	11	6	0	0	0	0	0	0	1	0	0	1	0	0	0	0	0	0	0	0	0	0	0	0	5	3	0	0	0	0	0	0	0	0	0	4	0	0	0	0
CUT604	CUT604	CUT604	1	0	0	1	0	0	22	30	22	0	0	1	0	0	0	1	0	1	1	0	0	0	0	2	1	0	0	1	0	0	2	12	10	0	0	0	0	0	0	0	0	1	4	0	0	0	0
CUT605	CUT605	CUT605	0	3	7	7	2	3	226	130	127	19	0	10	1	0	2	17	8	8	3	0	1	2	8	12	0	5	7	5	2	3	19	54	58	5	0	5	4	0	5	8	7	5	12	0	2	2	7
CUT606	CUT606	CUT606	13	22	37	56	31	33	752	154	86	82	1	29	11	23	12	63	24	46	10	11	24	17	43	49	14	38	37	38	31	29	65	64	39	20	14	14	39	40	31	31	22	29	38	28	53	15	35
CUT607	CUT607	CUT607	1	4	3	5	1	1	54	33	46	6	0	6	3	3	3	3	4	4	1	3	1	4	2	6	1	7	3	3	1	1	5	14	21	1	0	3	11	5	8	1	4	3	4	8	2	4	2
CUT608	CUT608	CUT608	0	0	0	0	0	1	22	13	14	1	0	3	0	0	1	2	2	0	0	0	0	0	1	0	0	0	0	0	0	1	2	5	6	0	0	1	0	0	3	1	2	0	0	0	0	0	1
CUT609	CUT609	CUT609	1	0	2	11	5	5	20	9	14	5	0	3	1	0	0	2	0	0	0	0	0	2	1	4	1	0	2	7	5	4	2	4	6	1	0	1	4	0	0	1	0	0	0	0	0	2	1
CUT610	CUT610	CUT610	5	2	4	12	1	9	194	75	80	13	0	5	3	0	0	13	3	9	0	2	2	5	2	5	5	3	4	8	1	8	17	31	36	3	0	2	11	0	0	6	3	6	0	5	4	4	2
CUT611	CUT611	CUT611	0	0	0	2	0	0	24	18	28	1	0	1	0	0	0	2	0	0	0	0	0	0	1	3	0	0	0	1	0	0	2	7	13	0	0	0	0	0	0	1	0	0	0	0	0	0	1
CUT612	CUT612	CUT612	0	3	0	2	1	1	68	48	84	2	0	2	0	0	0	4	3	1	2	0	1	2	1	4	0	5	0	1	1	1	6	20	38	0	0	1	0	0	0	2	3	1	8	0	2	2	1
CUT613	CUT613	CUT613	5	3	4	5	2	4	180	33	40	21	0	12	1	1	1	6	2	3	0	0	3	1	2	5	5	5	4	3	2	4	16	14	18	5	0	6	4	2	3	3	2	2	0	0	7	1	2
CUT614	CUT614	CUT614	2	1	1	3	0	3	40	13	28	7	0	6	0	2	0	6	1	2	0	0	0	2	0	8	2	2	1	2	0	3	3	5	13	2	0	3	0	3	0	3	1	1	0	0	0	2	0
CUT615	CUT615	CUT615	1	3	4	5	3	4	60	56	72	12	1	9	1	2	1	4	5	5	0	1	1	3	4	13	1	5	4	3	3	4	5	23	33	3	14	4	4	3	3	2	5	3	0	3	2	3	3
CUT616	CUT616	CUT616	1	2	2	3	2	1	54	38	35	9	0	2	0	1	1	4	2	1	0	1	1	1	1	2	1	3	2	2	2	1	5	16	16	2	0	1	0	2	3	2	2	1	0	3	2	1	1
CUT617	CUT617	CUT617	0	0	1	1	0	0	20	23	43	0	0	0	0	2	0	1	1	2	0	0	0	1	1	1	0	0	1	1	0	0	2	10	20	0	0	0	0	3	0	0	1	1	0	0	0	1	1
CUT618	CUT618	CUT618	0	1	1	0	1	0	40	10	19	3	0	2	0	0	0	0	0	2	0	0	1	0	0	2	0	2	1	0	1	0	3	4	9	1	0	1	0	0	0	0	0	1	0	0	2	0	0
CUT619	CUT619	CUT619	0	0	1	0	1	0	42	38	48	1	1	0	0	0	0	0	1	1	0	0	0	3	0	0	0	0	1	0	1	0	4	16	22	0	14	0	0	0	0	0	1	1	0	0	0	3	0
CUT620	CUT620	CUT620	0	3	5	4	0	0	56	56	82	3	0	2	0	0	0	6	2	1	0	0	1	2	2	5	0	5	5	3	0	0	5	23	37	1	0	1	0	0	0	3	2	1	0	0	2	2	2
CUT621	CUT621	CUT621	0	0	1	1	2	2	86	13	27	3	0	1	1	1	3	6	1	6	0	3	2	2	3	5	0	0	1	1	2	2	7	5	12	1	0	0	4	2	8	3	1	4	0	8	4	2	2
CUT622	CUT622	CUT622	9	2	2	9	9	19	240	11	20	92	2	81	8	12	7	26	15	20	10	8	11	21	15	39	10	3	2	6	9	17	21	5	9	23	27	38	28	21	18	13	14	13	38	20	24	19	12
CUT623	CUT623	CUT623	0	0	4	2	3	0	98	41	59	7	0	8	2	2	0	6	2	8	0	3	2	2	2	8	0	0	4	1	3	0	8	17	27	2	0	4	7	3	0	3	2	5	0	8	4	2	2
CUT624	CUT624	CUT624	1	2	2	8	7	14	58	21	24	3	0	3	1	5	2	3	4	6	5	5	4	0	1	8	1	3	2	5	7	12	5	9	11	1	0	1	4	9	5	1	4	4	19	13	9	0	1
CUT625	CUT625	CUT625	1	1	0	1	1	0	52	8	6	2	0	3	0	0	0	1	0	0	0	0	1	1	0	0	1	2	0	1	1	0	4	3	3	0	0	1	0	0	0	0	0	0	0	0	2	1	0
CUT626	CUT626	CUT626	3	0	5	15	11	9	132	46	41	15	0	20	2	4	1	11	2	5	3	5	6	10	17	20	3	0	5	10	11	8	11	19	19	4	0	9	7	7	3	5	2	3	12	13	13	9	14
CUT627	CUT627	CUT627	2	3	15	13	3	7	106	16	20	23	0	17	0	2	0	12	5	3	0	1	1	6	3	10	2	5	15	9	3	6	9	7	9	6	0	8	0	3	0	6	5	2	0	3	2	5	2
CUT628	CUT628	CUT628	7718	5371	10359	7975	6939	8021	40162	6144	4594	22101	332	9505	1591	3959	2578	21510	16766	26818	1675	2162	3387	11257	19172	29050	8278	9176	10303	5434	7018	7091	3462	2559	2088	5447	4533	4434	5644	6892	6750	10572	15471	16857	6432	5437	7450	10001	15807
CUT629	CUT629	CUT629	14	5	12	15	9	8	268	41	47	43	0	30	2	1	5	15	9	7	0	2	1	9	7	17	15	9	12	10	9	7	23	17	21	11	0	14	7	2	13	7	8	4	0	5	2	8	6
CUT630	CUT630	CUT630	5	1	0	5	2	4	130	19	13	15	0	2	0	0	1	14	0	2	1	0	1	2	3	5	5	2	0	3	2	4	11	8	6	4	0	1	0	0	3	7	0	1	4	0	2	2	2
CUT631	CUT631	CUT631	1	0	0	0	1	3	34	5	7	3	0	7	0	0	0	0	0	2	1	0	1	2	0	0	1	0	0	0	1	3	3	2	3	1	0	3	0	0	0	0	0	1	4	0	2	2	0
CUT632	CUT632	CUT632	3	1	9	9	1	5	978	174	148	27	0	20	1	7	1	6	3	5	1	1	1	8	5	12	3	2	9	6	1	4	84	72	67	7	0	9	4	12	3	3	3	3	4	3	2	7	4
CUT633	CUT633	CUT633	0	2	0	5	0	1	38	16	24	6	0	0	1	0	0	2	0	1	0	0	1	1	0	1	0	3	0	3	0	1	3	7	11	1	0	0	4	0	0	1	0	1	0	0	2	1	0
CUT634	CUT634	CUT634	2	1	1	14	12	8	354	97	69	18	0	10	4	5	3	9	5	5	0	7	5	3	3	12	2	2	1	10	12	7	31	40	31	4	0	5	14	9	8	4	5	3	0	18	11	3	2
CUT635	CUT635	CUT635	28	10	17	26	14	16	128	23	20	65	0	43	6	12	5	43	22	23	6	4	14	21	21	21	30	17	17	18	14	14	11	10	9	16	0	20	21	21	13	21	20	14	23	10	31	19	17
CUT636	CUT636	CUT636	0	0	0	1	1	3	44	10	5	22	0	5	1	2	0	8	4	5	0	0	1	4	5	4	0	0	0	1	1	3	4	4	2	5	0	2	4	3	0	4	4	3	0	0	2	4	4
CUT637	CUT637	CUT637	0	0	4	3	1	3	100	28	38	5	0	4	0	0	0	3	3	3	1	0	0	4	2	1	0	0	4	2	1	3	9	12	17	1	0	2	0	0	0	1	3	2	4	0	0	4	2
CUT638	CUT638	CUT638	0	0	0	1	0	0	18	17	15	1	0	0	0	0	0	3	0	0	0	0	0	2	1	1	0	0	0	1	0	0	2	7	7	0	0	0	0	0	0	1	0	0	0	0	0	2	1
CUT639	CUT639	CUT639	2	2	1	20	17	13	66	14	11	13	0	5	1	5	3	4	4	6	3	3	2	6	2	5	2	3	1	14	17	11	6	6	5	3	0	2	4	9	8	2	4	4	12	8	4	5	2
CUT640	CUT640	CUT640	1	0	2	2	2	5	42	23	36	5	0	5	2	5	1	7	5	3	1	1	3	6	6	1	1	0	2	1	2	4	4	10	16	1	0	2	7	9	3	3	5	2	4	3	7	5	5
CUT641	CUT641	CUT641	0	1	1	11	6	5	16	3	1	7	0	7	0	1	2	1	0	0	2	2	0	1	2	1	0	2	1	7	6	4	1	1	0	2	0	3	0	2	5	0	0	0	8	5	0	1	2
CUT642	CUT642	CUT642	1	0	0	1	2	0	28	12	14	2	0	2	0	0	0	1	0	2	0	0	0	0	0	1	1	0	0	1	2	0	2	5	6	0	0	1	0	0	0	0	0	1	0	0	0	0	0
CUT643	CUT643	CUT643	0	0	0	1	0	0	28	12	12	0	0	1	0	1	0	0	1	0	0	0	0	0	0	1	0	0	0	1	0	0	2	5	5	0	0	0	0	2	0	0	1	0	0	0	0	0	0
CUT644	CUT644	CUT644	0	0	0	0	0	0	60	28	43	3	0	5	0	0	0	1	1	1	0	0	0	0	1	0	0	0	0	0	0	0	5	12	20	1	0	2	0	0	0	0	1	1	0	0	0	0	1
CUT645	CUT645	CUT645	0	0	0	5	3	1	64	23	38	13	1	2	1	2	0	5	1	3	2	1	1	3	4	7	0	0	0	3	3	1	6	10	17	3	14	1	4	3	0	2	1	2	8	3	2	3	3
CUT646	CUT646	CUT646	0	0	2	1	1	1	32	10	28	1	0	1	1	1	1	6	2	3	0	0	1	0	1	3	0	0	2	1	1	1	3	4	13	0	0	0	4	2	3	3	2	2	0	0	2	0	1
CUT647	CUT647	CUT647	0	0	0	2	0	2	48	83	50	3	0	2	1	0	0	1	1	0	0	2	0	1	1	0	0	0	0	1	0	2	4	35	23	1	0	1	4	0	0	0	1	0	0	5	0	1	1
CUT648	CUT648	CUT648	98	75	88	122	69	77	384	76	66	377	6	122	19	64	21	220	103	194	29	23	29	160	109	180	105	128	88	83	70	68	33	32	30	93	82	57	67	111	55	108	95	122	111	58	64	142	90
CUT649	CUT649	CUT649	0	2	3	2	1	5	52	34	49	12	0	4	1	4	1	5	4	5	0	0	0	0	1	4	0	3	3	1	1	4	4	14	22	3	0	2	4	7	3	2	4	3	0	0	0	0	1
CUT650	CUT650	CUT650	5	4	4	10	10	15	208	56	45	22	0	6	3	2	2	10	6	6	1	0	0	3	6	9	5	7	4	7	10	13	18	23	20	5	0	3	11	3	5	5	6	4	4	0	0	3	5
CUT651	CUT651	CUT651	15	6	20	44	26	26	484	137	115	80	3	26	7	10	5	23	13	22	7	7	8	11	23	35	16	10	20	30	26	23	42	57	52	20	41	12	25	17	13	11	12	14	27	18	18	10	19
CUT652	CUT652	CUT652	5	4	5	34	24	17	114	27	26	41	0	22	1	10	8	14	4	10	3	7	7	9	8	21	5	7	5	23	24	15	10	11	12	10	0	10	4	17	21	7	4	6	12	18	15	8	7
CUT653	CUT653	CUT653	1	0	0	0	0	0	22	6	12	2	0	0	0	0	0	2	0	1	0	0	0	0	0	1	1	0	0	0	0	0	2	2	5	0	0	0	0	0	0	1	0	1	0	0	0	0	0
CUT654	CUT654	CUT654	2	1	2	4	3	3	86	53	43	2	0	1	1	1	0	8	2	9	0	0	2	3	4	5	2	2	2	3	3	3	7	22	20	0	0	0	4	2	0	4	2	6	0	0	4	3	3
CUT655	CUT655	CUT655	5	1	4	8	13	4	162	101	94	3	0	3	1	1	2	14	1	10	0	1	2	5	4	5	5	2	4	5	13	4	14	42	43	1	0	1	4	2	5	7	1	6	0	3	4	4	3
CUT656	CUT656	CUT656	1	3	1	2	2	0	112	39	54	7	0	2	0	1	2	7	2	2	0	0	1	2	4	3	1	5	1	1	2	0	10	16	25	2	0	1	0	2	5	3	2	1	0	0	2	2	3
CUT657	CUT657	CUT657	0	0	1	12	7	8	82	28	28	8	0	3	1	0	1	8	2	9	1	0	2	2	4	5	0	0	1	8	7	7	7	12	13	2	0	1	4	0	3	4	2	6	4	0	4	2	3
CUT658	CUT658	CUT658	0	0	0	0	0	0	8	3	0	0	0	0	1	0	0	0	0	0	0	0	0	0	0	0	0	0	0	0	0	0	1	1	0	0	0	0	4	0	0	0	0	0	0	0	0	0	0
CUT659	CUT659	CUT659	0	0	0	3	0	0	34	17	8	0	0	1	1	1	0	1	0	0	0	1	0	0	0	0	0	0	0	2	0	0	3	7	4	0	0	0	4	2	0	0	0	0	0	3	0	0	0
CUT660	CUT660	CUT660	1	2	0	1	1	0	14	6	15	2	0	2	0	0	0	2	2	1	0	0	0	2	1	0	1	3	0	1	1	0	1	2	7	0	0	1	0	0	0	1	2	1	0	0	0	2	1
CUT661	CUT661	CUT661	3	3	4	10	4	4	210	106	90	11	0	16	4	0	5	5	6	6	3	2	3	2	5	11	3	5	4	7	4	4	18	44	41	3	0	7	14	0	13	2	6	4	12	5	7	2	4
CUT662	CUT662	CUT662	3	2	1	26	28	19	4	1	3	14	0	14	1	0	1	4	5	5	4	2	1	4	5	6	3	3	1	18	28	17	0	0	1	3	0	7	4	0	3	2	5	3	15	5	2	4	4
CUT663	CUT663	CUT663	0	0	1	0	0	0	2	3	2	1	0	1	0	0	0	1	0	0	0	0	0	0	0	0	0	0	1	0	0	0	0	1	1	0	0	0	0	0	0	0	0	0	0	0	0	0	0
CUT664	CUT664	CUT664	4	3	3	2	2	1	120	26	37	17	0	4	0	0	0	3	2	3	0	0	0	0	3	2	4	5	3	1	2	1	10	11	17	4	0	2	0	0	0	1	2	2	0	0	0	0	2
CUT665	CUT665	CUT665	56	20	42	127	56	82	562	58	53	189	5	64	21	54	41	123	70	83	20	37	38	57	62	83	60	34	42	87	57	72	48	24	24	47	68	30	74	94	107	60	65	52	77	93	84	51	51
CUT666	CUT666	CUT666	0	2	1	5	1	3	96	14	8	7	0	3	1	2	0	1	0	3	0	0	0	1	1	4	0	3	1	3	1	3	8	6	4	2	0	1	4	3	0	0	0	2	0	0	0	1	1
CUT667	CUT667	CUT667	0	0	0	0	0	0	28	8	8	0	0	0	0	0	0	0	0	0	0	1	0	1	1	1	0	0	0	0	0	0	2	3	4	0	0	0	0	0	0	0	0	0	0	3	0	1	1
CUT668	CUT668	CUT668	0	1	1	1	3	0	52	9	8	2	0	1	0	1	0	1	0	0	0	0	0	1	2	1	0	2	1	1	3	0	4	4	4	0	0	0	0	2	0	0	0	0	0	0	0	1	2
CUT669	CUT669	CUT669	0	1	0	1	1	1	30	30	33	2	1	1	0	2	1	1	0	1	0	1	0	2	1	2	0	2	0	1	1	1	3	12	15	0	14	0	0	3	3	0	0	1	0	3	0	2	1
CUT670	CUT670	CUT670	0	0	0	0	1	0	12	11	10	2	0	0	0	0	1	4	0	3	0	0	1	0	0	1	0	0	0	0	1	0	1	5	5	0	0	0	0	0	3	2	0	2	0	0	2	0	0
CUT671	CUT671	CUT671	0	0	0	2	0	0	52	41	36	2	0	1	0	0	0	1	0	2	0	0	0	1	1	1	0	0	0	1	0	0	4	17	16	0	0	0	0	0	0	0	0	1	0	0	0	1	1
CUT672	CUT672	CUT672	4	2	3	8	3	4	82	24	24	9	0	15	2	1	4	5	4	2	0	1	1	4	3	7	4	3	3	5	3	4	7	10	11	2	0	7	7	2	10	2	4	1	0	3	2	4	2
CUT673	CUT673	CUT673	53	13	41	72	57	86	1018	85	89	177	1	71	20	31	14	139	68	74	11	16	18	75	84	82	57	22	41	49	58	76	88	35	40	44	14	33	71	54	37	68	63	47	42	40	40	67	69
CUT674	CUT674	CUT674	0	3	4	2	0	0	82	45	43	2	0	1	0	0	0	0	0	0	0	1	0	0	3	4	0	5	4	1	0	0	7	19	20	0	0	0	0	0	0	0	0	0	0	3	0	0	2
CUT675	CUT675	CUT675	0	1	0	0	1	0	6	1	1	2	0	0	0	1	0	0	0	1	0	0	0	0	0	1	0	2	0	0	1	0	1	0	0	0	0	0	0	2	0	0	0	1	0	0	0	0	0
CUT676	CUT676	CUT676	0	0	0	2	1	0	6	3	7	1	0	6	0	0	0	1	1	0	0	0	0	1	0	0	0	0	0	1	1	0	1	1	3	0	0	3	0	0	0	0	1	0	0	0	0	1	0
CUT677	CUT677	CUT677	0	0	9	4	5	2	130	35	51	17	0	19	0	0	1	12	3	5	0	0	1	4	1	7	0	0	9	3	5	2	11	15	23	4	0	9	0	0	3	6	3	3	0	0	2	4	1
CUT678	CUT678	CUT678	3	0	0	1	0	2	42	17	21	9	0	2	0	2	0	4	1	4	1	0	0	3	2	3	3	0	0	1	0	2	4	7	10	2	0	1	0	3	0	2	1	3	4	0	0	3	2
CUT679	CUT679	CUT679	3	0	0	1	0	1	62	23	25	6	0	5	0	2	0	4	0	4	1	0	0	3	2	3	3	0	0	1	0	1	5	10	11	1	0	2	0	3	0	2	0	3	4	0	0	3	2
CUT680	CUT680	CUT680	0	3	3	0	0	0	92	7	21	2	0	1	0	0	0	1	0	0	1	0	0	0	0	1	0	5	3	0	0	0	8	3	10	0	0	0	0	0	0	0	0	0	4	0	0	0	0
CUT681	CUT681	CUT681	1	1	4	3	0	2	84	25	17	3	0	4	0	1	1	2	2	5	1	1	1	2	4	2	1	2	4	2	0	2	7	10	8	1	0	2	0	2	3	1	2	3	4	3	2	2	3
CUT682	CUT682	CUT682	1	0	1	5	4	4	16	0	6	3	0	2	0	1	0	3	2	0	1	1	2	3	0	0	1	0	1	3	4	4	1	0	3	1	0	1	0	2	0	1	2	0	4	3	4	3	0
CUT683	CUT683	CUT683	1	0	0	2	1	1	26	3	4	3	0	5	0	2	0	0	4	1	1	0	2	4	1	3	1	0	0	1	1	1	2	1	2	1	0	2	0	3	0	0	4	1	4	0	4	4	1
CUT684	CUT684	CUT684	2	0	2	1	0	0	24	7	9	3	0	3	0	2	0	1	1	1	1	0	2	3	1	2	2	0	2	1	0	0	2	3	4	1	0	1	0	3	0	0	1	1	4	0	4	3	1
[truncated: 10,290 more rows]
[truncated: 14 more columns]

## Sheet: Column description
	Column	Column description
	Id	Identifier
	Syst_name	Systematic name
	Gene	Gene name
	WT1	Count WT input, replicate 1
	WT2	Count WT input, replicate 2
	WT3	Count WT input, replicate 3
	RIP_UPF1_1	Count Upf1-RIP, replicate 1
	RIP_UPF1_2	Count Upf1-RIP, replicate 2
	RIP_UPF1_3	Count Upf1-RIP, replicate 3
	RIP_eIF4G2_1	Count eIF4G2-RIP, replicate 1
	RIP_eIF4G2_2	Count eIF4G2-RIP, replicate 2
	RIP_eIF4G2_3	Count eIF4G2-RIP, replicate 3
	UPF1Delta1	Count upf1_delta, replicate 1
	UPF1Delta2	Count upf1_delta, replicate 2
	UPF1Delta3	Count upf1_delta, replicate 3
	RIP_Upf1_del_Upf2_1	Count Upf1-RIP, upf2∆, replicate 1
	RIP_Upf1_del_Upf2_2	Count Upf1-RIP, upf2∆, replicate 2
	RIP_Upf1_del_Upf2_3	Count Upf1-RIP, upf2∆, replicate 3
	TOT_Upf1_del_Upf2_1	Count Upf1-RIP upf2∆, Input replicate 1
	TOT_Upf1_del_Upf2_2	Count Upf1-RIP upf2∆, Input replicate 2
	TOT_Upf1_del_Upf2_3	Count Upf1-RIP upf2∆, Input replicate 3
	RIP_Upf1_del_Upf3_1	Count Upf1-RIP, upf3∆, replicate 1
	RIP_Upf1_del_Upf3_2	Count Upf1-RIP, upf3∆, replicate 2
	RIP_Upf1_del_Upf3_3	Count Upf1-RIP, upf3∆, replicate 3
	TOT_Upf1_del_Upf3_1	Count Upf1-RIP upf3∆, Input replicate 1
	TOT_Upf1_del_Upf3_2	Count Upf1-RIP upf3∆, Input replicate 2
	TOT_Upf1_del_Upf3_3	Count Upf1-RIP upf3∆, Input replicate 3
	norm.WT1	normalized count WT input, replicate 1
	norm.WT2	normalized count WT input, replicate 2
	norm.WT3	normalized count WT input, replicate 3
	norm.RIP_UPF1_1	normalized count Upf1-RIP, replicate 1
	norm.RIP_UPF1_2	normalized count Upf1-RIP, replicate 2
	norm.RIP_UPF1_3	normalized count Upf1-RIP, replicate 3
	norm.RIP_eIF4G2_1	normalized count eIF4G2-RIP, replicate 1
	norm.RIP_eIF4G2_2	normalized count eIF4G2-RIP, replicate 2
	norm.RIP_eIF4G2_3	normalized count eIF4G2-RIP, replicate 3
	norm.UPF1Delta1	normalized count upf1_delta, replicate 1
	norm.UPF1Delta2	normalized count upf1_delta, replicate 2
	norm.UPF1Delta3	normalized count upf1_delta, replicate 3
	norm.RIP_Upf1_del_Upf2_1	normalized count Upf1-RIP, upf2∆, replicate 1
	norm.RIP_Upf1_del_Upf2_2	normalized count Upf1-RIP, upf2∆, replicate 2
	norm.RIP_Upf1_del_Upf2_3	normalized count Upf1-RIP, upf2∆, replicate 3
	norm.TOT_Upf1_del_Upf2_1	normalized count Upf1-RIP upf2∆, Input replicate 1
	norm.TOT_Upf1_del_Upf2_2	normalized count Upf1-RIP upf2∆, Input replicate 2
	norm.TOT_Upf1_del_Upf2_3	normalized count Upf1-RIP upf2∆, Input replicate 3
	norm.RIP_Upf1_del_Upf3_1	normalized count Upf1-RIP, upf3∆, replicate 1
	norm.RIP_Upf1_del_Upf3_2	normalized count Upf1-RIP, upf3∆, replicate 2
	norm.RIP_Upf1_del_Upf3_3	normalized count Upf1-RIP, upf3∆, replicate 3
	norm.TOT_Upf1_del_Upf3_1	normalized count Upf1-RIP upf3∆, Input replicate 1
	norm.TOT_Upf1_del_Upf3_2	normalized count Upf1-RIP upf3∆, Input replicate 2
	norm.TOT_Upf1_del_Upf3_3	normalized count Upf1-RIP upf3∆, Input replicate 3
	baseMean	mean count across all the replicates
	WT	Mean count WT
	UPF1RIP	Mean count Upf1 RIP
	eIF4G2	Mean count eIF4G2 RIP
	upf1D	Mean count upf1 delta
	UPF1RIPdelUPF2	Mean count UPF1RIPdelUPF2
	UPF1TOTdelUPF2	Mean count UPF1TOTdelUPF2
	UPF1RIPdelUPF3	Mean count UPF1RIPdelUPF3
	UPF1TOTdelUPF3	Mean count UPF1TOTdelUPF3
	FoldChange	FoldChange Upf1-RIP versus WT Input
	log2FoldChange	log2FoldChange Upf1-RIP versus Wt Input
	pvalue	p value foldChange
	padj	adjusted p value foldChange
